# Supplementary material for: Evaluation of large language models for discovery of gene set function
Source: Research Square preprint supplement (doi:10.21203/rs.3.rs-3270331/v1), 2023-09-18
Supplement: Supplementary file 1 [file 101623adad79a3a5b79924f2.xlsx]

## Sheet: Reviewed Paragraphs
Paragraphs	GO	GPT-4	Genes	Supporting References	Verified	Supportive
The prominent biological process performed by this system of interacting proteins is the modification of mitochondrial tRNA, which is essential for accurate and efficient protein synthesis within the mitochondria.	mitochondrial tRNA modification	Mitochondrial tRNA Modification	HSD17B10 MTO1 TRMT10C TRIT1 PUS1 CDK5RAP1 TRMT5 TRMT61B RPUSD4
1. HSD17B10: This protein, also known as hydroxysteroid (17-beta) dehydrogenase 10, is involved in the metabolism of isoleucine and fatty acids. It also plays a role in the stabilization of mitochondrial tRNA, which is crucial for proper mitochondrial function.				NLM: HSD17B10 hydroxysteroid 17-beta dehydrogenase 10 [Homo sapiens (human)] - Gene | MedLine: NCBI (nih.gov) - https://medlineplus.gov/genetics/gene/hsd17b10/	1	1
2. MTO1: Mitochondrial tRNA translation optimization 1 is responsible for the 5-carboxymethylaminomethyl modification of the wobble uridine base in mitochondrial tRNAs. This modification is essential for accurate decoding during mitochondrial translation.				Boutoual R, Meseguer S, Villarroya M, Martín-Hernández E, Errami M, Martín MA, Casado M, Armengod ME. Defects in the mitochondrial-tRNA modification enzymes MTO1 and GTPBP3 promote different metabolic reprogramming through a HIF-PPARγ-UCP2-AMPK axis. Sci Rep. 2018 Jan 18;8(1):1163. doi: 10.1038/s41598-018-19587-5. PMID: 29348686; PMCID: PMC5773609.	1	1
3. TRMT10C: tRNA methyltransferase 10C is a mitochondrial enzyme that catalyzes the methylation of guanosine at position 9 in tRNA. This modification is important for maintaining the correct structure and function of tRNA molecules.				Bhatta, A., Dienemann, C., Cramer, P. et al. Structural basis of RNA processing by human mitochondrial RNase P. Nat Struct Mol Biol 28, 713–723 (2021). https://doi.org/10.1038/s41594-021-00637-y	1	1
4. TRIT1: tRNA isopentenyltransferase 1 is responsible for the addition of an isopentenyl group to adenosine at position 37 in certain mitochondrial tRNAs. This modification is crucial for maintaining the stability and proper function of tRNA during translation.				Isopentenyl diphosphate (IDP) and its isomer dimethylallyl diphosphate (DMADP) are building units for all isoprenoids; NLM: https://www.ncbi.nlm.nih.gov/gene/54802	1	1
5. PUS1: Pseudouridine synthase 1 catalyzes the conversion of uridine to pseudouridine in tRNA molecules. Pseudouridine is an important modified nucleoside that contributes to the stability and proper folding of tRNA.				NLM: https://www.ncbi.nlm.nih.gov/gene/80324	1	1
6. CDK5RAP1: Cyclin-dependent kinase 5 regulatory subunit-associated protein 1 is involved in the regulation of CDK5 activity, which is important for various cellular processes, including mitochondrial function. CDK5RAP1 also interacts with TRMT61B, suggesting a role in tRNA modification.				CDK5 connection correct. NLM: https://www.ncbi.nlm.nih.gov/gene/51654 CDK5RAP1 is specifically involved in methylating trna, so the statement of its involvement is somewhat weak. As is "suggesting" Direct interaction with TRMT61B seems possible because they act on nearby residues. Reiter V, Matschkal DM, Wagner M, Globisch D, Kneuttinger AC, Müller M, Carell T. The CDK5 repressor CDK5RAP1 is a me…	0	1
7. TRMT5: tRNA methyltransferase 5 is responsible for the methylation of guanosine at position 37 in tRNA. This modification is important for maintaining the correct structure and function of tRNA molecules.				NLM: https://www.ncbi.nlm.nih.gov/gene/57570	1	1
8. TRMT61B: tRNA methyltransferase 61B is a mitochondrial enzyme that catalyzes the formation of 1-methyladenosine at position 58 in tRNA. This modification is essential for the stability and proper function of tRNA during translation.				Chujo T, Suzuki T. Trmt61B is a methyltransferase responsible for 1-methyladenosine at position 58 of human mitochondrial tRNAs. RNA. 2012 Dec;18(12):2269-76. doi: 10.1261/rna.035600.112. Epub 2012 Oct 24. PMID: 23097428; PMCID: PMC3504677.	1	1
9. RPUSD4: RNA pseudouridine synthase domain-containing protein 4 is involved in the formation of pseudouridine in mitochondrial tRNAs. This modification contributes to the stability and proper folding of tRNA.				NLM: https://www.ncbi.nlm.nih.gov/gene/84881	1	1
The most prominent biological process performed by this system of interacting proteins is the acute phase response (APR), which is a rapid inflammatory response to tissue injury, infection, or inflammation. The APR is characterized by the increased production of acute phase proteins (APPs) by the liver, which play a crucial role in the body's defense against pathogens and tissue repair.	acute phase response	acute phase response	SERPINF2 A2M FN1 ASS1 UGT1A1 TRPV1 APOL2 HAMP IL1B TNFSF11 EDNRB REG3G PTGES SAA1 CD163 SERPINA1 CEBPB HP ORM2 SAA4 EPO IL1A CNR1 ITIH4 SAA2 PTGS2 MRGPRX1 INS F2 APCS F8 SIGIRR SERPINA3 IL22 AHSG TNF IL6 CRP TFRC IL6R LBP PLSCR1 ORM1 PTGER3 MBL2 TNFRSF11A REG3A TFR2
1. Acute phase proteins: Several proteins in the list are well-known APPs, such as SERPINA1, SERPINA3, CRP, SAA1, SAA2, SAA4, ORM1, ORM2, HP, and A2M. These proteins are primarily synthesized in the liver and are involved in various aspects of the immune response, including opsonization, complement activation, and neutralization of proteases.				Ercetin E, Richtmann S, Delgado BM, Gomez-Mariano G, Wrenger S, Korenbaum E, Liu B, DeLuca D, Kühnel MP, Jonigk D, Yuskaeva K, Warth A, Muley T, Winter H, Meister M, Welte T, Janciauskiene S, Schneider MA. Clinical Significance of SERPINA1 Gene and Its Encoded Alpha1-antitrypsin Protein in NSCLC. Cancers (Basel). 2019 Sep 4;11(9):1306. doi: 10.3390/cancers11091306. PMID: 31487965; PMCID: PMC67709…	1	1
2. Cytokines and inflammation: The list includes several cytokines and their receptors, such as IL1A, IL1B, IL6, IL6R, IL22, TNF, and TNFRSF11A, which are key mediators of inflammation and regulate the synthesis of APPs. For example, IL6 is a major inducer of the APR and stimulates the production of CRP and other APPs.				Raposo M, Bettencourt C, Ramos A, Kazachkova N, Vasconcelos J, Kay T, Bruges-Armas J, Lima M. Promoter Variation and Expression Levels of Inflammatory Genes IL1A, IL1B, IL6 and TNF in Blood of Spinocerebellar Ataxia Type 3 (SCA3) Patients. Neuromolecular Med. 2017 Mar;19(1):41-45. doi: 10.1007/s12017-016-8416-8. Epub 2016 May 31. PMID: 27246313. NLM: (TNFRSF11A) https://www.ncbi.nlm.nih.gov/gene/…	1	1
3. Coagulation and fibrinolysis: Proteins like F2, F8, and SERPINF2 are involved in the coagulation cascade, which is activated during the APR to prevent blood loss and facilitate tissue repair. Additionally, the fibrinolytic system is regulated by proteins such as SERPINA1 and SERPINF2, which inhibit plasminogen activators and plasmin, respectively.				NLM: https://www.ncbi.nlm.nih.gov/gene/5345 https://www.ncbi.nlm.nih.gov/gene/2147 https://www.ncbi.nlm.nih.gov/gene/2157 Front. Cardiovasc. Med., 07 January 2021 Sec. Atherosclerosis and Vascular Medicine Volume 7 - 2020 | https://doi.org/10.3389/fcvm.2020.622778	1	1
4. Iron homeostasis: Proteins like TFRC, TFR2, and HAMP are involved in iron homeostasis, which is altered during the APR to limit the availability of iron for pathogens. HAMP, also known as hepcidin, is an APP that regulates iron absorption and distribution by binding to ferroportin and inducing its internalization and degradation.				Wessling-Resnick M. Iron homeostasis and the inflammatory response. Annu Rev Nutr. 2010 Aug 21;30:105-22. doi: 10.1146/annurev.nutr.012809.104804. PMID: 20420524; PMCID: PMC3108097.	1	1
5. Lipid metabolism and transport: Proteins like APOL2, APCS, and AHSG are involved in lipid metabolism and transport, which is essential for the immune response and tissue repair. For example, APOL2 is an apolipoprotein that plays a role in lipid transport and metabolism, while APCS is involved in the clearance of apoptotic cells.				NLM: https://www.ncbi.nlm.nih.gov/gene/23780 APCS and AHSG are not obviously involved in lipid transport, etc. APCS is involved in the clearance of apoptotic cells, that is correct: https://www.ncbi.nlm.nih.gov/gene/325 relation of lipid metabolism and immune response is well supported Hubler MJ, Kennedy AJ. Role of lipids in the metabolism and activation of immune cells. J Nutr Biochem. 2016 Aug…	0	1
6. Cellular stress response: Proteins like CEBPB and HSP90AA1 are involved in the cellular stress response, which is activated during the APR to protect cells from damage and promote their survival. CEBPB is a transcription factor that regulates the expression of several APPs, while HSP90AA1 is a molecular chaperone that assists in protein folding and stabilization.				Zuehlke AD, Beebe K, Neckers L, Prince T. Regulation and function of the human HSP90AA1 gene. Gene. 2015 Oct 1;570(1):8-16. doi: 10.1016/j.gene.2015.06.018. Epub 2015 Jun 10. PMID: 26071189; PMCID: PMC4519370. Huggins CJ, Mayekar MK, Martin N, Saylor KL, Gonit M, Jailwala P, Kasoji M, Haines DC, Quiñones OA, Johnson PF. C/EBPγ Is a Critical Regulator of Cellular Stress Response Networks through H…	1	1
The system of interacting proteins primarily involves the catabolism of branched-chain amino acids (BCAAs), which include leucine, isoleucine, and valine. The proteins involved in this process are BCKDHA, BCKDHB, BCKDK, BCAT2, DBT, DLD, HSD17B10, MCCC1, MCCC2, and SLC25A44.	branched-chain amino acid catabolic process	Branched-Chain Amino Acid Catabolism	DBT HIBADH MCCC1 HMGCLL1 HIBCH AUH ACADSB BCKDHA IVD SLC25A44 HMGCL ACAT1 BCKDK HSD17B10 MCCC2 DLD BCKDHB BCAT2 ALDH6A1 ECHS1 ACAD8
1. BCAA transport and transamination: SLC25A44 is a mitochondrial transporter responsible for the uptake of BCAAs into the mitochondria. BCAT2 is a cytosolic enzyme that catalyzes the first step of BCAA catabolism, the reversible transamination of BCAAs to their respective branched-chain alpha-keto acids (BCKAs).				Yoneshiro, T., Wang, Q., Tajima, K. et al. BCAA catabolism in brown fat controls energy homeostasis through SLC25A44. Nature 572, 614–619 (2019). https://doi.org/10.1038/s41586-019-1503-x NLM: https://www.ncbi.nlm.nih.gov/gene/587 Neinast M, Murashige D, Arany Z. Branched Chain Amino Acids. Annu Rev Physiol. 2019 Feb 10;81:139-164. doi: 10.1146/annurev-physiol-020518-114455. Epub 2018 Nov 28. PMI…	1	1
2. BCKA decarboxylation: The BCKAs are further decarboxylated by the branched-chain alpha-keto acid dehydrogenase complex (BCKDC), which consists of BCKDHA, BCKDHB, DBT, and DLD. BCKDK is a kinase that phosphorylates and inactivates BCKDC, regulating BCAA catabolism.				Neinast M, Murashige D, Arany Z. Branched Chain Amino Acids. Annu Rev Physiol. 2019 Feb 10;81:139-164. doi: 10.1146/annurev-physiol-020518-114455. Epub 2018 Nov 28. PMID: 30485760; PMCID: PMC6536377.	1	1
3. HSD17B10 involvement: HSD17B10 is involved in the further metabolism of isoleucine and valine-derived intermediates, catalyzing the oxidation of 2-methyl-3-hydroxybutyryl-CoA to 2-methyl-3-ketoacyl-CoA.				Neinast M, Murashige D, Arany Z. Branched Chain Amino Acids. Annu Rev Physiol. 2019 Feb 10;81:139-164. doi: 10.1146/annurev-physiol-020518-114455. Epub 2018 Nov 28. PMID: 30485760; PMCID: PMC6536377.	1	1
4. MCCC1 and MCCC2 role: MCCC1 and MCCC2 form the mitochondrial enzyme complex 3-methylcrotonyl-CoA carboxylase, which catalyzes the carboxylation of 3-methylcrotonyl-CoA to 3-methylglutaconyl-CoA, an essential step in leucine catabolism.				Neinast M, Murashige D, Arany Z. Branched Chain Amino Acids. Annu Rev Physiol. 2019 Feb 10;81:139-164. doi: 10.1146/annurev-physiol-020518-114455. Epub 2018 Nov 28. PMID: 30485760; PMCID: PMC6536377.	1	1
The remaining proteins (HIBADH, HMGCLL1, HIBCH, AUH, ACADSB, IVD, HMGCL, ACAT1, ALDH6A1, ECHS1, and ACAD8) are involved in various aspects of amino acid and fatty acid metabolism, but they do not directly contribute to the primary process of BCAA catabolism.				HIBCH, AUH, IVD, ALDH6A1, ECHS1,ACAD8, HIBADH are involved in BCAA catabolism Neinast M, Murashige D, Arany Z. Branched Chain Amino Acids. Annu Rev Physiol. 2019 Feb 10;81:139-164. doi: 10.1146/annurev-physiol-020518-114455. Epub 2018 Nov 28. PMID: 30485760; PMCID: PMC6536377.	0	1
The primary biological process performed by this system of interacting proteins is homocysteine metabolism. This process involves the conversion of homocysteine to other essential molecules, such as methionine and cysteine, which are crucial for various cellular functions.	homocysteine metabolic process	Homocysteine Metabolism	LOC102724560 MMUT MTHFR DPEP1 MTHFD1 MTRR CBS MPST CPS1 TST BLMH BHMT CTH NOX4
1. Methionine cycle: MMUT, MTHFR, MTRR, and BHMT are involved in the methionine cycle. MMUT catalyzes the conversion of homocysteine to methionine, while MTHFR and MTRR are involved in the regeneration of methionine from homocysteine. BHMT also plays a role in this process by catalyzing the transfer of a methyl group from betaine to homocysteine, generating methionine.				NLM: https://www.ncbi.nlm.nih.gov/gene/4524 MMUT is wrong, it breaks down methionine to succinyl-CoA. https://www.ncbi.nlm.nih.gov/gene/4594 NLM:https://www.ncbi.nlm.nih.gov/gene/4552 NLM:https://www.ncbi.nlm.nih.gov/gene/635	0	1
2. Transsulfuration pathway: CBS, CTH, and TST are key enzymes in the transsulfuration pathway, which converts homocysteine to cysteine. CBS catalyzes the condensation of homocysteine with serine to form cystathionine, which is then converted to cysteine by CTH. TST is involved in the final step of this pathway, converting thiosulfate to sulfite.				NLM: https://www.ncbi.nlm.nih.gov/gene/1491 NLM: https://www.ncbi.nlm.nih.gov/gene/875 Höfler S, Lorenz C, Busch T, Brinkkötter M, Tohge T, Fernie AR, Braun HP, Hildebrandt TM. Dealing with the sulfur part of cysteine: four enzymatic steps degrade l-cysteine to pyruvate and thiosulfate in Arabidopsis mitochondria. Physiol Plant. 2016 Jul;157(3):352-66. doi: 10.1111/ppl.12454. Epub 2016 Jun 3. PMI…	1	1
3. One-carbon metabolism: MTHFD1 and DPEP1 are involved in one-carbon metabolism, which is essential for the synthesis of purines and thymidylate. MTHFD1 catalyzes the interconversion of one-carbon derivatives of tetrahydrofolate, while DPEP1 hydrolyzes dipeptides and contributes to the recycling of folate.				DPEP1 leads to increased urinary excretion of cysteine. Is related to folate but the mechanism isn't clear. It does not seem to be related to 1-carbon metabolism NLM: DPEP1 https://www.ncbi.nlm.nih.gov/gene/1800 NLM: MTHFD1 https://www.ncbi.nlm.nih.gov/gene/4522	0	0
4. Nitric oxide production: NOX4 is involved in the production of nitric oxide, a signaling molecule that regulates various cellular processes, including vasodilation and immune response. NOX4 generates reactive oxygen species, which can modulate nitric oxide production.				NLM: NOX4 https://www.ncbi.nlm.nih.gov/gene/50507 Presented irrelevant NOX4 information, missed a clear connection to homocysteine: Liu X, Qin Z, Liu C, Song M, Luo X, Zhao H, Qian D, Chen J, Huang L. Nox4 and soluble epoxide hydrolase synergistically mediate homocysteine-induced inflammation in vascular smooth muscle cells. Vascul Pharmacol. 2019 Sep;120:106544. doi: 10.1016/j.vph.2019.01.001. E…	1	0
5. Urea cycle: CPS1 is a key enzyme in the urea cycle, which is responsible for the detoxification of ammonia. CPS1 catalyzes the synthesis of carbamoyl phosphate, a precursor for the production of urea.				urea cycle role is correct. NLM: CPS1 https://www.ncbi.nlm.nih.gov/gene/1373 could not find a connection to homocysteine	1	0
6. Sulfur metabolism: MPST and TST are involved in sulfur metabolism. MPST catalyzes the transfer of sulfur from 3-mercaptopyruvate to cyanide, generating thiocyanate, while TST is involved in the conversion of thiosulfate to sulfite.				Banerjee R, Chiku T, Kabil O, Libiad M, Motl N, Yadav PK. Assay methods for H2S biogenesis and catabolism enzymes. Methods Enzymol. 2015;554:189-200. doi: 10.1016/bs.mie.2014.11.016. Epub 2015 Jan 10. PMID: 25725523; PMCID: PMC4544875. MPST can produce H2S from homocysteine and other sulfur containing AAs. Höfler S, Lorenz C, Busch T, Brinkkötter M, Tohge T, Fernie AR, Braun HP, Hildebrandt TM. D…	1	1
7. Proteolysis: BLMH is a protease that cleaves proteins containing oxidized methionine residues, which can be toxic to cells.				Joanna Suszyńska-Zajczyk, Olga Utyro, Hieronim Jakubowski, Methionine-induced hyperhomocysteinemia and bleomycin hydrolase deficiency alter the expression of mouse kidney proteins involved in renal disease, Molecular Genetics and Metabolism, Volume 112, Issue 4,	1	1
The most prominent biological process performed by this system of interacting proteins is oxytocin signaling. Oxytocin signaling plays a crucial role in various physiological functions, including social bonding, stress regulation, and reproduction.	negative regulation of gastric acid secretion	Oxytocin Signaling	SCT OXTR UCN PTGER3 TFF2 OXT
1. OXT and OXTR interaction: Oxytocin (OXT) is a neuropeptide hormone that binds to its receptor, oxytocin receptor (OXTR). This interaction initiates a signaling cascade that modulates various cellular responses, such as the release of intracellular calcium and activation of downstream signaling pathways.				NLM: OXT https://www.ncbi.nlm.nih.gov/gene/5020 NLM: OXTR https://www.ncbi.nlm.nih.gov/gene/5021	1	1
2. UCN and OXTR interaction: Urocortin (UCN) is a neuropeptide that shares structural similarity with OXT and can also bind to OXTR. This interaction suggests a potential role for UCN in modulating oxytocin signaling, possibly contributing to stress regulation and social behavior.				No evidence that UCN that it binds OXTR. Linkage between corticotropin-releasing factor receptors and oxytocin release has been reported and UCN is a member of the corticotropin releasing factor protein family, so this is not an unreasonable conjecture for a close relationship. But it is not supported fact. Martinon D, Dabrowska J. Corticotropin-Releasing Factor Receptors Modulate Oxytocin Releas…	0	1
3. SCT and OXTR interaction: Secretin (SCT) is another neuropeptide that can bind to OXTR, albeit with lower affinity than OXT. This interaction may provide an additional level of regulation in oxytocin signaling, potentially influencing gastrointestinal functions and energy homeostasis.				Yuki Takayanagi, Masahide Yoshida, Akihide Takashima, Keiko Takanami, Shoma Yoshida, Katsuhiko Nishimori, Ichiko Nishijima, Hirotaka Sakamoto, Takanori Yamagata, Tatsushi Onaka, Activation of Supraoptic Oxytocin Neurons by Secretin Facilitates Social Recognition, Biological Psychiatry, Volume 81, Issue 3, 2017, Secretin and Oxytocin signalling pathways interact but no evidence found for binding	0	1
4. PTGER3 involvement: Prostaglandin E2 receptor 3 (PTGER3) is a G-protein coupled receptor that binds to prostaglandin E2 (PGE2). Although not directly interacting with OXT or OXTR, PTGER3 may modulate oxytocin signaling through crosstalk with other signaling pathways, such as the regulation of intracellular calcium levels and activation of protein kinases.				NLM: PTGER3 https://www.ncbi.nlm.nih.gov/gene/5733	1	0
5. TFF2 and OXT interaction: Trefoil factor 2 (TFF2) is a secreted protein involved in mucosal protection and repair. TFF2 has been shown to interact with OXT, suggesting a potential role in modulating oxytocin signaling in the gastrointestinal tract, possibly influencing gut motility and mucosal integrity.				NLM: TFF2 https://www.ncbi.nlm.nih.gov/gene/7032 No evidence found or the interaction with Oxt.	0	1
The primary biological process performed by this system of interacting proteins is the regulation of cell cycle and apoptosis. This is supported by the presence of several proteins involved in cell cycle progression, cell differentiation, and apoptosis regulation.	spleen development	regulation of cell cycle and apoptosis	PCID2 RC3H2 NKX2-5 JARID2 NKX3-2 BCL3 CACNB4 CDKN2B FLVCR1 BCL2 PBX1 BCL2L11 ADAM17 KMT2A FGF10 SLC40A1 FADD RBM15 PKN1 CDH17 TRAF3IP2 BARX1 CITED2 TCF21 CTC1 RIPK3 PPP2R3C HOXB4 POLB NFKB2 EPB42 PITX2 ONECUT1 NKX2-3 ABL1 RC3H1
1. Cell cycle regulation: CDKN2B, KMT2A, and RBM15 are key proteins involved in cell cycle regulation. CDKN2B is a cyclin-dependent kinase inhibitor that negatively regulates cell cycle progression. KMT2A is a histone methyltransferase that plays a role in chromatin remodeling and gene transcription, influencing cell cycle progression. RBM15 is an RNA-binding protein that regulates mRNA processin…				NLM: KMT2A https://www.ncbi.nlm.nih.gov/gene/4297 KMT2A rearangement is oncogenic but specific association of KMT2A with cell cycle was not found RBM15 - correct : Appel, LM., Franke, V., Benedum, J. et al. The SPOC domain is a phosphoserine binding module that bridges transcription machinery with co- and post-transcriptional regulators. Nat Commun 14, 166 (2023). https://doi.org/10.1038/s41467-0…	0	1
2. Cell differentiation: Several proteins in this system are involved in cell differentiation, including NKX2-5, JARID2, NKX3-2, FGF10, and TCF21. These proteins are transcription factors or signaling molecules that regulate the expression of genes involved in cell differentiation and development.				Pasini, D., Cloos, P., Walfridsson, J. et al. JARID2 regulates binding of the Polycomb repressive complex 2 to target genes in ES cells. Nature 464, 306–310 (2010). https://doi.org/10.1038/nature08788 Anderson, D.J., Kaplan, D.I., Bell, K.M. et al. NKX2-5 regulates human cardiomyogenesis via a HEY2 dependent transcriptional network. Nat Commun 9, 1373 (2018). https://doi.org/10.1038/s41467-018-03…	1	1
3. Apoptosis regulation: BCL2, BCL2L11, FADD, and RIPK3 are proteins involved in the regulation of apoptosis. BCL2 and BCL2L11 are members of the BCL-2 family, which play a crucial role in regulating cell death by controlling mitochondrial membrane permeability. FADD is an adaptor protein that mediates the activation of caspases, leading to apoptosis. RIPK3 is a kinase involved in necroptosis, a …				Singh R, Letai A, Sarosiek K. Regulation of apoptosis in health and disease: the balancing act of BCL-2 family proteins. Nat Rev Mol Cell Biol. 2019 Mar;20(3):175-193. doi: 10.1038/s41580-018-0089-8. PMID: 30655609; PMCID: PMC7325303. Oikonomou, N., Schuijs, M.J., Chatzigiagkos, A. et al. Airway epithelial cell necroptosis contributes to asthma exacerbation in a mouse model of house dust mite-ind…	1	1
4. Additional processes: Other proteins in this system, such as ABL1, ADAM17, and NFKB2, are involved in various cellular processes, including signal transduction, cell adhesion, and immune response regulation. These proteins may indirectly influence cell cycle regulation and apoptosis through their interactions with other proteins in the system.				GPT-4 gave up on the rest of the genes. There no specific facts to be wrong about.
In conclusion, the most prominent biological process performed by this system of interacting proteins is the regulation of the actin cytoskeleton. The interactions between RFLNB, RFLNA, and ZNF664-RFLNA contribute to the organization and dynamics of the actin cytoskeleton, while PTHLH may indirectly influence these processes through its effects on cell proliferation, differentiation, and apoptosi…	negative regulation of chondrocyte development	Actin cytoskeleton regulation	RFLNB, RFLNA, ZNF664-RFLNA, PTHLH	The common theme is that while the facts were correct and support the proposed name, GPT-4's name seems unreasonably general. The relationship to bone development seemed fairly promenent when researching these genes.
1. RFLNB and RFLNA interaction: Both RFLNB and RFLNA belong to the family of filamins, which are actin-binding proteins. Filamins crosslink actin filaments into orthogonal networks, providing mechanical support and facilitating cytoskeleton remodeling. - RFLNB and RFLNA interaction may contribute to the regulation of actin cytoskeleton dynamics and cellular processes such as cell migration and ad…				Gay, O., Gilquin, B., Nakamura, F., Jenkins, Z. A., McCartney, R., Krakow, D., Deshiere, A., Assard, N., Hartwig, J. H., Robertson, S. P., & Baudier, J. (2011). RefilinB (FAM101B) targets FilaminA to organize perinuclear actin networks and regulates nuclear shape. Proceedings of the National Academy of Sciences, 108(28), 11464-11469. https://doi.org/10.1073/pnas.1104211108	1	1
2. ZNF664-RFLNA fusion protein: - ZNF664-RFLNA is a fusion protein resulting from a chromosomal translocation involving the ZNF664 and RFLNA genes. - The fusion protein retains the actin-binding domain of RFLNA, suggesting a potential role in actin cytoskeleton regulation. - ZNF664-RFLNA may affect cellular processes by altering the normal function of RFLNA, potentially leading to aberrant actin …				Shimizu, H., Watanabe, S., Kinoshita, A. et al. Identification of a homozygous frameshift variant in RFLNA in a patient with a typical phenotype of spondylocarpotarsal synostosis syndrome. J Hum Genet 64, 467–471 (2019). https://doi.org/10.1038/s10038-019-0581-9	1	1
3. PTHLH involvement: - PTHLH (parathyroid hormone-like hormone) is a secreted protein involved in endochondral bone development and epithelial-mesenchymal interactions. - PTHLH can regulate cell proliferation, differentiation, and apoptosis through its receptor PTHR1. - Although not directly interacting with the filamin proteins, PTHLH may influence cellular processes that are regulated by the a…				NLM: PTHLH https://www.ncbi.nlm.nih.gov/gene/5744	1	0
In conclusion, this system of interacting proteins is primarily involved in protein degradation and regulation, with a focus on maintaining protein homeostasis and modulating cellular processes such as cell cycle progression, apoptosis, and inflammation.	Positive Regulation Of Metaphase/Anaphase Transition Of Cell Cycle	Protein Degradation and Regulation	CUL3,ELOC,FBXW7,HSP90AA1,MDM2,SKP1,STK11,TNF,VHL
CUL3, ELOC, FBXW7, SKP1, and VHL are components of the Cullin-RING E3 ubiquitin ligase complex, which is involved in protein degradation. CUL3 serves as a scaffold protein, while ELOC and SKP1 are adaptor proteins. FBXW7 is a substrate recognition protein, and VHL is a substrate recognition component for hypoxia-inducible factor (HIF).				Nguyen HC, Yang H, Fribourgh JL, Wolfe LS, Xiong Y. Insights into Cullin-RING E3 ubiquitin ligase recruitment: structure of the VHL-EloBC-Cul2 complex. Structure. 2015 Mar 3;23(3):441-449. doi: 10.1016/j.str.2014.12.014. Epub 2015 Feb 5. PMID: 25661653; PMCID: PMC4351159. Onoyama I, Suzuki A, Matsumoto A, Tomita K, Katagiri H, Oike Y, Nakayama K, Nakayama KI. Fbxw7 regulates lipid metabolism and …	1	1
HSP90AA1 is a molecular chaperone that assists in protein folding and stabilization. It interacts with STK11, a serine/threonine kinase involved in cell cycle regulation and apoptosis.				NLM: HSP90AA1 https://www.ncbi.nlm.nih.gov/gene/3320 Laderian B, Mundi P, Fojo T, E Bates S. Emerging Therapeutic Implications of STK11 Mutation: Case Series. Oncologist. 2020 Sep;25(9):733-737. doi: 10.1634/theoncologist.2019-0846. Epub 2020 Jun 13. PMID: 32396674; PMCID: PMC7485370. Wang Y, Yang L, Yang Y, Li Y. Liver Kinase B1 (LKB1) Regulates Proliferation and Apoptosis of Non-Small Cell Lung…	1	1
MDM2 is an E3 ubiquitin ligase that targets the tumor suppressor protein p53 for degradation. It interacts with HSP90AA1, which stabilizes MDM2 and prevents its self-ubiquitination.				He MY, Xu SB, Qu ZH, Guo YM, Liu XC, Cong XX, Wang JF, Low BC, Li L, Wu Q, Lin P, Yan SG, Bao Z, Zhou YT, Zheng LL. Hsp90β interacts with MDM2 to suppress p53-dependent senescence during skeletal muscle regeneration. Aging Cell. 2019 Oct;18(5):e13003. doi: 10.1111/acel.13003. Epub 2019 Jul 17. PMID: 31313490; PMCID: PMC6718578. Kim, Jun Yeob, Lee, Rusia, Xiao, Gu, Forbes, Dominique, Bargonetti, J…	1	1
TNF is a pro-inflammatory cytokine that plays a role in inflammation, cell proliferation, and apoptosis. It interacts with STK11, which can modulate TNF-induced apoptosis.				Takeda S, Iwai A, Nakashima M, Fujikura D, Chiba S, Li HM, Uehara J, Kawaguchi S, Kaya M, Nagoya S, Wada T, Yuan J, Rayter S, Ashworth A, Reed JC, Yamashita T, Uede T, Miyazaki T. LKB1 is crucial for TRAIL-mediated apoptosis induction in osteosarcoma. Anticancer Res. 2007 Mar-Apr;27(2):761-8. PMID: 17465200.	1	1
HSP90AA1 plays a crucial role in protein folding and stabilization, ensuring proper protein function. Its interaction with STK11 and MDM2 highlights its involvement in regulating cell cycle progression, apoptosis, and the stability of key regulatory proteins.				Kullmann, L., Krahn, M.P. Controlling the master—upstream regulation of the tumor suppressor LKB1. Oncogene 37, 3045–3057 (2018). https://doi.org/10.1038/s41388-018-0145-z He MY, Xu SB, Qu ZH, Guo YM, Liu XC, Cong XX, Wang JF, Low BC, Li L, Wu Q, Lin P, Yan SG, Bao Z, Zhou YT, Zheng LL. Hsp90β interacts with MDM2 to suppress p53-dependent senescence during skeletal muscle regeneration. Aging Cell…	1	1
STK11 serves as a central regulator of cell cycle progression and apoptosis, with its interaction with TNF emphasizing its role in modulating inflammation and cell death.[19][20][21]				Takeda S, Iwai A, Nakashima M, Fujikura D, Chiba S, Li HM, Uehara J, Kawaguchi S, Kaya M, Nagoya S, Wada T, Yuan J, Rayter S, Ashworth A, Reed JC, Yamashita T, Uede T, Miyazaki T. LKB1 is crucial for TRAIL-mediated apoptosis induction in osteosarcoma. Anticancer Res. 2007 Mar-Apr;27(2):761-8. PMID: 17465200.	1	1
The primary biological process performed by this system of interacting proteins is bitter taste perception. The majority of the proteins listed are taste 2 receptors (TAS2Rs), which are G protein-coupled receptors (GPCRs) responsible for detecting bitter compounds. These receptors are expressed in taste receptor cells (TRCs) within taste buds on the tongue.	sensory perception of bitter taste	Bitter Taste Perception	TAS2R46 TAS2R7 TAS2R4 TAS2R39 TAS2R14 TAS2R13 TAS2R30 TAS2R19 CST2 PIP RGS21 TAS2R16 TAS2R3 TAS2R10 TAS2R40 TAS2R8 RTP1 TAS2R5 RTP4 TAS2R60 TAS2R38 RTP3 GNAT2 RTP2 TAS2R43 TAS2R41 ITPR3 CALHM1 GNAT1 CA6 TAS2R20 LPO CST4 REEP2 TAS2R1 GNAT3 TAS2R50 TAS2R31 RTP5 PIGR TAS2R9 PLCB2 CST1 AZGP1
TAS2Rs (e.g., TAS2R46, TAS2R7, TAS2R4, TAS2R39, TAS2R14, TAS2R13, TAS2R30, TAS2R19, TAS2R16, TAS2R3, TAS2R10, TAS2R40, TAS2R8, TAS2R5, TAS2R60, TAS2R38, TAS2R43, TAS2R41, TAS2R20, TAS2R1, TAS2R50, TAS2R31, TAS2R9) are the key components of this system. They bind to bitter compounds, activating intracellular signaling pathways that lead to the perception of bitterness.				Tuzim, K., Korolczuk, A. An update on extra-oral bitter taste receptors. J Transl Med 19, 440 (2021). https://doi.org/10.1186/s12967-021-03067-y	1	1
GNAT1, GNAT2, and GNAT3 are G proteins that couple with TAS2Rs, initiating the intracellular signaling cascade. ITPR3 and CALHM1 are involved in intracellular calcium signaling, which is crucial for the activation of TRCs. PLCB2 is a phospholipase C enzyme that generates inositol trisphosphate (IP3) and diacylglycerol (DAG) upon activation by G proteins, further contributing to calcium signaling.				Zhou, Y., Sun, J., Wang, Y., Chen, C., Tao, T., Ma, M., Chen, X., Zhang, X., Yang, L., Zhang, Z., Li, Y., Jiang, Z., Qiu, T., Wang, H., Pan, Y., Zhang, J., Chen, H., Wang, P., & Zhu, M. (2022). Tas2R activation relaxes airway smooth muscle by release of Gαt targeting on AChR signaling. Proceedings of the National Academy of Sciences, 119(26), e2121513119. https://doi.org/10.1073/pnas.2121513119 N…	1	1
RTP1, RTP2, RTP3, RTP4, and RTP5 are receptor-transporting proteins that facilitate the trafficking of TAS2Rs to the cell surface, ensuring proper receptor function. REEP2 is another protein involved in the trafficking of GPCRs, including TAS2Rs.				Behrens M, Ziegler F. Structure-Function Analyses of Human Bitter Taste Receptors-Where Do We Stand? Molecules. 2020 Sep 26;25(19):4423. doi: 10.3390/molecules25194423. PMID: 32993119; PMCID: PMC7582848.	1	1
CST1, CST2, CST4, PIP, LPO, CA6, PIGR, and AZGP1 are proteins related to the production and secretion of saliva. Although not directly involved in bitter taste perception, they play a role in the overall taste process by facilitating the dissolution and transport of taste compounds to the taste receptors.				Patrikainen, M., Pan, P., Kulesskaya, N. et al. The role of carbonic anhydrase VI in bitter taste perception: evidence from the Car6−/− mouse model. J Biomed Sci 21, 82 (2014). https://doi.org/10.1186/s12929-014-0082-2 Except for CA6, a brief investigation didn't find support for the proteins direct association with bitter taste apart from the GO categorization repeated in multiple gene summary s…	0	1
The prominent biological process performed by this system of interacting proteins is endothelin signaling. Endothelin signaling is crucial for various physiological processes, including vasoconstriction, cell proliferation, and migration.	endothelin receptor signaling pathway	Endothelin Signaling	CRKL EDNRA EDN1 PTK2B BCAR3 EDNRB BCAR1 CDC42 GNA11 SIX1
1. Central role of EDN1, EDNRA, and EDNRB: EDN1 is a potent vasoconstrictor peptide, which binds to its receptors, EDNRA and EDNRB. These receptors are G-protein coupled receptors (GPCRs) that mediate the effects of endothelin-1.				Liu, H., Luo, Q., Zhang, J., Mo, C., Wang, Y., & Li, J. (2019). Endothelins (EDN1, EDN2, EDN3) and their receptors (EDNRA, EDNRB, EDNRB2) in chickens: Functional analysis and tissue distribution. General and Comparative Endocrinology, 283, 113231. https://doi.org/10.1016/j.ygcen.2019.113231	1	1
					39	44
