# Supplementary material for: Evaluation of large language models for discovery of gene set function
Source: Research Square preprint supplement (doi:10.21203/rs.3.rs-3270331/v1), 2023-09-18
Supplement: Supplementary file 2 [file 304b9a29d99d366584554981.xlsx]

## Sheet: Reviewed Citations
Reference	Title	PubMed Link	Paragraph	Abstract	Title Supports	Abstract Supports	Data Set	Gene Set Name
[20] Wang, Jincheng, Hu, Kaili, Cai, Xuanyan, Yang, Bo, He, Qiaojun, Wang, Jiajia, Weng, Qinjie. "Targeting PI3K/AKT signaling for treatment of idiopathic pulmonary fibrosis." Acta pharmaceutica Sinica. B, 2022, pp. 18-32.	Targeting PI3K/AKT signaling for treatment of idiopathic pulmonary fibrosis.	https://pubmed.ncbi.nlm.nih.gov/37340175/	6. NF2 connection: NF2 (neurofibromin 2) is a tumor suppressor protein that interacts with the PI3K/AKT signaling pathway. Loss of NF2 function can lead to increased PI3K/AKT signaling, promoting cell survival and proliferation.[19][20][21]	Idiopathic pulmonary fibrosis (IPF) is a chronic progressive fibrotic interstitial pneumonia with unknown causes. The incidence rate increases year by year and the prognosis is poor without cure. Recently, phosphatidylinositol 3-kinase (PI3K)/protein kinase B (PKB/AKT) signaling pathway can be considered as a master regulator for IPF. The contribution of the PI3K/AKT in fibrotic processes is incr…	0	0	NeST	Neg Regulation EGFR
[8] Liu, Xing-Jun, Liu, Tong, Chen, Gang, Wang, Bing, Yu, Xiao-Lu, Yin, Cui, Ji, Ru-Rong. "TLR signaling adaptor protein MyD88 in primary sensory neurons contributes to persistent inflammatory and neuropathic pain and neuroinflammation." Scientific reports, 2016, pp. 28188.	TLR signaling adaptor protein MyD88 in primary sensory neurons contributes to persistent inflammatory and neuropathic pain and neuroinflammation.	https://pubmed.ncbi.nlm.nih.gov/27312666/	3. TLR and MYD88 signaling: The presence of TLR2 and MYD88 indicates involvement in the Toll-like receptor (TLR) signaling pathway, which plays a crucial role in innate immunity and inflammation.[7][8][9]	Increasing evidence suggests that neuro-immune and neuro-glial interactions are critically involved in chronic pain sensitization. It is well studied how immune/glial mediators sensitize pain, but how sensory neurons control neuroinflammation remains unclear. We employed Myd88 conditional knockout (CKO) mice, in which Myd88 was deleted in sodium channel subunit Nav1.8-expressing primary sensory n…	1	0	Diff. expressed gene set	IL6 JAK STAT3 SIGNALING
[18] Arrigo, André-Patrick, Gibert, Benjamin. "Protein interactomes of three stress inducible small heat shock proteins: HspB1, HspB5 and HspB8." International journal of hyperthermia : the official journal of European Society for Hyperthermic Oncology, North American Hyperthermia Group, 2013, pp. 409-22.	Protein interactomes of three stress inducible small heat shock proteins: HspB1, HspB5 and HspB8.	https://pubmed.ncbi.nlm.nih.gov/23697380/	6. Cellular stress response: HSPB1, DNAJA1, and DNAJC3 are heat shock proteins that help maintain protein homeostasis and can also regulate apoptosis. Oxidative stress response proteins, such as SOD1, SOD2, GPX1, GPX3, and GPX4, protect cells from reactive oxygen species (ROS) and can modulate apoptosis.[16][17][18]	The recent discoveries in the field of human small heat shock proteins (sHSPs) clearly point to the important roles played by these adenosine triphosphate (ATP)-independent chaperones in the regulation of a large spectrum of vital cellular processes and in pathological diseases. These proteins are therefore considered as very attractive therapeutic targets.	1	0	Diff. expressed gene set	APOPTOSIS
[13] Kotoula, Vassiliki, Krikelis, Dimitrios, Karavasilis, Vasilios, Koletsa, Triantafillia, Eleftheraki, Anastasia G, Televantou, Despina, Christodoulou, Christos, Dimoudis, Stefanos, Korantzis, Ippokratis, Pectasides, Dimitrios, Syrigos, Konstantinos N, Kosmidis, Paris A, Fountzilas, George. "Expression of DNA repair and replication genes in non-small cell lung cancer (NSCLC): a role for thymid…	Expression of DNA repair and replication genes in non-small cell lung cancer (NSCLC): a role for thymidylate synthetase (TYMS).	https://pubmed.ncbi.nlm.nih.gov/22866924/	5. Nucleotide metabolism: Several proteins in this system are involved in nucleotide metabolism, including the synthesis, degradation, and interconversion of nucleotides. Key proteins include ADA, ADCY6, APRT, CDA, CMPK2, DUT, GMPR2, GPX4, HPRT1, IMPDH2, ITPA, NT5C, NT5C3A, NUDT9, PNP, TK2, TYMS, and UMPS. These proteins maintain the proper balance of nucleotides within the cell, which is essenti…	BRCA1 (B), ERCC1 (E), RRM1 (R) and TYMS (T) mRNA expression has been extensively studied with respect to NSCLC patient outcome upon various chemotherapy agents. However, these markers have not been introduced into clinical practice yet. One of the reasons seems to be lack of a standard approach for the classification of the reported high/low mRNA expression. The aim of this study was to determine…	0	0	Diff. expressed gene set	DNA REPAIR
[14] Zhang, Yu, Du, Linhu, Yan, Jinhua, Bai, Qianxiang, Niu, Qiao, Mo, Yiqun, Zhang, Qunwei, Nie, Jisheng. "Prenatal benzo[a]pyrene exposure impairs hippocampal synaptic plasticity and cognitive function in SD rat offspring during adolescence and adulthood via HDAC2-mediated histone deacetylation." Ecotoxicology and environmental safety, 2022, pp. 114180.	Prenatal benzo[a]pyrene exposure impairs hippocampal synaptic plasticity and cognitive function in SD rat offspring during adolescence and adulthood via HDAC2-mediated histone deacetylation."	https://pubmed.ncbi.nlm.nih.gov/36265406/	5. Histone deacetylases (HDACs): HDAC2, HDAC5, and HDAC11 are involved in the regulation of gene expression through histone deacetylation, which can modulate the activity of Wnt and Notch signaling pathways.[13][14][15]	Benzo[a]pyrene (B[a]P) is a widespread carcinogenic pollutant in the environment. Although previous studies have demonstrated the neurodevelopmental toxicity of B[a]P, the precise mechanisms underlying the neurotoxic effects induced by prenatal B[a]P exposure remain largely unknown. In the present study, pregnant Sprague-Dawley (SD) rats were injected intraperitoneally with 0, 10, 20, or 40 mg/kg…	1	0	Diff. expressed gene set	WNT BETA CATENIN SIGNALING
[18] Lavie, Julie, De Belvalet, Harmony, Sonon, Sessinou, Ion, Ana Madalina, Dumon, Elodie, Melser, Su, Lacombe, Didier, Dupuy, Jean-William, Lalou, Claude, Bénard, Giovanni. "Ubiquitin-Dependent Degradation of Mitochondrial Proteins Regulates Energy Metabolism." Cell reports, 2018, pp. 2852-2863.	Ubiquitin-Dependent Degradation of Mitochondrial Proteins Regulates Energy Metabolism.	https://pubmed.ncbi.nlm.nih.gov/36308570/	6. Mitochondrial energy production: The system includes proteins involved in the tricarboxylic acid (TCA) cycle and oxidative phosphorylation, such as SDHA, SDHC, SDHD (succinate dehydrogenase subunits), and IDH1, IDH3B, IDH3G (isocitrate dehydrogenases), which are essential for energy production from fatty acid oxidation.[16][17][18]	Through their role in energy generation and regulation of several vital pathways, including apoptosis and inflammation, mitochondria are critical for the life of eukaryotic organisms. Mitochondrial dysfunction is a major problem implicated in the etiology of many pathologies, including neurodegenerative diseases, such as Parkinson's disease (PD), Alzheimer's disease (AD), Huntington's disease (HD…	0	0	Diff. expressed gene set	FATTY ACID METABOLISM
[11] Sun, Min, Chen, Yanan, Liu, Xiaobei, Cui, Yajie. "LncRNACASC9 promotes proliferation, metastasis, and cell cycle inovarian carcinoma cells through cyclinG1/TP53/MMP7 signaling." Bioengineered, 2021, pp. 8006-8019.	LncRNACASC9 promotes proliferation, metastasis, and cell cycle inovarian carcinoma cells through cyclinG1/TP53/MMP7 signaling.	https://pubmed.ncbi.nlm.nih.gov/34595994/	4. Checkpoint kinases: CHEK1 and TP53 are involved in cell cycle checkpoints, which monitor the integrity of the DNA and halt the cell cycle if damage is detected. TP53, a tumor suppressor protein, can induce cell cycle arrest, senescence, or apoptosis in response to DNA damage.[10][11][12]	Ovarian cancer (OC) brings about serious physical and psychological burden for female patients. LncRNA CASC9 has been reported to be intimately linked with the occurrence and development of several tumors. However, the biological role of lncRNA CASC9 in OC still lacks sufficient evidence. The expressions of CASC9 and miR-488-3p in OC cell lines and xenograft mice were detected by qRT-PCR assay. C…	0	0	NeST	Checkpoint-regulated DNA repair
[25] Lindemann, A, Takahashi, H, Patel, A A, Osman, A A, Myers, J N. "Targeting the DNA Damage Response in OSCC with TP53 Mutations." Journal of dental research, 2018, pp. 635-644.	Targeting the DNA Damage Response in OSCC with TP53 Mutations.	https://pubmed.ncbi.nlm.nih.gov/29489434/	9. MDC1 and MDM2 are involved in the regulation of the DNA damage response. MDC1 is a mediator of the response to DSBs, while MDM2 is an E3 ubiquitin ligase that negatively regulates TP53.[25][26][27]	Oral squamous cell carcinoma (OSCC) is the most common type of oral cancer worldwide and in the United States. OSCC remains a major cause of morbidity and mortality in patients with head and neck cancers. Tobacco and alcohol consumption alone or with chewing betel nut are potential risk factors contributing to the high prevalence of OSCC. Multimodality therapies, including surgery, chemotherapy, …	0	0	NeST	ATM-dependent DNA repair
[14] Huang, Xingjun, Liu, Guihua, Guo, Jiao, Su, Zhengquan. "The PI3K/AKT pathway in obesity and type 2 diabetes." International journal of biological sciences, 2018, pp. 1483-1496.	The PI3K/AKT pathway in obesity and type 2 diabetes.	https://pubmed.ncbi.nlm.nih.gov/30263000/	4. PTEN regulation: PTEN (phosphatase and tensin homolog) is a tumor suppressor that negatively regulates the PI3K/AKT signaling pathway. PTEN dephosphorylates PIP3, converting it back to PIP2, and thus inhibiting AKT1 activation.[13][14][15]	Obesity and type 2 diabetes mellitus are complicated metabolic diseases that affect multiple organs and are characterized by hyperglycaemia. Currently, stable and effective treatments for obesity and type 2 diabetes mellitus are not available. Therefore, the mechanisms leading to obesity and diabetes and more effective ways to treat obesity and diabetes should be identified. Based on accumulated …	0	0	NeST	Neg Regulation EGFR
[23] Herrero, Ana, Reis-Cardoso, Mariana, Jiménez-Gómez, Iñaki, Doherty, Carolanne, Agudo-Ibañez, Lorena, Pinto, Adán, Calvo, Fernando, Kolch, Walter, Crespo, Piero, Matallanas, David. "Characterisation of HRas local signal transduction networks using engineered site-specific exchange factors." Small GTPases, 2020, pp. 371-383.	Characterisation of HRas local signal transduction networks using engineered site-specific exchange factors.	https://pubmed.ncbi.nlm.nih.gov/29172991/	8. Signal transduction: ABL1, AKT1, ARAF, BRAF, HRAS, KRAS, and RAF1 are involved in signal transduction pathways, such as the MAPK and PI3K-AKT pathways, which regulate cell proliferation, survival, and differentiation.[22][23][24]	Ras GTPases convey signals from different types of membranes. At these locations, different Ras isoforms, interactors and regulators generate different biochemical signals and biological outputs. The study of Ras localisation-specific signal transduction networks has been hampered by our inability to specifically activate each of these Ras pools. Here, we describe a new set of site-specific tethe…	0	0	NeST	Regulation of cellular homeostasis
[2] Girbl, Tamara, Lenn, Tchern, Perez, Lorena, Rolas, Loïc, Barkaway, Anna, Thiriot, Aude, Del Fresno, Carlos, Lynam, Eleanor, Hub, Elin, Thelen, Marcus, Graham, Gerard, Alon, Ronen, Sancho, David, von Andrian, Ulrich H, Voisin, Mathieu-Benoit, Rot, Antal, Nourshargh, Sussan. "Distinct Compartmentalization of the Chemokines CXCL1 and CXCL2 and the Atypical Receptor ACKR1 Determine Discrete Stage…	Distinct Compartmentalization of the Chemokines CXCL1 and CXCL2 and the Atypical Receptor ACKR1 Determine Discrete Stages of Neutrophil Diapedesis.	https://pubmed.ncbi.nlm.nih.gov/30446388/	- CCL2, CCL4, CCL5, CXCL1, CXCL2, CXCL3, CXCL6, CXCL10, and CXCL11 are chemokines that recruit immune cells to the site of inflammation.[1][2][3]	Neutrophils require directional cues to navigate through the complex structure of venular walls and into inflamed tissues. Here we applied confocal intravital microscopy to analyze neutrophil emigration in cytokine-stimulated mouse cremaster muscles. We identified differential and non-redundant roles for the chemokines CXCL1 and CXCL2, governed by their distinct cellular sources. CXCL1 was produc…	1	1	Diff. expressed gene set	TNFA SIGNALING VIA NFKB
[11] Zhang, Wenjun, Chan, Rebecca J, Chen, Hanying, Yang, Zhenyun, He, Yantao, Zhang, Xian, Luo, Yong, Yin, Fuqing, Moh, Akira, Miller, Lucy C, Payne, R Mark, Zhang, Zhong-Yin, Fu, Xin-Yuan, Shou, Weinian. "Negative regulation of Stat3 by activating PTPN11 mutants contributes to the pathogenesis of Noonan syndrome and juvenile myelomonocytic leukemia." The Journal of biological chemistry, 2009, p…	Negative regulation of Stat3 by activating PTPN11 mutants contributes to the pathogenesis of Noonan syndrome and juvenile myelomonocytic leukemia.	https://pubmed.ncbi.nlm.nih.gov/19509418/	4. Negative regulation: SOCS1 and PTPN11 are negative regulators of the JAK-STAT pathway. SOCS1 inhibits JAK kinase activity, while PTPN11 dephosphorylates and inactivates JAKs and STATs, ensuring controlled signaling.[10][11][12]	Noonan syndrome (NS) is an autosomal dominant congenital disorder characterized by multiple birth defects including heart defects and myeloproliferative disease (MPD). Approximately 50% of NS patients have germline gain-of-function mutations in PTPN11, which encodes the protein-tyrosine phosphatase, Shp2. We provide evidence that conditional ablation of Stat3 in hematopoietic cells and cardiac va…	1	1	NeST	Lymphoid JAK/STAT signaling
[16] Zhao, Simin, Huang, Chengzi, Yang, Yajuan, Xu, Weiwei, Yu, Yongze, Wen, Canxin, Cao, Lili, Gao, Fei, Qin, Yingying, Chen, Zi-Jiang, Guo, Ting, Zhao, Shidou. "DNA repair protein FANCD2 has both ubiquitination-dependent and ubiquitination-independent functions during germ cell development." The Journal of biological chemistry, 2023, pp. 102905.	DNA repair protein FANCD2 has both ubiquitination-dependent and ubiquitination-independent functions during germ cell development.	https://pubmed.ncbi.nlm.nih.gov/36642183/	6. FANCA and FANCD2 are part of the Fanconi anemia (FA) pathway, which is involved in the repair of DNA interstrand crosslinks. The FA pathway cooperates with HR repair to maintain genomic stability.[16][17][18]	When DNA interstrand crosslink lesions occur, a core complex of Fanconi anemia proteins promotes the ubiquitination of FANCD2 and FANCI, which recruit downstream factors to repair the lesion. However, FANCD2 maintains genome stability not only through its ubiquitination-dependent but also its ubiquitination-independent functions in various DNA damage response pathways. Increasing evidence suggest…	0	1	NeST	ATM-dependent DNA repair
[16] Xu, Xia, Zhang, Xinchao, Xing, Huaixin, Liu, Zhifang, Jia, Jihui, Jin, Chunyuan, Zhang, Yingjie. "Importin-4 functions as a driving force in human primary gastric cancer." Journal of cellular biochemistry, 2019, pp. 12638-12646.	Importin-4 functions as a driving force in human primary gastric cancer.	https://pubmed.ncbi.nlm.nih.gov/30861176/	6. Nucleocytoplasmic Transport: IPO4 is an importin that mediates the nuclear import of proteins containing a nuclear localization signal. MAP3K6 is a kinase that phosphorylates target proteins, regulating their subcellular localization and activity.[16][17][18]	Importin-4 (IPO4) is responsible for transporting histones H3 and H4 into the nucleus for chromatin assembly. But, the role of IPO4 in cancer, especially in gastric cancer (GC), has not been fully understood. We aim to determine the expression and function of IPO4 in GC.	0	1	Diff. expressed gene set	MYC TARGETS V2
[13] Yoshida, Kiyotsugu, Miki, Yoshio. "Role of BRCA1 and BRCA2 as regulators of DNA repair, transcription, and cell cycle in response to DNA damage." Cancer science, 2004, pp. 866-71.	Role of BRCA1 and BRCA2 as regulators of DNA repair, transcription, and cell cycle in response to DNA damage.	https://pubmed.ncbi.nlm.nih.gov/32010626/	5. DNA repair and recombination: Proteins such as BRCA2, FANCC, LIG3, RAD21, RAD23B, RAD54L, and WRN are involved in DNA repair and recombination processes, ensuring the maintenance of genomic stability.[13][14][15]	RNA processing was recently found to affect DNA damage response. The RNA processing factors THRAP3 and BCLAF1 play critical role in keeping DNA genomic stability by regulating the transcription, mRNA splicing and export of DNA repair proteins BRCA2, PALB2, Rad51, FANCD2, and FANCL in response to DNA damage. RNA processing factors THRAP3 and BCLAF1 play critical roles in maintaining DNA genomic st…	1	1	Diff. expressed gene set	G2M CHECKPOINT
[22] Ren, Wen, Yang, Lan, Deng, Tian, Wu, Caijuan, Li, Yuanjing, Wu, Jingwen, Huang, Zhu, Du, Faliang, Guo, Lvhua. "Calcitonin gene‑related peptide regulates FOSL2 expression and cell proliferation of BMSCs via mmu_circRNA_003795." Molecular medicine reports, 2019, pp. 3732-3742.	Calcitonin gene‑related peptide regulates FOSL2 expression and cell proliferation of BMSCs via mmu_circRNA_003795.	https://pubmed.ncbi.nlm.nih.gov/30896827/	- FOS, FOSB, FOSL1, FOSL2, JUN, and JUNB are components of the AP-1 transcription factor complex, which regulates cell proliferation, differentiation, and apoptosis.[22][23][24]	Circular RNAs (circRNAs) are a class of non‑coding RNAs that may have important regulatory potency in various biological processes. However, the role of circRNAs and their potential functions in bone marrow mesenchymal stem cells of mice (BMSCs) are still ambiguous. The current study aims to examine the expression of circRNAs and to investigate their effects on FOS like 2 AP‑1 transcription facto…	0	1	Diff. expressed gene set	TNFA SIGNALING VIA NFKB
[15] Hu, Tianjing, Schreiter, Friederike C, Bagchi, Rushita A, Tatman, Philip D, Hannink, Mark, McKinsey, Timothy A. "HDAC5 catalytic activity suppresses cardiomyocyte oxidative stress and NRF2 target gene expression." The Journal of biological chemistry, 2019, pp. 8640-8652.	HDAC5 catalytic activity suppresses cardiomyocyte oxidative stress and NRF2 target gene expression.	https://pubmed.ncbi.nlm.nih.gov/30962285/	5. Histone deacetylases (HDACs): HDAC2, HDAC5, and HDAC11 are involved in the regulation of gene expression through histone deacetylation, which can modulate the activity of Wnt and Notch signaling pathways.[13][14][15]	Histone deacetylase 5 (HDAC5) and HDAC9 are class IIa HDACs that function as signal-responsive repressors of the epigenetic program for pathological cardiomyocyte hypertrophy. The conserved deacetylase domains of HDAC5 and HDAC9 are not required for inhibition of cardiac hypertrophy. Thus, the biological function of class IIa HDAC catalytic activity in the heart remains unknown. Here we demonstra…	1	1	Diff. expressed gene set	WNT BETA CATENIN SIGNALING
[16] Mor, Adam, Philips, Mark R. "Compartmentalized Ras/MAPK signaling." Annual review of immunology, 2006, pp. 771-800.	Compartmentalized Ras/MAPK signaling.	https://pubmed.ncbi.nlm.nih.gov/16551266/	6. Signal transduction: Proteins such as MAPK8IP2, PRKACA, PRKCD, and RASGRP1 are involved in signal transduction pathways. MAPK8IP2 is a scaffold protein that regulates the JNK signaling pathway, while PRKACA and PRKCD are protein kinases that play roles in various signaling pathways. RASGRP1 is a guanine nucleotide exchange factor that activates the Ras signaling pathway.[16][17][18]	Signal transduction down the Ras/MAPK pathway, including that critical to T cell activation, proliferation, and differentiation, has been generally considered to occur at the plasma membrane. It is now clear that the plasma membrane does not represent the only platform for Ras/MAPK signaling. Moreover, the plasma membrane itself is no longer considered a uniform structure but rather a patchwork o…	0	1	Diff. expressed gene set	UV RESPONSE UP
[12] Feki-Tounsi, Molka, Khlifi, Rim, Louati, Ibtihel, Fourati, Mohamed, Mhiri, Mohamed-Nabil, Hamza-Chaffai, Amel, Rebai, Ahmed. "Polymorphisms in XRCC1, ERCC2, and ERCC3 DNA repair genes, CYP1A1 xenobiotic metabolism gene, and tobacco are associated with bladder cancer susceptibility in Tunisian population." Environmental science and pollution research international, 2017, pp. 22476-22484.	Polymorphisms in XRCC1, ERCC2, and ERCC3 DNA repair genes, CYP1A1 xenobiotic metabolism gene, and tobacco are associated with bladder cancer susceptibility in Tunisian population	https://pubmed.ncbi.nlm.nih.gov/28803404/	4. DNA repair and maintenance: Some proteins in this system are involved in DNA repair and maintenance, including ERCC1, ERCC3, MSH2, and TOP2A. These proteins play a role in maintaining the integrity of the cell's genetic material, ensuring proper cellular function and preventing the accumulation of mutations that could lead to disease.[10][11][12]	Other than the established environmental risk factors associated with bladder cancer (BC), little is known about the genetic variations determining the individual susceptibility of this complex disease. This study aimed to investigate the relationship of BC with environmental agents and polymorphisms in XRCC1, ERCC2, and ERCC3 DNA repair genes and CYP1A1, CYP2D6, NAT1, and NAT2 xenobiotic metabol…	1	1	Diff. expressed gene set	PEROXISOME
[24] Yuen, Jessie Wai-Fong, Chung, Grace Tin-Yun, Lun, Samantha Wei-Man, Cheung, Chartia Ching-Mei, To, Ka-Fai, Lo, Kwok-Wai. "Epigenetic inactivation of inositol polyphosphate 4-phosphatase B (INPP4B), a regulator of PI3K/AKT signaling pathway in EBV-associated nasopharyngeal carcinoma." PloS one, 2014, pp. e105163.	Epigenetic inactivation of inositol polyphosphate 4-phosphatase B (INPP4B), a regulator of PI3K/AKT signaling pathway in EBV-associated nasopharyngeal carcinoma.	https://pubmed.ncbi.nlm.nih.gov/25126743/	8. INPP4B: Inositol polyphosphate-4-phosphatase type II, involved in phosphoinositide signaling and regulation of lipid metabolism.[22][23][24]	Nasopharyngeal carcinoma (NPC) is a common viral-associated neoplasm in which multiple signaling cascades are interfered with by Epstein-Bar virus (EBV) latent proteins and various genetic alterations. Aside from the previously reported PIK3CA amplification, we examined the role of INPP4B, a negative regulator of the PI3K/AKT signaling pathway in the development of NPC. By RT-PCR and Western blot…	1	1	Diff. expressed gene set	ANDROGEN RESPONSE
[1] Ganapathy, Ashwinkumar Subramenium, Saha, Kushal, Suchanec, Eric, Singh, Vikash, Verma, Aayush, Yochum, Gregory, Koltun, Walter, Nighot, Meghali, Ma, Thomas, Nighot, Prashant. "AP2M1 mediates autophagy-induced CLDN2 (claudin 2) degradation through endocytosis and interaction with LC3 and reduces intestinal epithelial tight junction permeability." Autophagy, 2022, pp. 2086-2103.	AP2M1 mediates autophagy-induced CLDN2 (claudin 2) degradation through endocytosis and interaction with LC3 and reduces intestinal epithelial tight junction permeability.	https://pubmed.ncbi.nlm.nih.gov/34964704/	1. Endocytic and exocytic pathways: Many proteins in this system, such as AP2B1, AP2M1, AP2S1, CLTA, CLTC, DNM1L, EGFR, and VAMP3, are involved in endocytosis and exocytosis. These processes are responsible for the internalization of extracellular material and the release of intracellular material, respectively. Endocytosis and exocytosis are essential for maintaining cellular homeostasis and res…	The intestinal epithelial tight junctions (TJs) provide barrier against paracellular permeation of lumenal antigens. Defects in TJ barrier such as increased levels of pore-forming TJ protein CLDN2 (claudin-2) is associated with inflammatory bowel disease. We have previously reported that starvation-induced macroautophagy/autophagy enhances the TJ barrier by degrading pore-forming CLDN2. In this s…	1	1	Diff. expressed gene set	PROTEIN SECRETION
[1] Chen, Junru, Ding, Chaofeng, Chen, Yunhao, Hu, Wendi, Yu, Chengkuan, Peng, Chuanhui, Feng, Xiaode, Cheng, Qiyang, Wu, Wenxuan, Lu, Yuejie, Xie, Haiyang, Zhou, Lin, Wu, Jian, Zheng, Shusen. "ACSL4 reprograms fatty acid metabolism in hepatocellular carcinoma via c-Myc/SREBP1 pathway." Cancer letters, 2021, pp. 154-165.	ACSL4 reprograms fatty acid metabolism in hepatocellular carcinoma via c-Myc/SREBP1 pathway.	https://pubmed.ncbi.nlm.nih.gov/33340617/	1. Presence of key enzymes in fatty acid metabolism: The system includes proteins such as ACSL1, ACSL4, ACSL5 (acyl-CoA synthetases), ACADM, ACADS, ACADVL (acyl-CoA dehydrogenases), and CPT1A, CPT2 (carnitine palmitoyltransferases), which are crucial for fatty acid activation, beta-oxidation, and transport into mitochondria.[1][2][3]	Lipid metabolic reprogramming plays a pivotal role in hepatocellular carcinoma (HCC) development, but the underlying mechanisms are incompletely characterized. Long chain acyl CoA synthetase 4 (ACSL4), a member of acyl-CoA synthetases (ACS) family, has been identified as a novel marker of alpha-fetoprotein-high subtype HCC and as an oncogene. Here, we identified a new function of ACSL4 in HCC lip…	1	1	Diff. expressed gene set	FATTY ACID METABOLISM
[18] Cai, Xun, Liu, Chuan, Zhang, Tie-Ning, Zhu, Yi-Wen, Dong, Xiao, Xue, Peng. "Down-regulation of FN1 inhibits colorectal carcinogenesis by suppressing proliferation, migration, and invasion." Journal of cellular biochemistry, 2018, pp. 4717-4728.	Down-regulation of FN1 inhibits colorectal carcinogenesis by suppressing proliferation, migration, and invasion.	https://pubmed.ncbi.nlm.nih.gov/29274284/	6. Cell adhesion and migration: Proteins like ITGAM, FN1, and CDH13 are involved in cell adhesion and migration, which are crucial for the movement of immune cells to the site of infection or injury.[16][17][18]	Fibronectin 1 (FN1) is involved in cell adhesion and migration processes including embryogenesis, wound healing, blood coagulation, host defense, metastasis, and implicated in various biochemical processes. However, its effects on the development and progression of human cancer, especially colorectal cancer (CRC), are unclear. To evaluate the relationship between the expression of FN1 and the his…	1	1	Diff. expressed gene set	COMPLEMENT
[55] Heck-Swain, Ka Lin, Li, Jiwen, Ruan, Wei, Yuan, Xiaoyi, Wang, Yanyu, Koeppen, Michael, Eltzschig, Holger K. "Myeloid hypoxia-inducible factor HIF1A provides cardio-protection during ischemia and reperfusion <i>via</i> induction of netrin-1." Frontiers in cardiovascular medicine, 2022, pp. 970415.	Myeloid hypoxia-inducible factor HIF1A provides cardio-protection during ischemia and reperfusion via induction of netrin-1.	https://pubmed.ncbi.nlm.nih.gov/36247475/	5. HIF1A is a hypoxia-inducible factor that regulates cellular response to low oxygen levels.[55][56][57]	The transcription factor hypoxia-inducible factor HIF1A induces cardioprotection from ischemia and reperfusion injury. Here, we investigate tissue-specific pathways that are critical for HIF1A-elicited tissue protection. Initial studies showed that mice with induced global Hif1a deletion (Hif1aloxP/loxP UbiquitinCre+) have exaggerated myocardial injury during in situ ischemia and reperfusion. Sur…	1	1	Diff. expressed gene set	HYPOXIA
[26] Mlakar, Simona Jurkovic, Osredkar, Josko, Prezelj, Janez, Marc, Janja. "Antioxidant enzymes GSR, SOD1, SOD2, and CAT gene variants and bone mineral density values in postmenopausal women: a genetic association analysis." Menopause (New York, N.Y.), 2012, pp. 368-76.	Antioxidant enzymes GSR, SOD1, SOD2, and CAT gene variants and bone mineral density values in postmenopausal women: a genetic association analysis.	https://pubmed.ncbi.nlm.nih.gov/22089180/	9. CAT, SOD1, and PRDX5 are antioxidant enzymes that protect cells from oxidative damage, which can be caused by the accumulation of lipid peroxides during lipid metabolism.[25][26][27]	Oxidative stress participates in decreasing bone formation and stimulating bone resorption. Furthermore, antioxidant enzymes have been observed to have low protective activity in women with osteoporosis.The aim of the present study was to examine any association of selected gene polymorphisms of the glutathione S-reductase (GSR), superoxide dismutase (SOD1 and SOD2), and catalase (CAT) genes, alo…	1	1	Diff. expressed gene set	BILE ACID METABOLISM
[8] Liu, Baohui, Dong, Huimin, Lin, Xi, Yang, Xiangsheng, Yue, Xiaojing, Yang, Jian, Li, Yuntao, Wu, Liquan, Zhu, Xiaonan, Zhang, Shenqi, Tian, Daofeng, Wang, Junmin, Cai, Qiang, Mao, Shanping, Chen, Qianxue, Chang, Jiang. "RND3 promotes Snail 1 protein degradation and inhibits glioblastoma cell migration and invasion." Oncotarget, 2016, pp. 82411-82423.	RND3 promotes Snail 1 protein degradation and inhibits glioblastoma cell migration and invasion.	https://pubmed.ncbi.nlm.nih.gov/27705942/	3. Cell adhesion and migration: Integrins, such as ITGB3, are transmembrane receptors that mediate cell adhesion to the ECM and regulate cell migration. Additionally, proteins like VAV2, RASA2, and RND3 are involved in the regulation of cell adhesion and migration through their roles in cytoskeletal organization and signaling pathways.[7][8][9]	Activation of Snail1 signaling promotes the migration and invasion of multiple tumors, including glioblastoma multiforme (GBM). However, the molecular mechanism that augments Snail1 signaling during GBM cell migration and invasion remains largely unknown. Identification of the factors that regulate Snail1 signaling is critical to block tumor cell migration and invasion. By screening human GBM spe…	0	1	Diff. expressed gene set	UV RESPONSE DN
[14] Qiu, Zhiyuan, Wang, Yan, Zhang, Zhao, Qin, Rong, Peng, Yong, Tang, Weifeng, Xi, Yan, Tian, Guangyu, Zhang, Yeqing. "Roles of intercellular cell adhesion molecule-1 (ICAM-1) in colorectal cancer: expression, functions, prognosis, tumorigenesis, polymorphisms and therapeutic implications." Frontiers in oncology, 2022, pp. 1052672.	Roles of intercellular cell adhesion molecule-1 (ICAM-1) in colorectal cancer: expression, functions, prognosis, tumorigenesis, polymorphisms and therapeutic implications.	https://pubmed.ncbi.nlm.nih.gov/36505809/	5. Cell adhesion and migration: Proteins such as ICAM1, VCAM1, and SELP are involved in cell adhesion and migration, which are essential processes for immune cell trafficking and recruitment to sites of infection or inflammation.[13][14][15]	Colorectal cancer (CRC) is a major global health problem and one of the major causes of cancer-related death worldwide. It is very important to understand the pathogenesis of CRC for early diagnosis, prevention strategies and identification of new therapeutic targets. Intercellular adhesion molecule-1 (ICAM-1, CD54) displays an important role in the the pathogenesis of CRC. It is a cell surface g…	1	1	Diff. expressed gene set	INTERFERON GAMMA RESPONSE
[16] Liu, Guoyou, Wang, Lei, Wess, Jürgen, Dean, Ann. "Enhancer looping protein LDB1 regulates hepatocyte gene expression by cooperating with liver transcription factors." Nucleic acids research, 2022, pp. 9195-9211.	Enhancer looping protein LDB1 regulates hepatocyte gene expression by cooperating with liver transcription factors.	https://pubmed.ncbi.nlm.nih.gov/36018801/	6. Regulation of gene expression: Proteins like LDB1 and ETS2 are involved in the regulation of gene expression, which is crucial for the proper functioning of neurons. These proteins help modulate the transcription of genes involved in various aspects of neuronal development and function.[16][17][18]	Enhancers establish proximity with distant target genes to regulate temporospatial gene expression and specify cell identity. Lim domain binding protein 1 (LDB1) is a conserved and widely expressed protein that functions as an enhancer looping factor. Previous studies in erythroid cells and neuronal cells showed that LDB1 forms protein complexes with different transcription factors to regulate ce…	0	1	Diff. expressed gene set	HEDGEHOG SIGNALING
[4] Zegeye, Mulugeta M, Lindkvist, Madelene, Fälker, Knut, Kumawat, Ashok K, Paramel, Geena, Grenegård, Magnus, Sirsjö, Allan, Ljungberg, Liza U. "Activation of the JAK/STAT3 and PI3K/AKT pathways are crucial for IL-6 trans-signaling-mediated pro-inflammatory response in human vascular endothelial cells." Cell communication and signaling : CCS, 2018, pp. 55.	Activation of the JAK/STAT3 and PI3K/AKT pathways are crucial for IL-6 trans-signaling-mediated pro-inflammatory response in human vascular endothelial cells.	https://pubmed.ncbi.nlm.nih.gov/30185178/	- IL1A, IL1B, IL6, IL12B, IL18, IL23A, and TNF are cytokines that mediate inflammatory response and regulate immune cell functions.[4][5][6]	IL-6 classic signaling is linked to anti-inflammatory functions while the trans-signaling is associated with pro-inflammatory responses. Classic signaling is induced via membrane-bound IL-6 receptor (IL-6R) whereas trans-signaling requires prior binding of IL-6 to the soluble IL-6R. In both cases, association with the signal transducing gp130 receptor is compulsory. However, differences in the do…	1	1	Diff. expressed gene set	TNFA SIGNALING VIA NFKB
[15] Kortlever, Roderik M, Sodir, Nicole M, Wilson, Catherine H, Burkhart, Deborah L, Pellegrinet, Luca, Brown Swigart, Lamorna, Littlewood, Trevor D, Evan, Gerard I. "Myc Cooperates with Ras by Programming Inflammation and Immune Suppression." Cell, 2017, pp. 1301-1315.e14.	Myc Cooperates with Ras by Programming Inflammation and Immune Suppression.	https://pubmed.ncbi.nlm.nih.gov/29195074/	5. Involvement of transcription factors: IRF1, IRF7, MYC, NFKB1, and RELA are transcription factors that regulate the expression of genes involved in immune responses and inflammation.[13][14][15]	The two oncogenes KRas and Myc cooperate to drive tumorigenesis, but the mechanism underlying this remains unclear. In a mouse lung model of KRasG12D-driven adenomas, we find that co-activation of Myc drives the immediate transition to highly proliferative and invasive adenocarcinomas marked by highly inflammatory, angiogenic, and immune-suppressed stroma. We identify epithelial-derived signaling…	1	1	Diff. expressed gene set	INFLAMMATORY RESPONSE
[1] Lu, Xiao-Yi, Shi, Xiong-Jie, Hu, Ao, Wang, Ju-Qiong, Ding, Yi, Jiang, Wei, Sun, Ming, Zhao, Xiaolu, Luo, Jie, Qi, Wei, Song, Bao-Liang. "Feeding induces cholesterol biosynthesis via the mTORC1-USP20-HMGCR axis." Nature, 2020, pp. 479-484.	Feeding induces cholesterol biosynthesis via the mTORC1-USP20-HMGCR axis.	https://pubmed.ncbi.nlm.nih.gov/33177714/	1. Cholesterol biosynthesis: Several proteins in the system are key enzymes in the cholesterol biosynthesis pathway, including HMGCR (3-hydroxy-3-methylglutaryl-CoA reductase), HMGCS1 (3-hydroxy-3-methylglutaryl-CoA synthase 1), DHCR24 (24-dehydrocholesterol reductase), DHCR7 (7-dehydrocholesterol reductase), and SQLE (squalene epoxidase). These proteins catalyze critical steps in the conversion …	Cholesterol is an essential lipid and its synthesis is nutritionally and energetically costly<sup>1,2</sup>. In mammals, cholesterol biosynthesis increases after feeding and is inhibited under fasting conditions<sup>3</sup>. However, the regulatory mechanisms of cholesterol biosynthesis at the fasting-feeding transition remain poorly understood. Here we show that the deubiquitylase ubiquitin-spec…	1	1	Diff. expressed gene set	MTORC1 SIGNALING
[11] Huang, Ziyang, Zhou, Jifan, Jiang, Yinyan, Han, Yixiang, Wang, Xiaofang, Li, Fanfan, Jiang, Songfu, Yu, Kang, Zhang, Shenghui. "Combined inhibition of XIAP and autophagy induces apoptosis and differentiation in acute myeloid leukaemia." Journal of cellular and molecular medicine, 2023, pp. 1682-1696.	Combined inhibition of XIAP and autophagy induces apoptosis and differentiation in acute myeloid leukaemia.	https://pubmed.ncbi.nlm.nih.gov/37154878/	4. Inhibitors of apoptosis proteins (IAPs): XIAP and BIRC3 are IAPs that inhibit caspases and promote cell survival. They are regulated by proteins such as DIABLO and SMAC, which are released from the mitochondria during apoptosis and bind to IAPs, preventing their inhibitory action on caspases.[10][11][12]	Perturbations in autophagy, apoptosis and differentiation have greatly affected the progression and therapy of acute myeloid leukaemia (AML). The role of X-linked inhibitor of apoptosis (XIAP)-related autophagy remains unclear in AML therapeutics. Here, we found that XIAP was highly expressed and associated with poor overall survival in patients with AML. Furthermore, pharmacologic inhibition of …	0	1	Diff. expressed gene set	APOPTOSIS
[2] Kakuda, Shinako, LoPilato, Rachel K, Ito, Atsuko, Haltiwanger, Robert S. "Canonical Notch ligands and Fringes have distinct effects on NOTCH1 and NOTCH2." The Journal of biological chemistry, 2020, pp. 14710-14722.	Canonical Notch ligands and Fringes have distinct effects on NOTCH1 and NOTCH2.	https://pubmed.ncbi.nlm.nih.gov/32820046/	1. Notch Receptors and Ligands: NOTCH1, NOTCH2, and NOTCH3 are transmembrane receptors that interact with membrane-bound ligands, such as JAG1 and DLL1. LFNG is a glycosyltransferase that modifies Notch receptors, affecting their ability to bind ligands.[1][2][3]	Notch signaling is a cellular pathway regulating cell-fate determination and adult tissue homeostasis. Little is known about how canonical Notch ligands or Fringe enzymes differentially affect NOTCH1 and NOTCH2. Using cell-based Notch signaling and ligand-binding assays, we evaluated differences in NOTCH1 and NOTCH2 responses to Delta-like (DLL) and Jagged (JAG) family members and the extent to w…	0	1	Diff. expressed gene set	NOTCH SIGNALING
[3] Zhang, Yingchi, Zhang, Jingliao, An, Wenbin, Wan, Yang, Ma, Shihui, Yin, Jie, Li, Xichuan, Gao, Jie, Yuan, Weiping, Guo, Ye, Engel, James Douglas, Shi, Lihong, Cheng, Tao, Zhu, Xiaofan. "Intron 1 GATA site enhances ALAS2 expression indispensably during erythroid differentiation." Nucleic acids research, 2017, pp. 657-671.	Intron 1 GATA site enhances ALAS2 expression indispensably during erythroid differentiation.	https://pubmed.ncbi.nlm.nih.gov/28123038/	1. GATA1: A transcription factor that regulates the expression of genes involved in RBC development, such as HBB, HBD, and ALAS2. GATA1 is crucial for the differentiation of erythroid progenitor cells into mature RBCs.[1][2][3]	The first intronic mutations in the intron 1 GATA site (int-1-GATA) of 5-aminolevulinate synthase 2 (ALAS2) have been identified in X-linked sideroblastic anemia (XLSA) pedigrees, strongly suggesting it could be causal mutations of XLSA. However, the function of this int-1-GATA site during in vivo development remains largely unknown. Here, we generated mice lacking a 13 bp fragment, including thi…	1	1	Diff. expressed gene set	HEME METABOLISM
[7] Wang, Wei, Subramani, Suresh. "Role of PEX5 ubiquitination in maintaining peroxisome dynamics and homeostasis." Cell cycle (Georgetown, Tex.), 2017, pp. 2037-2045.	Role of PEX5 ubiquitination in maintaining peroxisome dynamics and homeostasis.	https://pubmed.ncbi.nlm.nih.gov/29753736/	2. PEX2, PEX10, and PEX12: These proteins function as E3 ubiquitin ligases and are involved in the ubiquitination of PEX5, which is necessary for its recycling. Mutations in these genes can also result in peroxisome biogenesis disorders.[7][8][9]	Peroxisomes are dynamic and multifunctional organelles involved in various cellular metabolic processes, and their numbers are tightly regulated by pexophagy, a selective degradation of peroxisomes through autophagy to maintain peroxisome homeostasis in cells. Catalase, a major peroxisome protein, plays a critical role in removing peroxisome-generated reactive oxygen species (ROS) produced by per…	1	1	Diff. expressed gene set	peroxisome	1
[4] Huang, Haili, Liang, Ling, Sun, Dan, Li, Jin, Wang, Wentao, Zha, Lixia, Yang, Jiaqi, Pan, Kunyan, Fan, Xianmou, He, Chengzhang, Tang, Xudong, Zhang, Peihua. "Rab37 Promotes Endothelial Differentiation and Accelerates ADSC-Mediated Diabetic Wound Healing through Regulating Secretion of Hsp90α and TIMP1." Stem cell reviews and reports, 2023, pp. 1019-1033.	Rab37 Promotes Endothelial Differentiation and Accelerates ADSC-Mediated Diabetic Wound Healing through Regulating Secretion of Hsp90α and TIMP1.	https://pubmed.ncbi.nlm.nih.gov/36627432/	2. ECM degradation and remodeling: Proteins like TIMP1, which inhibits matrix metalloproteinases, and SERPINA5, a serine protease inhibitor, play roles in controlling ECM degradation and turnover. This regulation is essential for maintaining tissue homeostasis and enabling cellular processes like wound healing and tissue repair.[4][5][6]	Accumulating evidence indicates that adipose tissue-derived mesenchymal stem cells (ADSCs) are an effective treatment for diabetic refractory wounds. However, the application of ADSCs to diabetic wounds is still limited, indicating that we still lack sufficient knowledge regarding regulators/mediators of ADSCs during wound healing. Rab37, a member of RabGTPase, may function as regulator of vesicl…	1	1	Diff. expressed gene set	ANGIOGENESIS
[9] Girard, D, Senécal, J L. "Characterization of a novel human IgG antibody reactive with a Ca(2+)-sensitive cell-cell adhesion epitope of PtK2 epithelial cells." Autoimmunity, 1995, pp. 237-45.	Characterization of a novel human IgG antibody reactive with a Ca(2+)-sensitive cell-cell adhesion epitope of PtK2 epithelial cells.	https://pubmed.ncbi.nlm.nih.gov/7578886/	3. Cell adhesion and migration: Proteins such as ITGAV, an integrin subunit, and PTK2, a focal adhesion kinase, are involved in cell adhesion and migration. These proteins facilitate cell-ECM interactions and enable cells to respond to changes in the ECM.[7][8][9]	We have characterized a human IgG antibody present in the serum of a patient with an autoimmune undifferentiated connective tissue disease and reactive with PtK2 epithelial cell-cell adhesions. The fluorescent staining pattern is observed only at cell-cell contacts whether cells are permeabilized or not. The serum reacts with polypeptides of 90, 48 and 45 kD by immunoblotting. IgG affinity-purifi…	0	1	Diff. expressed gene set	ANGIOGENESIS
[2] Hu, Shu-Ting, Li, Xin-Yu, Chen, Han, Xu, Lyu-Hong, Fang, Jian-Pei. "[Knockdown of ALAS2 Affects Erythroid Differentiation by Down-regulating Mitophagy Receptor BNIP3L]." Zhongguo shi yan xue ye xue za zhi, 2020, pp. 1710-1717.	[Knockdown of ALAS2 Affects Erythroid Differentiation by Down-regulating Mitophagy Receptor BNIP3L].	https://pubmed.ncbi.nlm.nih.gov/33067979/	1. GATA1: A transcription factor that regulates the expression of genes involved in RBC development, such as HBB, HBD, and ALAS2. GATA1 is crucial for the differentiation of erythroid progenitor cells into mature RBCs.[1][2][3]	AbstractObjective: To investigate the effect of ALAS2 downregulation on the expression of BNIP3L and erythroid differentiation in K562 cells.	1	1	Diff. expressed gene set	HEME METABOLISM
[49] Bi, Guoshu, Liang, Jiaqi, Zhao, Mengnan, Zhang, Huan, Jin, Xing, Lu, Tao, Zheng, Yuansheng, Bian, Yunyi, Chen, Zhencong, Huang, Yiwei, Besskaya, Valeria, Zhan, Cheng, Wang, Qun, Tan, Lijie. "miR-6077 promotes cisplatin/pemetrexed resistance in lung adenocarcinoma via CDKN1A/cell cycle arrest and KEAP1/ferroptosis pathways." Molecular therapy. Nucleic acids, 2022, pp. 366-386.	miR-6077 promotes cisplatin/pemetrexed resistance in lung adenocarcinoma via CDKN1A/cell cycle arrest and KEAP1/ferroptosis pathways.	https://pubmed.ncbi.nlm.nih.gov/35505963/	3. CDKN1A, CDKN1B, and CDKN1C are cyclin-dependent kinase inhibitors that regulate cell cycle progression.[49][50][51]	Lung adenocarcinoma (LUAD) is one of the most common malignancies worldwide. Combination chemotherapy with cisplatin (CDDP) plus pemetrexed (PEM) remains the predominant therapeutic regimen; however, chemoresistance greatly limits its curative potential. Here, through CRISPR-Cas9 screening, we identified miR-6077 as a key driver of CDDP/PEM resistance in LUAD. Functional experiments verified that…	1	1	Diff. expressed gene set	HYPOXIA
[8] Sims, M A, Field, S D, Barnes, M R, Shaikh, N, Ellington, K, Murphy, K E, Spurr, N, Campbell, D A. "Cloning and characterisation of ITGAV, the genomic sequence for human cell adhesion protein (vitronectin) receptor alpha subunit, CD51." Cytogenetics and cell genetics, 2000, pp. 268-71.	Cloning and characterisation of ITGAV, the genomic sequence for human cell adhesion protein (vitronectin) receptor alpha subunit, CD51.	https://pubmed.ncbi.nlm.nih.gov/10965141/	3. Cell adhesion and migration: Proteins such as ITGAV, an integrin subunit, and PTK2, a focal adhesion kinase, are involved in cell adhesion and migration. These proteins facilitate cell-ECM interactions and enable cells to respond to changes in the ECM.[7][8][9]	The integrin family of receptors serves as major receptors for extracellular matrix-mediated cell adhesion and migration, cytoskeletal organisation, cell proliferation, survival, and differentiation. The alpha-V integrins consist of a subset which share a common alpha-V subunit combined with one of five beta subunits (beta-1, 3, 5, 6, or 8). The alpha-V integrins have been implicated in a number …	0	1	Diff. expressed gene set	ANGIOGENESIS
[2] Taniuchi, Keisuke, Furihata, Mutsuo, Naganuma, Seiji, Saibara, Toshiji. "WAVE2 is associated with poor prognosis in pancreatic cancers and promotes cell motility and invasiveness via binding to ACTN4." Cancer medicine, 2018, pp. 5733-5751.	WAVE2 is associated with poor prognosis in pancreatic cancers and promotes cell motility and invasiveness via binding to ACTN4.	https://pubmed.ncbi.nlm.nih.gov/30353690/	1. Actin-binding proteins: ACTN4, CAPZB, FSCN1, and GSN regulate actin filament organization and dynamics, contributing to cell shape, motility, and adhesion.[1][2][3]	WAVE2 is a member of the WASP/WAVE family of actin cytoskeletal regulatory proteins; unfortunately, little is known about its function in pancreatic cancers. In this study, we report the role of WAVE2 in the motility and invasiveness of pancreatic cancer cells. High WAVE2 expression in human pancreatic cancer tissues was correlated with overall survival. WAVE2 accumulated in the cell protrusions …	1	1	Diff. expressed gene set	MITOTIC SPINDLE
[3] Nagata, S. "Fas ligand-induced apoptosis." Annual review of genetics, 1999, pp. 29-55.	Fas ligand-induced apoptosis.	https://pubmed.ncbi.nlm.nih.gov/36629505/	1. Apoptosis induction: FAS, TNF, and TNFRSF9 are cell surface receptors that can initiate apoptosis upon ligand binding. CASP8 is a key initiator caspase in the extrinsic apoptosis pathway, activated by FAS and TNF signaling. TP53 is a tumor suppressor protein that can induce apoptosis in response to DNA damage.[1][2][3]	The role of CD95/Fas ligand (CD95L/FasL) in the induction of CD95-mediated extrinsic apoptosis is well characterized. Trimerized, membrane-bound CD95L ligates the CD95 receptor activating downstream signaling resulting in the execution of cells by caspase proteins. However, the expression of CD95L has been reported to induce cell death in contexts in which this pathway is unlikely to be activated…	1	1	NeST	TNFR/Traf signaling
[17] Khalid, Ahmed Magzoub, Asano, Atsushi, Hosaka, Yoshinao Z, Takeuchi, Takashi, Yamano, Yoshiaki. "Tumor suppressor candidate TUSC3 expression during rat testis maturation." Bioscience, biotechnology, and biochemistry, 2013, pp. 2019-24.	Tumor suppressor candidate TUSC3 expression during rat testis maturation.	https://pubmed.ncbi.nlm.nih.gov/24096664/	6. TUSC3 (Tumor Suppressor Candidate 3) is a protein with potential tumor suppressor functions. It has been reported to interact with EGFR, affecting its stability and signaling, and may play a role in the regulation of cell proliferation and tumorigenesis.[16][17][18]	Analysis of microarray data obtained by comparing gene expression between 2-week-old infant and 7-week-old mature SD rat testes revealed novel targets involved in tumor suppression. Reverse-transcription polymerase chain reaction and Northern blotting indicated that Tusc3 gene expression was upregulated in the normal maturing testis and prostate and other organs such as the cerebrum and ovary. Tu…	1	1	NeST	Endoplasmic Reticulum protein processing
[12] Yoon, Sarah, Choi, Ji-Hye, Kim, Sung Joo, Lee, Eun-Ju, Shah, Masaud, Choi, Sangdun, Woo, Hyun Goo. "EPHB6 mutation induces cell adhesion-mediated paclitaxel resistance via EPHA2 and CDH11 expression." Experimental & molecular medicine, 2019, pp. 1-12.	EPHB6 mutation induces cell adhesion-mediated paclitaxel resistance via EPHA2 and CDH11 expression.	https://pubmed.ncbi.nlm.nih.gov/31160603/	In conclusion, the primary biological process performed by this system of interacting proteins is Ephrin receptor signaling, which is crucial for cell adhesion, migration, and axon guidance. The proteins EPHA2, EPHA3, EPHA5, EPHA7, EPHB1, EPHB2, PTPRD, and SLIT2 all play essential roles in this process, with PTPRD and SLIT2 modulating the signaling of Ephrin receptors.[10][11][12]	Mutations affect gene functions related to cancer behavior, including cell growth, metastasis, and drug responses. Genome-wide profiling of cancer mutations and drug responses has identified actionable targets that can be utilized for the management of cancer patients. Here, the recapitulation of pharmacogenomic data revealed that the mutation of EPHB6 is associated with paclitaxel resistance in …	1	1	NeST	Cell projection morphogenesis
[4] Shin, Jihoon, Kim, Tae Wan, Kim, Hyunsoo, Kim, Hye Ji, Suh, Min Young, Lee, Sangho, Lee, Han-Teo, Kwak, Sojung, Lee, Sang-Eun, Lee, Jong-Hyuk, Jang, Hyonchol, Cho, Eun-Jung, Youn, Hong-Duk. "Aurkb/PP1-mediated resetting of Oct4 during the cell cycle determines the identity of embryonic stem cells." eLife, 2016, pp. e10877.	Aurkb/PP1-mediated resetting of Oct4 during the cell cycle determines the identity of embryonic stem cells.	https://pubmed.ncbi.nlm.nih.gov/26880562/	1. Cell cycle regulation: AURKB and CCND1 play crucial roles in cell cycle progression. AURKB is a serine/threonine kinase involved in mitosis and chromosome segregation, while CCND1 is a cyclin that regulates the G1-S phase transition. Their interaction suggests a coordinated regulation of cell cycle progression.[4][5][6]	Pluripotency transcription programs by core transcription factors (CTFs) might be reset during M/G1 transition to maintain the pluripotency of embryonic stem cells (ESCs). However, little is known about how CTFs are governed during cell cycle progression. Here, we demonstrate that the regulation of Oct4 by Aurora kinase b (Aurkb)/protein phosphatase 1 (PP1) during the cell cycle is important for …	0	1	NeST	Ubiquitin/Proteosome System
[19] Corpet, Armelle, Kleijwegt, Constance, Roubille, Simon, Juillard, Franceline, Jacquet, Karine, Texier, Pascale, Lomonte, Patrick. "PML nuclear bodies and chromatin dynamics: catch me if you can!" Nucleic acids research, 2020, pp. 11890-11912.	PML nuclear bodies and chromatin dynamics: catch me if you can!	https://pubmed.ncbi.nlm.nih.gov/33068409/	6. Nuclear Organization: PML is involved in the formation of nuclear bodies, which are involved in various cellular processes, including transcriptional regulation and DNA repair.[19][20][21]	Eukaryotic cells compartmentalize their internal milieu in order to achieve specific reactions in time and space. This organization in distinct compartments is essential to allow subcellular processing of regulatory signals and generate specific cellular responses. In the nucleus, genetic information is packaged in the form of chromatin, an organized and repeated nucleoprotein structure that is a…	1	1	NeST	Positive regulators of transcription
[1] Goel, Shom, DeCristo, Molly J, McAllister, Sandra S, Zhao, Jean J. "CDK4/6 Inhibition in Cancer: Beyond Cell Cycle Arrest." Trends in cell biology, 2018, pp. 911-925.	CDK4/6 Inhibition in Cancer: Beyond Cell Cycle Arrest.	https://pubmed.ncbi.nlm.nih.gov/33961012/	1. Cell cycle regulation: CDK4, CDK6, CDKN1A, CDKN1B, CDKN2A, CDKN2B, CDKN2C, CCND1, CCND2, CCND3, CCNE1, and CCNE2 are involved in cell cycle progression and regulation. CDKs (Cyclin-dependent kinases) and cyclins (CCND and CCNE) form complexes that regulate cell cycle progression, while CDKNs (Cyclin-dependent kinase inhibitors) negatively regulate the cell cycle.[1][2][3]	Dasatinib is a multi-target protein tyrosine kinase inhibitor. Due to its potent inhibition of Src, Abl, the platelet-derived growth factor receptor (PDGFR) family kinases, and other oncogenic kinases, it has been investigated as a targeted therapy for a broad spectrum of cancer types. However, its efficacy has not been significantly extended beyond leukemia. The mechanism of resistance to dasati…	0	1	NeST	Regulation of cellular homeostasis
[22] Qu, Xuan, Shen, Liangliang, Zheng, Yan, Cui, Yang, Feng, Zhihui, Liu, Feng, Liu, Jiankang. "A signal transduction pathway from TGF-β1 to SKP2 via Akt1 and c-Myc and its correlation with progression in human melanoma." The Journal of investigative dermatology, 2014, pp. 159-167.	A signal transduction pathway from TGF-β1 to SKP2 via Akt1 and c-Myc and its correlation with progression in human melanoma.	https://pubmed.ncbi.nlm.nih.gov/23792459/	8. Signal transduction: ABL1, AKT1, ARAF, BRAF, HRAS, KRAS, and RAF1 are involved in signal transduction pathways, such as the MAPK and PI3K-AKT pathways, which regulate cell proliferation, survival, and differentiation.[22][23][24]	Both SKP2 (S-phase kinase-associated protein 2) and transforming growth factor-β1 (TGF-β1) play important roles in cancer metastasis through different mechanisms: TGF-β1 via induction of epithelial-mesenchymal transition (EMT) and SKP2 via downregulating p27(kip1). Recent studies indicated that c-Myc and Akt1 were active players in metastasis. In this study we demonstrated a crosstalk between the…	1	1	NeST	Regulation of cellular homeostasis
[45] Komura, Kazumasa, Inamoto, Teruo, Tsujino, Takuya, Matsui, Yusuke, Konuma, Tsuyoshi, Nishimura, Kazuki, Uchimoto, Taizo, Tsutsumi, Takeshi, Matsunaga, Tomohisa, Maenosono, Ryoichi, Yoshikawa, Yuki, Taniguchi, Kohei, Tanaka, Tomohito, Uehara, Hirofumi, Hirata, Koichi, Hirano, Hajime, Nomi, Hayahito, Hirose, Yoshinobu, Ono, Fumihito, Azuma, Haruhito. "Increased BUB1B/BUBR1 expression contribut…	Increased BUB1B/BUBR1 expression contributes to aberrant DNA repair activity leading to resistance to DNA-damaging agents.	https://pubmed.ncbi.nlm.nih.gov/34545188/	- BUB1B phosphorylates and activates downstream targets to ensure proper chromosome alignment and segregation during mitosis.[43][44][45]	There has been accumulating evidence for the clinical benefit of chemoradiation therapy (CRT), whereas mechanisms in CRT-recurrent clones derived from the primary tumor are still elusive. Herein, we identified an aberrant BUB1B/BUBR1 expression in CRT-recurrent clones in bladder cancer (BC) by comprehensive proteomic analysis. CRT-recurrent BC cells exhibited a cell-cycle-independent upregulation…	0	1	NeST	Homologous recombination
[12] Nakagawa, Reiko, Naka, Tetsuji, Tsutsui, Hiroko, Fujimoto, Minoru, Kimura, Akihiro, Abe, Tatsuo, Seki, Ekihiro, Sato, Shintaro, Takeuchi, Osamu, Takeda, Kiyoshi, Akira, Shizuo, Yamanishi, Koichi, Kawase, Ichirou, Nakanishi, Kenji, Kishimoto, Tadamitsu. "SOCS-1 participates in negative regulation of LPS responses." Immunity, 2002, pp. 677-87.	SOCS-1 participates in negative regulation of LPS responses.	https://pubmed.ncbi.nlm.nih.gov/16287972/	4. Negative regulation: SOCS1 and PTPN11 are negative regulators of the JAK-STAT pathway. SOCS1 inhibits JAK kinase activity, while PTPN11 dephosphorylates and inactivates JAKs and STATs, ensuring controlled signaling.[10][11][12]	Suppressor of cytokine signaling-1 (SOCS-1) is one of the negative-feedback regulators of Janus kinase (JAK)-signal transducer and activator of transcription (STAT) signaling. We previously showed that SOCS-1 participates in LPS signaling, but it is not entirely clear yet how SOCS-1 suppresses LPS signaling. In this study, we demonstrate that SOCS-1 selectively inhibits LPS-induced IL-6 productio…	0	1	NeST	Lymphoid JAK/STAT signaling
