# Supplementary material for: Evaluation of large language models for discovery of gene set function
Source: Research Square preprint supplement (doi:10.21203/rs.3.rs-3270331/v1), 2023-09-18
Supplement: Supplementary file 3 [file 4865d57142eab63437967d72.xlsx]

## Sheet: Supplementary Table 2. Complete
DataSet	Human Name	NEST ID	GenesFixed	n_Genes	log2_n_Genes	GO term	GO ID	GSEA genes	n_overlap_GSEA	perc_overlap_GSEA	P-value	Adjusted P-value	LLM Name	LLM Analysis	n_overlap_LLM	perc_overlap_LLM	References	LLM_name_human_name_sim	GO_term_human_name_sim	winner	humanConsensus
NeST	Transcription regulation	NEST:10	ARID1A ARID1B ARID2 ATRX BARD1 BCL11B BCL7A BCLAF1 BRD4 CASP8 CDC73 CDK12 CHD2 CHD4 CREBBP CTCF CTNNB1 DDX3X DNMT1 DNMT3A DNMT3B E2F1 EMSY EP300 EWSR1 EZH2 FUBP1 FUS GATA3 HDAC1 HDAC2 HDAC3 HIST1H1E HIST3H3 ING1 IRF2 KDM5A KDM6A KMT2A KMT2B KMT2C KMT2D MAGI2 MDM2 MEN1 MTA1 MYC PALB2 PARP1 PBRM1 PHF6 PPP1CC PRCC PRDM1 PRKDC PRPF40B PTPN11 RAD21 RANBP2 RB1 RBM10 RSF1 RUNX1 SF1 SF3B1 SMARCA1 SMARCA4…	91	6.50779	Regulation Of Transcription By RNA Polymerase II	GO:0006357	RB1;DDX3X;SMARCB1;YEATS4;CHD4;PRDM1;CTCF;CHD2;TNF;PHF6;ING1;CDC73;SOX2;BCL7A;MYC;DNMT3B;EP300;ARID2;MEN1;PBRM1;PARP1;DNMT3A;ATRX;ARID1A;ARID1B;RUNX1;IRF2;TP53;KMT2D;HDAC2;HDAC3;KMT2A;HDAC1;PRKDC;KMT2C;GATA3;ZBTB2;BCLAF1;MTA1;RAD21;E2F1;SF3B1;BRD4;SMARCE1;SPEN;CREBBP;BCL11B;FUS;SMARCA1;SMARCA4;MDM2;ZNF217;CTNNB1;CDK12;TAF1;EZH2	56	61.5385	5.61e-33	6.78e-30	Chromatin Remodeling and DNA Repair	The primary biological process performed by this system of interacting proteins is chromatin remodeling and DNA repair. The proteins involved in this process play crucial roles in maintaining genomic stability and regulating gene expression. 1. Chromatin Remodeling: Several proteins in this system are part of the SWI/SNF family, including ARID1A, ARID1B, ARID2, SMARCA1, SMARCA4, SMARCB1, and SMAR…	63	69.2308	The primary biological process performed by this system of interacting proteins is chromatin remodeling and DNA repair. The proteins involved in this process play crucial roles in maintaining genomic stability and regulating gene expression. 1. Chromatin Remodeling: Several proteins in this system are part of the SWI/SNF family, including ARID1A, ARID1B, ARID2, SMARCA1, SMARCA4, SMARCB1, and SMAR…	0.436878	0.623511	GO	GO
NeST	Ubiquitin regulation of p53 activity	NEST:105	CUL3 ELOC FBXW7 HSP90AA1 MDM2 SKP1 STK11 TNF VHL	9	3.16993	Protein Modification By Small Protein Conjugation	GO:0032446	FBXW7;CUL3;MDM2;VHL;ELOC;SKP1	6	66.6667	2.8e-09	1.37e-06	Protein Degradation and Regulation	Protein Interaction: CUL3, ELOC, FBXW7, SKP1, and VHL are components of the Cullin-RING E3 ubiquitin ligase complex, which is involved in protein degradation. CUL3 serves as a scaffold protein, while ELOC and SKP1 are adaptor proteins. FBXW7 is a substrate recognition protein, and VHL is a substrate recognition component for hypoxia-inducible factor (HIF). HSP90AA1 is a molecular chaperone that a…	9	100	CUL3, ELOC, FBXW7, SKP1, and VHL are components of the Cullin-RING E3 ubiquitin ligase complex, which is involved in protein degradation. CUL3 serves as a scaffold protein, while ELOC and SKP1 are adaptor proteins. FBXW7 is a substrate recognition protein, and VHL is a substrate recognition component for hypoxia-inducible factor (HIF).[1][2][3] HSP90AA1 is a molecular chaperone that assists in pr…	0.438632	0.359502	LLM	LLM
NeST	Homologous recombination	NEST:130	BARD1 BLM BRCA1 BRCA2 BUB1B CHEK1 FANCD2 RAD51 RAD51C TOP2A TP53 WRN	12	3.58496	DNA Repair	GO:0006281	BARD1;BLM;WRN;RAD51C;RAD51;FANCD2;CHEK1;BRCA1;BRCA2;TP53	10	83.3333	2.34e-17	7.15e-15	DNA Repair and Stability	Proteins BARD1, BLM, BRCA1, BRCA2, BUB1B, CHEK1, FANCD2, RAD51, RAD51C, TOP2A, TP53, and WRN interact to maintain genomic stability and facilitate DNA repair. The primary biological process performed by this system is DNA repair and stability. 1. Homologous Recombination (HR) Repair: - BRCA1, BRCA2, RAD51, and RAD51C are key players in HR repair. - BRCA1 and BRCA2 facilitate RAD51 loading onto si…	12	100	Proteins BARD1, BLM, BRCA1, BRCA2, BUB1B, CHEK1, FANCD2, RAD51, RAD51C, TOP2A, TP53, and WRN interact to maintain genomic stability and facilitate DNA repair. The primary biological process performed by this system is DNA repair and stability.[1][2][3] - BRCA1, BRCA2, RAD51, and RAD51C are key players in HR repair.[4][5][6] - BRCA1 and BRCA2 facilitate RAD51 loading onto single-stranded DNA (ssDN…	0.578017	0.599835	Tied	Neither
NeST	Foxo signaling	NEST:168	AKT1 AR CDKN1B CREBBP EP300 FOXO3 RARA SMAD4 SMARCB1 VHL	10	3.32193	Positive Regulation Of Nucleic Acid-Templated Transcription	GO:1903508	CREBBP;SMAD4;RARA;EP300;AKT1;VHL;FOXO3	7	70	1.4e-09	6.43e-07	Cell Cycle Regulation	The system of interacting proteins AKT1, AR, CDKN1B, CREBBP, EP300, FOXO3, RARA, SMAD4, SMARCB1, and VHL primarily contributes to the regulation of the cell cycle. This analysis focuses on the critical roles these proteins play in cell cycle progression, growth, and differentiation. 1. AKT1: AKT1 is a serine/threonine kinase that plays a central role in cell survival and growth. It is activated b…	10	100	The system of interacting proteins AKT1, AR, CDKN1B, CREBBP, EP300, FOXO3, RARA, SMAD4, SMARCB1, and VHL primarily contributes to the regulation of the cell cycle. This analysis focuses on the critical roles these proteins play in cell cycle progression, growth, and differentiation.[1][2][3] 1. AKT1: AKT1 is a serine/threonine kinase that plays a central role in cell survival and growth. It is ac…	0.434419	0.236529	LLM	Neither
NeST	Neg Regulation EGFR	NEST:169	AKT1 CTNNB1 EGF EGFR NF2 PTEN	6	2.58496	Regulation Of Cell Population Proliferation	GO:0042127	EGF;PTEN;CTNNB1;AKT1;NF2;EGFR	6	100	3.1e-09	1.43e-06	PI3K/AKT Signaling	The primary biological process performed by this system of interacting proteins is the phosphatidylinositol 3-kinase (PI3K)/AKT signaling pathway. This pathway is crucial for regulating cell survival, growth, and proliferation. 1. EGF and EGFR interaction: EGF (epidermal growth factor) is a ligand that binds to its receptor, EGFR (epidermal growth factor receptor), activating the receptor's intri…	6	100	The primary biological process performed by this system of interacting proteins is the phosphatidylinositol 3-kinase (PI3K)/AKT signaling pathway. This pathway is crucial for regulating cell survival, growth, and proliferation.[1][2][3] 1. EGF and EGFR interaction: EGF (epidermal growth factor) is a ligand that binds to its receptor, EGFR (epidermal growth factor receptor), activating the recepto…	0.200165	0.265227	Neither	GO
NeST	p53 regulation of cell cycle	NEST:177	CDKN1A CREBBP EP300 RBL1 TP53	5	2.32193	Cellular Response To UV	GO:0034644	CREBBP;CDKN1A;EP300;TP53	4	80	1.12e-09	2.79e-07	Cell Cycle Regulation	Proteins: CDKN1A, CREBBP, EP300, RBL1, TP53 The primary biological process performed by this system of interacting proteins is the regulation of the cell cycle, particularly in response to DNA damage and cellular stress. The proteins involved in this process are CDKN1A, CREBBP, EP300, RBL1, and TP53. 1. CDKN1A (p21) - Cyclin-dependent kinase inhibitor 1A CDKN1A is a potent cyclin-dependent kinase…	5	100	Proteins: CDKN1A, CREBBP, EP300, RBL1, TP53 The primary biological process performed by this system of interacting proteins is the regulation of the cell cycle, particularly in response to DNA damage and cellular stress. The proteins involved in this process are CDKN1A, CREBBP, EP300, RBL1, and TP53.[1][2][3] 1. CDKN1A (p21) - Cyclin-dependent kinase inhibitor 1A[4][5][6] CDKN1A is a potent cycli…	0.715962	0.487017	LLM	LLM
NeST	Endoplasmic Reticulum protein processing	NEST:21	ARFRP1 CALR EGFR SEC23B TRAF3 TUSC3	6	2.58496	Positive Regulation Of Cell Cycle	GO:0045787	CALR;EGFR	2	33.3333	0.000155	0.0334143	EGFR-Mediated Signal Transduction	Proteins: ARFRP1, CALR, EGFR, SEC23B, TRAF3, TUSC3. 1. EGFR (Epidermal Growth Factor Receptor) is a receptor tyrosine kinase that plays a crucial role in cell proliferation, differentiation, and survival. It is activated by binding to its ligands, leading to receptor dimerization, autophosphorylation, and activation of downstream signaling pathways, such as the MAPK, PI3K/AKT, and JAK/STAT pathwa…	6	100	Proteins: ARFRP1, CALR, EGFR, SEC23B, TRAF3, TUSC3. 1. EGFR (Epidermal Growth Factor Receptor) is a receptor tyrosine kinase that plays a crucial role in cell proliferation, differentiation, and survival. It is activated by binding to its ligands, leading to receptor dimerization, autophosphorylation, and activation of downstream signaling pathways, such as the MAPK, PI3K/AKT, and JAK/STAT pathwa…	0.398441	0.210323	Neither	Neither
NeST	RAS-RAF-MAPK	NEST:212	ARAF BRAF HRAS KRAS MAP2K1 MAPK1 RAF1	7	2.80735	MAPK Cascade	GO:0000165	MAP2K1;MAPK1;BRAF;KRAS;HRAS	5	71.4286	5.31e-11	8.55e-09	MAPK/ERK Signaling Pathway	The system of interacting proteins ARAF, BRAF, HRAS, KRAS, MAP2K1, MAPK1, and RAF1 primarily participate in the Mitogen-Activated Protein Kinase/Extracellular signal-Regulated Kinase (MAPK/ERK) signaling pathway. This pathway is crucial for regulating cell proliferation, differentiation, and survival. 1. RAS GTPases (HRAS, KRAS): These proteins function as molecular switches, cycling between acti…	7	100	The system of interacting proteins ARAF, BRAF, HRAS, KRAS, MAP2K1, MAPK1, and RAF1 primarily participate in the Mitogen-Activated Protein Kinase/Extracellular signal-Regulated Kinase (MAPK/ERK) signaling pathway. This pathway is crucial for regulating cell proliferation, differentiation, and survival.[1][2][3] 1. RAS GTPases (HRAS, KRAS): These proteins function as molecular switches, cycling bet…	0.541558	0.580974	Tied	Tied
NeST	Regulation of cellular homeostasis	NEST:3	ABL1 ACVR1B AKT1 AMER1 ANKRD11 AR ARAF ARID1A ARID1B ARID2 ASNS ASXL1 ASXL2 ATIC ATM ATR ATRX AURKA AURKB AXIN2 BAP1 BARD1 BCL11B BCL2L12 BCL6 BCL7A BCLAF1 BCOR BCORL1 BLM BRAF BRCA1 BRCA2 BRD4 BRIP1 BTG1 BUB1B CASP8 CCDC6 CCND1 CCND2 CCND3 CCNE1 CCNE2 CDC25A CDC73 CDK12 CDK4 CDK5 CDK6 CDK8 CDKN1A CDKN1B CDKN1C CDKN2A CDKN2B CDKN2C CEP57 CHD2 CHD4 CHEK1 CHEK2 CIC CKS1B CREBBP CRKL CTC1 CTCF CTNNB…	323	8.33539	DNA Repair	GO:0006281	SETD2;MRE11;BRCA1;BRCA2;CHEK2;CHEK1;NBN;POLE;POLH;MEN1;PIAS4;UPF1;PARP1;ATRX;SMC1A;DDB2;RAD51B;MSH6;RAD51D;RAD51C;MSH2;FANCD2;MSH3;TP53;BLM;PRKDC;DOT1L;XPA;XPC;RECQL4;WRN;SLX4;MTA1;RAD21;POLD1;NSD2;PMS2;PMS1;MUTYH;BARD1;FANCI;NPM1;FANCM;MGMT;FANCL;XRCC2;XRCC3;FANCA;XRCC1;FANCC;FANCB;MLH1;FANCE;MLH3;FANCG;FANCF;MAD2L2;RAD52;RAD50;RAD51;ERCC3;ERCC4;UBE2T;ERCC1;ERCC2;ATM;ERCC5;ERCC6;ATR	69	21.3622	5.53e-61	1.25e-57	Cell Cycle Regulation and DNA Repair	The interacting proteins in this system are primarily involved in cell cycle regulation and DNA repair. Key proteins and their roles are as follows: 1. Cell cycle regulation: CDK4, CDK6, CDKN1A, CDKN1B, CDKN2A, CDKN2B, CDKN2C, CCND1, CCND2, CCND3, CCNE1, and CCNE2 are involved in cell cycle progression and regulation. CDKs (Cyclin-dependent kinases) and cyclins (CCND and CCNE) form complexes that…	62	19.195	The interacting proteins in this system are primarily involved in cell cycle regulation and DNA repair. Key proteins and their roles are as follows: 1. Cell cycle regulation: CDK4, CDK6, CDKN1A, CDKN1B, CDKN2A, CDKN2B, CDKN2C, CCND1, CCND2, CCND3, CCNE1, and CCNE2 are involved in cell cycle progression and regulation. CDKs (Cyclin-dependent kinases) and cyclins (CCND and CCNE) form complexes that…	0.592565	0.442702	LLM	Neither
NeST	ATM-independent DNA repair	NEST:30	AURKA AURKB BARD1 BLM BRCA1 BRCA2 BRIP1 BUB1B CCNE1 CDKN1A CDKN1B CHEK1 CKS1B FANCD2 MKI67 MLH1 MLH3 MSH2 MSH3 MSH6 PMS1 PMS2 POLD1 POLE RAD51 RAD51C RB1 TERT TOP2A TP53 WRN XRCC2	32	5	DNA Repair	GO:0006281	BARD1;BLM;XRCC2;BRCA1;MLH1;BRCA2;MLH3;MSH6;WRN;RAD51C;RAD51;MSH2;MSH3;FANCD2;POLD1;CHEK1;PMS2;TP53;POLE;PMS1	20	62.5	1.8e-29	8.97e-27	DNA Damage Response and Repair	The primary biological process performed by this system of interacting proteins is DNA damage response and repair. The proteins involved in this process work together to maintain genomic stability and prevent the accumulation of mutations that could lead to diseases such as cancer. 1. DNA repair and homologous recombination: Proteins such as BRCA1, BRCA2, RAD51, RAD51C, and XRCC2 are involved in …	31	96.875	The primary biological process performed by this system of interacting proteins is DNA damage response and repair. The proteins involved in this process work together to maintain genomic stability and prevent the accumulation of mutations that could lead to diseases such as cancer. 1. DNA repair and homologous recombination: Proteins such as BRCA1, BRCA2, RAD51, RAD51C, and XRCC2 are involved in …	0.740402	0.668714	LLM	Tied
NeST	Ubiquitin/Proteosome System	NEST:32	AURKB CCND1 CUL3 DDB2 ELOC ETV4 ETV5 FBXO11 FBXW7 HSP90AA1 MDM2 NF2 PARK2 PRAME RIT1 SKP1 STK11 TET2 TNF TP53 VHL	21	4.39232	Protein Ubiquitination	GO:0016567	FBXW7;CUL3;MDM2;PRAME;VHL;ELOC;FBXO11;DDB2;SKP1	9	42.8571	2.29e-10	1.46e-07	Cell Cycle Regulation and DNA Damage Response	The system of interacting proteins primarily involves cell cycle regulation, DNA damage response, and protein degradation. Key proteins in these processes include AURKB, CCND1, DDB2, MDM2, TP53, and VHL. 1. Cell cycle regulation: AURKB and CCND1 play crucial roles in cell cycle progression. AURKB is a serine/threonine kinase involved in mitosis and chromosome segregation, while CCND1 is a cyclin …	20	95.2381	The system of interacting proteins primarily involves cell cycle regulation, DNA damage response, and protein degradation. Key proteins in these processes include AURKB, CCND1, DDB2, MDM2, TP53, and VHL.[1][2][3] 1. Cell cycle regulation: AURKB and CCND1 play crucial roles in cell cycle progression. AURKB is a serine/threonine kinase involved in mitosis and chromosome segregation, while CCND1 is …	0.389606	0.654786	GO	GO
NeST	Histone modification	NEST:34	BARD1 BCL11B BRD4 CHD4 CREBBP DNMT1 DNMT3A DNMT3B E2F1 EMSY EZH2 HDAC1 HDAC2 HDAC3 HIST3H3 ING1 IRF2 KDM5A MTA1 PALB2 PARP1 PHF6 PRDM1 RB1 RUNX1 SMARCA1 TERT TP53 ZBTB2 ZNF217	30	4.90689	Negative Regulation Of Transcription By RNA Polymerase II	GO:0000122	RB1;CREBBP;HDAC2;HDAC3;PARP1;HDAC1;DNMT3A;CHD4;PRDM1;PHF6;ING1;RUNX1;ZBTB2;MTA1;IRF2;DNMT3B;E2F1;ZNF217;TP53;EZH2	20	66.6667	7.01e-22	3.51e-19	Epigenetic Regulation and DNA Repair	The primary biological process performed by this system of interacting proteins is epigenetic regulation and DNA repair. The proteins involved in this system play crucial roles in modulating gene expression, chromatin remodeling, and maintaining genomic stability. 1. Chromatin remodeling and histone modification: CHD4, SMARCA1, and ING1 are involved in chromatin remodeling, which is essential for…	30	100	The primary biological process performed by this system of interacting proteins is epigenetic regulation and DNA repair. The proteins involved in this system play crucial roles in modulating gene expression, chromatin remodeling, and maintaining genomic stability. 1. Chromatin remodeling and histone modification: CHD4, SMARCA1, and ING1 are involved in chromatin remodeling, which is essential for…	0.503865	0.250524	LLM	LLM
NeST	Nucleus	NEST:4	ANKRD11 AR ARID1A ARID1B ARID2 ASNS ASXL1 ASXL2 ATIC ATM ATR ATRX BAP1 BARD1 BCL11B BCL6 BCL7A BCLAF1 BCOR BCORL1 BRD4 CASP8 CCDC6 CDC73 CDK12 CDK8 CDKN1A CHD2 CHD4 CHEK2 CREBBP CTCF CTNNB1 CUL3 CUX1 DAXX DDX3X DIS3 DKC1 DNMT1 DNMT3A DNMT3B DOT1L E2F1 E2F6 EED ELOC EMSY EP300 ERCC2 ERCC3 ERCC5 ERCC6 ESR1 EWSR1 EZH2 FANCD2 FBXW7 FOXL2 FUBP1 FUS GATA1 GATA3 GPS2 GSTP1 H3F3A H3F3C HDAC1 HDAC2 HDAC3 …	194	7.59991	Regulation Of Transcription By RNA Polymerase II	GO:0006357	RB1;SMARCB1;YEATS4;PRDM1;TNF;SOX2;MYC;MYB;EP300;ARID2;MEN1;PIAS4;MED1;RUNX1;MYCL;MYCN;TBL1XR1;BCORL1;TP53;KMT2D;KMT2A;PRKDC;MAX;KMT2C;GATA3;GATA1;ZBTB2;PCBP1;RAD21;SMAD2;CREBBP;BCL11B;FUS;SMARCA1;ESR1;SMARCA4;BCL6;REL;MDM2;ATM;MDM4;CDK12;TCF3;EZH2;DDX3X;CHD4;CTCF;CHD2;PHF6;ING1;CDC73;MED12;BCL7A;DNMT3B;ELOC;HRAS;PELP1;PBRM1;PARP1;EED;NCOA3;DNMT3A;ATRX;FOXL2;ARID1A;ARID1B;NCOR2;NCOR1;TFDP1;IRF2;RA…	98	50.5155	3.94e-46	7.15e-43	DNA Damage Response and Repair	The primary biological process performed by this system of interacting proteins is DNA damage response and repair. This is evident from the presence of several key proteins involved in these processes, such as ATM, ATR, ATRX, BARD1, BRD4, CASP8, CDC73, CDK12, CDKN1A, CHEK2, CREBBP, CTCF, DAXX, DDX3X, DNMT1, DNMT3A, DNMT3B, DOT1L, ERCC2, ERCC3, ERCC5, ERCC6, FANCD2, HDAC1, HDAC2, HDAC3, HDAC4, HDA…	139	71.6495	The primary biological process performed by this system of interacting proteins is DNA damage response and repair. This is evident from the presence of several key proteins involved in these processes, such as ATM, ATR, ATRX, BARD1, BRD4, CASP8, CDC73, CDK12, CDKN1A, CHEK2, CREBBP, CTCF, DAXX, DDX3X, DNMT1, DNMT3A, DNMT3B, DOT1L, ERCC2, ERCC3, ERCC5, ERCC6, FANCD2, HDAC1, HDAC2, HDAC3, HDAC4, HDA…	0.398268	0.23219	Neither	Neither
NeST	Apoptosis Regulation	NEST:47	BCL2 BCL2L1 BCL2L11 BCL2L2 CASP8 FAS IFNGR1 MCL1 MS4A1 PARP1 PTPN13 TBX3 TP53	13	3.70044	Extrinsic Apoptotic Signaling Pathway In Absence Of Ligand	GO:0097192	BCL2;FAS;BCL2L2;BCL2L1;MCL1	5	38.4615	2.1e-13	4.95e-11	Apoptosis Regulation	Proteins: BCL2, BCL2L1, BCL2L11, BCL2L2, CASP8, FAS, IFNGR1, MCL1, MS4A1, PARP1, PTPN13, TBX3, TP53. 1. BCL2 family proteins regulate apoptosis: BCL2, BCL2L1, BCL2L11, BCL2L2, and MCL1 are members of the BCL2 family, which play a critical role in regulating apoptosis. BCL2 and BCL2L1 are anti-apoptotic, while BCL2L11 is pro-apoptotic. BCL2L2 and MCL1 have both anti- and pro-apoptotic roles depend…	13	100	Proteins: BCL2, BCL2L1, BCL2L11, BCL2L2, CASP8, FAS, IFNGR1, MCL1, MS4A1, PARP1, PTPN13, TBX3, TP53. 1. BCL2 family proteins regulate apoptosis: BCL2, BCL2L1, BCL2L11, BCL2L2, and MCL1 are members of the BCL2 family, which play a critical role in regulating apoptosis. BCL2 and BCL2L1 are anti-apoptotic, while BCL2L11 is pro-apoptotic. BCL2L2 and MCL1 have both anti- and pro-apoptotic roles depend…	1	0.553928	LLM	LLM
NeST	Checkpoint-regulated DNA repair	NEST:50	BARD1 BLM BRCA1 BRCA2 BUB1B CCND1 CCND2 CCND3 CCNE1 CCNE2 CDK4 CDK5 CDK6 CDKN1A CDKN1B CDKN1C CDKN2A CDKN2B CDKN2C CHEK1 CKS1B CREBBP CTNNB1 E2F1 E2F4 EP300 FANCD2 HDAC1 HLA-A MSH2 MSH6 MYC RAD51 RAD51C RB1 RBL1 RBL2 TERT TOP2A TP53 WRN	41	5.35755	Regulation Of Cyclin-Dependent Protein Kinase Activity	GO:1904029	CDKN1C;CDKN2B;BLM;CDKN1A;CCND3;CDKN2C;CDKN1B;CCND2;CCNE2;CCND1;CDKN2A;CCNE1	12	29.2683	2.34e-22	1.81e-19	Cell Cycle Regulation	The primary biological process performed by this system of interacting proteins is the regulation of the cell cycle. The cell cycle is a series of events that lead to cell growth, DNA replication, and cell division. The proteins in this system play crucial roles in controlling the progression of the cell cycle, ensuring accurate DNA replication, and maintaining genomic stability. 1. Cyclins and c…	40	97.561	The primary biological process performed by this system of interacting proteins is the regulation of the cell cycle. The cell cycle is a series of events that lead to cell growth, DNA replication, and cell division. The proteins in this system play crucial roles in controlling the progression of the cell cycle, ensuring accurate DNA replication, and maintaining genomic stability. 1. Cyclins and c…	0.434739	0.256044	LLM	Neither
NeST	Transcription	NEST:6	ANKRD11 AR ARID1A ARID1B ARID2 ASXL1 ASXL2 ATM ATR ATRX BAP1 BARD1 BCL11B BCL6 BCL7A BCLAF1 BCOR BCORL1 BRD4 CASP8 CDC73 CDK12 CDK8 CHD2 CHD4 CREBBP CTCF CTNNB1 CUX1 DAXX DDX3X DKC1 DNMT1 DNMT3A DNMT3B DOT1L E2F1 E2F6 EED EMSY EP300 ERCC2 ERCC3 ERCC5 ERCC6 ESR1 EWSR1 EZH2 FANCD2 FBXW7 FUBP1 FUS GATA1 GATA3 HDAC1 HDAC2 HDAC3 HDAC5 HIST1H1E HIST3H3 ING1 IRF2 KAT6A KDM5A KDM6A KMT2A KMT2B KMT2C KMT2…	146	7.18982	Regulation Of Transcription By RNA Polymerase II	GO:0006357	RB1;SMARCB1;DDX3X;YEATS4;CHD4;PRDM1;CTCF;CHD2;TNF;PHF6;ING1;CDC73;SOX2;MED12;BCL7A;MYC;MYB;DNMT3B;EP300;ARID2;MEN1;MED1;PBRM1;PARP1;EED;DNMT3A;ATRX;ARID1A;ARID1B;RUNX1;MYCL;MYCN;TFDP1;NCOR1;TBL1XR1;IRF2;RARA;BCORL1;TP53;KMT2D;HDAC5;HDAC2;HDAC3;KMT2A;MAX;PRKDC;HDAC1;KMT2C;DOT1L;GATA3;GATA1;ZBTB2;BCLAF1;MTA1;CUX1;NSD1;RAD21;E2F1;E2F6;SF3B1;BRD4;SMAD2;SMARCE1;SPEN;CREBBP;NPM1;BCL11B;FUS;SMARCA1;ESR1…	85	58.2192	1.09e-46	1.7e-43	DNA Damage Response and Chromatin Remodeling	The interacting proteins in this system are primarily involved in DNA damage response, chromatin remodeling, and transcription regulation. 1. DNA Damage Response: Several proteins in this system are involved in the detection and repair of DNA damage. Key proteins include ATM, ATR, ATRX, BARD1, BRCA1, ERCC2, ERCC3, ERCC5, ERCC6, FANCD2, PALB2, PRKDC, RAD21, TP53, XPA, and XRCC1. These proteins pla…	86	58.9041	The interacting proteins in this system are primarily involved in DNA damage response, chromatin remodeling, and transcription regulation. 1. DNA Damage Response: Several proteins in this system are involved in the detection and repair of DNA damage. Key proteins include ATM, ATR, ATRX, BARD1, BRCA1, ERCC2, ERCC3, ERCC5, ERCC6, FANCD2, PALB2, PRKDC, RAD21, TP53, XPA, and XRCC1. These proteins pla…	0.375055	0.539816	GO	GO
NeST	Nuclear receptor signaling	NEST:60	ANKRD11 BCL6 CEBPA CREBBP ESR2 GPS2 HDAC3 HDAC5 NCOA3 NCOR1 NCOR2 NRIP1 PGR RARA RUNX1T1 RXRA TBL1XR1	17	4.08746	Negative Regulation Of DNA-templated Transcription	GO:0045892	CEBPA;HDAC5;CREBBP;HDAC3;GPS2;ESR2;NCOR2;NCOR1;RXRA;BCL6;TBL1XR1;NRIP1;RARA;RUNX1T1	14	82.3529	4.66e-16	9.63e-14	Transcriptional Regulation	1. Coregulator proteins: ANKRD11, CEBPA, CREBBP, ESR2, GPS2, HDAC3, HDAC5, NCOA3, NCOR1, NCOR2, NRIP1, PGR, RARA, RUNX1T1, RXRA, TBL1XR1. - Reasoning: These proteins are known to function as transcriptional coregulators, which modulate gene expression by interacting with transcription factors and chromatin remodeling complexes. 2. Nuclear receptor proteins: ESR2, PGR, RARA, RXRA. - Reasoning: The…	17	100	1. Coregulator proteins: ANKRD11, CEBPA, CREBBP, ESR2, GPS2, HDAC3, HDAC5, NCOA3, NCOR1, NCOR2, NRIP1, PGR, RARA, RUNX1T1, RXRA, TBL1XR1. - Reasoning: These proteins are known to function as transcriptional coregulators, which modulate gene expression by interacting with transcription factors and chromatin remodeling complexes. 2. Nuclear receptor proteins: ESR2, PGR, RARA, RXRA.[1][2][3] - Reaso…	0.469446	0.283577	LLM	Neither
NeST	Ubiquitin regulation of mitophagy	NEST:77	CUL3 ELOC FBXW7 HSP90AA1 PARK2 SKP1 STK11 VHL	8	3	Protein Modification By Small Protein Conjugation	GO:0032446	FBXW7;CUL3;VHL;ELOC;SKP1	5	62.5	1.04e-07	2.58e-05	Ubiquitin-Proteasome System	Analysis: 1. CUL3, ELOC, SKP1, and FBXW7 form a cullin-RING E3 ubiquitin ligase complex. - CUL3 is a scaffold protein that binds to ELOC and SKP1. - ELOC and SKP1 are adaptor proteins that facilitate the interaction between CUL3 and FBXW7. - FBXW7 is an F-box protein that recognizes and binds to specific substrates for ubiquitination. 2. PARK2 is an E3 ubiquitin ligase. - PARK2 is involved in the…	8	100	1. CUL3, ELOC, SKP1, and FBXW7 form a cullin-RING E3 ubiquitin ligase complex.[1][2][3] - CUL3 is a scaffold protein that binds to ELOC and SKP1.[4][5][6] - ELOC and SKP1 are adaptor proteins that facilitate the interaction between CUL3 and FBXW7.[7][8][9] - FBXW7 is an F-box protein that recognizes and binds to specific substrates for ubiquitination.[10][11][12] 2. PARK2 is an E3 ubiquitin ligas…	0.507114	0.371369	LLM	LLM
NeST	ATM-dependent DNA repair	NEST:79	ATM AURKA BARD1 BLM BRCA1 BRCA2 BRIP1 BUB1B CDC73 CHEK1 FANCA FANCD2 MDC1 MDM2 MRE11 MSH6 NBN PALB2 POLH RAD50 RAD51 RAD51B RAD51C RAD51D TOP2A TP53 WRN XRCC2 XRCC3	29	4.85798	DNA Repair	GO:0006281	BARD1;BLM;MRE11;XRCC2;XRCC3;FANCA;BRCA1;BRCA2;RAD51B;MSH6;RAD50;RAD51D;WRN;RAD51C;RAD51;FANCD2;CHEK1;ATM;NBN;TP53;POLH	21	72.4138	4.9e-33	2.24e-30	DNA Damage Response and Repair	The primary biological process performed by this system of interacting proteins is the DNA damage response and repair. This process is crucial for maintaining genomic stability and preventing the accumulation of mutations that can lead to various diseases, including cancer. 1. ATM, ATR, and CHEK1 are key kinases involved in the DNA damage response. They are activated in response to DNA damage and…	28	96.5517	The primary biological process performed by this system of interacting proteins is the DNA damage response and repair. This process is crucial for maintaining genomic stability and preventing the accumulation of mutations that can lead to various diseases, including cancer. 1. ATM, ATR, and CHEK1 are key kinases involved in the DNA damage response. They are activated in response to DNA damage and…	0.706776	0.602849	LLM	Neither
NeST	Immune system`	NEST:8	AXL B2M BIRC3 BTK CARD11 CD19 CD22 CD274 CD40 CD70 CD79A CD79B CIITA CSF1R CSF3R CTLA4 CXCR4 CYLD FAM46C FAS FCGR2A FCGR3A FLT3 FOXP1 FYN GATA3 HAVCR2 HGF HLA-A HLA-B HLA-C HLA-DMA HLA-DMB HLA-DOA HLA-DOB HLA-DPA1 HLA-DPB1 HLA-DQA1 HLA-DQA2 HLA-DQB1 HLA-DQB2 HLA-DRA HLA-DRB1 HLA-DRB5 HLA-E HLA-F HLA-G IDO1 IFNGR2 IGF1 IKBKE IKZF1 IKZF3 IL10RA IL15 IL2RA IL6R IL7R IRF1 IRF4 JAK2 JAK3 KIT KLHL6 LAG…	99	6.62936	Positive Regulation Of Cytokine Production	GO:0001819	CSF1R;CD274;CD40;PIK3CD;PTPN22;GATA3;PIK3CG;PLCG2;TNFRSF14;TIGIT;JAK2;IL6R;IKBKE;HAVCR2;HLA-DPA1;SYK;IL15;HLA-A;POU2F2;HLA-G;FOXP1;HLA-E;IRF4;IRF1;TLR4;CARD11;MYD88	27	27.2727	5.35e-26	6.6e-23	Immune Response Regulation	The system of interacting proteins primarily performs the regulation of immune response. The proteins involved in this system can be categorized into several groups based on their functions: 1. Receptor proteins: AXL, CD19, CD22, CD40, CD70, CD79A, CD79B, CSF1R, CSF3R, CTLA4, CXCR4, FCGR2A, FCGR3A, FLT3, HAVCR2, IFNGR2, IL10RA, IL2RA, IL6R, IL7R, KIT, LAG3, MS4A1, NTRK3, PDCD1, PDCD1LG2, TIGIT, T…	98	98.9899	The system of interacting proteins primarily performs the regulation of immune response. The proteins involved in this system can be categorized into several groups based on their functions: 1. Receptor proteins: AXL, CD19, CD22, CD40, CD70, CD79A, CD79B, CSF1R, CSF3R, CTLA4, CXCR4, FCGR2A, FCGR3A, FLT3, HAVCR2, IFNGR2, IL10RA, IL2RA, IL6R, IL7R, KIT, LAG3, MS4A1, NTRK3, PDCD1, PDCD1LG2, TIGIT, T…	0.663048	0.234953	LLM	LLM
NeST	TNFR/Traf signaling	NEST:83	BIRC3 CASP8 CD40 FAS MAP3K7 PARP1 TNF TNFAIP3 TNFRSF9 TP53 TRAF2 TRAF3	12	3.58496	Regulation Of I-kappaB kinase/NF-kappaB Signaling	GO:0043122	CD40;CASP8;PARP1;TRAF3;TNFAIP3;TRAF2;TNF;MAP3K7;BIRC3	9	75	6.95e-16	4.2e-13	Apoptosis and Cell Signaling	Proteins: BIRC3, CASP8, CD40, FAS, MAP3K7, PARP1, TNF, TNFAIP3, TNFRSF9, TP53, TRAF2, TRAF3. 1. Apoptosis induction: FAS, TNF, and TNFRSF9 are cell surface receptors that can initiate apoptosis upon ligand binding. CASP8 is a key initiator caspase in the extrinsic apoptosis pathway, activated by FAS and TNF signaling. TP53 is a tumor suppressor protein that can induce apoptosis in response to DNA…	12	100	Proteins: BIRC3, CASP8, CD40, FAS, MAP3K7, PARP1, TNF, TNFAIP3, TNFRSF9, TP53, TRAF2, TRAF3. 1. Apoptosis induction: FAS, TNF, and TNFRSF9 are cell surface receptors that can initiate apoptosis upon ligand binding. CASP8 is a key initiator caspase in the extrinsic apoptosis pathway, activated by FAS and TNF signaling. TP53 is a tumor suppressor protein that can induce apoptosis in response to DNA…	0.558958	0.506933	LLM	Neither
NeST	Lymphoid JAK/STAT signaling	NEST:84	CSF3R EPOR IFNAR2 IL6R IRS1 IRS2 JAK1 JAK2 JAK3 PIK3R1 PTPN11 SOCS1 STAT3 STAT5A STAT5B STAT6	16	4	Cellular Response To Cytokine Stimulus	GO:0071345	IFNAR2;STAT5A;STAT5B;CSF3R;STAT3;PTPN11;EPOR;SOCS1;STAT6;JAK2;IL6R;JAK3;JAK1	13	81.25	1.14e-21	5.06e-19	JAK-STAT Signaling	The JAK-STAT signaling pathway is the primary biological process performed by this system of interacting proteins. This pathway is crucial for transmitting information from extracellular signals to the nucleus, resulting in gene expression changes. 1. Receptor activation: CSF3R, EPOR, IFNAR2, and IL6R are cytokine receptors that initiate the JAK-STAT signaling pathway upon ligand binding. These r…	16	100	The JAK-STAT signaling pathway is the primary biological process performed by this system of interacting proteins. This pathway is crucial for transmitting information from extracellular signals to the nucleus, resulting in gene expression changes. 1. Receptor activation: CSF3R, EPOR, IFNAR2, and IL6R are cytokine receptors that initiate the JAK-STAT signaling pathway upon ligand binding. These r…	0.808851	0.450239	LLM	Neither
NeST	Positive regulators of transcription	NEST:85	AR BCL6 CREBBP EP300 HDAC1 HDAC2 KAT6A MYC PML RUNX1 TBL1XR1 TERT TNF TP53 YEATS4	15	3.90689	Positive Regulation Of Nucleic Acid-Templated Transcription	GO:1903508	CREBBP;HDAC2;HDAC1;TBL1XR1;KAT6A;MYC;EP300;YEATS4;TNF;TP53;RUNX1	11	73.3333	8.75e-15	5.3e-12	Transcriptional Regulation and Cellular Growth Control	The system of interacting proteins primarily involves transcriptional regulation and cellular growth control. The proteins involved in this system are AR, BCL6, CREBBP, EP300, HDAC1, HDAC2, KAT6A, MYC, PML, RUNX1, TBL1XR1, TERT, TNF, TP53, and YEATS4. 1. Transcriptional Regulation: Several proteins in this system are involved in transcriptional regulation, including CREBBP, EP300, HDAC1, HDAC2, K…	15	100	The system of interacting proteins primarily involves transcriptional regulation and cellular growth control. The proteins involved in this system are AR, BCL6, CREBBP, EP300, HDAC1, HDAC2, KAT6A, MYC, PML, RUNX1, TBL1XR1, TERT, TNF, TP53, and YEATS4.[1][2][3] 1. Transcriptional Regulation: Several proteins in this system are involved in transcriptional regulation, including CREBBP, EP300, HDAC1,…	0.533433	0.590434	GO	GO
NeST	Regulation of JAK-STAT signaling	NEST:89	BCR CBL CBLB CSF3R EGF EGFR ERBB2 ERBB3 ERBB4 FRS2 INPPL1 IRS1 JAK1 JAK2 PDGFRA PIK3R1 PLCG2 PTPN11 RET STAT3 STAT5A	21	4.39232	Transmembrane Receptor Protein Tyrosine Kinase Signaling Pathway	GO:0007169	RET;PDGFRA;ERBB3;IRS1;ERBB4;STAT3;ERBB2;PTPN11;FRS2;PIK3R1;JAK2;EGFR	12	57.1429	1.4e-17	9.19e-15	Receptor Tyrosine Kinase Signaling	The most prominent biological process performed by this system of interacting proteins is receptor tyrosine kinase (RTK) signaling. This process is crucial for cellular communication, growth, and differentiation. 1. RTK activation: EGF, EGFR, ERBB2, ERBB3, ERBB4, and PDGFRA are all RTKs or ligands involved in RTK activation. EGF binds to EGFR, leading to dimerization and autophosphorylation of th…	21	100	The most prominent biological process performed by this system of interacting proteins is receptor tyrosine kinase (RTK) signaling. This process is crucial for cellular communication, growth, and differentiation. 1. RTK activation: EGF, EGFR, ERBB2, ERBB3, ERBB4, and PDGFRA are all RTKs or ligands involved in RTK activation. EGF binds to EGFR, leading to dimerization and autophosphorylation of th…	0.363489	0.294756	Neither	Tied
NeST	Nucleolus	NEST:9	ASNS ATIC CDC73 CDK8 CHEK2 CTCF DDX3X DIS3 DKC1 FOXL2 FUS GSTP1 HDAC1 HRAS NHP2 NPM1 NSD2 PA2G4 PELP1 PHB2 PPP2CA PPP2CB RHOA RPL5 RPS15 SF3B1 SHQ1 TERT TNF TOP2A UMPS UPF1 VHL XPC	34	5.08746	Regulation Of Apoptotic Process	GO:0042981	TOP2A;NPM1;SHQ1;DDX3X;HDAC1;GSTP1;ASNS;FOXL2;PA2G4;VHL;PHB2;TNF	12	35.2941	9.02e-10	7.59e-07	Cell Cycle Regulation and DNA Repair	The primary biological process performed by this system of interacting proteins is cell cycle regulation and DNA repair. The proteins involved in this process are crucial for maintaining genomic stability and preventing the accumulation of mutations that could lead to diseases such as cancer. 1. Cell cycle regulation: Several proteins in this system are involved in the regulation of the cell cycl…	13	38.2353	The primary biological process performed by this system of interacting proteins is cell cycle regulation and DNA repair. The proteins involved in this process are crucial for maintaining genomic stability and preventing the accumulation of mutations that could lead to diseases such as cancer. 1. Cell cycle regulation: Several proteins in this system are involved in the regulation of the cell cycl…	0.362622	0.213524	Neither	Neither
NeST	G1/S phase	NEST:91	BRCA1 BUB1B CCND1 CCNE1 CDKN1A CDKN1B CDKN2A CKS1B CREBBP CTNNB1 E2F1 EP300 HDAC1 HLA-A MYC RB1 RBL1 TOP2A TP53	19	4.24793	Cell Cycle G1/S Phase Transition	GO:0044843	CDKN1A;CDKN1B;CCND1;CCNE1;MYC;E2F1	6	31.5789	6.06e-12	3.29e-09	Cell Cycle Regulation	The system of interacting proteins primarily involves the regulation of the cell cycle, including cell cycle progression, checkpoint control, and DNA repair. The key proteins involved in these processes are BRCA1, BUB1B, CCND1, CCNE1, CDKN1A, CDKN1B, CDKN2A, CKS1B, CREBBP, CTNNB1, E2F1, EP300, HDAC1, HLA-A, MYC, RB1, RBL1, TOP2A, and TP53. 1. Cell cycle progression: Cyclins and cyclin-dependent k…	19	100	The system of interacting proteins primarily involves the regulation of the cell cycle, including cell cycle progression, checkpoint control, and DNA repair. The key proteins involved in these processes are BRCA1, BUB1B, CCND1, CCNE1, CDKN1A, CDKN1B, CDKN2A, CKS1B, CREBBP, CTNNB1, E2F1, EP300, HDAC1, HLA-A, MYC, RB1, RBL1, TOP2A, and TP53.[1][2][3] 1. Cell cycle progression: Cyclins and cyclin-de…	0.638699	0.856685	GO	GO
NeST	Cell projection morphogenesis	NEST:97	EPHA2 EPHA3 EPHA5 EPHA7 EPHB1 EPHB2 PTPRD SLIT2	8	3	Ephrin Receptor Signaling Pathway	GO:0048013	EPHA5;EPHA7;EPHB2;EPHB1;EPHA3;EPHA2	6	75	1.91e-15	4.88e-13	Ephrin Receptor Signaling	The primary biological process performed by this system of interacting proteins is Ephrin receptor signaling. This process is crucial for various cellular functions, including cell adhesion, migration, and axon guidance. 1. Ephrin receptor family: EPHA2, EPHA3, EPHA5, EPHA7, EPHB1, and EPHB2 are all members of the Ephrin receptor family. These proteins are receptor tyrosine kinases that bind to m…	8	100	The primary biological process performed by this system of interacting proteins is Ephrin receptor signaling. This process is crucial for various cellular functions, including cell adhesion, migration, and axon guidance. 1. Ephrin receptor family: EPHA2, EPHA3, EPHA5, EPHA7, EPHB1, and EPHB2 are all members of the Ephrin receptor family. These proteins are receptor tyrosine kinases that bind to m…	0.392374	0.390172	Neither	Neither
Diff. expressed gene set	ADIPOGENESIS	NA	ABCA1 ABCB8 ACAA2 ACADL ACADM ACADS ACLY ACO2 ACOX1 ADCY6 ADIG ADIPOQ ADIPOR2 AGPAT3 AIFM1 AK2 ALDH2 ALDOA ANGPT1 ANGPTL4 APLP2 APOE ARAF ARL4A ATL2 ATP1B3 ATP5PO BAZ2A BCKDHA BCL2L13 BCL6 C3 CAT CAVIN1 CAVIN2 CCNG2 CD151 CD302 CD36 CDKN2C CHCHD10 CHUK CIDEA CMBL CMPK1 COL15A1 COL4A1 COQ3 COQ5 COQ9 COX6A1 COX7B COX8A CPT2 CRAT CS CYC1 CYP4B1 DBT DDT DECR1 DGAT1 DHCR7 DHRS7 DHRS7B DLAT DLD DNAJB9 …	200	7.64386	Cellular Respiration	GO:0045333	COX8A;COX7B;NDUFB7;NDUFA5;MDH2;SDHC;UQCR11;ETFB;UQCR10;COX6A1;SDHB;UQCRQ;NDUFAB1;NDUFS3;UQCRC1;CYC1	16	8	2.34e-16	3.22e-13	Fatty Acid Metabolism and Oxidative Phosphorylation	The primary biological process performed by this system of interacting proteins is fatty acid metabolism and oxidative phosphorylation. The proteins involved in these processes are essential for energy production and storage in cells. Fatty Acid Metabolism: Key proteins involved in fatty acid metabolism include ACADM, ACADS, ACAA2, ACADL, ACOX1, ELOVL6, FABP4, and CPT2. These proteins are involve…	24	12	The primary biological process performed by this system of interacting proteins is fatty acid metabolism and oxidative phosphorylation. The proteins involved in these processes are essential for energy production and storage in cells. Key proteins involved in fatty acid metabolism include ACADM, ACADS, ACAA2, ACADL, ACOX1, ELOVL6, FABP4, and CPT2. These proteins are involved in the breakdown of f…	0.437073	0.453346	Tied	LLM
Diff. expressed gene set	ALLOGRAFT REJECTION	NA	AARS1 ABCE1 ABI1 ACHE ACVR2A AKT1 APBB1 B2M BCAT1 BCL10 BCL3 BRCA1 C2 CAPG CARTPT CCL11 CCL13 CCL19 CCL2 CCL22 CCL4 CCL5 CCL7 CCND2 CCND3 CCR1 CCR2 CCR5 CD1D CD2 CD247 CD28 CD3D CD3E CD3G CD4 CD40 CD40LG CD47 CD7 CD74 CD79A CD80 CD86 CD8A CD8B CD96 CDKN2A CFP CRTAM CSF1 CSK CTSS CXCL13 CXCL9 CXCR3 DARS1 DEGS1 DYRK3 EGFR EIF3A EIF3D EIF3J EIF4G3 EIF5A ELANE ELF4 EREG ETS1 F2 F2R FAS FASLG FCGR2B F…	200	7.64386	Positive Regulation Of Cytokine Production	GO:0001819	CD86;ITK;CD40;CD80;BRCA1;TNF;IL12B;IL12A;JAK2;MAP3K7;CCR2;MBL2;IL10;IL15;RIPK2;IL13;F2R;IL18;IL16;TRAF2;HLA-A;HLA-G;EREG;HLA-E;TLR1;FGR;IFNG;IRF4;IL1B;IRF7;TLR6;LTB;TLR3;TLR2;BCL10;HIF1A;NLRP3;CCL19;IL12RB1;ELANE;CD74;TGFB1;NOS2;CRTAM;GLMN;IL2;CD2;IL4;CD4;IL6;PTPRC;CD40LG;IL7;IL9;CD28	55	27.5	1.49e-52	3.09e-49	Immune Response Regulation	The system of interacting proteins primarily performs the regulation of immune response. The proteins involved in this system can be categorized into several groups based on their functions: 1. Cytokines and their receptors: IL10, IL11, IL12A, IL12B, IL12RB1, IL13, IL15, IL16, IL18, IL18RAP, IL1B, IL2, IL27RA, IL2RA, IL2RB, IL2RG, IL4, IL4R, IL6, IL7, IL9, IFNAR2, IFNG, IFNGR1, IFNGR2, LIF, and T…	119	59.5	The system of interacting proteins primarily performs the regulation of immune response. The proteins involved in this system can be categorized into several groups based on their functions: 1. Cytokines and their receptors: IL10, IL11, IL12A, IL12B, IL12RB1, IL13, IL15, IL16, IL18, IL18RAP, IL1B, IL2, IL27RA, IL2RA, IL2RB, IL2RG, IL4, IL4R, IL6, IL7, IL9, IFNAR2, IFNG, IFNGR1, IFNGR2, LIF, and T…	0.43272	0.186337	LLM	LLM
Diff. expressed gene set	ANDROGEN RESPONSE	NA	ABCC4 ABHD2 ACSL3 ACTN1 ADAMTS1 ADRM1 AKAP12 AKT1 ALDH1A3 ANKH APPBP2 ARID5B AZGP1 B2M B4GALT1 BMPR1B CAMKK2 CCND1 CCND3 CDC14B CDK6 CENPN DBI DHCR24 DNAJB9 ELK4 ELL2 ELOVL5 FADS1 FKBP5 GNAI3 GPD1L GSR GUCY1A1 H1-0 HERC3 HMGCR HMGCS1 HOMER2 HPGD HSD17B14 IDI1 INPP4B INSIG1 IQGAP2 ITGAV KLK2 KLK3 KRT19 KRT8 LIFR LMAN1 MAF MAK MAP7 MERTK MYL12A NCOA4 NDRG1 NGLY1 NKX3-1 PA2G4 PDLIM5 PGM3 PIAS1 PLPP1…	101	6.65821	Androgen Receptor Signaling Pathway	GO:0030521	ZMIZ1;PMEPA1;PLPP1;NKX3-1	4	3.9604	1.39e-06	0.000823	Lipid Metabolism and Cellular Stress Response Regulation	The primary biological process performed by this system of interacting proteins is the regulation of lipid metabolism and cellular stress response. The proteins involved in this process are: 1. ACSL3: Acyl-CoA synthetase long-chain family member 3, involved in fatty acid metabolism by catalyzing the formation of acyl-CoA from fatty acids. 2. DHCR24: 24-dehydrocholesterol reductase, involved in ch…	16	15.8416	The primary biological process performed by this system of interacting proteins is the regulation of lipid metabolism and cellular stress response. The proteins involved in this process are: 1. ACSL3: Acyl-CoA synthetase long-chain family member 3, involved in fatty acid metabolism by catalyzing the formation of acyl-CoA from fatty acids.[1][2][3] 2. DHCR24: 24-dehydrocholesterol reductase, invol…	0.409314	0.687878	GO	GO
Diff. expressed gene set	ANGIOGENESIS	NA	APOH APP CCND2 COL3A1 COL5A2 CXCL6 FGFR1 FSTL1 ITGAV JAG1 JAG2 KCNJ8 LPL LRPAP1 LUM MSX1 NRP1 OLR1 PDGFA PF4 PGLYRP1 POSTN PRG2 PTK2 S100A4 SERPINA5 SLCO2A1 SPP1 STC1 THBD TIMP1 TNFRSF21 VAV2 VCAN VEGFA VTN	36	5.16993	Regulation Of Cell Population Proliferation	GO:0042127	JAG2;APP;JAG1;CCND2;PDGFA;ITGAV;TIMP1;PTK2;VEGFA;FGFR1;PF4	11	30.5556	6.06e-08	4.34e-05	Extracellular Matrix Remodeling	The most prominent biological process performed by this system of interacting proteins is extracellular matrix (ECM) remodeling. This process is crucial for various cellular activities, including cell adhesion, migration, and differentiation. 1. ECM components: Several proteins in the system, such as COL3A1, COL5A2, LUM, and VCAN, are directly involved in the composition and organization of the E…	16	44.4444	The most prominent biological process performed by this system of interacting proteins is extracellular matrix (ECM) remodeling. This process is crucial for various cellular activities, including cell adhesion, migration, and differentiation. 1. ECM components: Several proteins in the system, such as COL3A1, COL5A2, LUM, and VCAN, are directly involved in the composition and organization of the E…	0.581099	0.297151	LLM	Neither
Diff. expressed gene set	APICAL JUNCTION	NA	ACTA1 ACTB ACTC1 ACTG1 ACTG2 ACTN1 ACTN2 ACTN3 ACTN4 ADAM15 ADAM23 ADAM9 ADAMTS5 ADRA1B AKT2 AKT3 ALOX15B AMH AMIGO1 AMIGO2 ARHGEF6 ARPC2 ATP1A3 B4GALT1 BAIAP2 BMP1 CADM2 CADM3 CALB2 CAP1 CD209 CD274 CD276 CD34 CD86 CD99 CDH1 CDH11 CDH15 CDH3 CDH4 CDH6 CDH8 CDK8 CDSN CERCAM CLDN11 CLDN14 CLDN15 CLDN18 CLDN19 CLDN4 CLDN5 CLDN6 CLDN7 CLDN8 CLDN9 CNN2 CNTN1 COL16A1 COL17A1 COL9A1 CRAT CRB3 CTNNA1 CT…	200	7.64386	Cell-Cell Adhesion Via Plasma-Membrane Adhesion Molecules	GO:0098742	ITGB1;AMIGO1;AMIGO2;NEXN;PKD1;CDH8;ICAM1;CDH6;TRO;CDH4;CDH3;CDH1;MPZL2;CADM3;VCAM1;CADM2;CLDN6;CLDN11;CLDN5;CLDN4;CLDN15;CLDN9;CD209;CLDN14;CLDN8;CLDN7;CDH11;CLDN19;PECAM1;CLDN18;CDH15;NECTIN4;NECTIN3;NECTIN2;NECTIN1	35	17.5	5.91e-36	1.02e-32	Cell Adhesion and Migration	The primary biological process performed by this system of interacting proteins is cell adhesion and migration. This is supported by the presence of numerous proteins involved in cell-cell and cell-matrix interactions, cytoskeletal organization, and signal transduction. 1. Cell adhesion proteins: CDH1, CDH11, CDH15, CDH3, CDH4, CDH6, CDH8, CD34, ICAM1, ICAM2, ICAM4, ICAM5, ITGA10, ITGA2, ITGA3, I…	95	47.5	The primary biological process performed by this system of interacting proteins is cell adhesion and migration. This is supported by the presence of numerous proteins involved in cell-cell and cell-matrix interactions, cytoskeletal organization, and signal transduction. 1. Cell adhesion proteins: CDH1, CDH11, CDH15, CDH3, CDH4, CDH6, CDH8, CD34, ICAM1, ICAM2, ICAM4, ICAM5, ITGA10, ITGA2, ITGA3, I…	0.455233	0.410487	Tied	GO
Diff. expressed gene set	APICAL SURFACE	NA	ADAM10 ADIPOR2 AFAP1L2 AKAP7 APP ATP6V0A4 ATP8B1 B4GALT1 BRCA1 CD160 CROCC CRYBG1 CX3CL1 DCBLD2 EFNA5 EPHB4 FLOT2 GAS1 GATA3 GHRL GSTM3 HSPB1 IL2RB IL2RG LYN LYPD3 MAL MDGA1 NCOA6 NTNG1 PCSK9 PKHD1 PLAUR RHCG RTN4RL1 SCUBE1 SHROOM2 SLC22A12 SLC2A4 SLC34A3 SRPX SULF2 THY1 TMEM8B	44	5.45943	Apical Protein Localization	GO:0045176	ATP8B1;SHROOM2;MAL	3	6.81818	8.27e-07	0.00038	Cell Adhesion and Signaling	The primary biological process performed by this system of interacting proteins is cell adhesion and signaling. This is supported by the presence of several proteins involved in these processes, such as ADAM10, APP, EFNA5, EPHB4, and FLOT2. 1. ADAM10: A disintegrin and metalloproteinase, ADAM10 plays a crucial role in cell-cell interactions and cell signaling. It is involved in the shedding of ce…	9	20.4545	The primary biological process performed by this system of interacting proteins is cell adhesion and signaling. This is supported by the presence of several proteins involved in these processes, such as ADAM10, APP, EFNA5, EPHB4, and FLOT2.[1][2][3] 1. ADAM10: A disintegrin and metalloproteinase, ADAM10 plays a crucial role in cell-cell interactions and cell signaling. It is involved in the shedd…	0.341518	0.651904	GO	GO
Diff. expressed gene set	APOPTOSIS	NA	ADD1 AIFM3 ANKH ANXA1 APP ATF3 AVPR1A BAX BCAP31 BCL10 BCL2L1 BCL2L10 BCL2L11 BCL2L2 BGN BID BIK BIRC3 BMF BMP2 BNIP3L BRCA1 BTG2 BTG3 CASP1 CASP2 CASP3 CASP4 CASP6 CASP7 CASP8 CASP9 CAV1 CCNA1 CCND1 CCND2 CD14 CD2 CD38 CD44 CD69 CDC25B CDK2 CDKN1A CDKN1B CFLAR CLU CREBBP CTH CTNNB1 CYLD DAP DAP3 DCN DDIT3 DFFA DIABLO DNAJA1 DNAJC3 DNM1L DPYD EBP EGR3 EMP1 ENO2 ERBB2 ERBB3 EREG ETF1 F2 F2R FAS FA…	161	7.33092	Regulation Of Apoptotic Process	GO:0042981	TOP2A;HSPB1;FASLG;CLU;TNF;CASP9;CCND2;CASP8;CASP6;CASP3;TNFSF10;CASP2;CD38;DNM1L;IER3;BNIP3L;DFFA;ANXA1;TNFRSF12A;HGF;RHOB;DNAJC3;SQSTM1;CD44;BIRC3;DIABLO;LEF1;PSEN2;XIAP;BCL10;PSEN1;RELA;BCL2L10;BCL2L11;ERBB3;ERBB2;PMAIP1;BMF;BID;MCL1;JUN;EGR3;GADD45B;BIK;GADD45A;MGMT;CFLAR;PTK2;SOD1;DNAJA1;BMP2;IL6;KRT18;PPT1;FAS;BAX;CTNNB1;BCL2L2;BCL2L1	59	36.646	3.56e-44	7.51e-41	Apoptosis Regulation	The most prominent biological process performed by this system of interacting proteins is the regulation of apoptosis, which is a form of programmed cell death. This process is essential for maintaining cellular homeostasis and preventing the development of diseases such as cancer. 1. BCL-2 family proteins: BCL2L1, BCL2L10, BCL2L11, and BCL2L2 are anti-apoptotic proteins, while BAX, BID, BIK, BMF…	40	24.8447	The most prominent biological process performed by this system of interacting proteins is the regulation of apoptosis, which is a form of programmed cell death. This process is essential for maintaining cellular homeostasis and preventing the development of diseases such as cancer. 1. BCL-2 family proteins: BCL2L1, BCL2L10, BCL2L11, and BCL2L2 are anti-apoptotic proteins, while BAX, BID, BIK, BMF…	0.820519	0.736513	LLM	Tied
Diff. expressed gene set	BILE ACID METABOLISM	NA	ABCA1 ABCA2 ABCA3 ABCA4 ABCA5 ABCA6 ABCA8 ABCA9 ABCD1 ABCD2 ABCD3 ABCG4 ABCG8 ACSL1 ACSL5 AGXT AKR1D1 ALDH1A1 ALDH8A1 ALDH9A1 AMACR APOA1 AQP9 AR ATXN1 BBOX1 BCAR3 BMP6 CAT CH25H CROT CYP27A1 CYP39A1 CYP46A1 CYP7A1 CYP7B1 CYP8B1 DHCR24 DIO1 DIO2 EFHC1 EPHX2 FADS1 FADS2 FDXR GC GCLM GNMT GNPAT GSTK1 HACL1 HAO1 HSD17B11 HSD17B4 HSD17B6 HSD3B1 HSD3B7 IDH1 IDH2 IDI1 ISOC1 KLF1 LCK LIPE LONP2 MLYCD NE…	112	6.80735	Steroid Biosynthetic Process	GO:0006694	HSD3B7;ABCD3;AKR1D1;HSD3B1;CYP46A1;CYP7B1;CYP7A1;CYP8B1;CYP27A1;CYP39A1;CH25H;AMACR;SCP2;FDXR;SLC27A2;SLC27A5	16	14.2857	1.29e-24	9.7e-22	Cholesterol and Lipid Metabolism	The primary biological process performed by this system of interacting proteins is cholesterol and lipid metabolism. This is evident from the presence of several key proteins involved in the synthesis, transport, and regulation of cholesterol and lipids. 1. ABCA1, ABCA2, ABCA3, ABCA4, ABCA5, ABCA6, ABCA8, ABCA9, ABCD1, ABCD2, ABCD3, ABCG4, and ABCG8 are all members of the ATP-binding cassette (AB…	36	32.1429	The primary biological process performed by this system of interacting proteins is cholesterol and lipid metabolism. This is evident from the presence of several key proteins involved in the synthesis, transport, and regulation of cholesterol and lipids. 1. ABCA1, ABCA2, ABCA3, ABCA4, ABCA5, ABCA6, ABCA8, ABCA9, ABCD1, ABCD2, ABCD3, ABCG4, and ABCG8 are all members of the ATP-binding cassette (AB…	0.757184	0.422213	LLM	LLM
Diff. expressed gene set	CHOLESTEROL HOMEOSTASIS	NA	ABCA2 ACAT2 ACSS2 ACTG1 ADH4 ALCAM ALDOC ANTXR2 ANXA13 ANXA5 ATF3 ATF5 ATXN2 AVPR1A CBS CD9 CHKA CLU CPEB2 CTNNB1 CXCL16 CYP51A1 DHCR7 EBP ECH1 ERRFI1 ETHE1 FABP5 FADS2 FASN FBXO6 FDFT1 FDPS GLDC GNAI1 GPX8 GSTM2 GUSB HMGCR HMGCS1 HSD17B7 IDI1 JAG1 LDLR LGALS3 LGMN LPL LSS MAL2 MVD MVK NFIL3 NIBAN1 NSDHL PCYT2 PDK3 PLAUR PLSCR1 PMVK PNRC1 PPARG S100A11 SC5D SCD SEMA3B SQLE SREBF2 STARD4 STX5 TM7S…	74	6.20945	Cholesterol Biosynthetic Process	GO:0006695	MVK;HMGCS1;CYP51A1;HMGCR;HSD17B7;LSS;TM7SF2;NSDHL;PMVK;SC5D;MVD;DHCR7;FDFT1	13	17.5676	4.01e-26	3.53e-23	Cholesterol Biosynthesis and Lipid Metabolism	The most prominent biological process performed by this system of interacting proteins is cholesterol biosynthesis and lipid metabolism. This conclusion is based on the presence of several key proteins involved in these processes, as well as their interactions with other proteins in the system. 1. Cholesterol biosynthesis: Several proteins in the system are directly involved in the cholesterol bi…	14	18.9189	The most prominent biological process performed by this system of interacting proteins is cholesterol biosynthesis and lipid metabolism. This conclusion is based on the presence of several key proteins involved in these processes, as well as their interactions with other proteins in the system. 1. Cholesterol biosynthesis: Several proteins in the system are directly involved in the cholesterol bi…	0.801483	0.701562	LLM	LLM
Diff. expressed gene set	COAGULATION	NA	A2M ACOX2 ADAM9 ANG ANXA1 APOA1 APOC1 APOC2 APOC3 ARF4 BMP1 C1QA C1R C1S C2 C3 C8A C8B C8G C9 CAPN2 CAPN5 CASP9 CD9 CFB CFD CFH CFI CLU COMP CPB2 CPN1 CPQ CRIP2 CSRP1 CTSB CTSE CTSH CTSK CTSO CTSV DCT DPP4 DUSP14 DUSP6 F10 F11 F12 F13B F2 F2RL2 F3 F8 F9 FBN1 FGA FGG FN1 FURIN FYN GDA GNB2 GNG12 GP1BA GP9 GSN HMGCS2 HNF4A HPN HRG HTRA1 ISCU ITGA2 ITGB3 ITIH1 KLF7 KLK8 KLKB1 LAMP2 LEFTY2 LGMN LRP1 …	138	7.10852	Proteolysis	GO:0006508	CPB2;CFH;CPQ;TMPRSS6;HPN;HTRA1;PLAT;FURIN;PLG;CTSV;CPN1;DPP4;THBD;PLAU;CTSK;CAPN5;CAPN2;CTSH;OLR1;CTSE;CTSB;MBL2;MMP7;MMP1;F12;MMP2;MMP3;MMP8;MMP9;MMP14;PROC;BMP1;F9;MMP15;KLKB1;LGMN	36	26.087	4.24e-33	5.79e-30	Complement System Activation and Regulation	The most prominent biological process performed by this system of interacting proteins is the activation and regulation of the complement system, which plays a crucial role in innate immunity and inflammation. 1. Central role of complement proteins: The presence of key complement proteins such as C1QA, C1R, C1S, C2, C3, C8A, C8B, C8G, and C9 indicates the involvement of the classical, alternative…	65	47.1014	The most prominent biological process performed by this system of interacting proteins is the activation and regulation of the complement system, which plays a crucial role in innate immunity and inflammation. 1. Central role of complement proteins: The presence of key complement proteins such as C1QA, C1R, C1S, C2, C3, C8A, C8B, C8G, and C9 indicates the involvement of the classical, alternative…	0.509081	0.475827	Tied	LLM
Diff. expressed gene set	COMPLEMENT	NA	ACTN2 ADAM9 ADRA2B AKAP10 ANG ANXA5 APOA4 APOBEC3F APOBEC3G APOC1 ATOX1 BRPF3 C1QA C1QC C1R C1S C2 C3 C4BPB C9 CA2 CALM1 CALM3 CASP1 CASP10 CASP3 CASP4 CASP5 CASP7 CASP9 CBLB CCL5 CD36 CD40LG CD46 CD55 CD59 CDA CDH13 CDK5R1 CEBPB CFB CFH CLU COL4A2 CP CPM CPQ CR1 CR2 CSRP1 CTSB CTSC CTSD CTSH CTSL CTSO CTSS CTSV CXCL1 DGKG DGKH DOCK10 DOCK4 DOCK9 DPP4 DUSP5 DUSP6 DYRK2 EHD1 ERAP2 F10 F2 F3 F5 F7 …	200	7.64386	Proteolysis	GO:0006508	FCN1;CPM;CFH;TMPRSS6;CPQ;PLAT;PLG;CTSV;PSEN1;CTSS;PHEX;DPP4;CASP7;CTSL;CASP3;CASP4;CASP1;CTSH;OLR1;PRSS3;CTSD;CTSC;CTSB;ERAP2;GZMA;GZMB;MMP8;MMP12;F7;MMP14;XPNPEP1;MMP15;KLKB1;LGMN	34	17	1.16e-24	2.42e-21	Complement System Activation and Regulation	The most prominent biological process performed by this system of interacting proteins is the activation and regulation of the complement system. The complement system is a crucial part of the immune response, playing a role in the clearance of pathogens, immune complex formation, and inflammation regulation. 1. Central components of the complement system: The presence of key proteins such as C1Q…	61	30.5	The most prominent biological process performed by this system of interacting proteins is the activation and regulation of the complement system. The complement system is a crucial part of the immune response, playing a role in the clearance of pathogens, immune complex formation, and inflammation regulation. 1. Central components of the complement system: The presence of key proteins such as C1Q…	0.746172	0.396235	LLM	LLM
Diff. expressed gene set	DNA REPAIR	NA	AAAS ADA ADCY6 ADRM1 AGO4 AK1 AK3 ALYREF APRT ARL6IP1 BCAM BCAP31 BOLA2 BRF2 CANT1 CCNO CDA CETN2 CLP1 CMPK2 COX17 CSTF3 DAD1 DCTN4 DDB1 DDB2 DGCR8 DGUOK DUT EDF1 EIF1B ELL ELOA ERCC1 ERCC2 ERCC3 ERCC4 ERCC5 ERCC8 FEN1 GMPR2 GPX4 GSDME GTF2A2 GTF2B GTF2F1 GTF2H1 GTF2H3 GTF2H5 GTF3C5 GUK1 HCLS1 HPRT1 IMPDH2 ITPA LIG1 MPC2 MPG MRPL40 NCBP2 NELFB NELFCD NELFE NFX1 NME1 NME3 NME4 NPR2 NT5C NT5C3A NUD…	150	7.22882	Transcription By RNA Polymerase II	GO:0006366	GTF2A2;ELL;GTF2B;TAF9;SUPT4H1;SNAPC5;POLR2A;TAF1C;POLR2C;SNAPC4;POLR2D;POLR2E;ELOA;POLR2F;POLR2G;POLR2H;POLR2I;POLR2J;POLR2K;TAF12;NCBP2;TAF13;TAF10;ADRM1;GTF2H1;GTF2F1;SUPT5H;GTF2H3;GTF2H5;ERCC3;NFX1;ERCC2;TAF6	33	22	9.58e-36	8.64e-33	DNA Repair and Transcription Regulation	The primary biological process performed by this system of interacting proteins is DNA repair and transcription regulation. The proteins involved in this system play crucial roles in maintaining genomic integrity and regulating gene expression. 1. DNA repair: Several proteins in this system are involved in different DNA repair pathways, including nucleotide excision repair (NER), base excision re…	77	51.3333	The primary biological process performed by this system of interacting proteins is DNA repair and transcription regulation. The proteins involved in this system play crucial roles in maintaining genomic integrity and regulating gene expression. 1. DNA repair: Several proteins in this system are involved in different DNA repair pathways, including nucleotide excision repair (NER), base excision re…	0.797092	0.396987	LLM	LLM
Diff. expressed gene set	E2F TARGETS	NA	AK2 ANP32E ASF1A ASF1B ATAD2 AURKA AURKB BARD1 BIRC5 BRCA1 BRCA2 BRMS1L BUB1B CBX5 CCNB2 CCNE1 CCP110 CDC20 CDC25A CDC25B CDCA3 CDCA8 CDK1 CDK4 CDKN1A CDKN1B CDKN2A CDKN2C CDKN3 CENPE CENPM CHEK1 CHEK2 CIT CKS1B CKS2 CNOT9 CSE1L CTCF CTPS1 DCK DCLRE1B DCTPP1 DDX39A DEK DEPDC1 DIAPH3 DLGAP5 DNMT1 DONSON DSCC1 DUT E2F8 EED EIF2S1 ESPL1 EXOSC8 EZH2 GINS1 GINS3 GINS4 GSPT1 H2AX H2AZ1 HELLS HMGA1 HMGB…	200	7.64386	DNA Metabolic Process	GO:0006259	TOP2A;DCLRE1B;MRE11;MCM7;HMGB2;HMGB3;BRCA1;CHEK1;NBN;KPNA2;POLE;RFC3;LIG1;RFC2;HUS1;SMC1A;RAD51C;MSH2;TIMELESS;MCM3;MCM4;MCM5;MCM6;DCTPP1;ASF1A;MCM2;PRIM2;RNASEH2A;PRKDC;PDS5B;UNG;RAD51AP1;POLD3;ORC6;RAD21;POLD1;ORC2;POLD2;BARD1;DUT;XRCC6;RPA1;DONSON;RPA2;NAP1L1;POLA2;RAD50;RPA3;UBE2T;CDK1;RAN	51	25.5	2.63e-49	2.86e-46	Cell Cycle Regulation and DNA Repair	The interacting proteins in this system primarily function in cell cycle regulation and DNA repair. Key proteins involved in these processes include: 1. Cell cycle regulation: CDK1, CDK4, CDKN1A, CDKN1B, CDKN2A, CDKN2C, CDKN3, CCNB2, CCNE1, CDC20, CDC25A, CDC25B, AURKA, AURKB, PLK1, PLK4, and WEE1. These proteins are involved in the regulation of cell cycle progression, including G1/S and G2/M tr…	60	30	The interacting proteins in this system primarily function in cell cycle regulation and DNA repair. Key proteins involved in these processes include: 1. Cell cycle regulation: CDK1, CDK4, CDKN1A, CDKN1B, CDKN2A, CDKN2C, CDKN3, CCNB2, CCNE1, CDC20, CDC25A, CDC25B, AURKA, AURKB, PLK1, PLK4, and WEE1. These proteins are involved in the regulation of cell cycle progression, including G1/S and G2/M tr…	0.400885	0.273244	LLM	LLM
Diff. expressed gene set	EPITHELIAL MESENCHYMAL TRANSITION	NA	ABI3BP ACTA2 ADAM12 ANPEP APLP1 AREG BASP1 BDNF BGN BMP1 CADM1 CALD1 CALU CAP2 CAPG CCN1 CCN2 CD44 CD59 CDH11 CDH2 CDH6 COL11A1 COL12A1 COL16A1 COL1A1 COL1A2 COL3A1 COL4A1 COL4A2 COL5A1 COL5A2 COL5A3 COL6A2 COL6A3 COL7A1 COL8A2 COLGALT1 COMP COPA CRLF1 CTHRC1 CXCL1 CXCL12 CXCL6 CXCL8 DAB2 DCN DKK1 DPYSL3 DST ECM1 ECM2 EDIL3 EFEMP2 ELN EMP3 ENO2 FAP FAS FBLN1 FBLN2 FBLN5 FBN1 FBN2 FERMT2 FGF2 FLNA…	200	7.64386	Extracellular Matrix Organization	GO:0030198	COL16A1;ECM2;ELN;COL11A1;COL12A1;PLOD3;CAPG;LAMC1;NID2;LOXL1;LOXL2;SERPINH1;QSOX1;PRSS2;COLGALT1;POSTN;TGFB1;MMP1;LUM;MMP2;APLP1;MMP3;COL1A1;GREM1;MMP14;COL3A1;BMP1;COL1A2;COL4A2;LOX;COL5A1;COL4A1;COL5A3;COL7A1;COL5A2;COL8A2;TGFBI;MATN3;MATN2	39	19.5	1.28e-41	2.26e-38	Extracellular Matrix Remodeling	The most prominent biological process performed by this system of interacting proteins is extracellular matrix (ECM) remodeling. The ECM is a complex network of proteins and carbohydrates that provides structural support and regulates various cellular functions. The proteins involved in this process include: 1. Collagens (COL1A1, COL1A2, COL3A1, COL4A1, COL4A2, COL5A1, COL5A2, COL5A3, COL6A2, COL…	137	68.5	The most prominent biological process performed by this system of interacting proteins is extracellular matrix (ECM) remodeling. The ECM is a complex network of proteins and carbohydrates that provides structural support and regulates various cellular functions. The proteins involved in this process include: 1. Collagens (COL1A1, COL1A2, COL3A1, COL4A1, COL4A2, COL5A1, COL5A2, COL5A3, COL6A2, COL…	0.577261	0.549402	Tied	LLM
Diff. expressed gene set	ESTROGEN RESPONSE EARLY	NA	ABAT ABCA3 ABHD2 ABLIM1 ADCY1 ADCY9 ADD3 AFF1 AKAP1 ALDH3B1 AMFR ANXA9 AQP3 AR AREG ARL3 ASB13 B4GALT1 BAG1 BCL11B BCL2 BHLHE40 BLVRB CA12 CALB2 CALCR CANT1 CBFA2T3 CCN5 CCND1 CD44 CELSR1 CELSR2 CHPT1 CISH CLDN7 CLIC3 CXCL12 CYP26B1 DEPTOR DHCR7 DHRS2 DHRS3 DLC1 DYNLT3 EGR3 ELF1 ELF3 ELOVL2 ELOVL5 ENDOD1 ESRP2 FAM102A FARP1 FASN FCMR FDFT1 FHL2 FKBP4 FKBP5 FLNB FOS FOXC1 FRK GAB2 GFRA1 GJA1 GLA G…	200	7.64386	Vascular Transport	GO:0010232	SLC7A5;SLC9A3R1;SLC22A5;SLC24A3;SLC16A1;SLC1A1;SLC2A1;SLC1A4;SLC7A2	9	4.5	1.45e-07	0.000142	Cell Proliferation and Differentiation	The interacting proteins in this system are involved in various aspects of cell proliferation, differentiation, and survival. Key proteins include: 1. CCND1: Cyclin D1 is a regulatory subunit of CDK4/6, which promotes cell cycle progression from G1 to S phase. Overexpression of CCND1 is associated with various cancers. 2. MYC: A transcription factor that regulates cell growth, proliferation, and …	10	5	The interacting proteins in this system are involved in various aspects of cell proliferation, differentiation, and survival. Key proteins include: 1. CCND1: Cyclin D1 is a regulatory subunit of CDK4/6, which promotes cell cycle progression from G1 to S phase. Overexpression of CCND1 is associated with various cancers.[1][2][3] 2. MYC: A transcription factor that regulates cell growth, proliferat…	0.350957	0.295868	Neither	Neither
Diff. expressed gene set	ESTROGEN RESPONSE LATE	NA	ABCA3 ABHD2 ACOX2 ADD3 AFF1 AGR2 ALDH3A2 ALDH3B1 AMFR ANXA9 AREG ARL3 ASCL1 ASS1 ATP2B4 BAG1 BATF BCL2 BLVRB BTG3 CA12 CA2 CACNA2D2 CALCR CAV1 CCN5 CCNA1 CCND1 CD44 CD9 CDC20 CDC6 CDH1 CELSR2 CHPT1 CHST8 CISH CKB CLIC3 COX6C CPE CXCL12 CXCL14 CYP26B1 CYP4F11 DCXR DHCR7 DHRS2 DLG5 DNAJC1 DNAJC12 DUSP2 DYNLT3 EGR3 ELOVL5 EMP2 ETFB FABP5 FAM102A FARP1 FDFT1 FGFR3 FKBP4 FKBP5 FLNB FOS FOXC1 FRK GAL G…	200	7.64386	Transport Across Blood-Brain Barrier	GO:0150104	SLC7A5;SLC9A3R1;SLC22A5;SLC24A3;SLC16A1;FABP5;ATP2B4;SLC1A4;SLC29A1	9	4.5	1.78e-07	0.000351	Cell Proliferation and Differentiation	The system of interacting proteins primarily performs the biological process of cell proliferation and differentiation. This is supported by the following points: 1. Presence of cell cycle regulators: Proteins such as CCNA1, CCND1, CDC20, and CDC6 are involved in cell cycle regulation, promoting cell proliferation. 2. Involvement of growth factors and receptors: Proteins like AREG, FGFR3, and IL6…	32	16	The system of interacting proteins primarily performs the biological process of cell proliferation and differentiation. This is supported by the following points: 1. Presence of cell cycle regulators: Proteins such as CCNA1, CCND1, CDC20, and CDC6 are involved in cell cycle regulation, promoting cell proliferation.[1][2][3] 2. Involvement of growth factors and receptors: Proteins like AREG, FGFR3…	0.336465	0.258235	Neither	Neither
Diff. expressed gene set	FATTY ACID METABOLISM	NA	AADAT ACAA1 ACAA2 ACADL ACADM ACADS ACADVL ACAT2 ACO2 ACOT2 ACOT8 ACOX1 ACSL1 ACSL4 ACSL5 ACSM3 ACSS1 ADH1C ADH7 ADIPOR2 ADSL ALAD ALDH1A1 ALDH3A1 ALDH3A2 ALDH9A1 ALDOA AOC3 APEX1 AQP7 AUH BCKDHB BLVRA BMPR1B BPHL CA2 CA4 CA6 CBR1 CBR3 CD1D CD36 CEL CIDEA CPOX CPT1A CPT2 CRAT CRYZ CYP1A1 CYP4A11 CYP4A22 D2HGDH DECR1 DHCR24 DLD DLST ECH1 ECHS1 ECI1 ECI2 EHHADH ELOVL5 ENO2 ENO3 EPHX1 ERP29 ETFDH FA…	158	7.30378	Fatty Acid Beta-Oxidation	GO:0006635	GCDH;ACADVL;ACOT8;ACAA2;ECHS1;ECI1;ECI2;ETFDH;HSD17B4;HSD17B10;ACAT2;HADHB;ACADL;AUH;CPT2;ACOX1;EHHADH;ACADM;ACAA1;ACADS;CRAT;DECR1	22	13.9241	5.07e-34	4.76e-31	Fatty Acid Metabolism and Oxidation	The system of interacting proteins primarily involves fatty acid metabolism and oxidation. The following points support this conclusion: 1. Presence of key enzymes in fatty acid metabolism: The system includes proteins such as ACSL1, ACSL4, ACSL5 (acyl-CoA synthetases), ACADM, ACADS, ACADVL (acyl-CoA dehydrogenases), and CPT1A, CPT2 (carnitine palmitoyltransferases), which are crucial for fatty a…	23	14.557	The system of interacting proteins primarily involves fatty acid metabolism and oxidation. The following points support this conclusion: 1. Presence of key enzymes in fatty acid metabolism: The system includes proteins such as ACSL1, ACSL4, ACSL5 (acyl-CoA synthetases), ACADM, ACADS, ACADVL (acyl-CoA dehydrogenases), and CPT1A, CPT2 (carnitine palmitoyltransferases), which are crucial for fatty a…	0.908654	0.742284	LLM	LLM
Diff. expressed gene set	G2M CHECKPOINT	NA	ABL1 AMD1 ARID4A ATF5 ATRX AURKA AURKB BARD1 BCL3 BIRC5 BRCA2 BUB1 BUB3 CASP8AP2 CBX1 CCNA2 CCNB2 CCND1 CCNF CCNT1 CDC20 CDC25A CDC25B CDC27 CDC45 CDC6 CDC7 CDK1 CDK4 CDKN1B CDKN2C CDKN3 CENPA CENPE CENPF CHAF1A CHEK1 CHMP1A CKS1B CKS2 CTCF CUL1 CUL3 CUL4A CUL5 DBF4 DDX39A DKC1 DMD DR1 DTYMK E2F1 E2F2 E2F3 E2F4 EFNA5 EGF ESPL1 EWSR1 EXO1 EZH2 FANCC FBXO5 FOXN3 G3BP1 GINS2 GSPT1 H2AX H2AZ1 H2AZ2 H…	200	7.64386	Mitotic Cell Cycle Phase Transition	GO:0044772	CDKN1B;CUL5;CUL3;CCNF;CUL1;GSPT1;AURKA;CCNB2;CCND1;MYC;CDC27;E2F1;E2F3;POLE;UBE2C;PLK1;CDC7;CDC25A;CDC25B;CCNA2;CUL4A;DBF4;CDK4;UBE2S;CDK1;TACC3;CDKN3	27	13.5	3.9e-30	5.87e-27	Cell Cycle Regulation	The system of interacting proteins primarily performs the biological process of cell cycle regulation. This is evident from the presence of key proteins involved in various stages of the cell cycle, including DNA replication, mitosis, and cell division. 1. DNA replication: Proteins such as CDC6, CDC7, MCM2, MCM3, MCM5, and MCM6 are essential for the initiation and elongation of DNA replication. C…	64	32	The system of interacting proteins primarily performs the biological process of cell cycle regulation. This is evident from the presence of key proteins involved in various stages of the cell cycle, including DNA replication, mitosis, and cell division. 1. DNA replication: Proteins such as CDC6, CDC7, MCM2, MCM3, MCM5, and MCM6 are essential for the initiation and elongation of DNA replication. C…	0.48391	0.615919	GO	GO
Diff. expressed gene set	GLYCOLYSIS	NA	ABCB6 ADORA2B AGL AGRN AK3 AK4 AKR1A1 ALDH7A1 ALDH9A1 ALDOA ALDOB ALG1 ANG ANGPTL4 ANKZF1 ARPP19 ARTN AURKA B3GALT6 B3GAT1 B3GAT3 B3GNT3 B4GALT1 B4GALT2 B4GALT4 B4GALT7 BIK BPNT1 CACNA1H CAPN5 CASP6 CD44 CDK1 CENPA CHPF CHPF2 CHST1 CHST12 CHST2 CHST4 CHST6 CITED2 CLDN3 CLDN9 CLN6 COG2 COL5A1 COPB2 CTH CXCR4 CYB5A DCN DDIT4 DEPDC1 DLD DPYSL4 DSC2 ECD EFNA3 EGFR EGLN3 ELF3 ENO1 ENO2 ERO1A EXT1 EXT2…	200	7.64386	Pyruvate Metabolic Process	GO:0006090	PFKFB1;TPI1;PGAM1;PGAM2;ENO1;ENO2;HK2;LDHC;LDHA;PKM;ME1;GAPDHS;PGK1;ME2;ALDOB;DLD	16	8	1.99e-20	2.81e-17	Glycolysis and Glycogenesis Regulation	The system of interacting proteins primarily involves the regulation of glycolysis and glycogenesis, two critical metabolic pathways in cellular energy production and storage. The proteins involved in these processes include ALDOA, ALDOB, ENO1, ENO2, G6PD, GAPDHS, GYS1, GYS2, HK2, LDHA, LDHC, PFKFB1, PFKP, PGAM1, PGAM2, PGK1, PGLS, PGM2, PKM, PYGB, PYGL, TPI1, and UGP2. Reasoning and Supporting I…	24	12	The system of interacting proteins primarily involves the regulation of glycolysis and glycogenesis, two critical metabolic pathways in cellular energy production and storage. The proteins involved in these processes include ALDOA, ALDOB, ENO1, ENO2, G6PD, GAPDHS, GYS1, GYS2, HK2, LDHA, LDHC, PFKFB1, PFKP, PGAM1, PGAM2, PGK1, PGLS, PGM2, PKM, PYGB, PYGL, TPI1, and UGP2.[1][2][3] 1. Glycolysis reg…	0.691575	0.596688	LLM	LLM
Diff. expressed gene set	HEDGEHOG SIGNALING	NA	ACHE ADGRG1 AMOT CDK5R1 CDK6 CELSR1 CNTFR CRMP1 DPYSL2 ETS2 GLI1 HEY1 HEY2 L1CAM LDB1 MYH9 NF1 NKX6-1 NRCAM NRP1 NRP2 OPHN1 PLG PML PTCH1 RASA1 RTN1 SCG2 SHH SLIT1 THY1 TLE1 TLE3 UNC5C VEGFA VLDLR	36	5.16993	Nervous System Development	GO:0007399	CNTFR;SHH;LDB1;OPHN1;NF1;CRMP1;NRCAM;VLDLR;L1CAM;CELSR1;VEGFA	11	30.5556	1.59e-10	7.36e-08	Neuronal Development and Axon Guidance	The primary biological process performed by this system of interacting proteins is neuronal development and axon guidance. The proteins involved in this process are crucial for the proper formation and functioning of the nervous system. 1. Axon guidance: Proteins such as L1CAM, NRCAM, SLIT1, UNC5C, NRP1, NRP2, and VLDLR are involved in axon guidance, which is essential for the correct wiring of t…	36	100	The primary biological process performed by this system of interacting proteins is neuronal development and axon guidance. The proteins involved in this process are crucial for the proper formation and functioning of the nervous system. 1. Axon guidance: Proteins such as L1CAM, NRCAM, SLIT1, UNC5C, NRP1, NRP2, and VLDLR are involved in axon guidance, which is essential for the correct wiring of t…	0.359402	0.369234	Neither	Neither
Diff. expressed gene set	HEME METABOLISM	NA	ABCB6 ABCG2 ACKR1 ACP5 ACSL6 ADD1 ADD2 ADIPOR1 AGPAT4 AHSP ALAD ALAS2 ALDH1L1 ALDH6A1 ANK1 AQP3 ARHGEF12 ARL2BP ASNS ATG4A ATP6V0A1 BACH1 BCAM BLVRA BLVRB BMP2K BNIP3L BPGM BSG BTG2 BTRC C3 CA1 CA2 CAST CAT CCDC28A CCND3 CDC27 CDR2 CIR1 CLCN3 CLIC2 CPOX CROCCP2 CTNS CTSB CTSE DAAM1 DCAF10 DCAF11 DCUN1D1 DMTN E2F2 EIF2AK1 ELL2 ENDOD1 EPB41 EPB42 EPOR ERMAP EZH1 FBXO34 FBXO7 FBXO9 FECH FN3K FOXJ2 F…	200	7.64386	Heme Biosynthetic Process	GO:0006783	ALAD;SLC25A38;ALAS2;ABCB6;FECH;UROD;UROS;HMBS;CPOX;NFE2L1	10	5	6.81e-16	8.08e-13	Erythropoiesis	The most prominent biological process performed by this system of interacting proteins is erythropoiesis, the production of red blood cells (RBCs). This process is essential for oxygen transport and maintaining homeostasis in the body. Key proteins involved in erythropoiesis include: 1. GATA1: A transcription factor that regulates the expression of genes involved in RBC development, such as HBB, …	19	9.5	The most prominent biological process performed by this system of interacting proteins is erythropoiesis, the production of red blood cells (RBCs). This process is essential for oxygen transport and maintaining homeostasis in the body. Key proteins involved in erythropoiesis include: 1. GATA1: A transcription factor that regulates the expression of genes involved in RBC development, such as HBB, …	0.568049	0.788357	GO	Tied
Diff. expressed gene set	HYPOXIA	NA	ACKR3 ADM ADORA2B AK4 AKAP12 ALDOA ALDOB ALDOC AMPD3 ANGPTL4 ANKZF1 ANXA2 ATF3 ATP7A B3GALT6 B4GALNT2 BCAN BCL2 BGN BHLHE40 BNIP3L BRS3 BTG1 CA12 CASP6 CAV1 CAVIN1 CAVIN3 CCN1 CCN2 CCN5 CCNG2 CDKN1A CDKN1B CDKN1C CHST2 CHST3 CITED2 COL5A1 CP CSRP2 CXCR4 DCN DDIT3 DDIT4 DPYSL4 DTNA DUSP1 EDN2 EFNA1 EFNA3 EGFR ENO1 ENO2 ENO3 ERO1A ERRFI1 ETS1 EXT1 F3 FAM162A FBP1 FOS FOSL2 FOXO3 GAA GALK1 GAPDH GAP…	200	7.64386	Glycolytic Process	GO:0006096	GPI;TPI1;PKLR;PGAM2;ENO1;ENO2;ENO3;HK2;GCK;HK1;LDHA;PFKL;PGK1;GAPDHS;ALDOC;ALDOB;GAPDH;PGM1	18	9	1.44e-29	2.62e-26	Glycolysis and Angiogenesis Regulation	The interacting proteins in this system are primarily involved in glycolysis and angiogenesis regulation. Glycolysis is a crucial metabolic pathway for energy production, while angiogenesis is the formation of new blood vessels from pre-existing ones. Glycolysis-related proteins: 1. ALDOA, ALDOB, and ALDOC are aldolase enzymes that catalyze the conversion of fructose-1,6-bisphosphate to glycerald…	42	21	The interacting proteins in this system are primarily involved in glycolysis and angiogenesis regulation. Glycolysis is a crucial metabolic pathway for energy production, while angiogenesis is the formation of new blood vessels from pre-existing ones. 1. ALDOA, ALDOB, and ALDOC are aldolase enzymes that catalyze the conversion of fructose-1,6-bisphosphate to glyceraldehyde-3-phosphate and dihydro…	0.405202	0.360279	Tied	LLM
Diff. expressed gene set	IL2 STAT5 SIGNALING	NA	ABCB1 ADAM19 AGER AHCY AHNAK AHR ALCAM AMACR ANXA4 APLP1 ARL4A BATF BATF3 BCL2 BCL2L1 BHLHE40 BMP2 BMPR2 CA2 CAPG CAPN3 CASP3 CCND2 CCND3 CCNE1 CCR4 CD44 CD48 CD79B CD81 CD83 CD86 CDC42SE2 CDC6 CDCP1 CDKN1C CISH CKAP4 COCH COL6A1 CSF1 CSF2 CST7 CTLA4 CTSZ CXCL10 CYFIP1 DCPS DENND5A DHRS3 DRC1 ECM1 EEF1AKMT1 EMP1 ENO3 ENPP1 EOMES ETFBKMT ETV4 F2RL2 FAH FGL2 FLT3LG FURIN GABARAPL1 GADD45B GALM GATA…	199	7.63662	Regulation Of Apoptotic Process	GO:0042981	GATA1;IGF1R;SOCS2;CCND2;MYC;CASP3;TNFSF10;PIM1;CTLA4;CAPN3;TNFRSF8;PHLDA1;TGM2;IL10;XBP1;GADD45B;ANXA4;RHOB;CXCL10;BMP2;IL2RB;BCL2;ITGA6;CD44;BCL2L1	25	12.5628	3.83e-08	6.48e-05	Cell Signaling and Immune Regulation	The system of interacting proteins primarily performs cell signaling and immune regulation processes. The proteins involved in these processes include: 1. Cell Signaling: Proteins such as AHR, BCL2, BCL2L1, BMP2, BMPR2, CASP3, CCND2, CCND3, CCNE1, CD44, CD81, CD83, CD86, CDC42SE2, CDC6, CDKN1C, CXCL10, ETV4, F2RL2, FLT3LG, GPR65, GPR83, IGF1R, IGF2R, IL10, IL10RA, IL13, IL18R1, IL1R2, IL1RL1, IL2…	168	84.4221	The system of interacting proteins primarily performs cell signaling and immune regulation processes. The proteins involved in these processes include: 1. Cell Signaling: Proteins such as AHR, BCL2, BCL2L1, BMP2, BMPR2, CASP3, CCND2, CCND3, CCNE1, CD44, CD81, CD83, CD86, CDC42SE2, CDC6, CDKN1C, CXCL10, ETV4, F2RL2, FLT3LG, GPR65, GPR83, IGF1R, IGF2R, IL10, IL10RA, IL13, IL18R1, IL1R2, IL1RL1, IL2…	0.541109	0.160827	LLM	Neither
Diff. expressed gene set	IL6 JAK STAT3 SIGNALING	NA	A2M ACVR1B ACVRL1 BAK1 CBL CCL7 CCR1 CD14 CD36 CD38 CD44 CD9 CNTFR CRLF2 CSF1 CSF2 CSF2RA CSF2RB CSF3R CXCL1 CXCL10 CXCL11 CXCL13 CXCL3 CXCL9 DNTT EBI3 FAS GRB2 HAX1 HMOX1 IFNAR1 IFNGR1 IFNGR2 IL10RB IL12RB1 IL13RA1 IL15RA IL17RA IL17RB IL18R1 IL1B IL1R1 IL1R2 IL2RA IL2RG IL3RA IL4R IL6 IL6ST IL7 IL9R INHBE IRF1 IRF9 ITGA4 ITGB3 JUN LEPR LTB LTBR MAP3K8 MYD88 OSMR PDGFC PF4 PIK3R5 PIM1 PLA2G2A PT…	87	6.44294	Cytokine-Mediated Signaling Pathway	GO:0019221	CNTFR;CXCL9;CSF3R;CSF2;EBI3;CXCL1;CSF2RB;CXCL13;IL2RG;CXCL3;CBL;TNF;CSF2RA;SOCS1;CCL7;LEPR;IL12RB1;IL13RA1;CCR1;IL15RA;IL4R;IL1R1;STAT1;STAT3;PTPN11;TYK2;OSMR;TNFRSF1B;TNFRSF1A;IL17RA;CXCL10;CXCL11;IL6;IL7;IL1B;IL2RA;IL3RA;IL6ST;IL9R;IL18R1;MYD88;PF4;CRLF2	43	49.4253	9.94e-59	1.3e-55	Cytokine Signaling and Regulation	The primary biological process performed by this system of interacting proteins is cytokine signaling and regulation. The proteins involved in this system play crucial roles in immune response, inflammation, and cellular communication. 1. Cytokine receptors and ligands: The presence of multiple cytokine receptors (e.g., IL2RA, IL4R, IL6ST, IL9R, IL17RA, IL17RB, IL18R1, IL1R1, IL1R2, CSF2RA, CSF2R…	71	81.6092	The primary biological process performed by this system of interacting proteins is cytokine signaling and regulation. The proteins involved in this system play crucial roles in immune response, inflammation, and cellular communication. 1. Cytokine receptors and ligands: The presence of multiple cytokine receptors (e.g., IL2RA, IL4R, IL6ST, IL9R, IL17RA, IL17RB, IL18R1, IL1R1, IL1R2, CSF2RA, CSF2R…	0.665165	0.658058	Tied	Tied
Diff. expressed gene set	INFLAMMATORY RESPONSE	NA	ABCA1 ABI1 ACVR1B ACVR2A ADGRE1 ADM ADORA2B ADRM1 AHR APLNR AQP9 ATP2A2 ATP2B1 ATP2C1 AXL BDKRB1 BEST1 BST2 BTG2 C3AR1 C5AR1 CALCRL CCL17 CCL2 CCL20 CCL22 CCL24 CCL5 CCL7 CCR7 CCRL2 CD14 CD40 CD48 CD55 CD69 CD70 CD82 CDKN1A CHST2 CLEC5A CMKLR1 CSF1 CSF3 CSF3R CX3CL1 CXCL10 CXCL11 CXCL6 CXCL8 CXCL9 CXCR6 CYBB DCBLD2 EBI3 EDN1 EIF2AK2 EMP3 EREG F3 FFAR2 FPR1 FZD5 GABBR1 GCH1 GNA15 GNAI3 GP1BA GPC3 …	200	7.64386	Inflammatory Response	GO:0006954	PTGER4;CXCL6;CD40;CXCL9;CXCL8;TNFAIP6;PTGER2;C5AR1;FPR1;ADM;MEFV;CX3CL1;RELA;CCL7;IRAK2;CCL5;CCRL2;C3AR1;PROK2;OLR1;NLRP3;CCL2;CCR7;CD14;CCL17;CMKLR1;CCL24;PTGIR;CCL22;CCL20;RIPK2;IL18;CYBB;TACR1;SELE;NFKB1;TLR1;IL1A;CXCL10;CXCL11;IL6;IL1B;TLR3;TLR2	44	22	1.9e-43	3.73e-40	Inflammatory Response and Immune Regulation	The system of interacting proteins primarily performs the biological process of inflammatory response and immune regulation. The following points support this conclusion: 1. Presence of cytokines and chemokines: The system includes several cytokines (IL10, IL12B, IL15, IL18, IL1A, IL1B, IL6, LIF, OSM) and chemokines (CCL17, CCL2, CCL20, CCL22, CCL24, CCL5, CCL7, CX3CL1, CXCL10, CXCL11, CXCL6, CXC…	89	44.5	The system of interacting proteins primarily performs the biological process of inflammatory response and immune regulation. The following points support this conclusion: 1. Presence of cytokines and chemokines: The system includes several cytokines (IL10, IL12B, IL15, IL18, IL1A, IL1B, IL6, LIF, OSM) and chemokines (CCL17, CCL2, CCL20, CCL22, CCL24, CCL5, CCL7, CX3CL1, CXCL10, CXCL11, CXCL6, CXC…	0.86391	1	GO	GO
Diff. expressed gene set	INTERFERON ALPHA RESPONSE	NA	ADAR B2M BATF2 BST2 C1S CASP1 CASP8 CCRL2 CD47 CD74 CMPK2 CMTR1 CNP CSF1 CXCL10 CXCL11 DDX60 DHX58 EIF2AK2 ELF1 EPSTI1 GBP2 GBP4 GMPR HELZ2 HERC6 HLA-C IFI27 IFI30 IFI35 IFI44 IFI44L IFIH1 IFIT2 IFIT3 IFITM1 IFITM2 IFITM3 IL15 IL4R IL7 IRF1 IRF2 IRF7 IRF9 ISG15 ISG20 LAMP3 LAP3 LGALS3BP LPAR6 LY6E MOV10 MVB12A MX1 NCOA7 NMI NUB1 OAS1 OASL OGFR PARP12 PARP14 PARP9 PLSCR1 PNPT1 PROCR PSMA3 PSMB8 PS…	97	6.59991	Defense Response To Virus	GO:0051607	IFITM3;RTP4;IFITM1;IFITM2;DDX60;USP18;IFI44L;IFIT3;IFIT2;OASL;IFIH1;TRIM5;DHX58;CASP1;TRIM25;TRIM26;GBP2;TRIM21;RSAD2;STAT2;MX1;EIF2AK2;ISG15;ISG20;BST2;CXCL10;MOV10;PLSCR1;IFI27;OAS1;IRF1;IRF2;IRF7	33	34.0206	4.35e-43	3.29e-40	Antiviral Immune Response	The system of interacting proteins primarily performs the biological process of antiviral immune response. This is supported by the presence of several key proteins involved in the innate immune response against viral infections. 1. Interferon-induced proteins: Many proteins in the system, such as IFI27, IFI35, IFI44, IFI44L, IFIH1, IFIT2, IFIT3, IFITM1, IFITM2, IFITM3, ISG15, and ISG20, are indu…	34	35.0515	The system of interacting proteins primarily performs the biological process of antiviral immune response. This is supported by the presence of several key proteins involved in the innate immune response against viral infections. 1. Interferon-induced proteins: Many proteins in the system, such as IFI27, IFI35, IFI44, IFI44L, IFIH1, IFIT2, IFIT3, IFITM1, IFITM2, IFITM3, ISG15, and ISG20, are indu…	0.693852	0.578796	LLM	Tied
Diff. expressed gene set	INTERFERON GAMMA RESPONSE	NA	ADAR APOL6 ARID5B ARL4A AUTS2 B2M BANK1 BATF2 BPGM BST2 BTG1 C1R C1S CASP1 CASP3 CASP4 CASP7 CASP8 CCL2 CCL5 CCL7 CD274 CD38 CD40 CD69 CD74 CD86 CDKN1A CFB CFH CIITA CMKLR1 CMPK2 CMTR1 CSF2RB CXCL10 CXCL11 CXCL9 DDX60 DHX58 EIF2AK2 EIF4E3 EPSTI1 FAS FCGR1A FGL2 FPR1 GBP4 GBP6 GCH1 GPR18 GZMA HELZ2 HERC6 HIF1A HLA-A HLA-B HLA-DMA HLA-DQA1 HLA-DRB1 HLA-G ICAM1 IDO1 IFI27 IFI30 IFI35 IFI44 IFI44L IF…	200	7.64386	Defense Response To Virus	GO:0051607	IFITM3;RTP4;CD40;IFITM2;NLRC5;IFIT1;DDX60;SAMHD1;USP18;IFI44L;IFIT3;IFIT2;OASL;IFIH1;DHX58;CASP1;TRIM25;TRIM26;TRIM21;IFNAR2;RSAD2;STAT1;MX2;STAT2;MX1;EIF2AK2;ISG15;PML;BST2;ISG20;CXCL10;IL6;PLSCR1;ZNFX1;IFI27;OAS2;IRF1;OAS3;IRF2;IRF7;MYD88;RIGI	42	21	6.72e-45	1.1e-41	Immune Response Regulation	The system of interacting proteins primarily performs the biological process of immune response regulation. This is supported by the presence of proteins involved in various aspects of the immune response, including cytokine signaling, antigen presentation, and interferon response. 1. Cytokine signaling: Proteins such as IL6, IL15, IL18BP, and IL10RA are involved in cytokine signaling, which modu…	38	19	The system of interacting proteins primarily performs the biological process of immune response regulation. This is supported by the presence of proteins involved in various aspects of the immune response, including cytokine signaling, antigen presentation, and interferon response. 1. Cytokine signaling: Proteins such as IL6, IL15, IL18BP, and IL10RA are involved in cytokine signaling, which modu…	0.600703	0.525906	LLM	Tied
Diff. expressed gene set	KRAS SIGNALING DN	NA	ABCB11 ABCG4 ACTC1 ADRA2C AKR1B10 ALOX12B AMBN ARHGDIG ARPP21 ASB7 ATP4A ATP6V1B1 BARD1 BMPR1B BRDT BTG2 C5 CACNA1F CACNG1 CALCB CALML5 CAMK1D CAPN9 CCDC106 CCNA1 CCR8 CD207 CD40LG CD80 CDH16 CDKAL1 CELSR2 CHRNG CHST2 CKM CLDN16 CLDN8 CLPS CLSTN3 CNTFR COL2A1 COPZ2 COQ8A CPA2 CPB1 CPEB3 CYP11B2 CYP39A1 DCC DLK2 DTNB EDAR EDN1 EDN2 EFHD1 EGF ENTPD7 EPHA5 FGF16 FGF22 FGFR3 FGGY FSHB GAMT GDNF GP1BA…	200	7.64386	Muscle Contraction	GO:0006936	RYR1;GAMT;RYR2;P2RX6;SMPX;CHRNG;MYOT;NOS1;MYH7	9	4.5	4.27e-07	0.000696	Ion Transport Regulation	The most prominent biological process performed by this system of interacting proteins is the regulation of ion transport. This is supported by the presence of several key proteins involved in ion transport and regulation, such as ATP4A, ATP6V1B1, CACNA1F, CACNG1, KCND1, KCNE2, KCNMB1, KCNN1, KCNQ2, and SLC12A3. 1. ATP4A and ATP6V1B1 are subunits of ATPases involved in proton transport. ATP4A is …	10	5	The most prominent biological process performed by this system of interacting proteins is the regulation of ion transport. This is supported by the presence of several key proteins involved in ion transport and regulation, such as ATP4A, ATP6V1B1, CACNA1F, CACNG1, KCND1, KCNE2, KCNMB1, KCNN1, KCNQ2, and SLC12A3.[1][2][3] 1. ATP4A and ATP6V1B1 are subunits of ATPases involved in proton transport. …	0.289856	0.144511	Neither	Neither
Diff. expressed gene set	KRAS SIGNALING UP	NA	ABCB1 ACE ADAM17 ADAM8 ADAMDEC1 ADGRA2 ADGRL4 AKAP12 AKT2 ALDH1A2 ALDH1A3 AMMECR1 ANGPTL4 ANKH ANO1 ANXA10 APOD ARG1 ATG10 AVL9 BIRC3 BMP2 BPGM BTBD3 BTC C3AR1 CA2 CAB39L CBL CBR4 CBX8 CCL20 CCND2 CCSER2 CD37 CDADC1 CFB CFH CFHR2 CIDEA CLEC4A CMKLR1 CPE CROT CSF2 CSF2RA CTSS CXCL10 CXCR4 DCBLD2 DNMBP DOCK2 DUSP6 EMP1 ENG EPB41L3 EPHB2 EREG ERO1A ETS1 ETV1 ETV4 ETV5 EVI5 F13A1 F2RL1 FBXO4 FCER1G F…	200	7.64386	Positive Regulation Of Protein Modification Process	GO:0031401	ACE;FLT4;ATG10;IGF2;PLAUR;MMP9;ADAM17;BMP2;RELN;CCND2;GPNMB;FGF9;AKT2;IL1B;PECAM1;SOX9;ENG	17	8.5	1.2e-10	1.33e-07	Inflammation and Extracellular Matrix Remodeling	The system of interacting proteins primarily involves biological processes related to inflammation and extracellular matrix (ECM) remodeling. Key proteins in these processes include: 1. Inflammation: - IL1B, IL33, and IL10RA: These proteins are involved in the regulation of inflammatory responses. IL1B and IL33 are pro-inflammatory cytokines, while IL10RA is a receptor for the anti-inflammatory c…	22	11	The system of interacting proteins primarily involves biological processes related to inflammation and extracellular matrix (ECM) remodeling. Key proteins in these processes include: - IL1B, IL33, and IL10RA: These proteins are involved in the regulation of inflammatory responses. IL1B and IL33 are pro-inflammatory cytokines, while IL10RA is a receptor for the anti-inflammatory cytokine IL10.[1][…	0.301423	0.204763	Neither	Neither
Diff. expressed gene set	MITOTIC SPINDLE	NA	ABI1 ABL1 ABR ACTN4 AKAP13 ALMS1 ALS2 ANLN APC ARAP3 ARF6 ARFGEF1 ARFIP2 ARHGAP10 ARHGAP27 ARHGAP29 ARHGAP4 ARHGAP5 ARHGDIA ARHGEF11 ARHGEF12 ARHGEF2 ARHGEF3 ARHGEF7 ARL8A ATG4B AURKA BCAR1 BCL2L11 BCR BIN1 BIRC5 BRCA2 BUB1 CAPZB CCDC88A CCNB2 CD2AP CDC27 CDC42 CDC42BPA CDC42EP1 CDC42EP2 CDC42EP4 CDK1 CDK5RAP2 CENPE CENPF CENPJ CEP131 CEP192 CEP250 CEP57 CEP72 CKAP5 CLASP1 CLIP1 CLIP2 CNTRL CNTRO…	199	7.63662	Mitotic Spindle Organization	GO:0007052	SUN2;DYNC1H1;MAP1S;PLK1;KIF23;TTK;KIF11;SMC3;SMC1A;CKAP5;NDC80;AURKA;CENPE;TPX2;KIF3B;INCENP;PRC1;KIF4A;BIRC5;FLNA;CEP192;PCNT;DLGAP5;CLASP1	24	12.0603	1.13e-28	1.66e-25	Regulation of Cytoskeleton Dynamics and Cell Division	The interacting proteins in this system are primarily involved in the regulation of cytoskeleton dynamics and cell division. Key proteins and their roles are as follows: 1. Actin-binding proteins: ACTN4, CAPZB, FSCN1, and GSN regulate actin filament organization and dynamics, contributing to cell shape, motility, and adhesion. 2. Rho GTPase regulators: ARHGAP10, ARHGAP27, ARHGAP29, ARHGAP4, ARHGA…	85	42.7136	The interacting proteins in this system are primarily involved in the regulation of cytoskeleton dynamics and cell division. Key proteins and their roles are as follows: 1. Actin-binding proteins: ACTN4, CAPZB, FSCN1, and GSN regulate actin filament organization and dynamics, contributing to cell shape, motility, and adhesion.[1][2][3] 2. Rho GTPase regulators: ARHGAP10, ARHGAP27, ARHGAP29, ARHGA…	0.392029	0.835926	GO	GO
Diff. expressed gene set	MTORC1 SIGNALING	NA	ABCF2 ACACA ACLY ACSL3 ACTR2 ACTR3 ADD3 ADIPOR2 AK4 ALDOA ARPC5L ASNS ATP2A2 ATP5MC1 ATP6V1D AURKA BCAT1 BHLHE40 BTG2 BUB1 CACYBP CALR CANX CCNF CCNG1 CCT6A CD9 CDC25A CDKN1A CFP COPS5 CORO1A CTH CTSC CXCR4 CYB5B CYP51A1 DAPP1 DDIT3 DDIT4 DDX39A DHCR24 DHCR7 DHFR EBP EDEM1 EEF1E1 EGLN3 EIF2S2 ELOVL5 ELOVL6 ENO1 EPRS1 ERO1A ETF1 FADS1 FADS2 FDXR FGL2 FKBP2 G6PD GAPDH GBE1 GCLC GGA2 GLA GLRX GMPS G…	200	7.64386	Cholesterol Biosynthetic Process	GO:0006695	ACLY;G6PD;HMGCS1;INSIG1;CYP51A1;SC5D;DHCR24;HMGCR;DHCR7;TM7SF2	10	5	2.29e-14	3.64e-11	Cholesterol Biosynthesis and Cellular Energy Metabolism	The interacting proteins in this system are primarily involved in cholesterol biosynthesis, cellular energy metabolism, and protein folding. The most prominent biological process performed by the system is cholesterol biosynthesis and cellular energy metabolism. 1. Cholesterol biosynthesis: Several proteins in the system are key enzymes in the cholesterol biosynthesis pathway, including HMGCR (3-…	14	7	The interacting proteins in this system are primarily involved in cholesterol biosynthesis, cellular energy metabolism, and protein folding. The most prominent biological process performed by the system is cholesterol biosynthesis and cellular energy metabolism. 1. Cholesterol biosynthesis: Several proteins in the system are key enzymes in the cholesterol biosynthesis pathway, including HMGCR (3-…	0.350647	0.2216	Neither	Tied
Diff. expressed gene set	MYC TARGETS V1	NA	ABCE1 ACP1 AIMP2 AP3S1 APEX1 BUB3 C1QBP CAD CANX CBX3 CCNA2 CCT2 CCT3 CCT4 CCT5 CCT7 CDC20 CDC45 CDK2 CDK4 CLNS1A CNBP COPS5 COX5A CSTF2 CTPS1 CUL1 CYC1 DDX18 DDX21 DEK DHX15 DUT EEF1B2 EIF1AX EIF2S1 EIF2S2 EIF3B EIF3D EIF3J EIF4A1 EIF4E EIF4G2 EIF4H EPRS1 ERH ETF1 EXOSC7 FAM120A FBL G3BP1 GLO1 GNL3 GOT2 GSPT1 H2AZ1 HDAC2 HDDC2 HDGF HNRNPA1 HNRNPA2B1 HNRNPA3 HNRNPC HNRNPD HNRNPR HNRNPU HPRT1 HSP9…	200	7.64386	mRNA Splicing, Via Spliceosome	GO:0000398	SF3B3;SRSF1;HNRNPU;HNRNPR;U2AF1;SYNCRIP;SNRPD2;SNRPD1;TRA2B;DHX15;SNRPB2;SNRPD3;TXNL4A;HNRNPA1;SF3A1;HNRNPA3;NCBP1;NCBP2;SRPK1;LSM2;LSM7;CLNS1A;HNRNPA2B1;SNRPG;SRSF2;SRSF3;RNPS1;PRPF31;SNRPA1;HNRNPC;PABPC1;SRSF7;SNRPA	33	16.5	6.01e-30	7.37e-27	Protein Synthesis and Cell Cycle Regulation	The system of interacting proteins primarily performs the biological processes of protein synthesis and cell cycle regulation. Protein Synthesis: 1. Translation initiation factors: EIF1AX, EIF2S1, EIF2S2, EIF3B, EIF3D, EIF3J, EIF4A1, EIF4E, EIF4G2, EIF4H, and EPRS1 are involved in the initiation of protein synthesis. 2. Ribosomal proteins: RPL14, RPL18, RPL22, RPL34, RPL6, RPLP0, RPS10, RPS2, RPS…	70	35	The system of interacting proteins primarily performs the biological processes of protein synthesis and cell cycle regulation. 1. Translation initiation factors: EIF1AX, EIF2S1, EIF2S2, EIF3B, EIF3D, EIF3J, EIF4A1, EIF4E, EIF4G2, EIF4H, and EPRS1 are involved in the initiation of protein synthesis.[1][2][3] 2. Ribosomal proteins: RPL14, RPL18, RPL22, RPL34, RPL6, RPLP0, RPS10, RPS2, RPS3, RPS5, a…	0.316235	0.255797	Neither	Tied
Diff. expressed gene set	MYC TARGETS V2	NA	AIMP2 BYSL CBX3 CDK4 DCTPP1 DDX18 DUSP2 EXOSC5 FARSA GNL3 GRWD1 HK2 HSPD1 HSPE1 IMP4 IPO4 LAS1L MAP3K6 MCM4 MCM5 MPHOSPH10 MRTO4 MYBBP1A MYC NDUFAF4 NIP7 NOC4L NOLC1 NOP16 NOP2 NOP56 NPM1 PA2G4 PES1 PHB1 PLK1 PLK4 PPAN PPRC1 PRMT3 PUS1 RABEPK RCL1 RRP12 RRP9 SLC19A1 SLC29A2 SORD SRM SUPV3L1 TBRG4 TCOF1 TFB2M TMEM97 UNG UTP20 WDR43 WDR74	58	5.85798	Ribosome Biogenesis	GO:0042254	NOP56;NPM1;NOP16;NIP7;WDR74;NOLC1;NOC4L;WDR43;BYSL;RRP9;RCL1;EXOSC5;PES1;GRWD1;MRTO4;MPHOSPH10;UTP20;RRP12	18	31.0345	1.27e-24	6.98e-22	Ribosome Biogenesis and Cell Cycle Regulation	The primary biological process performed by this system of interacting proteins is ribosome biogenesis and cell cycle regulation. Ribosome biogenesis is essential for protein synthesis, while cell cycle regulation ensures proper cell division and growth. 1. Ribosome Biogenesis: Several proteins in this system are involved in ribosome biogenesis, including AIMP2, BYSL, DDX18, EXOSC5, FARSA, GNL3, …	46	79.3103	The primary biological process performed by this system of interacting proteins is ribosome biogenesis and cell cycle regulation. Ribosome biogenesis is essential for protein synthesis, while cell cycle regulation ensures proper cell division and growth. 1. Ribosome Biogenesis: Several proteins in this system are involved in ribosome biogenesis, including AIMP2, BYSL, DDX18, EXOSC5, FARSA, GNL3, …	0.306111	0.251972	Neither	Tied
Diff. expressed gene set	MYOGENESIS	NA	ABLIM1 ACHE ACSL1 ACTA1 ACTC1 ACTN2 ACTN3 ADAM12 ADCY9 AEBP1 AGL AGRN AK1 AKT2 ANKRD2 APLNR APOD APP ATP2A1 ATP6AP1 BAG1 BDKRB2 BHLHE40 BIN1 CACNA1H CACNG1 CAMK2B CASQ1 CASQ2 CAV3 CD36 CDH13 CDKN1A CFD CHRNA1 CHRNB1 CHRNG CKB CKM CKMT2 CLU CNN3 COL15A1 COL1A1 COL3A1 COL4A2 COL6A2 COL6A3 COX6A2 COX7A1 CRAT CRYAB CSRP3 CTF1 DAPK2 DENND2B DES DMD DMPK DTNA EFS EIF4A2 ENO3 EPHB3 ERBB3 FABP3 FDPS FGF2…	200	7.64386	Muscle Contraction	GO:0006936	RYR1;MYL6B;MYOM2;CACNA1H;MYLK;CKMT2;SGCA;CHRNG;BDKRB2;MYH11;ANKRD2;NOS1;CHRNB1;DTNA;TPM3;MYL11;TPM2;PGAM2;GNAO1;MYH1;MYH2;SMTN;MYH3;DES;SLC6A8;MYL1;TNNT2;FXYD1;CASQ2;MYH8;HRC;SSPN;MYH4;CRYAB;MYH7	35	17.5	2.04e-46	3.71e-43	Muscle Contraction and Development	The primary biological process performed by this system of interacting proteins is muscle contraction and development. The proteins involved in this process can be grouped into several categories, including structural proteins, regulatory proteins, signaling proteins, and metabolic proteins. 1. Structural proteins: These proteins provide the necessary framework for muscle contraction. Key protein…	40	20	The primary biological process performed by this system of interacting proteins is muscle contraction and development. The proteins involved in this process can be grouped into several categories, including structural proteins, regulatory proteins, signaling proteins, and metabolic proteins. 1. Structural proteins: These proteins provide the necessary framework for muscle contraction. Key protein…	0.7831	0.690581	LLM	LLM
Diff. expressed gene set	NOTCH SIGNALING	NA	APH1A ARRB1 CCND1 CUL1 DLL1 DTX1 DTX2 DTX4 FBXW11 FZD1 FZD5 FZD7 HES1 HEYL JAG1 KAT2A LFNG MAML2 NOTCH1 NOTCH2 NOTCH3 PPARD PRKCA PSEN2 PSENEN RBX1 SAP30 SKP1 ST3GAL6 TCF7L2 WNT2 WNT5A	32	5	Notch Signaling Pathway	GO:0007219	NOTCH2;APH1A;HEYL;NOTCH3;JAG1;NOTCH1;DTX1;DTX2;HES1;DTX4;DLL1	11	34.375	5.66e-23	4.08e-20	Notch Signaling Pathway	The primary biological process performed by this system of interacting proteins is the Notch signaling pathway. This pathway is crucial for cell-cell communication, cell fate determination, and tissue development. 1. Notch Receptors and Ligands: NOTCH1, NOTCH2, and NOTCH3 are transmembrane receptors that interact with membrane-bound ligands, such as JAG1 and DLL1. LFNG is a glycosyltransferase th…	32	100	The primary biological process performed by this system of interacting proteins is the Notch signaling pathway. This pathway is crucial for cell-cell communication, cell fate determination, and tissue development. 1. Notch Receptors and Ligands: NOTCH1, NOTCH2, and NOTCH3 are transmembrane receptors that interact with membrane-bound ligands, such as JAG1 and DLL1. LFNG is a glycosyltransferase th…	0.967062	0.967062	Tied	Tied
Diff. expressed gene set	OXIDATIVE PHOSPHORYLATION	NA	ABCB7 ACAA1 ACAA2 ACADM ACADSB ACADVL ACAT1 ACO2 AFG3L2 AIFM1 ALAS1 ALDH6A1 ATP1B1 ATP5F1A ATP5F1B ATP5F1C ATP5F1D ATP5F1E ATP5MC1 ATP5MC2 ATP5MC3 ATP5ME ATP5MF ATP5MG ATP5PB ATP5PD ATP5PF ATP5PO ATP6AP1 ATP6V0B ATP6V0C ATP6V0E1 ATP6V1C1 ATP6V1D ATP6V1E1 ATP6V1F ATP6V1G1 ATP6V1H BAX BCKDHA BDH2 CASP7 COX10 COX11 COX15 COX17 COX4I1 COX5A COX5B COX6A1 COX6B1 COX6C COX7A2 COX7A2L COX7B COX7C COX8A C…	200	7.64386	Cellular Respiration	GO:0045333	COX7B;COX4I1;ETFA;ETFB;COX6A1;COX7C;UQCRFS1;COX8A;NDUFC2;NDUFC1;SDHC;SDHA;SDHB;COX6B1;OXA1L;NDUFS8;NDUFS7;NDUFS6;NDUFS4;NDUFS3;UQCRC1;NDUFS2;NDUFS1;UQCRC2;NDUFB8;NDUFB7;NDUFB6;UQCRB;COX15;NDUFB5;NDUFB4;NDUFB3;ETFDH;NDUFB2;NDUFB1;COX7A2;UQCR11;UQCR10;COX5B;COX5A;UQCRH;CYC1;NDUFV2;NDUFV1;NDUFA9;NDUFA8;NDUFA7;SURF1;NDUFA6;NDUFA5;MDH2;NDUFA4;NDUFA3;NDUFA2;NDUFA1;COX6C;UQCRQ;NDUFAB1;CYCS	59	29.5	3.22e-101	2.22e-98	Oxidative Phosphorylation and TCA Cycle	The primary biological process performed by this system of interacting proteins is oxidative phosphorylation and the tricarboxylic acid (TCA) cycle. The proteins are involved in energy production, specifically in the generation of ATP through the electron transport chain (ETC) and the TCA cycle. Reasoning and Supporting Information: 1. Presence of ETC Complexes: The proteins NDUFA1-NDUFS8, NDUFV1…	52	26	The primary biological process performed by this system of interacting proteins is oxidative phosphorylation and the tricarboxylic acid (TCA) cycle. The proteins are involved in energy production, specifically in the generation of ATP through the electron transport chain (ETC) and the TCA cycle. 1. Presence of ETC Complexes: The proteins NDUFA1-NDUFS8, NDUFV1-NDUFV2, SDHA-SDHD, UQCR10-UQCRQ, COX4…	0.801169	0.722115	LLM	LLM
Diff. expressed gene set	P53 PATHWAY	NA	ABAT ABCC5 ABHD4 ACVR1B ADA AEN AK1 ALOX15B ANKRA2 APAF1 APP ATF3 BAIAP2 BAK1 BAX BLCAP BMP2 BTG1 BTG2 CASP1 CCND2 CCND3 CCNG1 CCNK CCP110 CD81 CD82 CDH13 CDK5R1 CDKN1A CDKN2A CDKN2AIP CDKN2B CEBPA CGRRF1 CLCA2 COQ8A CSRNP2 CTSD CTSF CYFIP2 DCXR DDB2 DDIT3 DDIT4 DEF6 DGKA DNTTIP2 DRAM1 EI24 ELP1 EPHA2 EPHX1 EPS8L2 ERCC5 F2R FAM162A FAS FBXW7 FDXR FGF13 FOS FOXO3 FUCA1 GADD45A GLS2 GM2A GPX2 H1-2 …	200	7.64386	Negative Regulation Of Cellular Process	GO:0048523	RB1;APP;CEBPA;BTG2;CDKN1A;BTG1;NOTCH1;EI24;PPM1D;ACVR1B;TOB1;CDKN2AIP;RRP8;SERTAD3;RACK1;HRAS;IP6K2;TSPYL2;CDKN2B;TGFB1;CDKN2A;F2R;OSGIN1;CGRRF1;ALOX15B;PTPN14;VAMP8;IL1A;BMP2;PLXNB2;CDH13;TXNIP;NUPR1;TP53	34	17	6.53e-18	1.22e-14	Cell Cycle Regulation and Apoptosis	The interacting proteins in this system are primarily involved in the regulation of the cell cycle and apoptosis. Key proteins include TP53, CDKN1A, CDKN2A, CDKN2B, CCND2, CCND3, CCNG1, CCNK, MDM2, and FAS. 1. TP53 (p53) is a tumor suppressor protein that plays a central role in cell cycle regulation and apoptosis. It is activated in response to DNA damage and other cellular stresses, leading to …	22	11	The interacting proteins in this system are primarily involved in the regulation of the cell cycle and apoptosis. Key proteins include TP53, CDKN1A, CDKN2A, CDKN2B, CCND2, CCND3, CCNG1, CCNK, MDM2, and FAS.[1][2][3] 1. TP53 (p53) is a tumor suppressor protein that plays a central role in cell cycle regulation and apoptosis. It is activated in response to DNA damage and other cellular stresses, le…	0.562633	0.254823	LLM	LLM
Diff. expressed gene set	PANCREAS BETA CELLS	NA	ABCC8 AKT3 CHGA DCX DPP4 ELP4 FOXA2 FOXO1 G6PC2 GCG GCK HNF1A IAPP INS INSM1 ISL1 LMO2 MAFB NEUROD1 NEUROG3 NKX2-2 NKX6-1 PAK3 PAX4 PAX6 PCSK1 PCSK2 PDX1 PKLR SCGN SEC11A SLC2A2 SPCS1 SRP14 SRP9 SRPRB SST STXBP1 SYT13 VDR	40	5.32193	Regulation Of Insulin Secretion	GO:0050796	CHGA;NEUROD1;G6PC2;PDX1;GCG;ISL1;GCK;FOXO1;FOXA2	9	22.5	8.93e-14	4.86e-11	Pancreatic Islet Cell Development and Function	The primary biological process performed by this system of interacting proteins is the development and function of pancreatic islet cells, which are crucial for glucose homeostasis and insulin secretion. 1. Key transcription factors involved in pancreatic islet cell development: - PDX1, NEUROD1, NEUROG3, NKX2-2, NKX6-1, ISL1, MAFB, FOXA2, and PAX4 are essential for the differentiation and maturat…	38	95	The primary biological process performed by this system of interacting proteins is the development and function of pancreatic islet cells, which are crucial for glucose homeostasis and insulin secretion. 1. Key transcription factors involved in pancreatic islet cell development: - PDX1, NEUROD1, NEUROG3, NKX2-2, NKX6-1, ISL1, MAFB, FOXA2, and PAX4 are essential for the differentiation and maturat…	0.612734	0.407769	LLM	LLM
Diff. expressed gene set	PEROXISOME	NA	ABCB1 ABCB4 ABCB9 ABCC5 ABCC8 ABCD1 ABCD2 ABCD3 ACAA1 ACOT8 ACOX1 ACSL1 ACSL4 ACSL5 ALB ALDH1A1 ALDH9A1 ATXN1 BCL10 CACNA1B CADM1 CAT CDK7 CEL CLN6 CLN8 CNBP CRABP1 CRABP2 CRAT CTBP1 CTPS1 DHCR24 DHRS3 DIO1 DLG4 ECH1 ECI2 EHHADH ELOVL5 EPHX2 ERCC1 ERCC3 ESR2 FABP6 FADS1 FDPS FIS1 GNPAT GSTK1 HAO2 HMGCL HRAS HSD11B2 HSD17B11 HSD17B4 HSD3B7 IDE IDH1 IDH2 IDI1 ISOC1 ITGB1BP1 LONP2 MLYCD MSH2 MVP NR1…	104	6.70044	Fatty Acid Catabolic Process	GO:0009062	ABCD2;ACOT8;ABCD3;ECI2;HSD17B4;PEX2;PEX13;SLC25A17;SCP2;ACOX1;EHHADH;NUDT19;ACAA1;SLC27A2;HAO2	15	14.4231	1.11e-21	1.11e-18	Lipid Metabolism and Detoxification	The primary biological process performed by this system of interacting proteins is lipid metabolism and detoxification. The proteins involved in this process are responsible for the synthesis, transport, and breakdown of lipids, as well as the detoxification of harmful substances. 1. Lipid metabolism: Several proteins in this system are involved in lipid metabolism, including ACAA1, ACOT8, ACOX1,…	96	92.3077	The primary biological process performed by this system of interacting proteins is lipid metabolism and detoxification. The proteins involved in this process are responsible for the synthesis, transport, and breakdown of lipids, as well as the detoxification of harmful substances. 1. Lipid metabolism: Several proteins in this system are involved in lipid metabolism, including ACAA1, ACOT8, ACOX1,…	0.382308	0.298906	Neither	LLM
Diff. expressed gene set	PI3K AKT MTOR SIGNALING	NA	ACACA ACTR2 ACTR3 ADCY2 AKT1 AKT1S1 AP2M1 ARF1 ARHGDIA ARPC3 ATF1 CAB39 CAB39L CALR CAMK4 CDK1 CDK2 CDK4 CDKN1A CDKN1B CFL1 CLTC CSNK2B CXCR4 DAPP1 DDIT3 DUSP3 E2F1 ECSIT EGFR EIF4E FASLG FGF17 FGF22 FGF6 GNA14 GNGT1 GRB2 GRK2 GSK3B HRAS HSP90B1 IL2RG IL4 IRAK4 ITPR2 LCK MAP2K3 MAP2K6 MAP3K7 MAPK1 MAPK10 MAPK8 MAPK9 MAPKAP1 MKNK1 MKNK2 MYD88 NCK1 NFKBIB NGF NOD1 PAK4 PDK1 PFN1 PIK3R3 PIKFYVE PIN1…	105	6.71425	Protein Phosphorylation	GO:0006468	GSK3B;PRKAA2;CAB39;PRKAG1;EGFR;MAPK9;RPS6KA3;MAPK8;TBK1;GRK2;MKNK1;MKNK2;RPS6KA1;AKT1;MAPK1;RIPK1;MAP3K7;PAK4;PDK1;SMAD2;PRKCB;MAPK10;CDK4;LCK;CAMK4;CSNK2B;CDK2;CDK1	28	26.6667	2.7e-21	4.1e-18	PI3K-AKT-mTOR Signaling	The most prominent biological process performed by this system of interacting proteins is the PI3K-AKT-mTOR signaling pathway. This pathway is crucial for regulating cell growth, survival, and metabolism. 1. Activation of receptor tyrosine kinases (RTKs) such as EGFR and CXCR4 initiates the pathway. This leads to the recruitment of adaptor proteins like GRB2, which in turn activates PI3K (compose…	28	26.6667	The most prominent biological process performed by this system of interacting proteins is the PI3K-AKT-mTOR signaling pathway. This pathway is crucial for regulating cell growth, survival, and metabolism.[1][2][3] 1. Activation of receptor tyrosine kinases (RTKs) such as EGFR and CXCR4 initiates the pathway. This leads to the recruitment of adaptor proteins like GRB2, which in turn activates PI3K…	0.976865	0.337696	LLM	LLM
Diff. expressed gene set	PROTEIN SECRETION	NA	ABCA1 ADAM10 ANP32E AP1G1 AP2B1 AP2M1 AP2S1 AP3B1 AP3S1 ARCN1 ARF1 ARFGAP3 ARFGEF1 ARFGEF2 ARFIP1 ATP1A1 ATP6V1B1 ATP6V1H ATP7A BET1 BNIP3 CAV2 CD63 CLCN3 CLN5 CLTA CLTC COG2 COPB1 COPB2 COPE CTSC DNM1L DOP1A DST EGFR ERGIC3 GALC GBF1 GLA GNAS GOLGA4 GOSR2 ICA1 IGF2R KIF1B KRT18 LAMP2 LMAN1 M6PR MAPK1 MON2 NAPA NAPG OCRL PAM PPT1 RAB14 RAB22A RAB2A RAB5A RAB9A RER1 RPS6KA3 SCAMP1 SCAMP3 SCRN1 SEC…	96	6.58496	Golgi Vesicle Transport	GO:0048193	NAPA;COPB2;TMED10;COPB1;GOSR2;SNAP23;USO1;NAPG;LMAN1;GOLGA4;SNX2;TMED2;YKT6;SEC31A;RAB2A;GBF1;COG2;SCAMP1;SCAMP3;ARCN1;VAMP7;RER1;ZW10;SEC24D;ERGIC3;SEC22B;COPE;BET1	28	29.1667	6.66e-34	5.53e-31	Intracellular Vesicle Trafficking	The primary biological process performed by this system of interacting proteins is intracellular vesicle trafficking. This process is crucial for the proper functioning of cells, as it facilitates the transport of proteins, lipids, and other molecules between different cellular compartments. 1. Endocytic and exocytic pathways: Many proteins in this system, such as AP2B1, AP2M1, AP2S1, CLTA, CLTC,…	77	80.2083	The primary biological process performed by this system of interacting proteins is intracellular vesicle trafficking. This process is crucial for the proper functioning of cells, as it facilitates the transport of proteins, lipids, and other molecules between different cellular compartments. 1. Endocytic and exocytic pathways: Many proteins in this system, such as AP2B1, AP2M1, AP2S1, CLTA, CLTC,…	0.519096	0.479169	Tied	Neither
Diff. expressed gene set	REACTIVE OXYGEN SPECIES PATHWAY	NA	ABCC1 ATOX1 CAT CDKN2D EGLN2 ERCC2 FES FTL G6PD GCLC GCLM GLRX GLRX2 GPX3 GPX4 GSR HHEX HMOX2 IPCEF1 JUNB LAMTOR5 LSP1 MBP MGST1 MPO MSRA NDUFA6 NDUFB4 NDUFS2 NQO1 OXSR1 PDLIM1 PFKP PRDX1 PRDX2 PRDX4 PRDX6 PRNP PTPA SBNO2 SCAF4 SELENOS SOD1 SOD2 SRXN1 STK25 TXN TXNRD1 TXNRD2	49	5.61471	Hydrogen Peroxide Catabolic Process	GO:0042744	PRDX2;PRDX4;GPX3;PRDX1;CAT;MPO	6	12.2449	5.94e-12	3.52e-09	Redox Homeostasis and Cellular Respiration	The primary biological process performed by this system of interacting proteins is the maintenance of redox homeostasis and cellular respiration. The proteins involved in this process are responsible for regulating the balance of reactive oxygen species (ROS) and antioxidants, as well as facilitating energy production through oxidative phosphorylation. 1. Antioxidant defense and ROS regulation: S…	28	57.1429	The primary biological process performed by this system of interacting proteins is the maintenance of redox homeostasis and cellular respiration. The proteins involved in this process are responsible for regulating the balance of reactive oxygen species (ROS) and antioxidants, as well as facilitating energy production through oxidative phosphorylation. 1. Antioxidant defense and ROS regulation: S…	0.646677	0.566504	LLM	LLM
Diff. expressed gene set	SPERMATOGENESIS	NA	ACE ACRBP ACRV1 ACTL7B ADAD1 ADAM2 ADCYAP1 AGFG1 AKAP4 ALOX15 ARL4A ART3 AURKA BRAF BUB1 CAMK4 CCNA1 CCNB2 CCT6B CDK1 CDKN3 CFTR CHFR CHRM4 CLGN CLPB CLVS1 CNIH2 COIL CRISP2 CSNK2A2 CST8 DBF4 DCC DDX25 DDX4 DMC1 DMRT1 DNAJB8 DPEP3 ELOVL3 EZH2 GAD1 GAPDHS GFI1 GMCL1 GPR182 GRM8 GSG1 GSTM3 H1-6 HBZ HOXB1 HSPA1L HSPA2 HSPA4L HTR5A IDE IFT88 IL12RB2 IL13RA2 IP6K1 JAM3 KIF2C LDHC LPIN1 MAP7 MAST2 MEP1…	135	7.07682	Regulation Of Chromosome Segregation	GO:0051983	CSNK2A2;KIF2C;BUB1;NCAPH	4	2.96296	3.58e-05	0.0356373	Spermatogenesis Regulation	The interacting proteins in this system predominantly contribute to the regulation of spermatogenesis, a process by which male germ cells develop into mature spermatozoa. The proteins involved in this process are essential for male fertility and reproduction. 1. Germ cell development: Several proteins, such as DMC1, DMRT1, DDX4, and SYCP1, play crucial roles in germ cell development and meiosis. …	17	12.5926	The interacting proteins in this system predominantly contribute to the regulation of spermatogenesis, a process by which male germ cells develop into mature spermatozoa. The proteins involved in this process are essential for male fertility and reproduction. 1. Germ cell development: Several proteins, such as DMC1, DMRT1, DDX4, and SYCP1, play crucial roles in germ cell development and meiosis. …	0.805591	0.400221	LLM	LLM
Diff. expressed gene set	TGF BETA SIGNALING	NA	ACVR1 APC ARID4B BCAR3 BMP2 BMPR1A BMPR2 CDH1 CDK9 CDKN1C CTNNB1 ENG FKBP1A FNTA FURIN HDAC1 HIPK2 ID1 ID2 ID3 IFNGR2 JUNB KLF10 LEFTY2 LTBP2 MAP3K7 NCOR2 NOG PMEPA1 PPM1A PPP1CA PPP1R15A RAB31 RHOA SERPINE1 SKI SKIL SLC20A1 SMAD1 SMAD3 SMAD6 SMAD7 SMURF1 SMURF2 SPTBN1 TGFB1 TGFBR1 TGIF1 THBS1 TJP1 TRIM33 UBE2D3 WWTR1 XIAP	54	5.75489	Transmembrane Receptor Protein Serine/Threonine Kinase Signaling Pathway	GO:0007178	ACVR1;TGFB1;BMPR2;SMAD3;SMURF2;SMURF1;FURIN;LTBP2;SMAD6;TGFBR1;HIPK2;SMAD7;SKI;FKBP1A;BMP2;FNTA;ID1;MAP3K7;LEFTY2;BMPR1A;ENG	21	38.8889	9.43e-33	1.1e-29	TGF-Œ≤ Signaling Pathway	The primary biological process performed by this system of interacting proteins is the TGF-Œ≤ signaling pathway. This pathway is crucial for regulating cell growth, differentiation, and apoptosis. The proteins involved in this process include TGFB1, TGFBR1, SMAD1, SMAD3, SMAD6, SMAD7, and others. Reasoning and Supporting Information: 1. TGF-Œ≤ ligands and receptors: TGFB1 is a TGF-Œ≤ ligand that …	49	90.7407	The primary biological process performed by this system of interacting proteins is the TGF-Œ≤ signaling pathway. This pathway is crucial for regulating cell growth, differentiation, and apoptosis. The proteins involved in this process include TGFB1, TGFBR1, SMAD1, SMAD3, SMAD6, SMAD7, and others.[1][2][3] 1. TGF-Œ≤ ligands and receptors: TGFB1 is a TGF-Œ≤ ligand that binds to TGFBR1, a type I rec…	0.968511	0.616875	LLM	LLM
Diff. expressed gene set	TNFA SIGNALING VIA NFKB	NA	ABCA1 ACKR3 AREG ATF3 ATP2B1 B4GALT1 B4GALT5 BCL2A1 BCL3 BCL6 BHLHE40 BIRC2 BIRC3 BMP2 BTG1 BTG2 BTG3 CCL2 CCL20 CCL4 CCL5 CCN1 CCND1 CCNL1 CCRL2 CD44 CD69 CD80 CD83 CDKN1A CEBPB CEBPD CFLAR CLCF1 CSF1 CSF2 CXCL1 CXCL10 CXCL11 CXCL2 CXCL3 CXCL6 DENND5A DNAJB4 DRAM1 DUSP1 DUSP2 DUSP4 DUSP5 EDN1 EFNA1 EGR1 EGR2 EGR3 EHD1 EIF1 ETS2 F2RL1 F3 FJX1 FOS FOSB FOSL1 FOSL2 FUT4 G0S2 GADD45A GADD45B GCH1 GE…	200	7.64386	Positive Regulation Of Transcription By RNA Polymerase II	GO:0045944	LITAF;TNF;ETS2;MYC;ZC3H12A;NAMPT;IER5;JUNB;IER2;KLF10;KDM6B;EDN1;RIPK2;IL18;FOS;IRF1;SQSTM1;ATF3;TLR2;NFAT5;CEBPB;RELA;RELB;HES1;STAT5A;EGR1;EGR2;JUN;JAG1;SMAD3;LIF;INHBA;KLF4;NFKB1;KLF2;FOSL2;VEGFA;NFKB2;NR4A2;NFKBIA;PER1;CXCL10;NR4A1;BMP2;IL6;KLF6;NR4A3;TNIP1;TNIP2;MAFF;BCL3;REL;F2RL1;RIGI;NFE2L2	55	27.5	2.12e-27	4.49e-24	Inflammatory Response and Cell Cycle Regulation	The system of interacting proteins primarily involves the inflammatory response and cell cycle regulation. Key proteins involved in these processes include: 1. Inflammatory Response: - CCL2, CCL4, CCL5, CXCL1, CXCL2, CXCL3, CXCL6, CXCL10, and CXCL11 are chemokines that recruit immune cells to the site of inflammation. - IL1A, IL1B, IL6, IL12B, IL18, IL23A, and TNF are cytokines that mediate infla…	44	22	The system of interacting proteins primarily involves the inflammatory response and cell cycle regulation. Key proteins involved in these processes include: - CCL2, CCL4, CCL5, CXCL1, CXCL2, CXCL3, CXCL6, CXCL10, and CXCL11 are chemokines that recruit immune cells to the site of inflammation.[1][2][3] - IL1A, IL1B, IL6, IL12B, IL18, IL23A, and TNF are cytokines that mediate inflammatory response …	0.26874	0.211553	Neither	LLM
Diff. expressed gene set	UNFOLDED PROTEIN RESPONSE	NA	ALDH18A1 ARFGAP1 ASNS ATF3 ATF4 ATF6 ATP6V0D1 BAG3 BANF1 CALR CCL2 CEBPB CEBPG CHAC1 CKS1B CNOT2 CNOT4 CNOT6 CXXC1 DCP1A DCP2 DCTN1 DDIT4 DDX10 DKC1 DNAJA4 DNAJB9 DNAJC3 EDC4 EDEM1 EEF2 EIF2AK3 EIF2S1 EIF4A1 EIF4A2 EIF4A3 EIF4E EIF4EBP1 EIF4G1 ERN1 ERO1A EXOC2 EXOSC1 EXOSC10 EXOSC2 EXOSC4 EXOSC5 EXOSC9 FKBP14 FUS GEMIN4 GOSR2 H2AX HERPUD1 HSP90B1 HSPA5 HSPA9 HYOU1 IARS1 IFIT1 IGFBP1 IMP3 KDELR3 K…	113	6.82018	Response To Endoplasmic Reticulum Stress	GO:0034976	ERO1A;XBP1;CEBPB;HSPA5;WFS1;EIF2AK3;PDIA6;EIF2S1;HSP90B1;HERPUD1;ERN1;DNAJB9;HYOU1;CHAC1;ATF6;ATF3;ATF4	17	15.0442	8.25e-20	9.07e-17	Integrated Stress Response (ISR)	The system of interacting proteins primarily performs the Integrated Stress Response (ISR), a cellular process that helps cells adapt to various stress conditions. The ISR is initiated by the activation of eukaryotic initiation factor 2 alpha (eIF2Œ±) kinases, such as EIF2AK3, which phosphorylate EIF2S1, leading to a reduction in global protein synthesis and the selective translation of stress-re…	35	30.9735	The system of interacting proteins primarily performs the Integrated Stress Response (ISR), a cellular process that helps cells adapt to various stress conditions. The ISR is initiated by the activation of eukaryotic initiation factor 2 alpha (eIF2Œ±) kinases, such as EIF2AK3, which phosphorylate EIF2S1, leading to a reduction in global protein synthesis and the selective translation of stress-re…	0.614276	0.730867	GO	GO
Diff. expressed gene set	UV RESPONSE DN	NA	ABCC1 ACVR2A ADD3 ADGRL2 ADORA2B AGGF1 AKT3 AMPH ANXA2 ANXA4 APBB2 ARHGEF9 ATP2B1 ATP2B4 ATP2C1 ATRN ATRX ATXN1 BCKDHB BDNF BHLHE40 BMPR1A CACNA1A CAP2 CAV1 CCN1 CDC42BPA CDK13 CDKN1B CDON CELF2 CITED2 COL11A1 COL1A1 COL1A2 COL3A1 COL5A2 DAB2 DBP DDAH1 DLC1 DLG1 DMAC2L DUSP1 DYRK1A EFEMP1 ERBB2 F3 FBLN5 FHL2 FYN FZD2 GCNT1 GJA1 GRK5 HAS2 ICA1 ID1 IGF1R IGFBP5 INPP4B INSIG1 IRS1 ITGB3 KALRN KCNMA1…	144	7.16993	Transmembrane Receptor Protein Serine/Threonine Kinase Signaling Pathway	GO:0007178	TGFBR3;COL3A1;SMAD3;COL1A2;ZMIZ1;MAGI2;ID1;PPARG;ACVR2A;SMAD7;BMPR1A;TGFBR2	12	8.33333	1.7e-10	3.02e-07	Extracellular Matrix Remodeling	The most prominent biological process performed by this system of interacting proteins is extracellular matrix (ECM) remodeling. This process is crucial for various cellular functions, including cell adhesion, migration, and differentiation. Reasoning and Supporting Information: 1. ECM components: Several proteins in the list, such as COL1A1, COL1A2, COL3A1, COL5A2, and COL11A1, are collagen fami…	23	15.9722	The most prominent biological process performed by this system of interacting proteins is extracellular matrix (ECM) remodeling. This process is crucial for various cellular functions, including cell adhesion, migration, and differentiation. 1. ECM components: Several proteins in the list, such as COL1A1, COL1A2, COL3A1, COL5A2, and COL11A1, are collagen family members, which are major structural…	0.366091	0.304752	Neither	Neither
Diff. expressed gene set	UV RESPONSE UP	NA	ABCB1 ACAA1 AGO2 ALAS1 ALDOA AMD1 AP2S1 APOM AQP3 ARRB2 ASNS ATF3 ATP6V1C1 ATP6V1F BAK1 BCL2L11 BID BMP2 BSG BTG1 BTG2 BTG3 C4BPB CA2 CASP3 CCK CCND3 CCNE1 CDC34 CDC5L CDK2 CDKN1C CDKN2B CDO1 CEBPG CHKA CHRNA5 CLCN2 CLTB CNP COL2A1 CREG1 CTSV CXCL2 CYB5B CYB5R1 CYP1A1 DDX21 DGAT1 DLG4 DNAJA1 DNAJB1 E2F5 EIF2S3 EIF5 ENO2 EPCAM EPHX1 FEN1 FGF18 FKBP4 FMO1 FOS FOSB FURIN GAL GCH1 GGH GLS GPX3 GRINA …	158	7.30378	Response To Hydrogen Peroxide	GO:0042542	IL6;STK25;PRKCD;PPIF;HMOX1;RHOB	6	3.79747	1.59e-06	0.00136219	Cell Cycle Regulation and Apoptosis	The most prominent biological process performed by this system of interacting proteins is cell cycle regulation and apoptosis. This is supported by the presence of several key proteins involved in these processes. 1. Cell cycle regulation: Several proteins in the list are involved in cell cycle regulation, including CCND3, CCNE1, CDK2, CDKN1C, and CDKN2B. These proteins play crucial roles in cont…	23	14.557	The most prominent biological process performed by this system of interacting proteins is cell cycle regulation and apoptosis. This is supported by the presence of several key proteins involved in these processes. 1. Cell cycle regulation: Several proteins in the list are involved in cell cycle regulation, including CCND3, CCNE1, CDK2, CDKN1C, and CDKN2B. These proteins play crucial roles in cont…	0.353191	0.476652	GO	Neither
Diff. expressed gene set	WNT BETA CATENIN SIGNALING	NA	ADAM17 AXIN1 AXIN2 CCND2 CSNK1E CTNNB1 CUL1 DKK1 DKK4 DLL1 DVL2 FRAT1 FZD1 FZD8 GNAI1 HDAC11 HDAC2 HDAC5 HEY1 HEY2 JAG1 JAG2 KAT2A LEF1 MAML1 MYC NCOR2 NCSTN NKD1 NOTCH1 NOTCH4 NUMB PPARD PSEN2 PTCH1 RBPJ SKP2 TCF7 TP53 WNT1 WNT5B WNT6	42	5.39232	Notch Signaling Pathway	GO:0007219	JAG2;ADAM17;NOTCH1;JAG1;HEY1;MAML1;NOTCH4;HEY2;RBPJ;DLL1	10	23.8095	4.24e-19	2.95e-16	Wnt/Notch Signaling Pathway Regulation	The primary biological process performed by this system of interacting proteins is the regulation of the Wnt and Notch signaling pathways. These pathways play crucial roles in cell proliferation, differentiation, and development. 1. Wnt signaling pathway: The proteins FZD1, FZD8, WNT1, WNT5B, and WNT6 are involved in the activation of the Wnt signaling pathway. DVL2, AXIN1, AXIN2, and CTNNB1 are …	39	92.8571	The primary biological process performed by this system of interacting proteins is the regulation of the Wnt and Notch signaling pathways. These pathways play crucial roles in cell proliferation, differentiation, and development. 1. Wnt signaling pathway: The proteins FZD1, FZD8, WNT1, WNT5B, and WNT6 are involved in the activation of the Wnt signaling pathway. DVL2, AXIN1, AXIN2, and CTNNB1 are …	0.630664	0.603154	Tied	LLM
Diff. expressed gene set	peroxisome	NA	PEX1 PEX2 PEX3 PEX4 PEX5 PEX6 PEX7 PEX8	8	3	Protein Targeting To Peroxisome	GO:0006625	PEX7;PEX3;PEX6;PEX5;PEX2;PEX1	6	75	2.52e-18	1.4e-16	Peroxisome Biogenesis	The primary biological process performed by the interacting proteins PEX1, PEX2, PEX3, PEX4, PEX5, PEX6, PEX7, and PEX8 is peroxisome biogenesis. These proteins are collectively known as peroxins and are essential for the formation, maintenance, and function of peroxisomes. 1. PEX1 and PEX6: These AAA-ATPases form a heterohexameric complex that is crucial for the recycling of PEX5, a peroxisomal …	8	100	The primary biological process performed by the interacting proteins PEX1, PEX2, PEX3, PEX4, PEX5, PEX6, PEX7, and PEX8 is peroxisome biogenesis. These proteins are collectively known as peroxins and are essential for the formation, maintenance, and function of peroxisomes.[1][2][3] 1. PEX1 and PEX6: These AAA-ATPases form a heterohexameric complex that is crucial for the recycling of PEX5, a per…	0.821307	0.685895	LLM	LLM
NeST	EMT	NEST:108	APC CBL CDH1 CDH2 CTNNA1 CTNNB1 EGF EGFR ERBB2 FYN HDAC1 HDAC2 SOX2 TCF7L2	14	3.80735	ERBB2-EGFR Signaling Pathway	GO:0038134	EGF;ERBB2;EGFR	3	21.4286	2.73e-09	7.75e-07	Wnt Signaling and Cell Adhesion Regulation	1. Wnt signaling pathway involvement: - CTNNB1 (beta-catenin) is a key component of the Wnt signaling pathway. - TCF7L2 (TCF4) is a transcription factor that interacts with CTNNB1 to regulate gene expression. - APC is a negative regulator of Wnt signaling, promoting CTNNB1 degradation. - These interactions suggest the system is involved in the regulation of Wnt signaling, which plays a role in ce…	14	100	- CTNNB1 (beta-catenin) is a key component of the Wnt signaling pathway.[1][2][3] - TCF7L2 (TCF4) is a transcription factor that interacts with CTNNB1 to regulate gene expression.[4][5][6] - APC is a negative regulator of Wnt signaling, promoting CTNNB1 degradation.[7][8][9] - These interactions suggest the system is involved in the regulation of Wnt signaling, which plays a role in cell prolifer…	0.361388	0.372192	Neither	LLM
NeST	Regulation of E2F transcription via DREAM complex	NEST:119	E2F1 E2F2 E2F3 E2F4 E2F5 MDM2 RB1 RBL1 RBL2 TFDP1 TP53	11	3.45943	Regulation Of Transcription Involved In G1/S Transition Of Mitotic Cell Cycle	GO:0000083	RB1;TFDP1;E2F1;E2F2	4	36.3636	1.91e-10	5.16e-08	Cell Cycle Regulation	The primary biological process performed by this system of interacting proteins is the regulation of the cell cycle, specifically the G1/S phase transition. The key proteins involved in this process are E2F transcription factors (E2F1-5), retinoblastoma proteins (RB1, RBL1, RBL2), and tumor protein p53 (TP53). E2F transcription factors (E2F1-5) are essential for the regulation of cell cycle progr…	8	72.7273	The primary biological process performed by this system of interacting proteins is the regulation of the cell cycle, specifically the G1/S phase transition. The key proteins involved in this process are E2F transcription factors (E2F1-5), retinoblastoma proteins (RB1, RBL1, RBL2), and tumor protein p53 (TP53).[1][2][3] E2F transcription factors (E2F1-5) are essential for the regulation of cell cy…	0.409294	0.429377	Tied	GO
NeST	PML body	NEST:123	CREBBP DAXX EP300 HDAC1 NPM1 PARP1 PML RB1 TERT	9	3.16993	Cellular Response To Light Stimulus	GO:0071482	CREBBP;NPM1;PARP1;EP300	4	44.4444	1.26e-08	4.16e-06	Chromatin Remodeling and Transcription Regulation	The system of interacting proteins CREBBP, DAXX, EP300, HDAC1, NPM1, PARP1, PML, RB1, and TERT primarily perform chromatin remodeling and transcription regulation. 1. CREBBP and EP300: Both CREBBP (CREB-binding protein) and EP300 (E1A binding protein p300) are histone acetyltransferases (HATs) that play a crucial role in transcription regulation. They acetylate histones, leading to a more relaxed…	9	100	The system of interacting proteins CREBBP, DAXX, EP300, HDAC1, NPM1, PARP1, PML, RB1, and TERT primarily perform chromatin remodeling and transcription regulation. [1][2][3] 1. CREBBP and EP300: Both CREBBP (CREB-binding protein) and EP300 (E1A binding protein p300) are histone acetyltransferases (HATs) that play a crucial role in transcription regulation. They acetylate histones, leading to a mo…	0.247342	0.274291	Neither	LLM
NeST	Extended mismatch repair complex	NEST:125	ERCC1 ERCC4 MLH1 MLH3 MSH2 MSH3 MSH6 PMS1 PMS2 SLX4	10	3.32193	Mismatch Repair	GO:0006298	MSH6;MSH2;MSH3;PMS2;MLH1;MLH3;PMS1	7	70	2.27e-19	1.57e-17	DNA Repair and Mismatch Repair	The system of interacting proteins ERCC1, ERCC4, MLH1, MLH3, MSH2, MSH3, MSH6, PMS1, PMS2, and SLX4 primarily perform DNA repair and mismatch repair processes. 1. ERCC1 and ERCC4: These proteins form a heterodimeric endonuclease complex involved in nucleotide excision repair (NER). NER is a critical process that removes bulky DNA lesions caused by UV radiation and chemical mutagens. ERCC1 is resp…	10	100	The system of interacting proteins ERCC1, ERCC4, MLH1, MLH3, MSH2, MSH3, MSH6, PMS1, PMS2, and SLX4 primarily perform DNA repair and mismatch repair processes. [1][2][3] 1. ERCC1 and ERCC4: These proteins form a heterodimeric endonuclease complex involved in nucleotide excision repair (NER). NER is a critical process that removes bulky DNA lesions caused by UV radiation and chemical mutagens. ERC…	0.761386	0.763775	Tied	Tied
NeST	Regulation of beta catenin transcriptional activity	NEST:126	CHEK2 CREBBP CTNNB1 EP300 HDAC2 HDAC3 KAT6A KMT2A TCF3 TP53	10	3.32193	Positive Regulation Of Nucleic Acid-Templated Transcription	GO:1903508	CREBBP;HDAC2;KMT2A;CHEK2;KAT6A;CTNNB1;EP300;TCF3;TP53	9	90	9.22e-14	3.53e-11	Regulation of Gene Expression and DNA Damage Response	Proteins: CHEK2, CREBBP, CTNNB1, EP300, HDAC2, HDAC3, KAT6A, KMT2A, TCF3, TP53. 1. DNA Damage Response and Cell Cycle Regulation: - CHEK2 and TP53 are key players in DNA damage response and cell cycle regulation. - CHEK2 is a serine/threonine kinase that phosphorylates TP53, enhancing its stability and transcriptional activity. - TP53 is a tumor suppressor that regulates cell cycle progression an…	10	100	Proteins: CHEK2, CREBBP, CTNNB1, EP300, HDAC2, HDAC3, KAT6A, KMT2A, TCF3, TP53. 1. DNA Damage Response and Cell Cycle Regulation: - CHEK2 and TP53 are key players in DNA damage response and cell cycle regulation.[1][2][3] - CHEK2 is a serine/threonine kinase that phosphorylates TP53, enhancing its stability and transcriptional activity.[4][5][6] - TP53 is a tumor suppressor that regulates cell cy…	0.358258	0.285545	Neither	Neither
NeST	Histone methyltransferase subcomplex	NEST:133	EP300 KDM6A KMT2A KMT2B KMT2D MEN1	6	2.58496	Histone H3-K4 Methylation	GO:0051568	KMT2D;KMT2A;KMT2B;KDM6A;MEN1	5	83.3333	1.48e-14	2.53e-12	Histone Modification and Chromatin Remodeling	Proteins: EP300, KDM6A, KMT2A, KMT2B, KMT2D, MEN1 1. Histone acetylation: EP300 is a histone acetyltransferase (HAT) that catalyzes the transfer of acetyl groups to lysine residues on histone tails, leading to chromatin relaxation and transcriptional activation. This process is crucial for the regulation of gene expression. 2. Histone demethylation: KDM6A is a histone demethylase that specificall…	6	100	Proteins: EP300, KDM6A, KMT2A, KMT2B, KMT2D, MEN1 1. Histone acetylation: EP300 is a histone acetyltransferase (HAT) that catalyzes the transfer of acetyl groups to lysine residues on histone tails, leading to chromatin relaxation and transcriptional activation. This process is crucial for the regulation of gene expression.[1][2][3] 2. Histone demethylation: KDM6A is a histone demethylase that sp…	0.541879	0.518865	Tied	GO
NeST	RPA complex associated proteins	NEST:134	ATM ATR BLM BRCA1 XPA XPC	6	2.58496	DNA Metabolic Process	GO:0006259	BLM;XPA;ATM;XPC;BRCA1;ATR	6	100	8.46e-12	8.65e-10	DNA Damage Response and Repair	Proteins: ATM, ATR, BLM, BRCA1, XPA, XPC 1. ATM and ATR: Key sensors and transducers of DNA damage - ATM and ATR are phosphatidylinositol 3-kinase-related kinases (PIKKs) that sense DNA damage and initiate the DNA damage response (DDR) by phosphorylating downstream targets. - ATM primarily responds to DNA double-strand breaks (DSBs), while ATR is activated by single-stranded DNA (ssDNA) and stall…	6	100	Proteins: ATM, ATR, BLM, BRCA1, XPA, XPC 1. ATM and ATR: Key sensors and transducers of DNA damage[1][2][3] - ATM and ATR are phosphatidylinositol 3-kinase-related kinases (PIKKs) that sense DNA damage and initiate the DNA damage response (DDR) by phosphorylating downstream targets.[4][5][6] - ATM primarily responds to DNA double-strand breaks (DSBs), while ATR is activated by single-stranded DNA…	0.410366	0.225056	LLM	LLM
NeST	PIK3/AKT signaling	NEST:138	AKT1 AKT2 AKT3 FOXO3 HSP90AA1 PDPK1 PIK3CB PIK3CD PRKCZ PRKDC PTEN	11	3.45943	Protein Modification Process	GO:0036211	PDPK1;PRKDC;AKT2;AKT3;PTEN;AKT1;PIK3CD;PRKCZ	8	72.7273	3.68e-10	1.05e-07	PI3K-AKT Signaling	The primary biological process performed by this system of interacting proteins is the phosphatidylinositol 3-kinase (PI3K)-AKT signaling pathway. This pathway plays a crucial role in regulating cell survival, growth, proliferation, and metabolism. 1. AKT isoforms and activation: AKT1, AKT2, and AKT3 are three isoforms of AKT, a serine/threonine kinase. Their activation is initiated by PI3K, whic…	11	100	The primary biological process performed by this system of interacting proteins is the phosphatidylinositol 3-kinase (PI3K)-AKT signaling pathway. This pathway plays a crucial role in regulating cell survival, growth, proliferation, and metabolism.[1][2][3] 1. AKT isoforms and activation: AKT1, AKT2, and AKT3 are three isoforms of AKT, a serine/threonine kinase. Their activation is initiated by P…	0.965651	0.201562	LLM	LLM
NeST	EGFR/PI3K signaling	NEST:153	ABL1 CBL CRKL CTNNB1 EGF EGFR ERBB2 MET PIK3R1 PIK3R2 SOCS1	11	3.45943	ERBB2-EGFR Signaling Pathway	GO:0038134	EGF;ERBB2;EGFR	3	27.2727	1.24e-09	4.97e-07	Receptor Tyrosine Kinase Signaling	The most prominent biological process performed by this system of interacting proteins is receptor tyrosine kinase (RTK) signaling. This process is crucial for cellular communication, growth, and differentiation. 1. Key RTKs: EGFR, ERBB2, and MET are receptor tyrosine kinases that play essential roles in cell signaling. EGFR and ERBB2 are members of the ErbB family, while MET is a receptor for he…	11	100	The most prominent biological process performed by this system of interacting proteins is receptor tyrosine kinase (RTK) signaling. This process is crucial for cellular communication, growth, and differentiation. 1. Key RTKs: EGFR, ERBB2, and MET are receptor tyrosine kinases that play essential roles in cell signaling. EGFR and ERBB2 are members of the ErbB family, while MET is a receptor for he…	0.60784	0.798631	GO	GO
NeST	Phosphatase 2A catalytic subunit	NEST:170	PPP2CA PPP2CB PPP2R1A PPP2R1B PPP2R2A	5	2.32193	Protein Dephosphorylation	GO:0006470	PPP2CA;PPP2CB;PPP2R1B;PPP2R1A;PPP2R2A	5	100	8.44e-12	5.66e-10	Protein Phosphatase 2A (PP2A) Regulation	Proteins: PPP2CA, PPP2CB, PPP2R1A, PPP2R1B, PPP2R2A 1. Heterotrimeric complex formation: - PPP2CA and PPP2CB are catalytic subunits of PP2A, a serine/threonine phosphatase. - PPP2R1A and PPP2R1B are regulatory subunits, providing substrate specificity and localization. - PPP2R2A is a regulatory B subunit, further modulating substrate specificity. - The heterotrimeric complex consists of one catal…	5	100	Proteins: PPP2CA, PPP2CB, PPP2R1A, PPP2R1B, PPP2R2A - PPP2CA and PPP2CB are catalytic subunits of PP2A, a serine/threonine phosphatase.[1][2][3] - PPP2R1A and PPP2R1B are regulatory subunits, providing substrate specificity and localization.[4][5][6] - PPP2R2A is a regulatory B subunit, further modulating substrate specificity.[7][8][9] - The heterotrimeric complex consists of one catalytic (PPP2…	0.761392	0.523205	LLM	LLM
NeST	RNA metabolism	NEST:19	BCLAF1 BRD4 CASP8 CDC73 CREBBP DDX3X EWSR1 FUBP1 FUS GATA3 PRCC PRKDC PRPF40B RBM10 SF1 SF3B1 SPEN SRSF2 TNF U2AF1 UPF1 ZRSR2	22	4.45943	RNA Splicing, Via Transesterification Reactions With Bulged Adenosine As Nucleophile	GO:0000377	ZRSR2;SRSF2;PRPF40B;U2AF1;SF3B1;RBM10	6	27.2727	3.24e-08	1.38e-05	Apoptosis and Splicing Regulation	Proteins: BCLAF1, BRD4, CASP8, CDC73, CREBBP, DDX3X, EWSR1, FUBP1, FUS, GATA3, PRCC, PRKDC, PRPF40B, RBM10, SF1, SF3B1, SPEN, SRSF2, TNF, U2AF1, UPF1, ZRSR2. Analysis: 1. Apoptosis regulation: CASP8 and TNF are key proteins involved in apoptosis. CASP8 is a caspase protein that initiates the extrinsic apoptotic pathway, while TNF is a cytokine that can induce apoptosis through TNF receptor signal…	22	100	Proteins: BCLAF1, BRD4, CASP8, CDC73, CREBBP, DDX3X, EWSR1, FUBP1, FUS, GATA3, PRCC, PRKDC, PRPF40B, RBM10, SF1, SF3B1, SPEN, SRSF2, TNF, U2AF1, UPF1, ZRSR2. 1. Apoptosis regulation: CASP8 and TNF are key proteins involved in apoptosis. CASP8 is a caspase protein that initiates the extrinsic apoptotic pathway, while TNF is a cytokine that can induce apoptosis through TNF receptor signaling. BCLAF…	0.453426	0.44643	Tied	GO
NeST	MutS homologs	NEST:231	MLH1 MSH2 MSH3 MSH6 PMS2	5	2.32193	Mismatch Repair	GO:0006298	MSH6;MSH2;MSH3;PMS2;MLH1	5	100	1.99e-15	8.57e-14	Mismatch Repair	The system of interacting proteins MLH1, MSH2, MSH3, MSH6, and PMS2 primarily performs the biological process of mismatch repair (MMR). MMR is crucial for maintaining genomic stability by correcting base mismatches and insertion/deletion loops that arise during DNA replication. 1. MSH2-MSH6 and MSH2-MSH3 heterodimers: MSH2 forms heterodimers with MSH6 (MutSŒ±) and MSH3 (MutSŒ≤). MutSŒ± recognizes…	5	100	The system of interacting proteins MLH1, MSH2, MSH3, MSH6, and PMS2 primarily performs the biological process of mismatch repair (MMR). MMR is crucial for maintaining genomic stability by correcting base mismatches and insertion/deletion loops that arise during DNA replication.[1][2][3] 1. MSH2-MSH6 and MSH2-MSH3 heterodimers: MSH2 forms heterodimers with MSH6 (MutSŒ±) and MSH3 (MutSŒ≤). MutSŒ± r…	0.682028	0.682028	Tied	Tied
NeST	Beta-catenin destruction complex	NEST:239	APC AXIN1 CTNNB1 GSK3B HLA-A	5	2.32193	Proteasomal Protein Catabolic Process	GO:0010498	GSK3B;APC;AXIN1;CTNNB1	4	80	7.06e-08	2.27e-05	Wnt Signaling Pathway Regulation	Proteins: APC, AXIN1, CTNNB1, GSK3B, HLA-A 1. APC and AXIN1: Both APC (adenomatous polyposis coli) and AXIN1 (axis inhibition protein 1) are key components of the destruction complex, which plays a crucial role in regulating the Wnt signaling pathway. The destruction complex targets CTNNB1 (beta-catenin) for degradation, preventing its accumulation in the cytoplasm and subsequent translocation to…	5	100	Proteins: APC, AXIN1, CTNNB1, GSK3B, HLA-A 1. APC and AXIN1: Both APC (adenomatous polyposis coli) and AXIN1 (axis inhibition protein 1) are key components of the destruction complex, which plays a crucial role in regulating the Wnt signaling pathway. The destruction complex targets CTNNB1 (beta-catenin) for degradation, preventing its accumulation in the cytoplasm and subsequent translocation to…	0.400953	0.368954	Tied	LLM
NeST	MAPK signaling	NEST:256	ERBB2 ERBB4 FGFR2 FGFR4 HRAS KRAS	6	2.58496	Positive Regulation Of Phosphorylation	GO:0042327	ERBB4;ERBB2;KRAS;FGFR4;HRAS;FGFR2	6	100	2.22e-12	5.07e-10	Receptor Tyrosine Kinase Signaling	The most prominent biological process performed by this system of interacting proteins is receptor tyrosine kinase (RTK) signaling. This process is critical for cellular communication, growth, and differentiation. 1. ERBB2 and ERBB4: Both proteins belong to the epidermal growth factor receptor (EGFR) family, which are receptor tyrosine kinases. They play a crucial role in cell proliferation and d…	6	100	The most prominent biological process performed by this system of interacting proteins is receptor tyrosine kinase (RTK) signaling. This process is critical for cellular communication, growth, and differentiation. 1. ERBB2 and ERBB4: Both proteins belong to the epidermal growth factor receptor (EGFR) family, which are receptor tyrosine kinases. They play a crucial role in cell proliferation and d…	0.625784	0.399123	LLM	LLM
NeST	MutL alpha/beta complex	NEST:277	BRCA1 BRIP1 MLH1 PMS1 PMS2	5	2.32193	Mismatch Repair	GO:0006298	PMS2;MLH1;PMS1	3	60	1.72e-08	1.6e-06	DNA Repair and Maintenance	The system of interacting proteins, consisting of BRCA1, BRIP1, MLH1, PMS1, and PMS2, primarily performs the biological process of DNA repair and maintenance. This process is crucial for maintaining genomic stability and preventing the accumulation of mutations that could lead to diseases such as cancer. 1. BRCA1: BRCA1 is a tumor suppressor protein that plays a critical role in maintaining genom…	5	100	The system of interacting proteins, consisting of BRCA1, BRIP1, MLH1, PMS1, and PMS2, primarily performs the biological process of DNA repair and maintenance. This process is crucial for maintaining genomic stability and preventing the accumulation of mutations that could lead to diseases such as cancer.[1][2][3] 1. BRCA1: BRCA1 is a tumor suppressor protein that plays a critical role in maintain…	0.455446	0.624696	GO	GO
NeST	ECM-cytoskeleton assembly	NEST:51	ACTA2 FANCC FGF10 PALLD PDGFRB TNF	6	2.58496	Positive Regulation Of ERK1 And ERK2 Cascade	GO:0070374	PDGFRB;TNF;FGF10	3	50	1.38e-05	0.00455016	Actin Cytoskeleton Regulation and Cellular Signaling	Analysis: 1. ACTA2: ACTA2 encodes for alpha-actin 2, a major component of the actin cytoskeleton. It plays a crucial role in cell motility, structure, and integrity. The presence of ACTA2 in this system suggests a role in maintaining cellular architecture and facilitating movement. 2. FANCC: FANCC is a component of the Fanconi anemia (FA) core complex, which is involved in DNA repair and the resp…	6	100	1. ACTA2: ACTA2 encodes for alpha-actin 2, a major component of the actin cytoskeleton. It plays a crucial role in cell motility, structure, and integrity. The presence of ACTA2 in this system suggests a role in maintaining cellular architecture and facilitating movement.[1][2][3] 2. FANCC: FANCC is a component of the Fanconi anemia (FA) core complex, which is involved in DNA repair and the respo…	0.648755	0.229923	LLM	LLM
NeST	Cyclin D associated events in G1	NEST:58	CCND1 CCND2 CCND3 CCNE1 CCNE2 CDK4 CDK5 CDK6 CDKN1A CDKN1B CDKN1C CDKN2A CDKN2B CDKN2C CKS1B E2F1 E2F2 E2F3 E2F4 E2F5 HLA-A MDM2 RB1 RBL1 RBL2 TFDP1 TP53	27	4.75489	G1/S Transition Of Mitotic Cell Cycle	GO:0000082	CDKN1A;CDKN1B;CCND3;TFDP1;CDK6;CCND2;CCNE2;CDK5;CCND1;CCNE1;CDK4;E2F1;E2F2;E2F3	14	51.8519	3.88e-29	1.75e-26	Cell Cycle Regulation	The primary biological process performed by this system of interacting proteins is the regulation of the cell cycle. The cell cycle is a series of events that lead to cell growth, DNA replication, and cell division. The proteins involved in this system play crucial roles in controlling the progression of the cell cycle and ensuring the fidelity of DNA replication. 1. Cyclins and cyclin-dependent …	27	100	The primary biological process performed by this system of interacting proteins is the regulation of the cell cycle. The cell cycle is a series of events that lead to cell growth, DNA replication, and cell division. The proteins involved in this system play crucial roles in controlling the progression of the cell cycle and ensuring the fidelity of DNA replication. 1. Cyclins and cyclin-dependent …	0.556787	0.628036	GO	GO
NeST	Chromosome centrometric region	NEST:59	AURKA AURKB BUB1B CHEK1 MKI67 RAD51 TOP2A	7	2.80735	Regulation Of Cell Cycle Process	GO:0010564	CHEK1;MKI67;AURKB;AURKA	4	57.1429	5.87e-08	9.75e-06	Mitotic Regulation and DNA Repair	Proteins: AURKA, AURKB, BUB1B, CHEK1, MKI67, RAD51, TOP2A. 1. AURKA and AURKB: Both proteins belong to the Aurora kinase family, which plays a crucial role in mitotic regulation. AURKA is involved in centrosome maturation and spindle assembly, while AURKB is essential for chromosome alignment and cytokinesis. Their interaction ensures proper cell division and prevents chromosomal instability. 2. …	7	100	Proteins: AURKA, AURKB, BUB1B, CHEK1, MKI67, RAD51, TOP2A. 1. AURKA and AURKB: Both proteins belong to the Aurora kinase family, which plays a crucial role in mitotic regulation. AURKA is involved in centrosome maturation and spindle assembly, while AURKB is essential for chromosome alignment and cytokinesis. Their interaction ensures proper cell division and prevents chromosomal instability.[1][…	0.494497	0.256014	LLM	LLM
NeST	Culin-RIng uniqutin ligase complex	NEST:61	CUL3 DDB2 ELOC MDM2 NF2 STK11 TET2 VHL	8	3	Protein Ubiquitination	GO:0016567	CUL3;MDM2;VHL;ELOC;DDB2	5	62.5	2.5e-07	5.61e-05	Ubiquitin-Proteasome Pathway	The system of interacting proteins CUL3, DDB2, ELOC, MDM2, NF2, STK11, TET2, and VHL primarily participates in the ubiquitin-proteasome pathway, which is responsible for the degradation of proteins in the cell. 1. CUL3: Cullin-3 is a scaffold protein that forms the core of E3 ubiquitin ligase complexes. It plays a crucial role in the ubiquitination of target proteins, marking them for degradation…	8	100	The system of interacting proteins CUL3, DDB2, ELOC, MDM2, NF2, STK11, TET2, and VHL primarily participates in the ubiquitin-proteasome pathway, which is responsible for the degradation of proteins in the cell.[1][2][3] 1. CUL3: Cullin-3 is a scaffold protein that forms the core of E3 ubiquitin ligase complexes. It plays a crucial role in the ubiquitination of target proteins, marking them for de…	0.424029	0.377877	Tied	Tied
NeST	Actin and actin-associated proteins	NEST:63	CBL MYH11 PIK3CA PPP1CB TPM1	5	2.32193	Cardiac Muscle Contraction	GO:0060048	PIK3CA;TPM1	2	40	2.63e-05	0.00204755	Actin-Myosin Regulation and Signaling	1. Actin-Myosin Interaction: MYH11 and TPM1 are both involved in the regulation of actin-myosin interactions. MYH11 is a smooth muscle myosin heavy chain, which is a major component of the contractile apparatus in smooth muscle cells. TPM1 is a tropomyosin protein that binds to actin filaments and regulates actin-myosin interactions in muscle contraction. The interaction between these two protein…	5	100	1. Actin-Myosin Interaction: MYH11 and TPM1 are both involved in the regulation of actin-myosin interactions. MYH11 is a smooth muscle myosin heavy chain, which is a major component of the contractile apparatus in smooth muscle cells. TPM1 is a tropomyosin protein that binds to actin filaments and regulates actin-myosin interactions in muscle contraction. The interaction between these two protein…	0.52467	0.293239	LLM	LLM
NeST	Protein nuclear transport	NEST:69	DAXX NUP93 NUP98 RANBP2 TERT XPO1	6	2.58496	Nuclear Transport	GO:0051169	NUP93;RANBP2;XPO1;NUP98	4	66.6667	1.85e-10	2.49e-08	Telomere Maintenance and Nuclear Transport	Proteins: DAXX, NUP93, NUP98, RANBP2, TERT, XPO1. 1. Telomere maintenance: TERT is the catalytic subunit of telomerase, an enzyme responsible for maintaining telomere length, which is crucial for genomic stability and cellular lifespan. DAXX is a chaperone protein that interacts with TERT, regulating its nuclear localization and activity. 2. Nuclear pore complex assembly: NUP93 and NUP98 are nucl…	6	100	Proteins: DAXX, NUP93, NUP98, RANBP2, TERT, XPO1. 1. Telomere maintenance: TERT is the catalytic subunit of telomerase, an enzyme responsible for maintaining telomere length, which is crucial for genomic stability and cellular lifespan. DAXX is a chaperone protein that interacts with TERT, regulating its nuclear localization and activity.[1][2][3] 2. Nuclear pore complex assembly: NUP93 and NUP98…	0.583233	0.923329	GO	GO
NeST	EGFR-MAPK signaling	NEST:73	ABL1 AKT1 ARAF BRAF CBL CDC25A CDKN1B EGFR HDAC4 HDAC5 HRAS KRAS MAP2K1 MAP2K2 MAPK1 MDM4 MYC RAF1 STAT3 STAT5A TNF TSC1 TSC2	23	4.52356	Regulation Of Cell Population Proliferation	GO:0042127	HDAC4;STAT5A;MAP2K1;CDKN1B;STAT3;TSC2;TSC1;EGFR;MYC;AKT1;MDM4;KRAS;RAF1;HRAS	14	60.8696	7.71e-15	5.99e-12	MAPK/ERK Signaling Pathway	The most prominent biological process performed by this system of interacting proteins is the Mitogen-Activated Protein Kinase/Extracellular signal-Regulated Kinase (MAPK/ERK) signaling pathway. This pathway is crucial for regulating cell proliferation, differentiation, and survival. 1. Growth factor receptor activation: EGFR, a receptor tyrosine kinase, is activated upon binding to its ligand, l…	21	91.3043	NA	0.760255	0.214634	LLM	LLM
NeST	Mediator complex	NEST:90	CDK8 ESR1 FBXW7 MED1 MED12 RARA	6	2.58496	Cellular Response To Hormone Stimulus	GO:0032870	MED1;RARA;ESR1	3	50	1.99e-06	0.000302	Transcriptional Regulation	The primary biological process performed by this system of interacting proteins is transcriptional regulation. This process involves the control of gene expression through the modulation of transcription initiation and elongation. 1. CDK8: Cyclin-dependent kinase 8 (CDK8) is a component of the Mediator complex, which is essential for the regulation of RNA polymerase II-dependent transcription. CD…	6	100	NA	0.327568	0.257012	Neither	LLM
