# Supplementary material for: Evaluation of large language models for discovery of gene set function
Source: Research Square preprint supplement (doi:10.21203/rs.3.rs-3270331/v1), 2023-09-18
Supplement: Supplementary file 4 [file 6b2f405915232d9622467fff.xlsx]

## Sheet: Supplementary Table 1. Complete
GO	Genes	Gene_Count	Term_Description	LLM Name	LLM Analysis	perc_gene_mentioned	num_gene_mentioned	LLM_name_GO_term_sim	sim_rank	true_GO_term_sim_percentile	random_GO_name	random_go_llm_sim	random_sim_rank	random_sim_percentile	top_50_hits	top_50_sim	pvals	adj_pvals	random_pvals	random_adj_pvals
GO:0030705	FLOT2 KLC3 DTNBP1 BBS12 UXT DYNC1H1 RAB6A AP3D1 BLOC1S4 CLIP3 MYO1G ARHGAP21 KIF1A SOD1 DYNLL1 F8A3 HOOK2 WASL SPAST CCDC88A APBA1 MAK MAP1A SSNA1 CNIH2 STAU1 COPG2 TERF2 MYO19 MYO6 MAP2 IFT46 TUBA1C UCHL1 FEZ1 MYO1F SYNE2 RAB21 BLOC1S6 ACTR10 CILK1 RHOT1 KIF1C DYNLT2B MYO1C TMEM108 DYNC1I1 MYO1A SUN2 CDC42 ARL8A HIF1A IFT88 LCA5L IFT52 PPFIA2 AP3B2 MREG BICD2 WASF1 INTU SUN1 KIF4A NEFH BICDL1 TU…	208	cytoskeleton-dependent intracellular transport	Intracellular Protein Transport	The primary biological process performed by this system of interacting proteins is intracellular protein transport. This process involves the movement of proteins within the cell, including their transport to specific organelles or cellular compartments. 1. Presence of motor proteins: The system includes several motor proteins such as kinesins (KLC3, KIF1A, KIF1C, KIF4A, KIF5C, KIF3A, KIF5B, KIF1…	0.302885	63	0.739688	20	0.998363	nicotinamide nucleotide metabolic process	0.25238	7976	0.346979	intracellular protein transport|intracellular protein transmembrane transport|intracellular transport|protein transport|protein transmembrane transport|regulation of intracellular protein transport|positive regulation of intracellular protein transport|protein transmembrane import into intracellular organelle|intercellular transport|transmembrane transport|cytosolic transport|regulation of intrac…	1.0|0.9275694|0.9115945|0.88056296|0.8692447|0.859317|0.83480906|0.8144301|0.8012629|0.7990037|0.7988963|0.7898295|0.78766036|0.78218526|0.76578504|0.7645546|0.7625251|0.75906146|0.74308074|0.73968834|0.73921895|0.73838675|0.73838043|0.7332498|0.7290123|0.72486913|0.7236598|0.717952|0.7174983|0.7142552|0.70738554|0.70516634|0.699839|0.6985976|0.6959201|0.6937614|0.6924896|0.6915255|0.6907923|0.68…	4.345074383891326e-20|0.489516215377681|1.7150875745898513e-222|1.1034376874293708e-28|0.19086730744702396|0.054831462163873426|0.03978826052319976|0.37144553540750513|1.0|0.9914044737285955|4.052161801952925e-13|1.4633075442795682e-11|0.09305015318165355|0.017438542373360462|1.1484107613406223e-07|0.3932243484716694|0.4159350687940365|1.0|1.0|0.0|0.01095751359544837|1.0|1.0|0.42303906886570064|1…	1.397130026974703e-19|0.6021109660242079|1.1433917163932343e-220|7.506378826050142e-28|0.271890751349037|0.08930205564148766|0.06407127298421862|0.5552250155568088|1.0|1.0|2.28935695025589e-12|8.174902482008761e-11|0.16616098782438132|0.03936465547033964|5.657195868673016e-07|0.6922963881543477|0.7688263748503448|1.0|1.0|0.0|0.024880532260196396|1.0|1.0|0.8012103577001906|1.0|1.0|1.0|1.0|0.085929…	1	1
GO:0060047	KCNIP2 GAA KCNJ3 GPX1 FOXN4 P2RX4 ACE NKX2-5 RGS2 ATP2B1 MDM2 CORIN YWHAE SCN10A SOD1 KCNA5 MAP2K3 RYR2 NOS3 NEDD4L TH EDN1 ATP2B2 ATG5 KCNE1 SLC4A3 HSPB7 GJC1 GPD1L CAV3 CALM1 CYP2J2 CLIC2 ADM2 TBX2 ADM5 SMAD7 HEY2 CALCA SRI ATP1B2 ATP2A1 SPTBN4 GJA1 SCN5A CAV1 HCN1 TMEM161B CCN2 APLN ADRA1B KCNJ2 MEF2A NOS1 CDC42 SLC9A1 GSTM2 THRB POPDC2 MTOR DSG2 TMEM38A AGT GATA4 APELA MYLK2 S100A1 ASB3 RGS4 …	243	heart contraction	Cardiac Electrophysiology and Signaling	The system of interacting proteins primarily involves proteins related to cardiac electrophysiology and signaling. The proteins play crucial roles in ion channel regulation, calcium handling, and signal transduction pathways, which are essential for maintaining normal cardiac function and rhythm. 1. Ion channel regulation: Several proteins in the system, such as KCNIP2, KCNJ3, KCNA5, SCN10A, SCN5…	0.18107	44	0.516169	192	0.98428	modified amino acid transport	0.295437	7561	0.380956	cellular response to electrical stimulus|cell-cell signaling involved in cardiac conduction|regulation of cell communication by electrical coupling|Purkinje myocyte to ventricular cardiac muscle cell signaling|response to electrical stimulus|endothelin receptor signaling pathway involved in heart process|cell communication by electrical coupling|regulation of cardiac muscle contraction by calcium…	0.70990956|0.70057064|0.6690595|0.6632425|0.66182244|0.6590687|0.65368164|0.6417553|0.6366073|0.63245153|0.63198864|0.6313335|0.6306927|0.6270035|0.62671965|0.6233981|0.6214274|0.6199177|0.6193435|0.61723334|0.6154503|0.6111672|0.6051023|0.6045151|0.6039561|0.60354227|0.6031908|0.6027691|0.6002815|0.59930074|0.5988864|0.597628|0.5953911|0.5928496|0.59274524|0.5919164|0.5917016|0.59089303|0.590576…	0.15747412324542526|1.5807387372702887e-66|1.9136076514363652e-27|7.623946604124473e-12|0.0003796881631380126|2.81256267828146e-06|4.415688035924269e-47|1.3559861176529518e-45|5.390024406103525e-119|5.005357269339465e-23|1.1264841311214462e-08|7.671525165839721e-16|2.799653641821275e-51|1.0|0.09646362374913947|1.0|1.0|0.34858217767869176|1.0|0.0005945710820451596|9.120004959521067e-194|0.05550373…	0.18058959087778126|1.463646978953971e-65|1.1812392910101019e-26|2.8661453398964182e-11|0.000778049514627075|8.176054297329827e-06|5.4514667110176165e-46|1.9651972719607996e-44|2.8368549505808026e-117|4.352484582034317e-22|4.793549494133814e-08|5.599653405722424e-15|5.38394931119476e-50|1.0|0.18444287523736036|1.0|1.0|0.6303475184063142|1.0|0.0016156822881661947|8.290913599564608e-192|0.116604478…	0.435401	1
GO:0050832	HRG SPI1 ZBP1 S100A9 LTF IL17A DEFB106A GPR15LG GAPDH USP15 DEFB119 DCD FAM3A IL36RN DEFA4 S100A12 HTN1 COTL1 MPO HAMP DEFB136 RARRES2 S100A8 DEFB4A CLEC4E CLEC4C CTSG JAGN1 IL17RA RNASE8 CLEC6A TRIM62 CX3CR1 ARG1 ELANE SPON2 CLEC7A NLRP10 CLEC4A GNLY DEFB106B CLEC4D IL17RC PLCG2 DEFA3 HTN3 CHGA DEFA1 CARD9 DEFA5 DEFB114 PLA2G5 BCL10 DEFA6 DEFA1B DEFB4B RNASE7	57	defense response to fungus	Neutrophil Activation and Antimicrobial Defense	The primary biological process performed by this system of interacting proteins is neutrophil activation and antimicrobial defense. Neutrophils are essential components of the innate immune system, and their activation is crucial for the elimination of invading pathogens. 1. Neutrophil activation: Several proteins in this system are involved in the activation of neutrophils. For example, IL17A an…	0.561404	32	0.510293	156	0.987228	regulation of hepatic stellate cell activation	0.287041	5811	0.524234	neutrophil activation involved in immune response|neutrophil activation|neutrophil mediated immunity|neutrophil chemotaxis|neutrophil aggregation|neutrophil migration|neutrophil degranulation|neutrophil-mediated killing of bacterium|neutrophil-mediated killing of gram-positive bacterium|neutrophil clearance|respiratory burst involved in defense response|positive regulation of neutrophil activatio…	0.8280409|0.8117657|0.8057068|0.77153736|0.74724394|0.7443934|0.73145986|0.730271|0.7172387|0.7041256|0.69950235|0.6911319|0.68966454|0.6847265|0.682671|0.68097115|0.67697656|0.67354995|0.66684365|0.6610341|0.6587308|0.6501592|0.6417263|0.64120096|0.63706416|0.63495386|0.6336267|0.632551|0.6307061|0.6268438|0.6266804|0.6232469|0.6213205|0.62079114|0.6201736|0.62010974|0.6196926|0.61594605|0.61572…	0.06758144842419413|0.008585882409635924|2.2113372153785555e-09|0.0052756755977726895|1.0859585155600844e-05|0.0009399880560334536|0.04556853261806041|0.0005858877255363736|0.006638309268701314|1.0|0.04874421376298881|1.0|0.01323331945086491|0.019785307957568842|1.0|0.03276132087961812|0.04556853261806041|1.2356533452575922e-05|1.0|1.0|7.503611407936139e-06|1.0859585155600844e-05|0.14506213473675…	0.07858307956301643|0.012178556609412658|6.5885932696170065e-09|0.008972237411178044|2.6422348310464342e-05|0.00206590781545814|0.07302649458022502|0.001307785101643691|0.013858683233196898|1.0|0.08418689769082698|1.0|0.02728519474405136|0.04377280521586027|1.0|0.06754911521570746|0.09473707405002164|4.789354051386016e-05|1.0|1.0|2.7998550029612458e-05|4.3612791789561625e-05|0.27578352611549983|1…	1	1
GO:0090263	RSPO3 CSNK1G2 DAAM2 NFKB1 XIAP EDA SFRP4 GPC3 USP47 COL1A1 SCEL JRK EGF PPM1A ATP6AP2 ASPM CAV1 SMURF2 SOX4 BMAL1 FGF9 GPC5 CSNK1G1 LRRK2 TMEM9 BAMBI NRARP USP34 USP8 ADGRA2 JUP RECK PPM1B TRPM4 WLS PPM1N FAM53B LGR6 LGR5 TGFB1 FZD9 CCAR2 DDX3X RBPJ GSKIP CAPRIN2 CTDNEP1 TTC21B EGFR WNK2 LRRK1 FGFR2 ZEB2 CSNK1G3 FRAT1 CSNK1D GPRC5B TNKS2 RSPO2 VCP SFRP1 RNF220 PRDM15 DLX5 RSPO1 WNT3A LGR4 SEMA5A …	104	positive regulation of canonical Wnt signaling pathway	Wnt Signaling Pathway Regulation	The primary biological process performed by this system of interacting proteins is the regulation of the Wnt signaling pathway. The Wnt signaling pathway is crucial for various cellular processes, including cell proliferation, differentiation, and migration. The proteins in this system interact to modulate the Wnt pathway, ensuring proper cellular function and development. 1. RSPO proteins (RSPO1…	0.317308	33	0.69344	17	0.998608	regulation of membrane depolarization	0.312899	3035	0.751515	regulation of Wnt signaling pathway|regulation of non-canonical Wnt signaling pathway|regulation of canonical Wnt signaling pathway|Wnt signaling pathway|cell-cell signaling by wnt|positive regulation of Wnt signaling pathway|Wnt signaling pathway, calcium modulating pathway|regulation of Wnt protein secretion|regulation of Wnt signaling pathway, planar cell polarity pathway|negative regulation o…	0.9574188|0.8863983|0.875482|0.8585698|0.7891529|0.77754676|0.7761049|0.77558637|0.7647524|0.76431584|0.7536169|0.752173|0.74112666|0.72602546|0.7088474|0.70692647|0.6934403|0.67679185|0.6763771|0.65519166|0.65193695|0.6426625|0.6399481|0.6323375|0.63184905|0.62730527|0.62595373|0.62537414|0.62368494|0.6149368|0.60848796|0.6056066|0.5960812|0.59533525|0.5927305|0.59076077|0.58895695|0.58720845|0.…	1.2891290553618034e-188|2.857406065590373e-18|1.1083584559953619e-203|6.754888988365108e-172|1.157551451332685e-171|2.209128005960785e-241|1.0|0.00021693055470845682|3.282266789690076e-10|5.154900930349178e-09|1.0163850030217097e-17|1.020137328944793e-192|0.0005380373693102766|2.693057658455611e-12|0.047518901338211024|4.279524712518545e-06|6.286976052473768e-275|0.0023716829595441945|1.382195747…	3.3054591163123166e-187|1.020502166282276e-17|5.277897409501723e-202|2.2516296627883693e-170|3.858504837775617e-170|1.5779485756862748e-239|1.0|0.0005056656286910416|1.5704625787990796e-09|2.112664315716876e-08|7.091778795710774e-17|7.286695206748521e-191|0.0014309504502932888|1.7153233493347842e-11|0.09580423656897384|1.6915117440784765e-05|2.0956586841579226e-272|0.00656975889070414|5.881684032…	0.000131442	0.00898262
GO:0090257	BECN1 ABCC8 CACNB1 P2RX4 NKX2-5 CALCRL MYL9 RGS2 ATP2B1 HDAC4 RHOA SCN10A SOD1 DOCK4 RYR2 NOS3 GATA5 EDN1 TNNC2 NPNT MYOG FOXO3 NR4A3 P2RX1 PPARG TOMM70 ADORA2B PLN SMAD4 TACR2 CAV3 CALM1 LMCD1 GTF2IRD1 ADRA2A CLIC2 SMAD7 CAMK2B CALCA SRI ATP2A1 FBXO32 CAV1 CAMK2G SCN5A SELENON CCN2 ABAT ADRA1B KCNJ2 PROK2 MEF2A PI16 NOS1 SLC9A1 GSTM2 AIF1 DSG2 AKAP6 AGT GATA4 ZDHHC21 CHRM3 TMEM38A MYLK2 ASB3 RGS…	232	regulation of muscle system process	Cardiac Contraction and Regulation	The interacting proteins in this system are predominantly involved in cardiac contraction and regulation. Key proteins include: 1. Myofilament proteins: MYL9, TNNC2, MYOG, MYL5, TNNT1, MYL3, TNNI2, TNNT3, TNNI1, MYH7, MYBPC3, ACTN3, MYL2, TNNC1, and TPM1. These proteins are essential components of the sarcomere, the basic contractile unit of muscle cells, and are responsible for muscle contractio…	0.37069	86	0.652781	46	0.996234	negative regulation of anoikis	0.197289	10183	0.166285	regulation of heart contraction|regulation of cardiac muscle contraction|regulation of cardiac muscle cell contraction|cardiac muscle contraction|regulation of the force of heart contraction|heart contraction|regulation of muscle contraction|cardiac muscle cell contraction|regulation of cardiac muscle contraction by calcium ion signaling|regulation of striated muscle contraction|regulation of ske…	0.9127095|0.9079192|0.8641913|0.85098505|0.84777033|0.839661|0.7945436|0.792755|0.7729768|0.75169677|0.7426914|0.741193|0.7370714|0.7337039|0.7280853|0.72510326|0.72196764|0.7216449|0.7110896|0.7065996|0.7045239|0.70156145|0.70134664|0.700692|0.6988189|0.6965638|0.69640386|0.6870706|0.68657035|0.68494576|0.6846045|0.6842059|0.6837542|0.679027|0.6725733|0.67196345|0.67134356|0.67068744|0.6692189|0…	9.936057157700358e-136|1.2396109516822256e-144|2.041126292995078e-63|3.8559575592859025e-132|3.9536803562055536e-33|1.364791213516393e-138|0.0|1.0551250373738736e-50|4.2107581604540634e-46|1.1359179226207957e-181|5.917448582335824e-29|9.966080513785772e-16|2.579262229295907e-09|8.877624429996138e-36|1.0|1.843939003128372e-38|4.3467434848494545e-10|9.966080513785772e-16|2.5223614659775734e-24|5.75…	1.4611848761324054e-134|2.6948064167004907e-143|2.5514078662438476e-62|9.404774534843664e-131|3.379213979662866e-32|3.8994034671896943e-137|0.0|1.758541728956456e-49|6.102548058629076e-45|7.099487016379973e-180|6.228893244564025e-28|7.169842096248756e-15|1.1165637356259337e-08|1.3871288171868966e-34|1.0|3.923274474741217e-37|2.5569079322643847e-09|8.445830943886248e-15|3.1529518324719665e-23|3.59…	0.0241894	0.417059
GO:0035108	FBN2 BAK1 ALX4 LMBR1 MBNL1 HOXA13 SP8 PBX2 ZNF219 HOXA9 PCSK5 GPC3 WNT3 SMAD4 HOXC10 GDF5 DLX6 TBX2 RDH10 GNA12 WNT5A SALL1 SOX4 ZBTB16 SOX11 ACD SEMA3C FGF9 RPGRIP1L CHST11 TMEM231 MSX1 IFT52 FMN1 BMP7 INTU ASPH RARG WDR19 IFT140 ZNF141 SHOX2 NOG PBX1 TP63 HAND2 PSEN1 RECK LNPK AFF3 COL2A1 MYH3 CIBAR1 B9D1 PKDCC ECE1 FZD6 DKK1 EXT1 RNF165 EVX2 NOTCH1 TULP3 IHH VPS54 TGFB2 GREM1 CACNA1C SKI SHH A…	143	limb morphogenesis	Limb Development and Patterning	The interacting proteins in this system are primarily involved in limb development and patterning. Key proteins include HOX genes, WNT signaling, FGF signaling, BMP signaling, and SHH signaling. 1. HOX genes: HOXA9, HOXA10, HOXA11, HOXA13, HOXC10, HOXC11, HOXD9, HOXD10, HOXD12, and HOXD13 are homeobox genes that play a crucial role in limb development by specifying positional identity along the p…	0.27972	40	0.894683	1	0.999918	positive regulation of inflammatory response	0.210084	9715	0.204601	limb morphogenesis|limb development|embryonic limb morphogenesis|limb joint morphogenesis|limb epidermis development|limb bud formation|hindlimb morphogenesis|embryonic hindlimb morphogenesis|embryonic digit morphogenesis|appendage development|embryonic skeletal limb joint morphogenesis|forelimb morphogenesis|proximal/distal pattern formation|body morphogenesis|pattern specification involved in k…	0.8946827|0.89281714|0.84236073|0.8199631|0.80013454|0.76856977|0.7678712|0.73417675|0.7336139|0.7335873|0.7250279|0.7099815|0.70914507|0.69352686|0.69262236|0.69122845|0.6903125|0.6903049|0.68440545|0.6810814|0.67901546|0.6714993|0.66898835|0.6685528|0.66767937|0.66683817|0.66510534|0.664243|0.6640284|0.6588197|0.6578585|0.6573953|0.6552103|0.6550621|0.65473425|0.65338814|0.6533543|0.65302026|0.…	0.0|1.7925e-320|8.756741876037252e-278|3.763155913018091e-11|1.0|9.189591112357362e-24|1.923644272991498e-75|3.745795960361236e-60|1.546980635630644e-122|1.7925e-320|5.682075785355773e-07|1.755757774572911e-86|8.4228912588635e-34|8.153239794650452e-17|0.0023932847344312926|1.2264339152672787e-15|0.005073266175906682|1.0|1.3498990203380178e-63|4.709712280189323e-06|0.015583912188747853|7.242440153…	0.0|1.79247e-318|9.729713195596947e-276|1.325054898950032e-10|1.0|5.779617051797083e-23|4.274765051092218e-74|7.203453769925455e-59|8.59433686461469e-121|2.560673e-318|2.120177531849169e-06|5.66373475668681e-85|1.1698460081754861e-32|6.17669681412913e-16|0.006382092625150114|1.1048954191597106e-14|0.013280801507609116|1.0|4.090603091933387e-62|1.6726779496785535e-05|0.03432579777257236|2.49739315…	0.704656	1
GO:0007584	BECN1 FOLR1 GPX1 LPL CCND1 TSHB ATP2B1 OXCT1 POR OGG1 ACSL1 IL15 NDOR1 RARA STC2 PPARG ADSL SLC34A1 FES ABCG5 STAT1 COL1A1 VCAM1 CYP24A1 MTHFR UCP3 EPO TYMS CDKN2D NR1H4 NQO1 SNW1 TFRC DNMT3A ARSB MTOR VDR MAP1B GDAP1 GATA4 RXRA SRSF2 BMP7 A2M TGFBR2 CYBB XBP1 CBS ALPL SPP1 AQP3 F5 POSTN HSF1 CYP27B1 OTC CDKN2B FOLR2 PDK2 SST LEP ARG1 LTA CYP1B1 ALAD ASCL1 CNR1 PTGS2 RXRB HLCS SLC27A4 TRIM24 SHAN…	155	response to nutrient	Oxidative Stress Response and Cellular Metabolism Regulation	The system of interacting proteins primarily involves the regulation of oxidative stress response and cellular metabolism. 1. Oxidative stress response: Several proteins in the system are involved in the response to oxidative stress, including GPX1, SOD2, and CAT. GPX1 (glutathione peroxidase 1) is an antioxidant enzyme that reduces hydrogen peroxide to water, protecting cells from oxidative dama…	0.0967742	15	0.483238	810	0.933683	positive regulation of defense response	0.29143	6482	0.469298	regulation of cellular response to oxidative stress|regulation of response to oxidative stress|cellular response to oxidative stress|response to oxidative stress|regulation of reactive oxygen species metabolic process|regulation of mRNA stability involved in response to oxidative stress|reactive oxygen species metabolic process|regulation of response to reactive oxygen species|cellular response t…	0.8345373|0.81280124|0.8034853|0.77627534|0.7709318|0.7429744|0.72792274|0.72377485|0.7112583|0.70967346|0.70640373|0.70457983|0.69930553|0.6937816|0.68824893|0.68681765|0.68426025|0.6841369|0.6764243|0.67637897|0.67342454|0.66996294|0.6696582|0.66937387|0.66904616|0.6669379|0.6668017|0.6653918|0.66295326|0.6607106|0.6592553|0.6585953|0.6574461|0.6543376|0.65159583|0.65056634|0.65024537|0.6494218…	0.006510729082602715|0.009706092003868521|3.816331752505865e-09|9.829918666019087e-19|5.107335191130137e-06|1.0|2.0172190628843545e-10|0.25916382795929743|5.352615845169849e-07|1.0|0.006007338817752495|1.0|0.02648299146919688|1.0|1.473171931297884e-13|9.322860084782774e-14|0.028106209325905525|0.1113954586452346|0.15856154970889033|1.354543354113759e-66|0.0008552190592644553|1.0|1.0|0.04439781134…	0.008272845085899257|0.01367055211812468|1.1191588717025996e-08|4.964605386878326e-18|1.2995763845114852e-05|1.0|8.440247125039141e-10|0.38972004204405625|1.808316163908733e-06|1.0|0.012515289203651032|1.0|0.051523329706608716|1.0|1.1160393418923363e-12|7.458288067826219e-13|0.06163642396031913|0.21299322876717897|0.31090499942919675|3.5645877739835765e-65|0.0024365215363659695|1.0|1.0|0.09757760…	0.000512354	0.0226635
GO:0002011	PLET1 PHLDB2 FLRT3 PTEN BMP7 ITGB1 FLNA LRG1 MSX2 CD44 CCN1 CARMIL2 DDR1 ARHGAP24 RHOA FERMT1 MMP12 DAG1 DLL4 RREB1 COL5A1 FERMT2 ACVRL1 ADAM17 CLASP1 LAMA1 JAG1 PALS1 SOS1 AJUBA DVL2 CEACAM1 PDCD10 LCP1 MEGF8 NOTCH2 HBEGF SRF WNT5A NOTCH1 ARHGAP35 CLASP2 HOXB2 MRTFA ARHGAP12 PHACTR4 CD151 HOXB4 TOR1A BMP5 LIN7C RHOC SOX11 TBX20 ITGA5 TMEFF2 PDPN DVL1 MTOR WNT7A	60	morphogenesis of an epithelial sheet	Cell Adhesion and Migration Regulation	The system of interacting proteins primarily performs the biological process of cell adhesion and migration regulation. This is supported by the following points: 1. Presence of adhesion proteins: ITGB1, FLNA, CD44, and CEACAM1 are involved in cell adhesion, which is crucial for cell migration. ITGB1 is an integrin that mediates cell adhesion to the extracellular matrix (ECM), while FLNA and CD44…	0.466667	28	0.447212	1008	0.917472	relaxation of skeletal muscle	0.300845	6435	0.473146	regulation of cell-matrix adhesion|regulation of cell-cell adhesion|regulation of cell adhesion|regulation of cell migration|regulation of calcium-dependent cell-cell adhesion|regulation of cell-substrate adhesion|regulation of calcium-independent cell-cell adhesion|regulation of leukocyte cell-cell adhesion|regulation of cell motility|regulation of cell-cell adhesion mediated by integrin|regulat…	0.8215747|0.817742|0.8160204|0.7816459|0.7447986|0.7439239|0.74155784|0.7402497|0.72784746|0.716444|0.7054384|0.7040845|0.7035551|0.703491|0.70262784|0.70191073|0.69903195|0.6983034|0.69792944|0.6958129|0.69198805|0.69121915|0.6893569|0.68506074|0.6827689|0.6823432|0.6798028|0.6700367|0.6699447|0.6696977|0.66628146|0.6614415|0.6597031|0.65957433|0.65744245|0.6567755|0.6566216|0.6539463|0.6531251|…	2.1756776804354307e-16|4.141689292288805e-05|2.2106844217289274e-18|2.751474318907142e-29|1.0|4.6898321923110875e-22|1.0|0.0387855249187571|2.303146661210446e-28|1.0|0.0008748983273774585|0.0034306706660123575|0.008055497301804508|4.967373352816751e-22|0.017377784316695847|0.15803821861865386|3.6846279218131196e-17|0.031065901820969185|0.007808250150083632|0.0024231505010815454|1.0|2.712507970410…	6.343083616429826e-16|7.304566653066676e-05|9.78178947667667e-18|1.8845714513062618e-28|1.0|2.8082827498868787e-21|1.0|0.06475045896286662|2.2803432289212335e-27|1.0|0.0021287063926458847|0.008470791767931746|0.017436141345897202|4.9673733528167505e-21|0.03887647498142247|0.28682072344583276|3.380392588819376e-16|0.06485574492895446|0.018769832091547194|0.006012780399706067|1.0|1.5770395176805546…	1	1
GO:0046849	PTH1R DEF8 LEPR MC4R RAB7A GDF5 CALCA TCIRG1 TPH1 GJA1 P2RX7 SNX10 NOX4 TMEM119 TFRC TNFRSF11A CTHRC1 FSHB PTN SUCO GPR55 GPR137 SPP1 PTK2B NCDN S1PR1 IL7 IAPP HTR1B LEP PPARGC1B P3H4 SPP2 EXT1 TGFB1 IHH RASSF2 GREM1 CLDN18 IL6 TGFB3 CSF1R TRAF6 LRRK1 TNFAIP3 SYT7 EPHA2 EFNA2 SFRP1 BGLAP INPP5D TNFSF11 PLEKHM1 LTBP3 LRP5L TF LGR4 IL20RA NOTCH2 DCSTAMP CARTPT CCDC154 SIGLEC15 ZNF675 LRP5 CD38 GPR1…	90	bone remodeling	Bone Remodeling and Energy Homeostasis	The primary biological process performed by this system of interacting proteins is bone remodeling and energy homeostasis. The proteins involved in this process are PTH1R, LEPR, MC4R, GDF5, CALCA, TCIRG1, TPH1, GJA1, P2RX7, SNX10, NOX4, TMEM119, TFRC, TNFRSF11A, CTHRC1, FSHB, PTN, SUCO, GPR55, GPR137, SPP1, PTK2B, NCDN, S1PR1, IL7, IAPP, HTR1B, LEP, PPARGC1B, P3H4, SPP2, EXT1, TGFB1, IHH, RASSF2,…	0.977778	88	0.738135	3	0.999754	cellular response to arsenite ion	0.354504	3514	0.712297	energy homeostasis|regulation of bone remodeling|bone remodeling|energy reserve metabolic process|ossification involved in bone remodeling|regulation of ossification|lipid homeostasis|multicellular organismal homeostasis|regulation of tissue remodeling|homeostatic process|glucose homeostasis|muscle cell cellular homeostasis|regulation of appetite|anatomical structure homeostasis|regulation of res…	0.8059819|0.743949|0.738135|0.717841|0.6280397|0.61385655|0.5969554|0.59694916|0.5960501|0.59350777|0.5925474|0.59137833|0.5882939|0.5854738|0.5837599|0.58306086|0.5822114|0.5821772|0.58133924|0.58114696|0.5785614|0.5785397|0.57740474|0.57701784|0.5755228|0.5726259|0.5705523|0.5705394|0.567454|0.56515753|0.5651495|0.5642427|0.56268907|0.56251335|0.56219804|0.5618371|0.5617596|0.56156015|0.5614009…	0.20275616573063412|6.520148843663486e-117|1.5892349112468296e-243|0.0009509873778077911|3.562039850164698e-12|2.16715405581364e-18|0.1994387514886511|1.1102534704956417e-82|5.908334070717854e-101|1.689312233545152e-54|3.4629089106790946e-05|1.0|0.005363077219053439|2.6033696164777613e-91|0.010090555627372369|0.0304374539782368|0.037606132154823495|1.0|1.0|0.14899861897174607|3.568139849970925e-0…	0.2314568101947878|1.0688768596169648e-115|1.222488393266792e-241|0.001797707708521344|1.4479836789287391e-11|1.1651365891471183e-17|0.30355974351392856|4.1120498907245993e-81|2.461805862799106e-99|3.1283559880465775e-53|0.00010337041524415207|1.0|0.01191794937567431|7.888998837811398e-90|0.024197975125593213|0.06301750306053168|0.08052704958206315|1.0|1.0|0.2694369239995408|0.0001221965702044837…	1	1
GO:0031396	CDC20 RIPK2 GTPBP4 PTEN BUB3 UFL1 SENP2 SEPTIN4 ANGPT1 MTA1 BRCA1 PHF23 ISG15 TBC1D7-LOC100130357 XIAP HSP90AB1 HSP90AA1 MAGEA2B ATG5 PSMD10 RBX1 DCUN1D4 RPL37 HUWE1 TICAM1 BUB1B DCUN1D2 N4BP1 CDC20B SMAD7 AKT1 SKP2 AXIN1 NDFIP1 PDCD6 SPOPL UBXN1 MAD2L2 CAV1 HDAC8 PRICKLE1 ARRDC3 SOX4 FYN RNF111 ABL1 UBE2D1 CBLB PELI1 FBXO5 CENPS-CORT HSPA1A COMMD3-BMI1 CHP1 NHLRC1 LRRK2 SQSTM1 NXN CDC14B U2AF2 R…	213	regulation of protein ubiquitination	Cell Cycle Regulation and Protein Degradation	The interacting proteins in this system are primarily involved in cell cycle regulation and protein degradation. Key proteins include CDC20, PTEN, BUB3, UFL1, SENP2, BRCA1, XIAP, HSP90AB1, HSP90AA1, ATG5, RBX1, DCUN1D4, BUB1B, AKT1, SKP2, AXIN1, PDCD6, MAD2L2, HDAC8, ABL1, UBE2D1, CBLB, FBXO5, HSPA1A, LRRK2, SQSTM1, PSEN1, USP4, PRKN, SPRTN, PARK7, BIRC7, DCUN1D1, DNAJB2, FKBP1A, DTX3L, DNAJA1, T…	0.57277	122	0.546912	143	0.988292	hypomethylation of CpG island	0.293542	7321	0.400606	regulation of cell cycle|regulation of cell cycle process|regulation of cell division|regulation of cell cycle checkpoint|regulation of mitotic cell cycle|cell cycle process|regulation of cellular catabolic process|cell cycle|regulation of protein catabolic process|cell cycle checkpoint signaling|cellular component disassembly|regulation of proteolysis|protein deglutarylation|response to cell cyc…	0.77126807|0.7678901|0.7090999|0.6974516|0.6885568|0.68704385|0.686882|0.66964376|0.6585681|0.6493616|0.6429156|0.63727427|0.63622606|0.63499236|0.6339849|0.63287127|0.63198|0.6314155|0.6308486|0.6286012|0.6270466|0.6259038|0.62164664|0.6207094|0.6190391|0.6181444|0.61600304|0.6150825|0.6143996|0.6117446|0.6060827|0.60577255|0.6053592|0.6053393|0.6047825|0.6044195|0.60346127|0.6013884|0.59958893|…	1.494926434827059e-19|1.563771107094562e-14|0.08561245244820669|0.0003131139698384596|3.2279918172671005e-12|1.1192012964213495e-16|7.66549207151861e-38|1.2503797621077761e-18|2.5053630728989306e-63|1.8219424274062917e-09|3.418591835400312e-06|4.0024938601761376e-52|0.024693267751833708|1.0|3.1764549398330216e-12|1.6232559847210268e-43|1.8664149548540767e-12|1.5339838807946992e-75|1.1469175045269…	4.7457982058001875e-19|4.8867847096705064e-14|0.11890618395584263|0.0006262279396769192|1.328391694348601e-11|5.739493827801792e-16|8.423617661009462e-37|8.62330870419156e-18|4.912476613527315e-62|7.720095031382592e-09|1.1627863385715348e-05|7.697103577261804e-51|0.0483234202579916|1.0|2.175654068378782e-11|3.775013917955876e-42|1.305185283114739e-11|4.382811087984854e-74|5.514026464071952e-07|3.…	1	1
GO:0045639	MAPK11 GATA2 RB1 TESC IL23A FOXO3 CTNNBIP1 GATA1 FES RUNX1 STAT5B STAT1 ETS1 RAB7B ACIN1 RIPK1 OCSTAMP PRKDC NEDD9 HIF1A HSPA1A ID2 IL34 HSF1 EVI2B ACVR2A POU4F1 ANKRD54 JAG1 RCOR1 PPARGC1B KLF10 PF4 THPO TAL1 TGFB1 BRD1 ABCB10 ACVR1B STAT3 IFNG TYROBP TRAF6 CCR1 KAT7 MAPK14 IL12B RHEX HOXA5 IL5 POU4F2 IL23R MED1 CD74 INPP5D TREM2 TNFSF11 FAXDC2 CSF1 SLC9B2 FADD PLA2G3 HMGB2 NOTCH2 DCSTAMP HAX1 L…	100	positive regulation of myeloid cell differentiation	Inflammatory Response Regulation	The system of interacting proteins primarily performs the regulation of inflammatory response. This is supported by the following observations: 1. Presence of key cytokines and their receptors: IL23A, IL12B, IL5, IL17A, IL20, IL34, CSF1, CSF3, LIF, and TNF are cytokines involved in immune response and inflammation. IFNG, IL23R, and MPL are receptors for these cytokines, mediating their effects. 2…	0.97	97	0.261287	8346	0.316686	somatic recombination of immunoglobulin gene segments	0.334161	4434	0.636974	regulation of inflammatory response|inflammatory response|regulation of acute inflammatory response|regulation of inflammatory response to antigenic stimulus|regulation of neuroinflammatory response|regulation of chronic inflammatory response|regulation of immune response|positive regulation of inflammatory response|regulation of inflammatory response to wounding|regulation of acute inflammatory …	0.96782136|0.87474644|0.8628423|0.8281362|0.8260507|0.82055414|0.7823856|0.7709544|0.7690541|0.7680383|0.7659925|0.7650169|0.7627316|0.7555064|0.7414707|0.7279985|0.7186681|0.7164691|0.7094023|0.70640457|0.6941576|0.69010454|0.6819515|0.68186|0.67747915|0.6765329|0.67447495|0.67089736|0.6703627|0.6687724|0.6660867|0.66587454|0.665799|0.6624207|0.6621822|0.66169715|0.6580793|0.657275|0.65617967|0.…	3.502560052455383e-08|8.135835391150158e-17|0.030712385702083206|4.927569971974503e-06|0.016735739353948426|0.05683327332629307|2.6165593795990067e-16|1.2390158531462615e-08|1.0|1.0|3.3198022379395648e-09|0.028417525669410155|0.017396962182766637|0.0006665251265620993|0.0019076671890353198|0.0009217320040315554|0.10524244231897323|2.2081498494974377e-07|3.4074933890309496e-08|0.000179858517023941…	6.735692408568044e-08|2.7767356283788937e-16|0.04498757145759232|1.1704441738656775e-05|0.02752588709530991|0.09241182654681801|1.5762405901198834e-15|4.640508813281878e-08|1.0|1.0|1.4754676613064732e-08|0.058232634568463434|0.034995226743117426|0.001937733293199507|0.005212205434522732|0.0025532742493948905|0.2055516451542446|1.0667390577282309e-06|1.784027952372225e-07|0.000528995638305711|1.30…	0.0479065	0.656254
GO:0006879	SLC46A1 FTHL17 SLC39A8 FRRS1 HEPHL1 ABCB7 SOD1 FTH1 SCARA5 EGLN1 ATP6V0D1 HJV SLC22A17 GLRX3 CCDC115 HAMP FLVCR1 ATP6V0A2 FTL LCN2 SLC11A1 ISCU STEAP4 NUBP1 SMAD4 CP CYBRD1 NCOA4 MYC ATP6V1A TF SLC40A1 CYB561 TMPRSS6 TTC7A ERFE IREB2 SRI FXN STEAP2 NDFIP1 BOLA2 ABCB6 HPX ATP13A2 ATP6AP1 HMOX1 HFE ATP6V1G1 IFNG TFRC BOLA2B TMEM199 ACO1 ALAS2 GDF2 CYB561A3 BMP6 FTMT HEPH HIF1A SLC11A2 TFR2 SLC39A14	64	cellular iron ion homeostasis	Iron Homeostasis and Regulation	The primary biological process performed by this system of interacting proteins is iron homeostasis and regulation. The proteins involved in this process are responsible for maintaining the balance of iron in the body, ensuring that it is available for essential cellular functions while preventing toxic accumulation. 1. Iron transport and uptake: Several proteins in this system are involved in th…	0.40625	26	0.875618	2	0.999836	DNA catabolic process, exonucleolytic	0.206736	9545	0.21852	iron ion homeostasis|cellular iron ion homeostasis|multicellular organismal iron ion homeostasis|regulation of iron ion transmembrane transport|regulation of iron ion transport|response to iron ion|response to iron(II) ion|response to iron(III) ion|response to iron ion starvation|cellular response to iron ion|regulation of iron ion import across plasma membrane|metal ion homeostasis|iron ion tran…	0.9422652|0.8756177|0.84179336|0.7837764|0.7809119|0.77181077|0.76710725|0.7553481|0.7520318|0.7410138|0.7209824|0.7203279|0.71063435|0.68857646|0.68098056|0.68034333|0.6788864|0.67775583|0.67774934|0.6649375|0.6589369|0.65492916|0.6526426|0.652248|0.6367847|0.62095344|0.60688996|0.60457724|0.5993361|0.599331|0.5987675|0.59829307|0.5960269|0.59204936|0.5918978|0.5914557|0.5881089|0.58628017|0.585…	9.498535680502603e-162|1.4782482803908643e-182|1.771311704907388e-13|1.9791335493241775e-07|1.2902781947351494e-11|1.4578568420492147e-24|0.022192429359576975|1.0|4.1052890682171476e-05|1.771311704907388e-13|1.3717370722864248e-05|3.853898570116718e-99|4.4069925208873766e-64|1.0|2.1271610595596715e-15|2.772919658332367e-141|5.6488283459658405e-28|0.025843732500385196|5.65132899309004e-16|2.511100…	1.7270064873641096e-160|4.34778905997313e-181|6.488321263397026e-13|5.153993618031712e-07|5.099913813182409e-11|9.466602870449446e-24|0.03774222680200166|1.0|0.00011531710865778505|1.0007410762188634e-12|4.368589402186066e-05|1.3763923464702564e-97|1.0492839335446133e-62|1.0|1.7435746389833374e-14|2.7729196583323672e-139|7.633551818872757e-27|0.05557791935566708|5.001176100079682e-15|2.7901115240…	1	1
GO:0046034	NADK NDUFC2 PRKAA1 ALDOA PFKM NDUFB1 COX2 NDUFA13 ATP5PO HDAC4 NDUFB10 BAD GAPDH PGK1 PFKP ENO2 NDUFS1 NDUFA5 ATP5PD ENO4 MLXIPL PGM1 FBP1 NDUFS5 ND1 DHTKD1 FIGNL1 ND3 ND4 ND2 NT5E SIRT6 SLC25A12 FIS1 P2RX7 SDHB PRKAG1 EP300 FLCN GCK OGDHL BPGM NDUFS2 ATP5PB NMNAT1 NDUFA2 HIF1A ATP5MGL CTNS PARG MTOR NDUFS4 NDUFA10 ARL2 HSPA1A ANTKMT SLC4A4 NDUFS3 NDUFB6 EIF6 ALDOB PKM PGAM2 OLA1 ATP5MC1 ATP5PF H…	214	ATP metabolic process	Oxidative Phosphorylation	The primary biological process performed by this system of interacting proteins is oxidative phosphorylation. This process is responsible for generating the majority of cellular ATP, the primary energy currency of the cell. 1. Electron transport chain (ETC) components: NDUFC2, NDUFB1, NDUFA13, NDUFB10, NDUFS1, NDUFA5, ND1, ND3, ND4, ND2, NDUFS5, NDUFS2, NDUFA2, NDUFS4, NDUFA10, NDUFS3, NDUFB6, ND…	0.481308	103	0.585332	36	0.997053	negative regulation of peptidyl-threonine phosphorylation	0.293121	5710	0.532504	oxidative phosphorylation|regulation of oxidative phosphorylation|positive regulation of oxidative phosphorylation|negative regulation of oxidative phosphorylation|aerobic respiration|cellular respiration|pentose-phosphate shunt, oxidative branch|aerobic electron transport chain|oxygen metabolic process|glycolytic process|phosphorylation|electron transport chain|respiratory electron transport cha…	0.99999976|0.80342305|0.8013146|0.7272001|0.7227429|0.72211516|0.71065676|0.6911854|0.6779686|0.6695447|0.6656251|0.66295|0.66080403|0.6484431|0.6419567|0.6418315|0.63553|0.623307|0.622246|0.6209703|0.6161108|0.61291707|0.61182576|0.61068976|0.6092347|0.6073371|0.60526776|0.60116494|0.5992749|0.5964777|0.593246|0.5912342|0.58987683|0.5876401|0.58748806|0.58533204|0.5853045|0.58516705|0.5846319|0.…	9.143730473107439e-111|1.6360839306238285e-07|0.00015507569253212828|0.00413222388028301|5.678968114387824e-110|2.809224723567173e-117|1.0|9.511820670965215e-67|1.0|8.794243459682279e-169|1.95478766031673e-41|1.0776016617362465e-61|3.269292910700096e-72|0.18213150199652545|0.047703576241565786|0.08418212346306284|2.1952957862695075e-70|0.18213150199652545|1.0|7.593804732457398e-51|3.3706041454517…	1.0510035026560275e-109|3.5567041970083225e-07|0.0003151944970165209|0.007100041031414106|1.0921092527668893e-108|6.688630294207554e-116|1.0|2.319956261211028e-65|1.0|3.997383390764673e-167|2.714982861551014e-40|2.5657182422291585e-60|9.081369196389156e-71|0.3462576083584134|0.09598305078785872|0.15823707417868954|6.456752312557375e-69|0.33603598154340486|1.0|1.5497560678484486e-49|1.404418393938…	0.192349	1
GO:0030500	FBN2 ANO6 CCN1 ATP2B1 NELL1 GATA1 ATRAID WNT4 NBR1 BMPR1B P2RX7 TMEM119 STATH RFLNB MEF2C PHOSPHO1 HIF1A VDR ACVR2B RXRA BMP7 ACVR1 PTN RFLNA CYP27B1 ACVR2A OMD PTK2B MGP FAM20C S1PR1 CCL3 PKDCC TRPM4 TGFB1 RXRB TENT5A FZD9 GREM1 AHSG ZNF664-RFLNA TGFB3 BMP2 IFITM5 SOX9 CCR1 ACTN3 ZMPSTE24 MATN1 BGLAP LTBP3 ANKH OSR2 NOTUM BMPR1A GPM6B SMAD3 SGMS2 COMP FGF23 ADGRV1 OSR1 BMP4 TXLNG SRGN LTF BMPR2 …	82	regulation of bone mineralization	Bone Morphogenetic Protein (BMP) Signaling	The primary biological process performed by this system of interacting proteins is Bone Morphogenetic Protein (BMP) signaling. This process is crucial for various aspects of development, including bone and cartilage formation, cell differentiation, and tissue repair. 1. Central role of BMPs: BMP2, BMP4, BMP6, and BMP7 are part of the transforming growth factor-beta (TGF-Œ≤) superfamily and play a…	0.329268	27	0.547361	112	0.99083	regulation of postsynaptic membrane organization	0.283541	7052	0.42263	BMP signaling pathway|positive regulation of BMP signaling pathway|regulation of BMP signaling pathway|BMP signaling pathway involved in heart development|BMP signaling pathway involved in heart induction|mesenchymal cell differentiation involved in bone development|SMAD protein signal transduction|cellular response to BMP stimulus|activin receptor signaling pathway|canonical Wnt signaling pathwa…	0.94732344|0.7972603|0.79554236|0.76517576|0.73239934|0.72655404|0.71160865|0.7100443|0.70782024|0.67253226|0.6636456|0.66297996|0.64796364|0.6456416|0.6410249|0.64041984|0.6378981|0.63069665|0.62920654|0.6283374|0.62431884|0.6231762|0.6215302|0.620697|0.62028426|0.61751413|0.61508805|0.61504674|0.6147566|0.6143297|0.60935485|0.60922056|0.60816085|0.6076247|0.6058998|0.60555136|0.60539544|0.60513…	8.757195625430373e-16|0.0008511288356408441|0.0015547625484573662|1.682421696638654e-08|2.2596918735432687e-05|1.0|2.559423580108847e-10|9.185801826322962e-17|2.898363767988789e-06|1.0|0.2394536925241068|2.8370209577341346e-15|1.0|5.660003567530404e-26|1.0|1.849034088646674e-12|1.3967914906498481e-14|0.0827164902946971|0.04223992731206281|6.773301037757465e-06|0.1544949118531484|0.001208508621407…	2.4668156691353167e-15|0.0013403603710879434|0.0028064305928833322|4.8206925405119026e-08|5.304441017707204e-05|1.0|1.0576130496317549e-09|5.741126141451851e-16|9.172037240470852e-06|1.0|0.3837398918655558|1.9839307396742202e-14|1.0|6.219784140143301e-25|1.0|1.3696548804790177e-11|1.1174331925198785e-13|0.16155564510683026|0.08836804877000588|2.368287076138974e-05|0.28244042386315976|0.0037299648…	1	1
GO:0080164	HBB PKD2 TSPO P2RX4 SOD2 CLU DDAH2 DYNLL1 ASS1 TRPV1 CD47 INSR HSP90AB1 HSP90AA1 EDN1 PTK2B DNM2 GLA IL1B NOS1AP KHSRP SIRPA TICAM1 CX3CR1 ZC3H12A PTX3 TLR6 IL10 KLF4 CLEC7A AGXT2 RAC1 ASL AKT1 KLRK1 TMEM106A CD34 PTGIS PTGS2 KLRC4-KLRK1 TLR4 RGN CAV1 DDAH1 SMAD3 AGTR2 TNF KLF2 IFNG ATP2B4 CD36 ACP5 NPY SELENOS ROCK2 AIF1 JAK2 MMP8 AGT	59	regulation of nitric oxide metabolic process	Inflammatory Response and Oxidative Stress Regulation	The primary biological process performed by this system of interacting proteins is the regulation of inflammatory response and oxidative stress. The proteins involved in this process are: 1. HBB: Hemoglobin subunit beta, involved in oxygen transport and protection against oxidative stress. 2. PKD2: Polycystin-2, a calcium channel involved in cellular calcium homeostasis. 3. TSPO: Translocator pro…	0.661017	39	0.529446	299	0.97552	ventricular cardiac muscle tissue morphogenesis	0.255837	8464	0.307025	regulation of inflammatory response|regulation of acute inflammatory response|response to oxidative stress|regulation of response to oxidative stress|regulation of cellular response to oxidative stress|regulation of chronic inflammatory response|regulation of response to reactive oxygen species|cellular response to oxidative stress|integrated stress response signaling|response to reactive oxygen …	0.7716309|0.7706789|0.75923955|0.75781167|0.73934567|0.7368408|0.73434645|0.73315406|0.7247504|0.7187371|0.7184865|0.69524753|0.6903171|0.6889325|0.68532336|0.68356514|0.67899024|0.67821616|0.67015433|0.6684631|0.6660595|0.66573405|0.66495866|0.663985|0.66240776|0.661611|0.65642697|0.65451276|0.6543695|0.6534365|0.65171343|0.65079087|0.65076655|0.64909434|0.6481658|0.6461283|0.6452019|0.643523|0.…	4.811972005579065e-15|5.573822978604826e-07|1.812838765247574e-15|2.762504553481079e-08|1.231144788876402e-08|0.0005146822956817605|0.005739761942465019|1.642683412111554e-14|1.0|1.0070728344216213e-09|5.429749530531585e-06|1.0|1.7468232041347876e-07|2.3856288237549825e-08|0.004452613241971777|0.043838973924532766|4.4164402160846496e-07|4.4237380218691775e-26|1.0|2.766310681009039e-07|1.195290757…	1.318348494679196e-14|1.1516163178935591e-06|7.222465200189537e-15|7.803685179325083e-08|4.023348983256216e-08|0.001177762690347278|0.010809344524416231|9.280697243568101e-14|1.0|4.397697966906643e-09|1.822063600849525e-05|1.0|6.796977447995283e-07|1.1200135322793345e-07|0.01138775765210173|0.08698209112010469|1.928576513574083e-06|5.529672527336472e-25|1.0|1.1431035871938178e-06|8.78890262547225…	1	1
GO:0002707	CSMD3 PPP3CB SERPINB9 AHR LILRB1 GFER ARRB2 CRK CR1L DUSP22 HAVCR2 NCKAP1L FOXP3 FOXJ1 NOD2 IFNB1 XCL1 CLEC12B HLA-E MICA ARG1 HLA-A KIR2DL4 CEACAM1 SMAD7 TBX21 HLA-G CR2 CD46 NDFIP1 HLA-B KLRC1 PTPN6 SUSD4 FCGR2B C4BPA CD55 CLEC4G PARP3 SLAMF1 LILRB4 IL7R CR1 C4BPB LGALS9 HFE SERPINB4 PTPRC THOC1 KLRD1 BCL6 IL20RB IL4I1 CD96 IFNA2 HLA-F	56	negative regulation of lymphocyte mediated immunity	Immune Regulation and Response	1. Immune cell signaling and activation: Several proteins in this system, such as CRK, NCKAP1L, and PTPN6, are involved in immune cell signaling and activation. CRK is an adaptor protein that mediates signaling pathways in immune cells, while NCKAP1L is involved in actin cytoskeleton regulation and immune cell activation. PTPN6 is a protein tyrosine phosphatase that negatively regulates signaling…	0.625	35	0.447107	1045	0.914442	secondary alcohol metabolic process	0.283983	6828	0.440969	regulation of immune response|immune response|regulation of immune system process|regulation of adaptive immune response|regulation of inflammatory response to antigenic stimulus|immune system process|regulation of tolerance induction dependent upon immune response|adaptive immune response|positive regulation of immune response|regulation of immunoglobulin mediated immune response|inflammatory re…	0.9239131|0.9094367|0.81115454|0.81112325|0.7926892|0.7859261|0.78359187|0.77626336|0.7753595|0.7677114|0.7639891|0.76179594|0.7524055|0.75084484|0.7466526|0.74542904|0.7419206|0.74151117|0.7394775|0.7351655|0.7314964|0.7283055|0.7269507|0.7265973|0.72492546|0.71838|0.71297765|0.7061697|0.6969926|0.6885319|0.6885295|0.68849564|0.6856139|0.6814383|0.68140346|0.67831904|0.67124164|0.6697571|0.66303…	4.284502991179869e-75|5.7066182519578214e-58|8.096055840139162e-62|4.009230540961014e-82|1.1456678424979933e-05|9.76201294532451e-49|3.136962694309249e-05|2.6971338307394104e-66|1.0200123563062453e-32|8.407905515274354e-41|2.4496753529828586e-08|0.009078660289042051|5.797059763569494e-31|1.3555377775606201e-30|3.1127938297805947e-06|9.396005608058983e-05|5.798599551930106e-32|6.414456864813305e-2…	3.570419159316557e-74|4.877451497399847e-57|9.754284144745978e-61|6.074591728728809e-81|2.7740141464842453e-05|1.0610883636222293e-47|7.982093369743636e-05|6.421747216046215e-65|1.1860608794258667e-31|1.151767878804706e-39|1.0122625425549002e-07|0.020727534906488702|7.72941301809266e-30|1.7836023388955528e-29|1.3189804363477097e-05|0.00031636382518717115|9.352579922467912e-31|6.612842128673509e-1…	1	1
GO:0001942	DSG4 DNASE1L2 ALX4 SAV1 SOX18 TMEM79 NSDHL EDA SOX21 PDGFA SMAD4 KRT27 SOS1 CD109 WNT5A LDB2 PLA2G10 FGF7 FST PIAS4 TRPC4AP SNAI1 ZDHHC21 INTU FERMT1 MYSM1 BCL2 TP63 RELA FOXN1 FZD6 DKK1 LGR5 EXT1 NOTCH1 NGFR TGFB2 ACVR1B DKK4 FUZ RBPJ KRTAP21-1 EGFR DLX3 SHH FGFR2 SOX9 EDAR ZMPSTE24 FOXE1 LDB1 ERCC2 TGM3 KRT84 KRT25 FOXQ1 SPINK5 HDAC2 LHX2 LGR4 FZD3 APCDD1 SMO LAMA5 GORAB TNF KRT71 PUM2 IGFBP5 K…	91	hair follicle development	Epidermal Differentiation and Hair Follicle Development	The primary biological process performed by this system of interacting proteins is epidermal differentiation and hair follicle development. The proteins involved in this process are essential for the formation and maintenance of the skin and hair. 1. Keratinocyte differentiation: Proteins such as DSG4, KRT27, KRT84, KRT25, and KRT17 are keratins and desmosomal proteins that play a crucial role in…	0.428571	39	0.858203	1	0.999918	viral gene expression	0.314732	4537	0.628541	hair follicle development|hair follicle morphogenesis|epidermis development|epidermal cell differentiation|keratinocyte development|skin epidermis development|hair follicle maturation|keratinocyte differentiation|skin development|sebaceous gland cell differentiation|sebaceous gland development|epidermis morphogenesis|epithelium development|corneocyte development|epithelial cell development|dermat…	0.8582026|0.81750166|0.8160414|0.8114859|0.808375|0.7950967|0.79348236|0.75967515|0.747832|0.7455109|0.7400987|0.7357842|0.7321663|0.7249936|0.71421874|0.7124682|0.70852983|0.7005593|0.70049465|0.69516516|0.691182|0.6888195|0.6680541|0.6676553|0.6672039|0.6606957|0.65400743|0.6532084|0.65127283|0.6482975|0.6479198|0.64251506|0.64231384|0.6402302|0.6394948|0.63456714|0.6339105|0.6326872|0.63103455…	8.47964684424559e-246|9.211405822548526e-74|2.4132439471702565e-158|1.737270798249581e-24|0.06686720801280333|2.699533731253741e-239|2.2189626673524474e-35|8.685616522343918e-19|1.116911500336135e-166|1.0|9.30132940737707e-10|4.757896471414465e-69|2.2128824248405242e-107|0.01583956405197039|2.020816778499564e-08|1.0|0.010587476339910317|3.76913519029058e-12|0.005479561886849379|7.937835723012938e…	3.533186185102329e-244|9.304450325806592e-73|7.541387334907051e-157|1.0658103056745897e-23|0.09876987889631214|1.7996891541691606e-237|2.196992739952918e-34|6.0738577079328104e-18|8.591626925662578e-165|1.0|4.387419531781637e-09|1.3216379087262404e-67|9.220343436835516e-106|0.036246141995355585|1.0470553256474424e-07|1.0|0.025328890765335687|2.654320556542662e-11|0.013802422888789367|1.4174706648…	0.410437	1
GO:0009798	TDRD7 SENP2 MESP2 SETDB2 MNS1 LHX1 WNT8A GPC3 CDX1 WNT3 SMAD4 PAX6 SIX3 PGAP1 HEY2 AXIN1 GDF3 WNT5A PRICKLE1 RIPPLY2 WNT6 MDFI ARL13B FRS2 COBL NRARP DDIT3 TDRD10 CER1 HOXD8 WLS NOTCH1 BASP1 OTX2 SMAD6 SKI SHH PCSK6 TMED2 WDR77 VAX2 TDRD15 TTC8 LDB1 FZD5 STC1 SFRP1 DCANP1 SMAD2 TASOR TBXT CDX2 FOXA2 TDGF1 SMO NOTCH2 CDX4 CITED2 TDRD5 BMPR1A IRX4 TBX6 RIPPLY1 TDRD1 PITX2 HSPB11 BMP4 IFT172 ETS2 AH…	97	axis specification	Wnt/Notch Signaling and Axis Formation	1. Wnt signaling pathway: WNT1, WNT3, WNT5A, WNT6, WNT7A, WNT8A, FZD5, AXIN1, AXIN2, CTNNB1, and GSK3 are involved in the Wnt signaling pathway. This pathway is crucial for cell proliferation, differentiation, and migration during embryonic development and tissue homeostasis. 2. Notch signaling pathway: NOTCH1, NOTCH2, DLL1, and NRARP are components of the Notch signaling pathway. This pathway is…	0.515464	50	0.708256	5	0.999591	glycerol ether metabolic process	0.262166	7895	0.353611	embryonic axis specification|specification of axis polarity|nodal signaling pathway|neural plate axis specification|axis specification|planar cell polarity pathway involved in axis elongation|Notch signaling pathway|non-canonical Wnt signaling pathway|Wnt signaling pathway|canonical Wnt signaling pathway|zygotic specification of dorsal/ventral axis|dorsal/ventral axis specification|Norrin signali…	0.731822|0.71581495|0.7136058|0.70990413|0.70825577|0.70165974|0.7008538|0.6996175|0.6956001|0.6953916|0.6922046|0.69131315|0.67303634|0.6675339|0.65906966|0.6580882|0.6573906|0.65604514|0.65539974|0.6511545|0.6504493|0.6435438|0.6416857|0.6392025|0.637666|0.6375629|0.6349597|0.6339756|0.6292963|0.62858725|0.6264433|0.6257688|0.6257614|0.62467897|0.6238856|0.62287533|0.6228608|0.6227465|0.6223696…	3.756685534924419e-102|9.62712171938427e-10|4.927489602924164e-10|3.168059428851988e-05|2.454524911928274e-259|0.00031330912607099057|5.084482852939297e-09|3.5175053691303335e-06|1.0454397792308984e-19|2.562367206117606e-16|3.168059428851988e-05|5.313269096390828e-28|1.0|4.059885267882636e-21|1.2092099838778052e-05|0.02244112223830048|0.0016854407787453216|0.2515734498827239|1.0870983051556311e-1…	4.0394468117466874e-101|2.449649292464191e-09|1.5350434900075277e-09|6.978104468836977e-05|1.8880960860986725e-257|0.0007371979436964484|1.8223952877918627e-08|1.0195667736609662e-05|7.9199983275068055e-19|1.6857678987615828e-15|9.485207870814335e-05|6.037805791353214e-27|1.0|3.9416361824103267e-20|4.6687644165166224e-05|0.04784887470852981|0.004801825580471002|0.45823943512335863|6.7104833651582…	1	1
GO:0045913	PPP1R3E PRKAA1 SIRT1 ACTN3 PTH1R P2RY6 HRH1 SORBS1 MLST8 SLC4A4 PHKG2 P2RY1 ADCYAP1R1 PPP4R3B NFKB1 IGF2 PTPN2 PTAFR GCG IGF1 INSR AVPR1B DGAT2 MLXIPL PRKAA2 GPER1 LHCGR PTH PSEN1 SNCA EPM2AIP1 DDB1 GPLD1 HTR2A AKT2 HAS2 APP GPT MAS1 AKT1 SLC25A12 SLC45A3 EGF P2RX7 IRS1 NNMT DYRK2 INS RGN PDGFB WDR5 ARPP19 GPD1 GAPDHS CRY1 ARNT CD244 GCK PPARGC1A KAT2B KAT2A RPTOR NTSR1 PMAIP1 PRXL2C IFNG PPP1R3G…	76	positive regulation of carbohydrate metabolic process	Insulin Signaling and Energy Metabolism	The primary biological process performed by this system of interacting proteins is insulin signaling and energy metabolism. The proteins involved in this process are crucial for maintaining glucose homeostasis, regulating cellular growth, and responding to cellular stress. 1. Insulin signaling: Key proteins involved in insulin signaling include INSR, IRS1, IRS2, AKT1, AKT2, and MTOR. INSR is the …	0.302632	23	0.414957	1106	0.909448	signal transduction involved in regulation of gene expression	0.389431	1688	0.861798	insulin metabolic process|insulin receptor signaling pathway|glucose mediated signaling pathway|energy homeostasis|insulin-like growth factor receptor signaling pathway|adiponectin-activated signaling pathway|energy reserve metabolic process|regulation of insulin receptor signaling pathway|glucose homeostasis|regulation of glucose mediated signaling pathway|cellular glucose homeostasis|insulin se…	0.79056597|0.7356559|0.70135415|0.6919082|0.67893904|0.6649699|0.66052425|0.65455747|0.65257245|0.64921147|0.6462574|0.64315736|0.63638437|0.6360893|0.6327769|0.6282865|0.62577426|0.619014|0.61639965|0.61572224|0.61542696|0.61495316|0.61308193|0.6115757|0.60945857|0.6068061|0.5987545|0.59871304|0.5984423|0.59786904|0.5928379|0.589267|0.58906806|0.58839405|0.58557117|0.58204085|0.57967544|0.579394…	1.0|3.353479834939527e-16|0.03062513756408237|3.321417129782988e-08|5.503078352623259e-05|1.0|2.3557693856821907e-24|6.874346599901869e-10|1.739020643937737e-23|1.0|2.966163816071704e-15|0.00017418922925487593|8.492302097299543e-24|3.889128002529318e-17|8.85464320241924e-05|0.09719285808804613|9.92943925651183e-21|1.0|1.0|1.8561708988391253e-11|1.0|1.0|1.0|4.915880380783218e-66|4.515438273812274e…	1.0|1.117826611646509e-15|0.04497083342743373|9.32982339826682e-08|0.0001233874070094901|1.0|1.8549365241592052e-23|2.8173551638942086e-09|1.4991557275325318e-22|1.0|1.819732402497978e-14|0.0005310647233380363|8.939265365578466e-23|3.0322466981136405e-16|0.00029713567793353154|0.18132995911948904|1.0452041322644031e-19|1.0|1.0|1.1318115236823934e-10|1.0|1.0|1.0|2.1373392959927034e-64|5.3122803221…	0.0931679	0.964267
GO:0007292	TRIP13 SIRT1 EREG IL4R NCAPH2 TDRD7 SPIRE1 RGS2 NDC80 NANOS3 NOS3 RPS6 FIGLA CDC25B EDN1 FOSL1 FOXO3 NANOS2 IMMP2L KMT2D AMH OOSP2 DDX20 C14orf39 SOS1 BMP15 RAD51C AURKC TOP2A YTHDF2 MMP2 IHO1 TNFAIP6 HSF2BP WNT4 GAS2 PLAT MSH4 BMPR1B INSL3 ASPM BNC1 TOB2 NPM2 METTL3 PAQR7 YBX2 DIAPH2 REC8 FBXO5 SHB CGB5 FSHB BCL2L10 SEBOX PTN FOXL2 NANOS1 ZGLP1 HROB YTHDC1 EDNRA PTK2B BCL2 LEP TDRD10 ZP3 PTX3 TT…	161	female gamete generation	Meiotic Regulation and Fertility	The interacting proteins in this system primarily contribute to the regulation of meiosis and fertility. Key proteins involved in these processes include: 1. Meiotic regulation: SPO11, REC8, DMC1, RAD51C, and BRCA2 are essential for initiating and maintaining meiotic recombination. SPO11 is responsible for generating DNA double-strand breaks (DSBs), while REC8 is a meiotic cohesin that holds sist…	0.136646	22	0.548003	120	0.990175	Fc receptor mediated inhibitory signaling pathway	0.368136	2577	0.789013	meiotic cell cycle process|meiotic cell cycle|regulation of meiotic cell cycle|meiotic DNA repair synthesis|regulation of meiotic nuclear division|regulation of meiosis I|meiotic cell cycle phase transition|meiotic gene conversion|germline cell cycle switching, mitotic to meiotic cell cycle|male meiosis I|meiotic mismatch repair|meiotic cell cycle checkpoint signaling|male germ-line sex determina…	0.7703949|0.7545341|0.7467679|0.73306614|0.71207285|0.70972335|0.7064988|0.70364475|0.7001968|0.6967075|0.6963807|0.6906578|0.68528914|0.6831709|0.68207365|0.6819358|0.6803013|0.6799969|0.6755333|0.6740753|0.66794413|0.6672234|0.6669886|0.66658676|0.6654525|0.6641419|0.6634737|0.66146576|0.66025007|0.65717053|0.656723|0.6537481|0.6536121|0.65261203|0.65057147|0.6466265|0.6458911|0.64504117|0.6433…	2.1888425945914694e-78|2.7305654614411795e-81|4.89634937789128e-31|1.0|9.86747697260047e-23|3.2288945800942425e-06|2.3484191010762524e-06|0.02790937513506847|0.0002612905867838561|2.6878489106041088e-12|0.018693346952313585|4.3968738458006634e-05|1.0|1.605280888069518e-44|4.645458457504996e-175|3.5024915395265626e-46|1.2716505288468394e-43|4.213293282282411e-34|9.573758374038984e-39|5.60262289643…	1.839363524866781e-77|3.0680510802709883e-80|3.424020543979916e-30|1.0|6.325305751666967e-22|9.332065260387985e-06|6.690652709618953e-06|0.04836980092732838|0.0006665576193465717|1.3783840567200557e-11|0.03527046594776148|0.00014002782948409757|1.0|3.1476095844500356e-43|4.22314405227727e-173|8.339265570301338e-45|2.5952051609119173e-42|6.481989665049863e-33|1.8411073796228817e-37|4.7080864675884…	1	1
GO:0032755	RIPK2 MAPK13 ARID5A EREG CYBA LPL IL17F ADORA2B TICAM1 SPON2 CLEC7A MBP MYD88 BTK WNT5A TLR4 P2RX7 RAB7B CARD9 PYCARD TLR8 SELENOK LBP TLR3 AIF1 HSPD1 MMP8 DHX9 C1QTNF4 LILRB2 POU2F2 XBP1 UNC93B1 TNFSF4 NOD1 UCN LEP TLR7 MAVS IFIH1 IL17D TLR9 IL33 STAT3 IFNG TYROBP IL6R IL6 INAVA HMGB1 BCL10 TLR1 TRAF6 ZBTB20 RIGI POU2AF1 IL36A PTAFR CD74 F2R IL1RAP TSLP NOD2 IL1B IL17RA TLR6 AGER NLRP10 IL1A APP…	96	positive regulation of interleukin-6 production	Inflammatory Response Regulation	The system of interacting proteins primarily performs the regulation of inflammatory response. This is evident from the presence of several key proteins involved in inflammation and immune response pathways. 1. TLR family proteins (TLR1, TLR2, TLR3, TLR4, TLR6, TLR7, TLR8, TLR9) are critical for recognizing pathogen-associated molecular patterns (PAMPs) and initiating innate immune responses. The…	0.479167	46	0.219483	10228	0.1626	positive regulation of meiotic cell cycle	0.232294	9676	0.207794	regulation of inflammatory response|inflammatory response|regulation of acute inflammatory response|regulation of inflammatory response to antigenic stimulus|regulation of neuroinflammatory response|regulation of chronic inflammatory response|regulation of immune response|positive regulation of inflammatory response|regulation of inflammatory response to wounding|regulation of acute inflammatory …	0.96782136|0.87474644|0.8628423|0.8281362|0.8260507|0.82055414|0.7823856|0.7709544|0.7690541|0.7680383|0.7659925|0.7650169|0.7627316|0.7555064|0.7414707|0.7279985|0.7186681|0.7164691|0.7094023|0.70640457|0.6941576|0.69010454|0.6819515|0.68186|0.67747915|0.6765329|0.67447495|0.67089736|0.6703627|0.6687724|0.6660867|0.66587454|0.665799|0.6624207|0.6621822|0.66169715|0.6580793|0.657275|0.65617967|0.…	2.8431053295364096e-35|2.967380540883057e-67|0.00013689448826237322|9.635201503312352e-05|3.1178623069195524e-08|0.0013559772090363238|8.40540178698686e-58|1.1912000750951746e-39|1.0|0.08080779069636759|9.828914358610686e-50|2.2706915342189174e-07|0.016704988235498406|1.0699249011896763e-18|0.05290170787893614|9.335221189831316e-06|0.0049864729525476515|3.3110004602838735e-06|9.713027172842989e-2…	1.36687756227712e-34|2.799415604606658e-66|0.00027937650665790456|0.00020199583864386484|9.835527782080606e-08|0.002916080019432954|1.313344029216697e-56|1.527179583455352e-38|1.0|0.1437861044419352|1.7870753379292155e-48|9.344409605839166e-07|0.03374745098080486|9.638963073780867e-18|0.10496370610900027|3.509481650312524e-05|0.013087855518497773|1.3569674017556859e-05|1.3875753104061412e-26|5.07…	0.131054	1
GO:0007568	GJB2 BECN1 GPX1 BAK1 ACE MBD3 P2RY1 ATP2B1 SOD1 TH RETN OGG1 IL15 EDN1 FOXO3 JUND PAX2 SMAD4 AMH SEC63 VCAM1 IL10 SCAP CLDN1 ND4 UCP3 RPN2 MBP EPO MMP2 CALCA GNA12 NR5A1 TYMS FOXG1 CARM1 GNA11 POLB NQO1 MME CCN2 ABAT TFRC SLC6A3 DNMT3A SIN3A AGT AMFR ADRB3 TGFBR2 DNMBP ALPL TIMP1 KRTAP4-5 APEX1 CDKN2B EDNRA SREBF1 TACR3 NFE2L2 CASP2 TP63 FOXO4 ADRA1A PPP1R9B ARG1 HTR2A CNR1 KRTAP4-8 SERP1 COX1 PT…	170	aging	Oxidative Stress Response and Cellular Homeostasis	The interacting proteins in this system primarily contribute to the regulation of oxidative stress response and maintenance of cellular homeostasis. Key proteins involved in these processes include GPX1, SOD1, SOD2, CAT, and COX1. 1. Oxidative stress response: GPX1, SOD1, and SOD2 are antioxidant enzymes that neutralize reactive oxygen species (ROS) and protect cells from oxidative damage. GPX1 r…	0.0941176	16	0.370702	3084	0.747503	poly-N-acetyllactosamine biosynthetic process	0.176156	10880	0.109219	cellular response to oxidative stress|response to oxidative stress|regulation of cellular response to oxidative stress|regulation of response to oxidative stress|cell redox homeostasis|cellular response to reactive oxygen species|negative regulation of cellular response to oxidative stress|cellular response to redox state|cellular response to hydrogen peroxide|positive regulation of response to o…	0.8851901|0.8637718|0.8463997|0.8231421|0.81842756|0.765292|0.74413896|0.7438342|0.74219656|0.7383882|0.73622656|0.73427236|0.73066807|0.72738284|0.7246916|0.7245166|0.7175224|0.7150829|0.7136704|0.70522267|0.69905454|0.698486|0.69479775|0.6924882|0.6911837|0.6898584|0.6888559|0.68780315|0.68732727|0.6840447|0.6840248|0.68390524|0.6830601|0.6790768|0.6774206|0.6766369|0.67364544|0.6717915|0.66938…	3.040543078906454e-17|2.2575276566548447e-30|1.5133238765599495e-06|3.6338207635377324e-06|2.933959335064975e-06|3.7085404183273186e-14|1.0|1.0|7.446572444322399e-10|0.0033613099130888192|4.6410968830864226e-07|5.664230356275604e-21|1.0|1.0|0.016517427808726344|4.172688462142024e-08|0.0003050223349532906|0.1215439892050025|0.01195038067723545|4.71695181809352e-06|1.0|1.8370704258990985e-06|7.4195…	9.185930751983245e-17|1.1459531252055049e-29|3.7273987107387917e-06|8.714198473711588e-06|7.620673597571363e-06|1.7659716277749138e-13|1.0|1.0|3.463522067126697e-09|0.007709426406167017|1.7382385329911693e-06|5.057348532388932e-20|1.0|1.0|0.037402588242423665|2.1074184152232443e-07|0.0009561828681921335|0.23019694925189868|0.02818486008781946|1.6726779496785535e-05|1.0|8.128630203093357e-06|4.524…	1	1
GO:0048568	FOXC2 FRZB ALX4 STRA6 MICAL2 ESRRB SETDB2 PBX3 RYR2 GGNBP2 HMX3 RBP4 TMIE CHRNA9 KMT2A PKD1 PAX2 TTC39C NOTO PDGFRA GSC PHLDA2 FOXG1 HOXB2 FLT3LG SOX11 EFEMP1 MFSD2A BIRC6 GATA4 HOXA2 GLI1 COMMD3-BMI1 PBX4 A2M PCDH12 HESX1 PLXNA4 MAFB CDK20 BPTF ID2 IFT140 SHOX2 PRDM1 USH1C PBX1 MKKS COL2A1 MYF5 LBX1 FZD6 PHACTR4 CEP290 TAF10 ERCC1 FUZ EOMES ASB2 ALDH1A2 ID3 TMED2 CCDC134 SOX9 SOX17 CDC40 E2F7 WN…	456	embryonic organ development	Wnt Signaling Pathway Regulation	The system of interacting proteins primarily involves the regulation of the Wnt signaling pathway. The Wnt signaling pathway is crucial for various cellular processes, including cell proliferation, differentiation, and migration. The proteins involved in this system contribute to the regulation of the Wnt signaling pathway through different mechanisms. 1. Wnt ligands and receptors: Several Wnt li…	0.0460526	21	0.282997	4444	0.636155	ATP synthesis coupled electron transport	0.233633	7179	0.412232	regulation of Wnt signaling pathway|regulation of non-canonical Wnt signaling pathway|regulation of canonical Wnt signaling pathway|Wnt signaling pathway|cell-cell signaling by wnt|positive regulation of Wnt signaling pathway|Wnt signaling pathway, calcium modulating pathway|regulation of Wnt protein secretion|regulation of Wnt signaling pathway, planar cell polarity pathway|negative regulation o…	0.9574188|0.8863983|0.875482|0.8585698|0.7891529|0.77754676|0.7761049|0.77558637|0.7647524|0.76431584|0.7536169|0.752173|0.74112666|0.72602546|0.7088474|0.70692647|0.6934403|0.67679185|0.6763771|0.65519166|0.65193695|0.6426625|0.6399481|0.6323375|0.63184905|0.62730527|0.62595373|0.62537414|0.62368494|0.6149368|0.60848796|0.6056066|0.5960812|0.59533525|0.5927305|0.59076077|0.58895695|0.58720845|0.…	3.557660712907666e-20|0.005334822327946091|8.145315285714443e-18|5.969166411969087e-32|7.927123864612773e-32|1.9119096345115736e-07|0.0066922140347812145|1.0|0.008086644625153407|2.9324459184183074e-13|2.432698446747503e-15|9.30120276196647e-29|0.0003521095602490478|0.06625060150771524|6.825797172145026e-07|1.0|2.0477844557349664e-05|2.3809448604658433e-09|5.656840396333452e-12|6.27840004670219e-…	1.1513465090316073e-19|0.007720437522353243|3.5725067042607204e-17|4.389092949977269e-31|6.551342036870061e-31|6.373032115038579e-07|0.01237008139515936|1.0|0.016639186471509068|1.638237943250451e-12|1.510992824066772e-14|1.0942591484666435e-27|0.0009673339567281533|0.13330100906984957|3.1341431453479576e-06|1.0|7.584386873092468e-05|1.417229083610621e-08|3.7216055239035874e-11|8.0492308291053715…	1	1
GO:0002440	RNF168 SUPT6H RIPK2 ARID5A SHLD1 LGALS4 SIRT1 IL4R STAT6 NLRP3 CCR2 ANGPT1 IL17F FOXP3 DHX36 HLA-DMB GAPT ATG5 RBP4 NR4A3 PGC TMBIM6 TICAM1 IL10 SPON2 TNFRSF14 CLEC7A SLC7A5 SMAD7 HLA-DQA1 MYD88 BTK PHB1 DNAJB9 NDFIP1 WNT5A PRG2 CD226 EXOSC6 TLR4 HPX P2RX7 FCGR2B MAD2L2 CARD9 SANBR POLB PRKDC HFE PYCARD APLF TFRC DENND1B VAMP3 BCL6 B2M TLR3 CLC IL1R1 MAPKAPK2 HSPD1 IFNA2 TRIM6 HLA-F AICDA HLA-DQB…	239	production of molecular mediator of immune response	Immune Response Regulation	The system of interacting proteins primarily performs the regulation of immune response. The proteins involved in this process are crucial for maintaining a balanced immune system, preventing excessive inflammation, and protecting the host from pathogens. 1. Inflammation regulation: Proteins such as IL1B, IL6, TNF, and IL18 are key cytokines involved in the initiation and regulation of inflammato…	0.1841	44	0.656509	47	0.996152	extracellular vesicle biogenesis	0.28598	6155	0.49607	regulation of immune response|regulation of immune system process|regulation of tolerance induction dependent upon immune response|immune response|regulation of adaptive immune response|regulation of immunoglobulin mediated immune response|regulation of inflammatory response to antigenic stimulus|negative regulation of immune response|tolerance induction dependent upon immune response|regulation …	0.9719341|0.8738882|0.8521298|0.8474562|0.83328724|0.826515|0.80373853|0.80076635|0.7768944|0.7730937|0.76899165|0.7522316|0.7469813|0.74372804|0.74073744|0.73589945|0.735741|0.73330474|0.7317555|0.72800374|0.7255094|0.71972114|0.7192346|0.7187544|0.7186443|0.71170175|0.70486116|0.7026454|0.69946605|0.69635475|0.69339466|0.691874|0.6830628|0.6804805|0.68034935|0.6784929|0.6778301|0.6768496|0.6758…	1.2345303734914643e-159|2.261613188085053e-198|0.04124188877660579|2.45165559119737e-207|1.1276889450138935e-139|5.852645960935064e-78|2.94117137232373e-10|1.950040673870603e-49|0.0027974255812179423|5.1631070693821494e-300|7.551645196553618e-135|1.2561902196168455e-33|2.4987541030156333e-52|3.4422370963895113e-209|2.6753877326875453e-06|6.596632842853762e-06|0.0002111857103871042|7.6783780430419…	2.1658427605113407e-158|7.06754121276579e-197|0.059598105168505486|1.225827795598685e-205|3.13246929170526e-138|9.289914223706451e-77|1.2004781111525428e-09|3.0953026569374655e-48|0.006148188090588884|6.453883836727686e-298|3.974550103449273e-133|1.7945574565954934e-32|4.899517849050262e-51|3.824707884877235e-207|1.1463018534452561e-05|2.566783207336094e-05|0.0006704308266257276|1.476611162123458…	1	1
GO:0002366	RNF168 SPI1 SUPT6H GRP SHLD1 KLRF2 PLCL2 CD1C RIPK2 IL4R STXBP1 STAT6 NLRP3 PTGER4 KARS1 CCR2 SOCS5 GATA2 GPR15LG IFNA5 LFNG RAC2 JUNB PTGDS FOXP3 RPS6 HLA-DMB GAPT IL23A GAB2 NR4A3 RARA ICAM1 ADORA2B IFNK FES TICAM1 MRGPRX2 CRACR2A GATA1 ITGB2 IL10 IFI35 SMAD7 PGLYRP3 MYD88 IFNA6 FCGR3A NDFIP1 CD46 BTK EXOSC6 TLR4 FCGR2B MAD2L2 STXBP3 IFNA1 SANBR IFNW1 IFNA10 PYCARD APLF CD180 TFRC LY9 LBP VAMP3…	295	leukocyte activation involved in immune response	Immune Response Regulation	The system of interacting proteins primarily performs the regulation of immune response. This is supported by the presence of proteins involved in various aspects of immune system function, including cytokine signaling, cell adhesion, and antigen presentation. 1. Cytokine signaling: Several proteins in the system are involved in cytokine signaling pathways, such as IL4R, IL6R, IL10, IL12B, IL18, …	0.118644	35	0.561377	157	0.987146	inhibition of cysteine-type endopeptidase activity	0.201491	10202	0.164729	regulation of immune response|regulation of immune system process|regulation of tolerance induction dependent upon immune response|immune response|regulation of adaptive immune response|regulation of immunoglobulin mediated immune response|regulation of inflammatory response to antigenic stimulus|negative regulation of immune response|tolerance induction dependent upon immune response|regulation …	0.9719341|0.8738882|0.8521298|0.8474562|0.83328724|0.826515|0.80373853|0.80076635|0.7768944|0.7730937|0.76899165|0.7522316|0.7469813|0.74372804|0.74073744|0.73589945|0.735741|0.73330474|0.7317555|0.72800374|0.7255094|0.71972114|0.7192346|0.7187544|0.7186443|0.71170175|0.70486116|0.7026454|0.69946605|0.69635475|0.69339466|0.691874|0.6830628|0.6804805|0.68034935|0.6784929|0.6778301|0.6768496|0.6758…	1.8100505387534344e-176|1.678484665350568e-172|0.0008751128117827277|2.3578412168036e-311|1.0211842971325855e-118|3.9412059912810005e-64|5.134416062845449e-12|1.127208712174961e-68|0.004228100920611497|3.721447672159362e-225|1.2850344023581246e-135|1.5756948649922573e-51|1.5601092941357925e-29|1.9569511729291457e-259|0.05073839173516788|0.004627102067090371|0.009806890051069824|1.784120084892278e…	3.770938622402988e-175|4.795670472430194e-171|0.001635724881836874|1.96486768066967e-309|2.320873402574058e-117|5.185797356948685e-63|2.4105239731668778e-11|2.8902787491665663e-67|0.009015140555674834|3.277562631819749e-223|7.139080013100693e-134|2.917953453689365e-50|2.0527753870207795e-28|2.7956445327559224e-257|0.10168014375785146|0.01155913644697658|0.023688140219975423|3.366264311117506e-44|…	1	1
GO:0060606	FOLR1 PLXNB2 SDC4 RARA KIF20B VANGL2 PAX2 MTHFR WNT5A ARHGAP35 FZD1 LRP2 PRICKLE1 LMO4 HECTD1 ABL1 DVL1 VASP CTHRC1 SEC24B COBL RARG CDK20 IFT57 TSC1 CECR2 NOG OPA1 FZD6 RALA TGFB1 MED12 TULP3 PRKACB DLC1 TGFB2 TRIM71 PHACTR4 KAT2A FUZ BCL10 FZD2 SKI TRAF6 TMED2 APAF1 CLUAP1 GRHL2 SCRIB SFRP1 NPHP3 LHX2 MKS1 BRD2 FZD3 SALL4 CASP3 CITED2 TEAD2 LIAS PRKACA SEMA4C GLMN BMP4 IFT172 PTCH1 CELSR1 MTHFD…	93	tube closure	Wnt Signaling Pathway Regulation	The primary biological process performed by this system of interacting proteins is the regulation of the Wnt signaling pathway. The Wnt signaling pathway is crucial for various cellular processes, including cell proliferation, differentiation, and migration. The proteins involved in this system interact to modulate the Wnt signaling pathway, ensuring proper cellular function and development. 1. W…	0.397849	37	0.181482	9879	0.191174	negative regulation of translation in response to stress	0.347718	1866	0.847224	regulation of Wnt signaling pathway|regulation of non-canonical Wnt signaling pathway|regulation of canonical Wnt signaling pathway|Wnt signaling pathway|cell-cell signaling by wnt|positive regulation of Wnt signaling pathway|Wnt signaling pathway, calcium modulating pathway|regulation of Wnt protein secretion|regulation of Wnt signaling pathway, planar cell polarity pathway|negative regulation o…	0.9574188|0.8863983|0.875482|0.8585698|0.7891529|0.77754676|0.7761049|0.77558637|0.7647524|0.76431584|0.7536169|0.752173|0.74112666|0.72602546|0.7088474|0.70692647|0.6934403|0.67679185|0.6763771|0.65519166|0.65193695|0.6426625|0.6399481|0.6323375|0.63184905|0.62730527|0.62595373|0.62537414|0.62368494|0.6149368|0.60848796|0.6056066|0.5960812|0.59533525|0.5927305|0.59076077|0.58895695|0.58720845|0.…	9.638760495012543e-14|5.841665472206205e-09|3.997221484641139e-12|1.1501952735688017e-22|1.3018337391763015e-22|9.18083094392558e-07|0.026832065043506954|1.0|1.7551631160314692e-08|1.5439963727307439e-09|1.881541732884315e-29|6.090093682959017e-18|0.00043048454275205393|8.220864118869304e-05|0.04258813162165093|0.00043048454275205393|0.0002537880465751909|0.08908351090339951|2.438337001422461e-09…	2.51664764882834e-13|1.3908727314776678e-08|1.3976298897346641e-11|6.572544420393153e-22|8.291934644435041e-22|2.799033824367555e-06|0.04467618255108505|1.0|7.193291459145365e-08|6.570197330769123e-09|2.0016401413662925e-28|4.684687448430013e-17|0.0011572165127743386|0.00027311840926476095|0.08709229370480763|0.0012774022040120295|0.0007980756181609776|0.17353689249957222|1.3698522479901467e-08|6…	1	1
GO:0061180	NTN1 GPX1 STAT6 PTCH1 CCND1 PYGO2 WNT2 PRLR MSX2 DDR1 HOXA5 ORAI1 ID2 MED1 RREB1 SCRIB NR3C1 EPHA2 RTN4 MGMT FOXB1 TNFSF11 ZNF703 BTRC LBH CSF1 GATA3 LRP5L IQGAP3 WNT3 ROBO1 CAV3 FGF2 CCL11 FGF10 CEBPB VDR JAK2 BRCA2 PML WNT4 AKT1 SMO MAPK1 BAX WNT5A ATP2C2 CSMD1 DEAF1 FGFR2 PGR TBX3 AKT2 ERBB4 FOXF1 ESR1 AREG CSF1R LATS1 SOSTDC1 LRP5 AR KDM5B SRC IRF6 PHB2 HIF1A WNT7B MSX1	69	mammary gland epithelium development	Wnt Signaling Pathway	The most prominent biological process performed by this system of interacting proteins is the Wnt signaling pathway. The Wnt signaling pathway is a crucial regulator of cell proliferation, differentiation, and migration, playing a significant role in embryonic development, tissue homeostasis, and cancer progression. Reasoning and Supporting Information: 1. Presence of multiple Wnt proteins: WNT2,…	0.362319	25	0.384539	1102	0.909776	type IV hypersensitivity	0.249806	6859	0.438431	Wnt signaling pathway|canonical Wnt signaling pathway|cell-cell signaling by wnt|non-canonical Wnt signaling pathway|Wnt signaling pathway, calcium modulating pathway|regulation of Wnt signaling pathway|positive regulation of Wnt signaling pathway|regulation of non-canonical Wnt signaling pathway|canonical Wnt signaling pathway involved in regulation of cell proliferation|Wnt signaling pathway, p…	0.9999999|0.9190836|0.90107286|0.8886236|0.82764864|0.8265207|0.8005681|0.76815945|0.7648002|0.7590256|0.7427521|0.7407475|0.7232201|0.7212118|0.720903|0.7202718|0.719818|0.7129217|0.7117807|0.68580085|0.6621746|0.6537244|0.65139467|0.6499417|0.64029896|0.63813245|0.636315|0.62625533|0.6254454|0.6213274|0.620403|0.6199087|0.60825986|0.60199237|0.59726644|0.5922562|0.5884378|0.5858413|0.58567303|0…	1.1296034037374269e-12|3.68084164045076e-14|1.2149764383394955e-12|0.03492206928494588|0.019963479626743403|5.719068360850503e-07|2.0915631932231138e-05|0.10323682365143942|0.023908784170196293|0.19269532117497806|0.06251092184695317|5.764135277293973e-07|0.00033087627954029523|1.0|0.04340172882512746|0.023908784170196293|1.0|0.0008161020821448497|0.02932576472075941|0.0057464756096997464|1.0|1.0…	2.8310862249058315e-12|1.1360622347070246e-13|4.308427086310268e-12|0.0524355394668857|0.032303365091817804|1.7984491700787743e-06|5.4467791490185254e-05|0.15980932453783192|0.044773004064038|0.32883160610064516|0.1059507149948359|2.2964682379657262e-06|0.000911504902314863|1.0|0.0883945597253105|0.05065420375041588|1.0|0.002414503201611981|0.06352166998632332|0.013363896766743596|1.0|1.0|1.0|0.0…	0.0160025	0.285758
GO:0050803	CDC20 NEDD4 APOE PTEN DTNBP1 NRCAM IGSF9 ITGB1 CBLN1 IL10RA BAIAP2 DAB2IP KIF1A PTPN13 KLK8 RHOA LRTM2 SLC17A8 SLITRK1 WASL RAP2A DHX36 C1QL2 CAMKV ARHGAP22 TPBG SLITRK5 EEF2K CBLN2 CRIPT C1QL1 LZTS1 ICAM5 IL10 FRMPD4 COLQ CAMK2B EPHA4 AKT1 ADGRL1 WNT5A FARP1 ZDHHC15 EPHB3 FCGR2B GPC6 FZD1 EPHB1 RPS6KA5 NECTIN1 PLXNC1 SETD5 MEF2C FYN NEDD9 ABL1 ABHD17C CDC42 SLC18A3 DVL1 ITPKA LRRN3 DBNL CLSTN3 L…	239	regulation of synapse structure or activity	Synaptic Function and Signaling	The system of interacting proteins primarily involves synaptic function and signaling. The proteins can be categorized into the following groups: 1. Synaptic proteins: NRXN1, NLGN1, NLGN2, NLGN3, SHANK2, and SYNGAP1 are involved in synapse formation and maintenance. These proteins contribute to the proper functioning of neuronal connections. 2. Cell adhesion and guidance molecules: NTN1, SLIT1, S…	0.179916	43	0.699248	21	0.998281	vascular associated smooth muscle cell differentiation	0.405269	1989	0.837154	synaptic signaling|trans-synaptic signaling|trans-synaptic signaling, modulating synaptic transmission|neuronal signal transduction|regulation of trans-synaptic signaling|neuron-neuron synaptic transmission|trans-synaptic signaling by trans-synaptic complex, modulating synaptic transmission|trans-synaptic signaling by trans-synaptic complex|postsynaptic signal transduction|signaling|signal releas…	0.943357|0.8555145|0.8276195|0.8090522|0.78623337|0.7698195|0.76660097|0.75634503|0.7487164|0.7410461|0.74100685|0.73874813|0.72880244|0.72060776|0.71879333|0.7184495|0.7149721|0.71163934|0.70300615|0.69965714|0.6992476|0.69915783|0.69482|0.69338346|0.69003445|0.68649065|0.68618923|0.6850508|0.68296635|0.6790124|0.6769484|0.67271495|0.6718161|0.6703695|0.67036295|0.6669314|0.6635116|0.66236633|0.…	2.673027691759344e-83|5.310847270223811e-82|0.0006899375644851026|0.09360791523954663|4.1676818229788936e-81|0.0027974255812179423|0.000575208362519543|7.408998084235469e-13|0.0016947447869202425|3.0299777669745502e-25|9.821839690613148e-09|1.0|0.008088996969840764|1.171618697169986e-09|0.0807897076468482|0.0|2.6753877326875453e-06|2.6495781185967216e-08|3.1554481652367303e-77|2.9917356388890906e…	2.4300251743266762e-82|6.104422149682542e-81|0.0013141667894954335|0.13184213414020654|6.832265283571957e-80|0.005815853599205702|0.0012504529619990065|3.6860686986246114e-12|0.0038516926975460056|2.80553496942088e-24|4.2153818414648703e-08|1.0|0.01747083578799301|6.299025253602075e-09|0.1565692008659849|0.0|1.0701550930750181e-05|1.3799886034357926e-07|1.1686845056432336e-75|3.287621581196803e-2…	0.334647	1
GO:1903556	DICER1 IL27RA CIDEA ERRFI1 TNFAIP3 TSPO LILRB1 ADIPOQ LTF GHRL ARRB2 BCL3 CD33 HAVCR2 ELF4 FOXP3 IGF1 IL37 GAS6 GHSR GPR18 NOD2 TREM2 RARA PTPN22 AKAP8 C5AR2 AXL LILRA4 BPI CX3CL1 ZC3H12A POMC IL10 CLEC4A CD34 TRIM27 NFKBIL1 NLRC3 TWIST1 TLR4 PTPN6 ARG2 CD274 SLAMF1 GPNMB LILRB4 IL4 ILRUN NR1H4 DEFB114 SYT11 LGALS9 IRAK3 GSTP1 CACTIN LBP VSIR CHRNA7 ACP5 ORM1 SELENOS SIRPA MC1R	64	negative regulation of tumor necrosis factor superfamily cytokine production	Immune Regulation and Inflammation	The primary biological process performed by this system of interacting proteins is immune regulation and inflammation. The proteins involved in this process play crucial roles in modulating immune responses, regulating inflammatory pathways, and maintaining homeostasis. 1. Immune cell signaling and activation: Several proteins, such as IL27RA, IL10, IL4, IL37, and FOXP3, are involved in immune ce…	0.40625	26	0.326954	3021	0.752661	DNA recombination	0.387879	1147	0.906091	regulation of immune response|regulation of immune system process|inflammatory response|regulation of inflammatory response|regulation of inflammatory response to antigenic stimulus|immune response|immune system process|inflammatory response to antigenic stimulus|regulation of innate immune response|innate immune response|positive regulation of immune response|neuroinflammatory response|regulatio…	0.8279091|0.81583226|0.7987854|0.7882872|0.7850624|0.77857304|0.7777616|0.7587662|0.75162375|0.7421552|0.73499024|0.72957295|0.7226835|0.71882224|0.71786463|0.71625423|0.71606237|0.7139514|0.71053684|0.71024674|0.70533884|0.70388144|0.6999049|0.6987095|0.6914674|0.690626|0.68772286|0.6825387|0.68136436|0.67854655|0.6745006|0.67222244|0.6718352|0.67072546|0.6690049|0.66416377|0.66164756|0.660009|0…	9.927081906099553e-27|6.338053997872171e-36|1.1385439876461018e-24|2.0440201146241748e-22|1.9532629085328902e-05|6.853321368888508e-33|1.832000592038179e-36|7.636584256186291e-06|8.639144541968982e-16|5.992173261053192e-23|6.896381924001514e-22|5.376297148696898e-06|3.920164973880166e-16|2.1639112060816835e-17|3.3829079825599862e-09|0.0004441121275109311|4.961074402515204e-08|2.4797649554276143e-…	3.731985678984794e-26|3.6425597688920526e-35|6.432451907605096e-24|1.148325907092233e-21|4.6285850913101666e-05|5.231543029685884e-32|1.888660404163071e-35|2.1451079371309806e-05|5.573641639979989e-15|5.1656666043562e-22|5.606814572358955e-21|1.8930623763017248e-05|2.722336787416782e-15|1.7311289648653468e-16|1.8898927276871432e-08|0.0013139412056536422|2.468196220156818e-07|2.1944822614403666e-1…	0.0331234	0.517553
GO:1904888	FOXC2 BMP4 GLI3 HOXA2 FOXE1 TGFBR2 MSX2 TBX1 ALX3 MMP14 MMP16 WDR19 IFT140 MTHFD1L INSIG2 SLC39A3 GRHL2 NEUROG1 ZIC3 TGFBR1 EDNRA LHX1 NOG TP63 WNT9B CTNNB1 TMEM107 SMAD2 IRX5 HOXA1 FOXN3 SLC39A1 PAX5 RIC1 SIX1 SIX2 NODAL RUNX2 RDH10 CPLANE2 PDGFRA MTHFD1 MEGF8 DLX2 TFAP2A EXT1 SIX4 INSIG1 MED12 CEP55 TULP3 TWIST1 TBX15 GNA11 COLEC10 EIF4A3 TGFB2 SMAD3 TIFAB FGF8 CRKL FREM1 SETD2 RAB23 TGFB3 FGF4…	73	cranial skeletal system development	Craniofacial Development and Signaling Pathways	1. Craniofacial development: FOXC2, BMP4, GLI3, HOXA2, FOXE1, MSX2, TBX1, ALX3, and DLX2 are involved in craniofacial development. These proteins play roles in the regulation of gene expression, cell differentiation, and morphogenesis, contributing to the formation of facial structures. 2. Bone morphogenetic protein (BMP) signaling: BMP4, TGFBR2, TGFBR1, SMAD2, and SMAD3 are components of the BMP…	0.589041	43	0.625229	9	0.999263	axis specification	0.473352	598	0.95104	craniofacial suture morphogenesis|face morphogenesis|face development|facial nucleus development|embryonic cranial skeleton morphogenesis|forebrain morphogenesis|regulation of fibroblast growth factor receptor signaling pathway involved in neural plate anterior/posterior pattern formation|SREBP signaling pathway|cranial skeletal system development|facial nerve morphogenesis|forebrain development|…	0.7065115|0.7040888|0.6748173|0.6579526|0.6362485|0.6322608|0.63159126|0.62731177|0.62522864|0.6246157|0.62036544|0.6125992|0.6045812|0.603622|0.6032847|0.5996554|0.59654707|0.5952732|0.59477514|0.594391|0.5932488|0.5890075|0.5880178|0.58724105|0.5871546|0.5867414|0.5842244|0.58317184|0.58158743|0.5799111|0.5792379|0.57659876|0.5747738|0.574666|0.5704541|0.5702034|0.5698083|0.56962204|0.56874263|…	2.1679044298309404e-44|1.597071787618184e-07|4.004002652102927e-11|1.0|7.400344038370345e-118|0.05397761791900669|0.008497720643520909|0.0018113954385999196|4.216431653163132e-204|0.04178216418184142|9.199411972423231e-10|7.405889581865262e-08|7.271063438657001e-20|1.935954635097899e-17|0.016924210930823816|1.0|5.0348813035808234e-11|4.141952533678837e-07|0.0003703605530733506|6.058432442585405e-…	1.2111197932016428e-43|3.487056304843196e-07|1.3214530204960154e-10|1.0|1.608770443123988e-116|0.08819872208988021|0.015394421455653819|0.0037737404970831657|4.684924059070147e-202|0.07780663721013299|4.359910887404376e-09|3.192193785286751e-07|6.322663859701739e-19|1.586848061555655e-16|0.037946661279874026|1.0|3.051443214291408e-10|1.8741866668230032e-06|0.001161004868568497|6.445140896367452e-…	9.67761e-12	1.93552e-09
GO:0060249	STRAP GAA ABCC8 PFKM HOXA13 P2RY1 ESRRB ANGPT1 LSR CHMP4B XIAP CA7 DEF8 SPATA7 RBP4 KMT2A MC4R SLC2A1 LIPA CAPN3 OCLN P2RX7 CCN2 GCNT2 TJP1 MFSD2A TNFRSF11A BBS1 GPR55 LAMC1 LCN1 USH1C TSPOAP1 MKKS COL2A1 FXN TJP2 STK39 RAC3 ILDR1 SERPINA3 CDH5 IL6 INAVA SH3GL2 NPY NELL2 CRACD SOX9 CLDN12 TJP3 P2RY4 VSIG1 NXNL1 INPP5D USH2A TNFSF11 FH MKS1 CRB2 IL20RA DCSTAMP BARD1 FGGY ZNF675 PIGR LPCAT1 TMEM175…	351	anatomical structure homeostasis	Intracellular Signaling and Transport	The system of interacting proteins primarily performs intracellular signaling and transport processes. The proteins involved in these processes are crucial for maintaining cellular homeostasis and regulating various cellular functions. 1. Intracellular signaling: Several proteins in the system are involved in signal transduction pathways, which are essential for cellular communication and respons…	0.0911681	32	0.394647	3248	0.734076	protein localization to site of double-strand break	0.44393	1606	0.868512	intracellular signal transduction|intracellular transport|intracellular receptor signaling pathway|signaling|signal transduction|intracellular protein transmembrane transport|regulation of intracellular signal transduction|intercellular transport|intracellular protein transport|cell-cell signaling|regulation of intracellular transport|regulation of signaling|regulation of signal transduction|seco…	0.8510248|0.8118117|0.7945883|0.7892448|0.7844831|0.7814461|0.7706393|0.76553774|0.7596179|0.7544254|0.7371428|0.724916|0.7155644|0.7065476|0.7034427|0.7015333|0.6976546|0.69644964|0.6949729|0.691|0.6902169|0.6857469|0.6795419|0.67844355|0.6729456|0.670038|0.6666327|0.66579854|0.662465|0.6579038|0.655736|0.655285|0.65307295|0.65162003|0.65123224|0.651051|0.64888656|0.648486|0.6482121|0.6473561|0.…	5.477537355710908e-16|0.0003454196520309716|0.009152018355932722|3.59557621618688e-23|7.47227344289082e-16|1.0|4.1775900004473876e-15|0.18690224637619368|0.011091628248058719|9.43791802029312e-26|0.00016552258721271176|1.189667578767355e-25|3.753293743277685e-17|7.233856528148958e-05|0.2035580567944893|6.301342225071458e-14|0.00010187454703221943|1.805989506905836e-15|1.7945293503808308e-17|5.626…	1.5650106730602595e-15|0.0005662617246409371|0.014550108673978891|2.1026761498168885e-22|3.68092287827134e-15|1.0|2.3080607737278385e-14|0.2836149413902787|0.02196362029318558|8.903696245559548e-25|0.0004510152240128386|1.2522816618603738e-24|2.8220253708854777e-16|0.00024193500094143674|0.3721353871928506|5.081727600864079e-13|0.0003475530988096525|1.5049912557548633e-14|1.6771302340007764e-16|2…	1	1
GO:0071621	CCL23 PPBP CD300H CCL18 RAC2 CXCL6 CXCR1 CCL15 PLA2G1B IL23A EDN1 CCL7 VAV1 ITGB2 CXCR2 CCL4L1 DAPK2 TNFAIP6 S100A14 CCL2 CCL14 CCL24 CCL13 CXCL1 LBP CXCL3 DPP4 C3AR1 CCL16 S100A9 XCL2 BST1 MPP1 CCL4L2 ITGA9 IL34 CSF3R MCU EDN2 S100A7 CCL19 GBF1 CCL3 CCL11 C1QBP RAC1 BSG PF4 CCL1 SLAMF1 TGFB2 CCL8 FCER1G CSF1R CXCL10 CXCL13 VAV3 CCL17 CKLF CMKLR1 PTK2 SCG2 SRP54 CXADR CXCL11 SLIT2 CD74 MAPK3 MOSP…	130	granulocyte chemotaxis	Chemotaxis and Inflammation Regulation	The primary biological process performed by this system of interacting proteins is the regulation of chemotaxis and inflammation. Chemotaxis is the movement of cells in response to chemical gradients, while inflammation is the immune system's response to infection or injury. 1. Chemokine involvement: A significant number of proteins in this system are chemokines (CCL23, CCL18, CXCL6, CCL15, CCL7,…	0.576923	75	0.708233	21	0.998281	female gonad development	0.267055	9974	0.183396	chemotaxis|leukocyte chemotaxis involved in inflammatory response|regulation of chemotaxis|regulation of leukocyte chemotaxis|cell chemotaxis|leukocyte chemotaxis|regulation of neutrophil chemotaxis|regulation of monocyte chemotaxis|regulation of granulocyte chemotaxis|positive chemotaxis|cellular response to chemokine|monocyte chemotaxis|regulation of inflammatory response|regulation of chronic …	0.81406486|0.8085606|0.7987259|0.78162044|0.76703626|0.76526654|0.7592562|0.7466417|0.74021244|0.7338897|0.73292875|0.7326039|0.72855765|0.7239262|0.72360814|0.7194996|0.7176572|0.7172909|0.71489954|0.7122022|0.7082325|0.7070151|0.70644665|0.7058897|0.70378524|0.6988142|0.696122|0.6932545|0.6920345|0.6894075|0.6857822|0.683899|0.6773286|0.6770595|0.67687774|0.67665434|0.6744205|0.6735426|0.672805…	3.6027900525093434e-194|2.3200802926513036e-05|7.017330958407047e-88|2.0879957453525054e-103|1.597701926652835e-239|3.3128824476568805e-260|1.301357672783827e-72|5.514050939220325e-13|4.122448335927789e-116|1.2132013330661166e-09|3.137538080344308e-80|2.2953629134612593e-65|5.3349101861800666e-18|0.002467139981864812|2.171282040276641e-17|8.616114797675056e-35|2.9384654885628264e-54|1.76069161980…	1.0293685864312408e-192|4.187870564352533e-05|1.0632319633950071e-86|3.796355900640919e-102|1.1412156618948821e-237|3.01171131605171e-258|2.6558319852731163e-71|2.7990106290458504e-12|1.96307063615609e-114|5.206872674103504e-09|9.507691152558509e-79|5.885545931951947e-64|4.167898582953177e-17|0.006526825348848709|1.8880713393709922e-16|1.723222959535011e-33|7.534526893750836e-53|9.415463207527856…	0.189308	1
GO:0050658	SUPT6H NXF2 HNRNPA1L2 SENP2 FLOT1 IWS1 PABPN1 POM121 NXT1 MAGOHB UPF1 NXF2B NUP37 ATXN2 ALYREF NXF5 NPIPA1 NUP160 FYTTD1 POM121L12 SRSF7 NUP98 PHAX EIF4A3 NOL6 CKAP5 AAAS PARP11 TPR SEM1 AGFG1 EIF5A2 EIF5AL1 NUP153 SNUPN XPO1 KHDRBS1 PNPT1 NUP205 NXT2 IGF2BP2 DHX9 THOC6 BICD2 TGFBR2 SIDT1 NUTF2 THOC3 DDX19B XPOT HSF1 ARC NUP43 RFTN1 YTHDC1 TSC1 HNRNPA1 NUP155 UPF3B ZC3H11A NPAP1 MAGOH KHSRP UPF3A…	161	RNA transport	mRNA Export and Quality Control	The primary biological process performed by this system of interacting proteins is mRNA export and quality control. The proteins involved in this process are responsible for the proper transport of mRNA from the nucleus to the cytoplasm and ensuring the integrity of the mRNA molecules. 1. mRNA export machinery: The key proteins involved in mRNA export include NXF1, NXT1, NUP98, NUP153, NUP214, NU…	0.341615	55	0.580845	96	0.99214	intercellular transport	0.43426	935	0.923449	mRNA export from nucleus|regulation of mRNA export from nucleus|nuclear mRNA surveillance|RNA export from nucleus|ncRNA export from nucleus|regulation of RNA export from nucleus|mRNA processing|poly(A)+ mRNA export from nucleus|viral mRNA export from host cell nucleus|regulation of nuclear-transcribed mRNA catabolic process, nonsense-mediated decay|rRNA export from nucleus|RNA 5'-end processing|m…	0.7452432|0.7320267|0.72984076|0.72542524|0.72023416|0.7169312|0.7035824|0.7034403|0.6872697|0.6832192|0.6795244|0.66995186|0.6698074|0.66685414|0.66566324|0.66421336|0.6631613|0.6630473|0.6629339|0.66212225|0.6610481|0.6572104|0.6555352|0.65373886|0.6527304|0.65008533|0.6499051|0.64915663|0.6431197|0.6424277|0.6412441|0.6403048|0.6390313|0.63778245|0.63370883|0.6309805|0.62888634|0.6255064|0.623…	8.983881955295655e-146|6.245675047405297e-13|1.0|2.261599659081768e-194|4.531508726484124e-19|3.1010037407186533e-25|2.924646282031915e-36|5.651051041098051e-46|5.0755859504791825e-17|1.014955668998477e-09|8.763875739607701e-05|0.01948361455090245|1.425807582690839e-10|1.1531799866715518e-23|8.763875739607701e-05|1.0|1.0|0.008740590260784368|1.0|8.763875739607701e-05|1.0|1.0|3.260111733703942e-28…	1.4973136592159428e-144|1.8533160378057258e-12|1.0|1.0279998450371672e-192|2.5747208673205253e-18|2.0267998305350675e-24|2.954188163668601e-35|8.310369178085368e-45|3.452779558149104e-16|4.4128507347759864e-09|0.000251835509758842|0.041720802036193674|6.955158939955312e-10|1.188845347084074e-22|0.00029507999123258257|1.0|1.0|0.021163656805773288|1.0|0.00026800843240390524|1.0|1.0|4.28962070224202…	0.00375331	0.0970741
GO:0009206	ALDOA NDUFC2 NDUFB1 COX2 NDUFA13 ATP5PO NDUFB10 NDUFS1 NDUFA5 ATP5PD NDUFS5 ND1 ND2 ND3 ND4 IMPDH1 SLC25A12 SDHB FLCN NME6 NDUFS2 ATP5PB NDUFA2 ATP5MGL NDUFS4 NDUFA10 ANTKMT NDUFS3 NDUFB6 NME4 NME2 ATP5MC1 ATP5PF ATP5MK ATP5F1B DGUOK TAFAZZIN ATP8 NME3 NDUFS8 NDUFA11 PRKAG2 ND5 TGFB1 ATP5ME NME1-NME2 SDHC NDUFV1 PPARGC1A NDUFC1 ND6 NME7 ATP5F1D NDUFAB1 ATP5F1E TMSB4X ATP5MG NME5 NUDT2 NDUFB9 PID1…	113	purine ribonucleoside triphosphate biosynthetic process	Oxidative Phosphorylation	The most prominent biological process performed by this system of interacting proteins is oxidative phosphorylation. Oxidative phosphorylation is the primary process through which cells generate ATP, the primary energy currency of the cell, through the electron transport chain (ETC) and ATP synthase. Reasoning and Supporting Information: 1. Presence of ETC Complexes: The system includes proteins …	0.265487	30	0.296344	5537	0.546668	snRNA modification	0.26309	7470	0.388407	oxidative phosphorylation|regulation of oxidative phosphorylation|positive regulation of oxidative phosphorylation|negative regulation of oxidative phosphorylation|aerobic respiration|cellular respiration|pentose-phosphate shunt, oxidative branch|aerobic electron transport chain|oxygen metabolic process|glycolytic process|phosphorylation|electron transport chain|respiratory electron transport cha…	0.99999976|0.80342305|0.8013146|0.7272001|0.7227429|0.72211516|0.71065676|0.6911854|0.6779686|0.6695447|0.6656251|0.66295|0.66080403|0.6484431|0.6419567|0.6418315|0.63553|0.623307|0.622246|0.6209703|0.6161108|0.61291707|0.61182576|0.61068976|0.6092347|0.6073371|0.60526776|0.60116494|0.5992749|0.5964777|0.593246|0.5912342|0.58987683|0.5876401|0.58748806|0.58533204|0.5853045|0.58516705|0.5846319|0.…	7.74517624512334e-132|0.0003400247170290134|0.01313862832008608|1.0|6.618731492272056e-120|4.0942089131259886e-123|1.0|3.490830750990577e-82|1.0|1.9193451197806945e-05|0.0002813698226770584|9.65110320799928e-78|3.854104061388795e-88|1.0|0.035372765328885995|1.0|4.981003326571291e-87|0.10043952626396274|1.0|4.355187419388199e-27|3.4450764606965998e-155|0.02610614081566058|2.1490864381796646e-141|0…	1.069759807552322e-130|0.000558332868684751|0.020593461316749342|1.0|1.5392398819237342e-118|1.049797157211792e-121|1.0|1.2037347417208886e-80|1.0|5.7465422747924984e-05|0.0007424005875384126|2.8385597670586115e-76|1.376465736210284e-86|1.0|0.07462608719174262|1.0|1.778929759489747e-85|0.19352509877449467|1.0|5.184746927843094e-26|1.8131981372087368e-153|0.06043088151773283|1.9537149437996953e-13…	1	1
GO:0002833	USP17L2 TASL FCN3 XIAP HSP90AA1 NLRP1 CLPB IFNK LILRA4 STAT5B TICAM2 MYD88 DDX60 PHB1 S100A14 COLEC10 HCK TLR10 TRIM15 PELI1 HLA-F DHX9 KLRC4 ZDHHC5 RTN4 SH2D1B NOD1 C1QBP TLR7 LYN KLRK1 NFKBIL1 ERBIN IRF4 DDX3X TRAF3 PAK1 BCL10 HMGB1 INAVA LAG3 PRKCE KLK5 IL12B POLR3F NINJ1 PQBP1 SLC15A3 RBM14 HLA-E POLR3B TNIP3 FADD ZCCHC3 POLR3C CD300A TRIL MEFV GRN TRIM41 HSPA1B HLA-DRB3 HEXIM1 HRG PRKCA GPR1…	322	positive regulation of response to biotic stimulus	Innate Immune Response Regulation	The system of interacting proteins primarily performs the regulation of innate immune response. The innate immune response is the body's first line of defense against pathogens and is crucial for maintaining homeostasis. 1. Pattern recognition receptors (PRRs) play a key role in detecting pathogens and initiating the immune response. In this system, several PRRs are present, including TLR1, TLR2,…	0.118012	38	0.488318	372	0.969543	cellular biogenic amine catabolic process	0.271113	6874	0.437203	regulation of innate immune response|innate immune response|regulation of immune response|negative regulation of innate immune response|regulation of inflammatory response to antigenic stimulus|positive regulation of innate immune response|activation of innate immune response|regulation of inflammatory response|innate immune response in mucosa|regulation of adaptive immune response|regulation of …	0.9682305|0.88275456|0.81524205|0.7865389|0.78506196|0.7826243|0.7815716|0.76508933|0.76416993|0.756582|0.7516737|0.74798954|0.74436337|0.7416499|0.7341793|0.7236454|0.71902686|0.7173836|0.70638555|0.7034359|0.7022983|0.69957757|0.69596213|0.6909479|0.685802|0.6834512|0.6820452|0.67897844|0.6787253|0.67499244|0.6732081|0.6730263|0.6719334|0.6694083|0.6685244|0.6642674|0.6607605|0.6579617|0.656933…	0.0|0.0|0.0|2.0980626769791945e-26|6.265951960789358e-13|0.0|0.0|5.967026429391166e-50|0.016713931824660876|5.351778155405702e-35|0.03142399789236173|1.7372980879042837e-13|0.0|0.0008691725237486808|0.0|0.00023512931614326856|2.5137012506133385e-07|0.0013494205143155412|0.0004029506820762996|4.1477214821676e-77|0.0010418233656967534|8.763278531531706e-297|1.0|3.3136058805124565e-13|0.0|1.81638388…	0.0|0.0|0.0|1.3623783616748017e-25|2.7848675381286038e-12|0.0|0.0|9.624236176437365e-49|0.0320804833486773|6.296209594594942e-34|0.05611428195064594|1.0876911873995168e-12|0.0|0.002455289615109268|0.0|0.0007302152675256788|1.1311474561811044e-06|0.003922734053242853|0.001251399633777328|1.3379746716669677e-75|0.002923093232557437|8.763278531531706e-294|1.0|2.529470137795768e-12|0.0|3.948660617563…	1	1
GO:0072593	NDUFC2 MMP3 BECN1 CYBA GPX1 ABCD2 CCN1 NDUFA13 COX2 RHOA DRD5 SOD1 FOXM1 RAC2 PRDX2 NDUFS1 NOS3 STK17A BRCA1 EDN1 FOXO3 ATG5 FBLN5 PLIN5 IMMP2L CLCN3 PAX2 VAV1 ITGB2 CLEC7A ND2 DHFR FANCC PAGE4 PXDN RFK RIPK3 TLR4 P2RX7 TUSC2 CBR1 RIPK1 PDGFB NOX4 ACOX1 PRG3 NQO1 PLA2R1 CCN2 DUOXA2 FYN VDAC1 PARL HIF1A CTNS SLC25A33 MMP8 NDUFS4 AGT IL19 FPR2 BMP7 NDUFS3 LRRK2 TGFBR2 BST1 EIF6 CBS SLC30A10 DUOXA1 …	224	reactive oxygen species metabolic process	Oxidative Stress Regulation and Mitochondrial Function	The interacting proteins in this system are primarily involved in the regulation of oxidative stress and mitochondrial function. Key proteins include NDUFC2, NDUFA13, NDUFS1, NDUFS4, NDUFS3, and ND2, which are subunits of the mitochondrial respiratory chain complex I. This complex plays a crucial role in oxidative phosphorylation and ATP production. Additionally, COX2 is a subunit of the mitochon…	0.169643	38	0.706446	8	0.999345	negative regulation of biomineral tissue development	0.190629	10522	0.13853	regulation of response to oxidative stress|response to oxidative stress|cellular response to oxidative stress|regulation of cellular response to oxidative stress|regulation of mRNA stability involved in response to oxidative stress|regulation of reactive oxygen species metabolic process|regulation of oxidative stress-induced cell death|reactive oxygen species metabolic process|detection of oxidat…	0.7683685|0.7578417|0.750432|0.74970967|0.72831553|0.7118505|0.708125|0.70644623|0.69271755|0.6883801|0.6880022|0.6836901|0.6818165|0.6808464|0.67773443|0.67285526|0.67187643|0.6689143|0.66365266|0.66126454|0.658987|0.65766454|0.65595955|0.6548852|0.65420616|0.6535742|0.65177226|0.650288|0.64936674|0.6481215|0.64576244|0.64537275|0.64427173|0.6388794|0.6372602|0.6360689|0.6347468|0.63369703|0.633…	3.06963074456481e-34|6.340540991937503e-78|1.651701417412107e-64|1.1597660520236707e-32|1.0|4.959910842810936e-289|3.2688840193122325e-23|0.0|0.025960124093180704|0.0002892225032444859|1.0|1.0|4.1661808546922414e-14|5.450287296507671e-16|2.898069426910167e-20|1.0|5.888623678563014e-09|0.00017440899161267934|2.5576474393919757e-14|3.395287816393144e-06|1.1498307824823558e-25|0.6278337456084421|2.2…	1.4277352300301443e-33|6.891892382540764e-77|2.0907612878634266e-63|8.720045503937373e-32|1.0|4.959910842810936e-287|2.457807533317468e-22|0.0|0.048163495534658075|0.0007692087852246965|1.0|1.0|2.4947190746660127e-13|3.949483548193964e-15|2.7340277612360066e-19|1.0|3.1156739040015946e-08|0.0005718327593858339|1.9524026254900577e-13|1.2482675795563029e-05|1.2919446994183773e-24|1.0|7.1260193683721…	0.00052126	0.0226635
GO:0019218	PRKAA1 APOE SIRT1 SOD1 NFKB1 POR SEC14L2 ASAH1 ABCB11 CES1 ERLIN1 NR1D1 STAT5B DDX20 SCAP ARMC5 UGT1A8 WNT4 SF1 STARD4 NR5A1 ARV1 CGA NR1H4 EPHX2 DGKQ PROX1 RORA SNAI1 LPCAT3 FSHB CLCN2 NR0B1 MBTPS2 ACADVL KIT CYP27B1 NR3C1 SERPINA12 SREBF1 GNB3 DGAT2 PANK2 ABCG4 LEP MALRD1 PDE8B DKK3 ABCG1 MBTPS1 INSIG1 FMO5 RORC IFNG AKR1C3 BMP2 H6PD DAB2 SNAI2 DHH TSPO UGT1A1 FGF1 FGF19 INSIG2 TTC39B IL1A FGFR…	92	regulation of steroid metabolic process	Cholesterol Homeostasis and Inflammation Regulation	The interacting proteins PRKAA1, APOE, SIRT1, SOD1, NFKB1, POR, SEC14L2, ASAH1, ABCB11, CES1, ERLIN1, NR1D1, STAT5B, DDX20, SCAP, ARMC5, UGT1A8, WNT4, SF1, STARD4, NR5A1, ARV1, CGA, NR1H4, EPHX2, DGKQ, PROX1, RORA, SNAI1, LPCAT3, FSHB, CLCN2, NR0B1, MBTPS2, ACADVL, KIT, CYP27B1, NR3C1, SERPINA12, SREBF1, GNB3, DGAT2, PANK2, ABCG4, LEP, MALRD1, PDE8B, DKK3, ABCG1, MBTPS1, INSIG1, FMO5, RORC, IFNG,…	1	92	0.538088	71	0.994187	cerebellar cortex development	0.351547	2424	0.801539	cholesterol homeostasis|sterol homeostasis|cellular response to cholesterol|regulation of cholesterol metabolic process|regulation of intracellular cholesterol transport|response to cholesterol|cholesterol metabolic process|regulation of cholesterol transport|regulation of cholesterol storage|regulation of cholesterol biosynthetic process|regulation of cholesterol import|regulation of intestinal …	0.8277832|0.7706835|0.7273398|0.72723866|0.7268211|0.7250867|0.70970786|0.7069023|0.70410776|0.69849575|0.67757416|0.67703164|0.67638934|0.67357796|0.66817415|0.66690373|0.6651555|0.661901|0.6598011|0.65333074|0.6511721|0.65001464|0.64903337|0.6481362|0.63587433|0.633399|0.62709725|0.62472093|0.6210554|0.61849177|0.6083901|0.60489315|0.6025511|0.60125804|0.60101277|0.59675723|0.59662366|0.5965534…	9.822906564301569e-32|1.3096011458775392e-31|0.002857729951158829|2.0290425678924276e-83|8.212111214512985e-06|0.00031569704792857456|3.119696935690771e-59|2.2517106859765953e-19|1.7515488408261993e-06|1.0003847760509477e-44|1.0|1.746076269957015e-05|0.052396024196055956|7.38248203581532e-10|1.869958683423745e-10|2.2517106859765953e-19|8.212111214512985e-06|3.4235464723854543e-57|4.11534964019131…	4.16224854419558e-31|6.929106591944652e-31|0.004935630312882262|3.1216039506037344e-82|2.027681781361231e-05|0.0007410728824614426|5.1994948928179514e-58|1.608364775697568e-18|5.724015819693462e-06|1.4931116060461905e-43|1.0|5.7817095031689236e-05|0.09631622094863226|4.034143188970121e-09|1.1402187094047224e-09|2.501900762196217e-18|3.220435770397249e-05|7.442492331272727e-56|2.110435712918621e-0…	0.0317497	0.512092
GO:0035924	HRG ITGB1BP1 FOXC1 VEGFC PGF MAPK14 CCBE1 IL12B DAB2IP PTP4A3 DLL4 FLT4 MAP2K3 IL12A JCAD ADAMTS12 XDH PIK3CB VEGFD RELA PRKD2 SMOC2 ADGRA2 ROBO1 FLT1 GAS1 VCAM1 VEGFB ANXA1 CD63 KDR TNXB PIK3CA PDGFRB PDGFRA AKT1 NRP2 MT1G NOTCH1 RAMP2 PIK3CD VEGFA TSPAN12 NUS1 PRKD1 SEMA6A DCN MYO1C GAB1 SPRY2 NR4A1 HSPB1 ERN1 CADM4 MAPKAPK2 DLL1 EGR3 ATP2B4 NRP1 FLT3 ADAMTS3 SPHK1	62	cellular response to vascular endothelial growth factor stimulus	Angiogenesis Regulation	The system of interacting proteins primarily performs the regulation of angiogenesis, the formation of new blood vessels from pre-existing ones. This process is crucial for various physiological and pathological conditions, such as wound healing, tumor growth, and inflammation. 1. VEGF family proteins (VEGFA, VEGFB, VEGFC, VEGFD, and PGF) are key regulators of angiogenesis. They bind to their res…	0.951613	59	0.616633	44	0.996398	vein smooth muscle contraction	0.380365	2229	0.817505	regulation of angiogenesis|regulation of sprouting angiogenesis|angiogenesis|regulation of vasculogenesis|regulation of blood vessel remodeling|regulation of vasculature development|regulation of vascular wound healing|blood vessel remodeling|positive regulation of angiogenesis|regulation of blood vessel endothelial cell proliferation involved in sprouting angiogenesis|angiogenesis involved in wo…	0.96088314|0.8653412|0.8207574|0.81031954|0.77617645|0.7640965|0.7502924|0.7491588|0.7473809|0.7420914|0.7084826|0.704408|0.7036404|0.70229065|0.6942389|0.694046|0.6861436|0.6823939|0.68052727|0.6780722|0.6731369|0.67313147|0.6729592|0.6713199|0.667112|0.661926|0.66128933|0.6499671|0.648685|0.6456952|0.643984|0.6436535|0.64355624|0.64184535|0.6409081|0.63951993|0.6322609|0.630236|0.6253995|0.6234…	1.34411105648913e-35|2.747897026377668e-07|4.6318633877221334e-57|2.4386110927425885e-05|0.0002670675068466423|2.0442842252506134e-35|0.03558851023908083|1.7211678703004898e-05|3.93698714432683e-24|3.139124769259901e-09|2.5559214247679994e-06|0.017952854367882697|0.0006936022154188614|1.0|2.6287588386437043e-09|1.0|0.08664695822418648|0.007219562440028696|4.862780322923268e-29|1.0|6.6034234811910…	6.524810953830729e-35|5.896774734716026e-07|4.927514242257589e-56|5.407119939562281e-05|0.0005587186335703814|1.6224477978179472e-34|0.05777355558292342|4.6020531291456945e-05|3.4840594197582565e-23|1.3079686538582921e-08|8.783235136659793e-06|0.03852543855768819|0.0018157126058085378|1.0|1.4851744851094375e-08|1.0|0.17147937905343277|0.017959110547335063|7.151147533710687e-28|1.0|9.5701789582478…	1	1
GO:0030510	SPART FOXD1 CCN1 HOXA13 VWC2L XIAP SFRP4 PPARG GPC3 SMAD4 GDF5 VWC2 SMAD7 UBE2O TNFAIP6 KCP GDF3 FSTL1 WNT5A PPM1A FST FZD1 SMURF2 LRP2 DLX1 TWSG1 SOX11 TBX20 HIPK2 ABL1 UBE2D1 SKIL HES5 ENG ZNF423 CRIM1 MSX1 GATA4 DAND5 BAMBI MICOS10-NBL1 TOB1 NOG NBL1 FKBP8 RBPMS2 CTDSPL2 SORL1 CER1 SKOR2 DKK1 NOTCH1 CHRDL2 RNF165 FBXL15 GREM1 RBPJ SMAD6 HES1 BMPER CDH5 SKI GDF2 HTRA1 PCSK6 ITGA3 FBN1 CHRD PELO…	104	regulation of BMP signaling pathway	TGF-beta/BMP Signaling Regulation	The system of interacting proteins primarily involves the regulation of TGF-beta/BMP signaling pathways, which play crucial roles in various cellular processes such as cell growth, differentiation, and development. The following analysis highlights the key proteins and their roles in this process: 1. SMAD proteins (SMAD2, SMAD4, SMAD6, SMAD7): These proteins are central to the TGF-beta/BMP signal…	0.355769	37	0.903225	1	0.999918	myeloid leukocyte differentiation	0.30755	4564	0.62633	regulation of BMP signaling pathway|BMP signaling pathway|regulation of SMAD protein signal transduction|regulation of activin receptor signaling pathway|regulation of transforming growth factor beta receptor signaling pathway|positive regulation of BMP signaling pathway|negative regulation of BMP signaling pathway|activin receptor signaling pathway|transforming growth factor beta receptor signal…	0.9032253|0.8249296|0.75863665|0.75808823|0.7429491|0.7406922|0.7212151|0.7044325|0.6777923|0.6776943|0.6712153|0.6677434|0.6675457|0.6611626|0.65932226|0.6523366|0.64687884|0.63914895|0.6383766|0.6374713|0.6349744|0.634043|0.62834686|0.6258223|0.621506|0.6214645|0.6212839|0.6198951|0.61961526|0.6172987|0.6162446|0.6150834|0.61478484|0.6132959|0.60930216|0.60822207|0.6078533|0.60680425|0.60236084…	6.286976052473768e-275|4.900801968575622e-232|3.4336931286659626e-08|1.9896293473750174e-12|5.7164749391327666e-27|9.635794290751461e-91|1.9713491946197836e-135|8.225925997481567e-19|9.536112852913303e-29|2.1934396717491137e-22|0.01495197803540255|0.012095373285694027|4.4092839965663744e-08|0.13066862306395102|3.1597219074599598e-227|1.7737011445923653e-05|1.0|3.579036678376441e-15|1.0|4.61672973…	3.929360032796105e-273|1.884923834067547e-230|9.511615314864163e-08|7.681966592181533e-12|4.142373144299106e-26|1.7206775519199035e-89|8.960678157362653e-134|5.792905632029273e-18|9.730727400931941e-28|1.8278663931242613e-21|0.028864822462167084|0.026998601084138454|1.7566868512216632e-07|0.25274395176779696|3.9496523843249494e-225|6.462078662674227e-05|1.0|2.90978591737922e-14|1.0|1.654741838890…	7.94307e-06	0.000722097
GO:0002573	SPI1 BATF3 SIRT1 UBD LILRB3 GATA2 RB1 DHRS7B PRTN3 TESC JUNB LOC107987462 NKAP IL15 IL23A GAB2 CLPB RARA CTNNBIP1 PPARG JAGN1 GPC3 FES RUNX1 GATA1 CD109 TNFAIP6 TFE3 NDFIP1 TCIRG1 TLR4 BATF2 ACIN1 SNX10 RIPK1 OCSTAMP TOB2 TFRC CEBPE NEDD9 NKX2-3 IL25 LOC102725035 JUN TLR3 CDC42 BAP1 TNFRSF11A MTOR MYH9 LRRC17 FSHB TGFBR2 MAFB GPR55 GPR137 TCTA ID2 IL34 KIT HSF1 EVI2B NR3C1 OSCAR POU4F1 GBA1 ITGB6…	221	myeloid leukocyte differentiation	Immune Response Regulation	The system of interacting proteins primarily performs the regulation of immune response. Key proteins involved in this process include SPI1, BATF3, SIRT1, GATA2, IL15, IL23A, RARA, PPARG, RUNX1, GATA1, TLR4, BATF2, TLR3, TNFRSF11A, MTOR, TGFBR2, GPR55, IL34, KIT, NR3C1, TGFB1, VEGFA, IRF4, IFNG, TYROBP, CSF1R, TRAF6, BMP2, IL12B, MMP9, IL5, IL23R, EPHA2, TREM2, TNFSF11, CSF1, GATA3, BATF, MYC, TN…	0.348416	77	0.411133	1512	0.876208	cellular response to purine-containing compound	0.364125	2687	0.780007	regulation of immune response|regulation of immune system process|regulation of tolerance induction dependent upon immune response|immune response|regulation of adaptive immune response|regulation of immunoglobulin mediated immune response|regulation of inflammatory response to antigenic stimulus|negative regulation of immune response|tolerance induction dependent upon immune response|regulation …	0.9719341|0.8738882|0.8521298|0.8474562|0.83328724|0.826515|0.80373853|0.80076635|0.7768944|0.7730937|0.76899165|0.7522316|0.7469813|0.74372804|0.74073744|0.73589945|0.735741|0.73330474|0.7317555|0.72800374|0.7255094|0.71972114|0.7192346|0.7187544|0.7186443|0.71170175|0.70486116|0.7026454|0.69946605|0.69635475|0.69339466|0.691874|0.6830628|0.6804805|0.68034935|0.6784929|0.6778301|0.6768496|0.6758…	1.1720950736471855e-29|1.8759297535606996e-124|1.0|1.7115361979237992e-45|7.313541615284436e-16|0.00015780636759094008|3.2180592307023053e-09|2.8261437812825546e-11|1.0|2.404816488278277e-26|7.756848720050924e-26|2.4019933749382172e-24|3.6763077163172244e-14|5.4470414596192125e-133|0.03817604528947065|0.026980568936292366|0.1102298480163452|1.915715750078042e-13|2.995616296240114e-22|1.4694649039…	4.688380294588742e-29|3.291104830808245e-123|1.0|1.630034474213142e-44|3.620565156081404e-15|0.00038117480094429973|1.1744741717891624e-08|1.278798091078079e-10|1.0|2.290301417407883e-25|7.116374972523784e-25|2.3782112623150665e-23|2.2554035069430823e-13|2.4759279361905514e-131|0.079368077524887|0.056563037602290075|0.21445495723024358|1.4403877820135655e-12|3.3284625513779044e-21|9.0707710119790…	1	1
GO:0002705	SPI1 ARID5A SHLD1 CD1C STAT6 NLRP3 IL12A FOXP3 DHX36 FCGR1A IL23A STAP1 TICAM1 STAT5B STX7 VAV1 ITGB2 CLEC7A BTK CD226 EXOSC6 HPX P2RX7 MAD2L2 CRTAM CADM1 TFRC DENND1B B2M IL1R1 ZBTB1 HSPD1 HLA-F HLA-DRA TP53BP1 KMT5C KLRC4 CYRIB IL18 KIT CD28 MR1 CD177 EXOSC3 SH2D1B TNFSF4 FCER2 SASH3 ARG1 ZP3 LTA TRAF2 KLRC3 TBX21 HLA-G MAVS KLRK1 HLA-B NECTIN2 KLRC4-KLRK1 TGFB1 CD1B CD1D SLAMF1 NCR3 IL6 TYROBP…	139	positive regulation of leukocyte mediated immunity	Immune Response Regulation	The system of interacting proteins primarily performs the regulation of immune response. The proteins involved in this process are: 1. SPI1: A transcription factor that plays a crucial role in the development of hematopoietic cells, including immune cells such as macrophages and dendritic cells. 2. STAT6 and STAT5B: Members of the STAT family of transcription factors, which are involved in the re…	0.273381	38	0.524935	275	0.977485	oligosaccharide-lipid intermediate biosynthetic process	0.244646	8332	0.317832	regulation of immune response|regulation of immune system process|regulation of tolerance induction dependent upon immune response|immune response|regulation of adaptive immune response|regulation of immunoglobulin mediated immune response|regulation of inflammatory response to antigenic stimulus|negative regulation of immune response|tolerance induction dependent upon immune response|regulation …	0.9719341|0.8738882|0.8521298|0.8474562|0.83328724|0.826515|0.80373853|0.80076635|0.7768944|0.7730937|0.76899165|0.7522316|0.7469813|0.74372804|0.74073744|0.73589945|0.735741|0.73330474|0.7317555|0.72800374|0.7255094|0.71972114|0.7192346|0.7187544|0.7186443|0.71170175|0.70486116|0.7026454|0.69946605|0.69635475|0.69339466|0.691874|0.6830628|0.6804805|0.68034935|0.6784929|0.6778301|0.6768496|0.6758…	5.496388232418506e-173|4.505922317228998e-154|0.024126702558679877|3.042325427934734e-144|3.926739927440951e-166|1.0562152548502755e-77|1.0962834155817426e-17|2.163763799866363e-22|0.0009582178978369861|7.708934332867238e-244|1.083614806831868e-182|1.3251592739160489e-21|8.770166374158203e-59|8.07809966881198e-121|0.00019473566726691192|0.0005373363738794949|4.0001033347887475e-09|1.6442106591227…	1.0992776464837012e-171|1.099005443226585e-152|0.03595633764333812|8.222501156580364e-143|1.2666902991745004e-164|1.6503363357035553e-76|7.027457792190657e-17|1.717272857036796e-21|0.002249337788349733|8.56548259207471e-242|9.851043698471529e-181|1.2157424531339897e-20|1.9489258609240452e-57|2.991888766226659e-119|0.0006241527797016407|0.0015529953002297542|2.1739692036895368e-08|2.56907915487936…	1	1
GO:0071902	FZD4 SIRT1 PKD2 TAOK3 PDGFD CCND1 AKAP13 FZD8 DBF4B DAB2IP SPDYE2B RHOA CCNK SPDYE17 MAP3K13 HSP90AB1 ACSL1 CCNT2 PLA2G1B ERN2 CD24 PDGFC TAOK2 PSMD10 EDN1 CEMIP ERBB2 STRADA PKD1 CCNB1 PDGFA CCND2 CALM1 SOS1 NTF3 ADRA2A CKS1B STRADB MAPRE3 AKT1 EPHA4 AXIN1 WNT5A RAF1 SPDYE3 TLR4 EGF BMPR1B P2RX7 PDGFB NOX4 MTCP1 GH1 CCND3 MEF2C SYAP1 PROX1 TNFRSF11A CCNY LRRK2 TGFA IL34 KIT SPDYE6 TENM1 EPGN PTK…	227	positive regulation of protein serine/threonine kinase activity	Wnt Signaling Pathway	The most prominent biological process performed by this system of interacting proteins is the Wnt signaling pathway. This pathway is crucial for various cellular processes, including cell proliferation, differentiation, and migration. The Wnt signaling pathway is initiated by the binding of Wnt ligands (e.g., WNT5A) to Frizzled receptors (e.g., FZD4, FZD5, FZD8, FZD10) and co-receptors (e.g., LRP…	0.118943	27	0.293479	4409	0.639021	axial mesoderm morphogenesis	0.376464	1275	0.895612	Wnt signaling pathway|canonical Wnt signaling pathway|cell-cell signaling by wnt|non-canonical Wnt signaling pathway|Wnt signaling pathway, calcium modulating pathway|regulation of Wnt signaling pathway|positive regulation of Wnt signaling pathway|regulation of non-canonical Wnt signaling pathway|canonical Wnt signaling pathway involved in regulation of cell proliferation|Wnt signaling pathway, p…	0.9999999|0.9190836|0.90107286|0.8886236|0.82764864|0.8265207|0.8005681|0.76815945|0.7648002|0.7590256|0.7427521|0.7407475|0.7232201|0.7212118|0.720903|0.7202718|0.719818|0.7129217|0.7117807|0.68580085|0.6621746|0.6537244|0.65139467|0.6499417|0.64029896|0.63813245|0.636315|0.62625533|0.6254454|0.6213274|0.620403|0.6199087|0.60825986|0.60199237|0.59726644|0.5922562|0.5884378|0.5858413|0.58567303|0…	3.718189894849924e-15|1.444877197448233e-12|4.226770834969551e-15|4.0706625435901946e-08|2.2460964025283878e-05|2.771859396364988e-07|1.736959360970275e-05|0.04931852238046044|0.07686740081728045|6.884019294240646e-05|0.01853548032294833|2.9621375806412617e-08|7.708237005774995e-05|0.05192196467220429|0.0003493977799935085|4.448221187425333e-05|1.0|0.0004653779970909007|0.006686408563761789|2.578…	1.0242947368732572e-14|4.224787127041617e-12|1.651082357409981e-14|1.1338892879081323e-07|5.284932711831501e-05|8.884164731939064e-07|4.570945686763881e-05|0.08085003668927941|0.13187610685661186|0.000193916036457483|0.03503871516625393|1.352574237735736e-07|0.00022805434928328385|0.1070555972622769|0.0010652371341265503|0.00015499028527614402|1.0|0.001440023194743774|0.01646898661025071|8.372412…	0.051922	0.675661
GO:0019646	NDUFC2 NDUFB1 COX2 NDUFB10 NDUFS1 NDUFA5 COX5A COX5B NDUFS5 COX3 ND1 AFG1L ND2 ND3 ND4 NDUFA4 COX7B SDHAF2 SDHB COX7B2 NDUFS2 UQCR11 NDUFA2 UQCRH NDUFS4 COX7A2L NDUFA10 NDUFS3 NDUFB6 COX6A2 COX8C UQCRFS1 COX4I2 UQCRQ NDUFS8 COX1 ND5 COX6A1 COQ9 PARK7 SDHC NDUFV1 NDUFC1 COX8A CYCS ND6 NDUFAB1 COX15 NDUFC2-KCTD14 NDUFB9 COX4I1 NDUFB8 NDUFB4 NDUFAF1 UQCRC1 UQCR10 COX6B1 NDUFB3 COX7A2 PINK1 SDHA DLD …	90	aerobic electron transport chain	Oxidative Phosphorylation	The interacting proteins primarily participate in the oxidative phosphorylation (OXPHOS) process, which is a crucial component of cellular respiration. This process involves the transfer of electrons through a series of protein complexes in the mitochondrial inner membrane, ultimately leading to the production of ATP. 1. Involvement of respiratory chain complexes: The majority of the proteins lis…	0.911111	82	0.691185	8	0.999345	response to auditory stimulus	0.31832	4193	0.656705	oxidative phosphorylation|regulation of oxidative phosphorylation|positive regulation of oxidative phosphorylation|negative regulation of oxidative phosphorylation|aerobic respiration|cellular respiration|pentose-phosphate shunt, oxidative branch|aerobic electron transport chain|oxygen metabolic process|glycolytic process|phosphorylation|electron transport chain|respiratory electron transport cha…	0.99999976|0.80342305|0.8013146|0.7272001|0.7227429|0.72211516|0.71065676|0.6911854|0.6779686|0.6695447|0.6656251|0.66295|0.66080403|0.6484431|0.6419567|0.6418315|0.63553|0.623307|0.622246|0.6209703|0.6161108|0.61291707|0.61182576|0.61068976|0.6092347|0.6073371|0.60526776|0.60116494|0.5992749|0.5964777|0.593246|0.5912342|0.58987683|0.5876401|0.58748806|0.58533204|0.5853045|0.58516705|0.5846319|0.…	3.574549868683273e-204|8.999150132103456e-10|1.0|0.0007475096504885019|5.839624003340547e-188|7.080934648079662e-177|1.0|1.5892349112468296e-243|1.0|1.0|0.9893527983354672|1.0011525915232553e-192|2.6976529601026225e-215|1.0|1.0|1.0|4.263347689934849e-227|1.0|1.0|0.35325202867457517|2.44698068544917e-89|1.0|1.5566206292360018e-37|1.0|1.0|1.0|2.291809158038797e-18|0.9682086526842139|0.0001837372883…	1.1915166228944243e-202|2.295701564312106e-09|1.0|0.0014375185586317342|2.335849601336219e-186|2.832373859231865e-175|1.0|3.178469822493659e-241|1.0|1.0|1.0|7.286695206748521e-191|3.372066200128278e-213|1.0|1.0|1.0|6.090496699906927e-225|1.0|1.0|0.6122218867843591|6.991373386997628e-88|1.0|2.9935012100692343e-36|1.0|1.0|1.0|2.6962460682809375e-17|1.0|0.0007094103797363579|1.0|1.0|1.96002895734383…	1	1
GO:0032612	RIPK2 NAIP PYDC2 LPL NLRP3 NLRP1 IL10 CLEC7A ORM2 GBP5 MYD88 PYDC1 PYHIN1 WNT5A SERPINB1 TLR4 P2RX7 NR1H4 PYCARD TLR8 NLRP2 ORM1 AIM2 HAVCR2 CARD18 NLRP7 NOD1 GHSR FFAR1 CARD8 CCL19 CCL3 CX3CR1 CEACAM1 MNDA LILRB4 STAT3 IFNG PANX2 HMGB1 TYROBP INAVA IL6 HSPB1 ELF4 STMP1 CASP1 NLRC4 TNFAIP3 GIT1 GHRL CD33 FZD5 F2R NOD2 TREM2 CARD17P HDAC2 ZC3H12A TLR6 AGER NLRP10 APP PML FFAR4 TMED10 FOXP1 MEFV SM…	113	interleukin-1 production	Inflammasome Activation and Regulation	The primary biological process performed by this system of interacting proteins is the activation and regulation of inflammasomes. Inflammasomes are multiprotein complexes that play a crucial role in the innate immune response, particularly in response to pathogen-associated molecular patterns (PAMPs) and damage-associated molecular patterns (DAMPs). Key proteins involved in inflammasome activati…	0.150442	17	0.373046	1510	0.876371	positive regulation of mRNA binding	0.289666	5666	0.536106	inflammasome complex assembly|NLRP3 inflammasome complex assembly|regulation of NLRP3 inflammasome complex assembly|nucleotide-binding oligomerization domain containing 1 signaling pathway|nucleotide-binding oligomerization domain containing signaling pathway|regulation of nucleotide-binding oligomerization domain containing signaling pathway|regulation of nucleotide-binding oligomerization domai…	0.86787885|0.80428416|0.79063106|0.7559713|0.75528616|0.74749756|0.7467766|0.72742546|0.72569263|0.7240164|0.71652746|0.7119413|0.6921816|0.65135527|0.64867014|0.6410936|0.621598|0.6150869|0.6113037|0.61011845|0.59700096|0.596836|0.59185445|0.58713007|0.5794598|0.5749834|0.57016516|0.56899774|0.56490594|0.5638964|0.56182456|0.55979335|0.55725014|0.5515644|0.551248|0.54721266|0.54688126|0.5453087|…	7.068286461428431e-32|2.952782829309683e-30|3.881141948601076e-26|5.495777338149118e-06|5.440766396198723e-07|0.003202779079861692|0.0002561188326349254|4.6897441761397914e-08|0.0011747527307076249|3.4495141517313883e-13|0.03890474643637659|0.019643635319431155|0.03252642003517984|4.3057302546768235e-05|2.548010410811028e-32|7.390489617491067e-18|1.0|0.019643635319431155|0.001251139935502383|1.87…	3.0206352399266795e-31|1.4913044592473145e-29|2.324037094970704e-25|1.2958957917705983e-05|1.5500758963529127e-06|0.006563071884962484|0.0005768442176462284|1.6630298496949618e-07|0.0027447493708122076|1.9058089236085018e-12|0.06825394111645017|0.04197357974237426|0.06160306824844666|0.00014898720604418074|3.397347214414704e-31|7.541315936215375e-17|1.0|0.044342291917451815|0.0035243378464855863|…	1	1
GO:0018108	EPHB4 HGF CD44 THY1 FLT4 MAP2K3 ANGPT1 CLK2 DMTN GGNBP2 CSPG4 FES ITGB2 INPP5F TNFRSF14 ADRA2A NCAPG2 PDGFRA TEC EPHA4 NCK2 EGF EPHB3 ANGPT4 FGF7 INSRR HCK GH1 NRG1 DGKQ RAP2B NEDD9 EFEMP1 IFNA2 MTOR AGT ROS1 DDR1 HSF1 SH2D1B ADAM17 LEP TNFRSF18 TTK LYN IL31RA FGR BMX LILRB4 IL6 IFNG NEURL1 NEK1 BTC PRKCE IBTK IL12B GHRL IL5 VPS25 CD74 MAPK3 EPHA2 PRKCZ LRP8 TNFRSF1A CNTF AXL HDAC2 CD300A EPHA3 L…	374	peptidyl-tyrosine phosphorylation	Cell Signaling and Growth Regulation	The system of interacting proteins primarily involves cell signaling and growth regulation. Key proteins in this system include growth factors (HGF, EGF, FGF7, NRG1, GH1, IGF1, VEGFA, TGFB1), receptor tyrosine kinases (EPHB4, FLT4, PDGFRA, EPHA4, EPHB3, INSRR, EPHB1, ERBB4, ABL1, EGFR, ERBB3, KDR, INSR, MERTK, ALK, IGF1R, RET, EPHA8, PDGFRB, FGFR2, FLT1, FGFR4, FGFR1, MUSK, DDR2), and intracellul…	0.639037	239	0.347755	4661	0.618389	regulation of membrane depolarization	0.367891	3784	0.690192	regulation of signaling|signaling|regulation of cellular response to growth factor stimulus|cell-cell signaling|regulation of cell growth|cellular response to growth factor stimulus|regulation of cell growth by extracellular stimulus|regulation of signal transduction|response to growth factor|signal transduction|growth hormone receptor signaling pathway|regulation of intracellular signal transduc…	0.7952857|0.7685315|0.7660884|0.7650902|0.7614974|0.759982|0.7539449|0.7460385|0.73570615|0.7233785|0.7076885|0.6973332|0.6964768|0.69614804|0.6929469|0.68802214|0.6859398|0.6776972|0.67745334|0.6768107|0.67518663|0.6749574|0.6738778|0.6734292|0.66203845|0.6616163|0.6600132|0.6595344|0.6587852|0.65687025|0.6563333|0.65607786|0.6528387|0.6527417|0.6510167|0.650962|0.6480131|0.64596987|0.64203405|0…	2.117124082100431e-114|1.0650662190120469e-113|8.745566230271941e-12|2.235486708799829e-23|2.809191569763397e-12|1.8726744970235803e-38|1.0|1.545359553470673e-122|8.844751862276964e-39|3.7724851656492775e-123|1.556275718786653e-17|1.0444766301342127e-92|0.08716063291662066|2.9605025302362818e-92|6.582938856359173e-179|1.8931902128946765e-114|0.012181171570534735|0.04326084080578545|3.496330943497…	2.5507519061450975e-113|1.6385634138646875e-112|3.015712493197221e-11|1.3227732004732714e-22|1.1608229627121477e-11|1.6572340681624604e-37|1.0|9.658497209191707e-121|1.1055939827846204e-37|1.2169306985965412e-121|1.0586909651609885e-16|3.6016435521869403e-91|0.1562018511050549|9.25157040698838e-91|6.582938856359173e-177|1.3522787234961975e-112|0.028949873270727813|0.08810761874905386|6.2434481133…	0.0669935	0.76129
GO:0001952	CDH13 PHLDB2 PTEN THY1 RHOA S100A10 DMTN CD3E VCL SDC4 CLASP1 PLEKHA2 EFEMP2 WNT4 ONECUT2 ADAM15 BCAS3 ONECUT1 BCL6 LIMCH1 ABL1 SLC9A1 ITGB1BP1 LIMS1 FMN1 BST1 GSK3B DDR1 FERMT1 MMP14 MACF1 TSC1 PTK2B PIK3CB BCL2 RRAS JAG1 CX3CL1 DUSP3 JUP FAM107A TEK MYF5 RAC1 DISC1 CDKN2A DLC1 VEGFA GREM1 CCL28 AJAP1 APOD CAMSAP3 CORO1C GFUS PLET1 ARHGAP6 PKHD1 MYOC PTK2 PTPRA LDB1 NF2 CASK SEMA3E PRKCZ ACER2 S…	121	regulation of cell-matrix adhesion	Cell Adhesion and Migration Regulation	The primary biological process performed by this system of interacting proteins is the regulation of cell adhesion and migration. This is supported by the presence of several key proteins involved in these processes. 1. CDH13: This protein is a member of the cadherin family, which plays a crucial role in cell-cell adhesion. Its presence suggests that the system is involved in maintaining cell adh…	0.0826446	10	0.821575	1	0.999918	Fc receptor mediated inhibitory signaling pathway	0.364775	3408	0.720976	regulation of cell-matrix adhesion|regulation of cell-cell adhesion|regulation of cell adhesion|regulation of cell migration|regulation of calcium-dependent cell-cell adhesion|regulation of cell-substrate adhesion|regulation of calcium-independent cell-cell adhesion|regulation of leukocyte cell-cell adhesion|regulation of cell motility|regulation of cell-cell adhesion mediated by integrin|regulat…	0.8215747|0.817742|0.8160204|0.7816459|0.7447986|0.7439239|0.74155784|0.7402497|0.72784746|0.716444|0.7054384|0.7040845|0.7035551|0.703491|0.70262784|0.70191073|0.69903195|0.6983034|0.69792944|0.6958129|0.69198805|0.69121915|0.6893569|0.68506074|0.6827689|0.6823432|0.6798028|0.6700367|0.6699447|0.6696977|0.66628146|0.6614415|0.6597031|0.65957433|0.65744245|0.6567755|0.6566216|0.6539463|0.6531251|…	5.779311133117e-312|2.407425076832869e-20|3.3803564940114008e-167|1.498000819717064e-83|1.0|6.92602348768231e-249|0.014065503439060545|6.027673647711943e-09|8.152581697261288e-83|0.002606085394008293|5.919845943932359e-11|0.0007040560230017771|1.980166973117473e-20|2.731776842066483e-130|1.0|1.1795901157971498e-17|3.918908651445798e-26|1.0|0.23618206776970058|0.000415594201490283|1.0|7.7301305609…	6.42145681457497e-310|9.223850869091452e-20|1.090437578713355e-165|2.3406262808079126e-82|1.0|5.3277103751402387e-247|0.02441927680392456|2.3272871226687038e-08|2.6298650636326736e-81|0.006103244482455019|3.083253095798104e-10|0.001966636935759154|1.7523601532013035e-19|1.187729061768036e-128|1.0|1.1795901157971497e-16|5.089491755124413e-25|1.0|0.4559499377793447|0.0011576440152932675|1.0|3.86506…	1	1
GO:0070936	AMFR RNF34 KBTBD6 GABARAP KBTBD7 TNFAIP3 UBE2C UBE2T KLHL3 BFAR UBE2D4 ITCH RNF126 UBE2E3 UBE2Q2 SKP1 ZNRF1 ARIH2 HACE1 TOPORS CDC34 PPIA NEDD4L RNF8 UBE2K UBE2D3 RNF146 TTC3 FBXO38 BTRC RBX1 UBE3C UBE2G1 UBE2E1 RNF4 UBE2D2 RNF5 NHLRC4 CUL1 PRKN RNF6 BIRC2 UBE2A RNF187 SKP2 UBE2G2 RFFL DTX3L TRIM32 RNF152 UBE2E2 UBE3A TRIM44 SYVN1 UBE2H CUL3 UBE2B TRIM38 UBE2R2 IFI27 UBE2D1 MARCHF6 PELI1 NMI RNF2…	68	protein K48-linked ubiquitination	Ubiquitin-Proteasome System Regulation	The interacting proteins in this system primarily function in the regulation of the ubiquitin-proteasome system (UPS), which is responsible for protein degradation and maintaining cellular homeostasis. The UPS is crucial for various cellular processes, including cell cycle progression, signal transduction, and protein quality control. 1. E3 ubiquitin ligases: The majority of the proteins listed a…	0.455882	31	0.522007	115	0.990585	negative regulation of protein secretion	0.272157	5604	0.541182	regulation of proteasomal ubiquitin-dependent protein catabolic process|regulation of ubiquitin-dependent protein catabolic process|regulation of protein ubiquitination|regulation of protein polyubiquitination|regulation of ubiquitin-specific protease activity|proteasome-mediated ubiquitin-dependent protein catabolic process|regulation of protein monoubiquitination|regulation of proteasomal prote…	0.81171185|0.7879896|0.77632076|0.7705391|0.7630521|0.7566774|0.7413117|0.7392354|0.72423637|0.7238873|0.72294617|0.71892637|0.7158719|0.6923641|0.68782467|0.6787163|0.67844594|0.66555417|0.6646049|0.6617723|0.6614513|0.659565|0.65084755|0.6505728|0.64858353|0.6483712|0.63711274|0.63438284|0.6322095|0.62907875|0.6248193|0.6191315|0.61463964|0.6137467|0.61185676|0.61026275|0.6042926|0.5993819|0.59…	0.0002571905356065618|6.515857932302701e-05|5.377405327500822e-21|1.8765106445094296e-15|1.0|1.1380172030191055e-49|0.023565714210764203|0.00012211470563568524|0.00016303550741238906|2.6710355245794553e-05|0.011852072107029477|0.023565714210764203|0.042785147260124584|1.009922478985994e-71|1.0|0.0005714079935563585|1.0|3.452034765140745e-05|0.0017943951835833417|3.898533349663604e-06|8.4486411330…	0.00037273990667617654|0.00011273110609520245|2.688702663750411e-20|8.266566715900571e-15|1.0|1.2644635589101173e-48|0.03973982160331232|0.0002914432115410149|0.00042679452202196085|7.855986836998397e-05|0.02323935707260682|0.04919773321662673|0.07967438968365843|2.6576907341736687e-70|1.0|0.001631106129980515|1.0|0.00012507372337466468|0.004823642966621886|1.4228223903881767e-05|5.38130008474433…	0.218728	1
GO:0042274	RRP36 TBL3 RIOK2 ABT1 RPS6 LSM6 UTP6 UTP25 WDR3 RRP7A LTV1 WDR46 HELB ERAL1 RRS1 RIOK1 UTP23 PWP2 NOB1 PRKDC RIOK3 SURF6 RPS16 FCF1 SNU13 RCL1 TSR1 UTP20 RPS14 SRFBP1 RPSA TSR3 RPS28 IMP3 RPS15 RPS5 DDX52 NGDN HEATR1 NPM1 NAT10 PINX1 DHX37 DCAF13 UTP3 ERCC2 BMS1 MPHOSPH10 KRI1 GTF2H5 WDR43 IMP4 RPP40 RPS17 RPS19 MRPS11 UTP4 MRPS7 SLX9 RPS27L METTL17 RPL38 NOP14 RPS8 NOM1 BYSL NOL11 EMG1 RPS24 NOL…	78	ribosomal small subunit biogenesis	Ribosome Biogenesis	The primary biological process performed by this system of interacting proteins is ribosome biogenesis. Ribosome biogenesis is the process of synthesizing ribosomes, which are essential for protein synthesis in cells. The proteins in this system are involved in various stages of ribosome biogenesis, including assembly, maturation, and transport of ribosomal subunits. 1. Assembly of ribosomal subu…	0.987179	77	0.808094	5	0.999591	negative regulation of synapse maturation	0.181953	9555	0.217701	ribosome biogenesis|ribosome assembly|cytosolic ribosome assembly|ribosomal large subunit biogenesis|ribosomal small subunit biogenesis|regulation of ribosome biogenesis|ribosomal large subunit assembly|ribosomal small subunit assembly|ribosome disassembly|rRNA processing|RNA biosynthetic process|rRNA modification|rRNA transcription|negative regulation of ribosome biogenesis|mitochondrial ribosom…	1.0|0.9300495|0.836871|0.8348553|0.8080938|0.80265546|0.78222674|0.7521616|0.7258208|0.7232456|0.7224903|0.6953383|0.6908642|0.6786423|0.65283763|0.649443|0.64736474|0.6416321|0.64003193|0.6397019|0.63140845|0.62979376|0.6283956|0.62352514|0.6180389|0.6169933|0.6158607|0.6126322|0.60886574|0.608678|0.6046933|0.6042159|0.6040381|0.60332906|0.60060877|0.59610444|0.5944021|0.59329903|0.5930072|0.592…	5.859934901575598e-142|2.4914138242975997e-33|1.0|2.4570386728340175e-05|7.370031942077799e-216|1.0|0.006187064211309691|2.3529609361106916e-41|1.0|6.343683533314079e-111|0.8955970841961781|0.0004896880995630879|0.0006296378437502167|1.0|1.0|0.022543728821998194|1.0|1.0|1.0|9.825049367092226e-17|4.5098957921407964e-138|3.9883664108491e-127|1.0|0.015705588697219042|3.0952651752699315e-69|0.0253726…	9.156148283711871e-141|1.3689086946690108e-32|1.0|5.435926267331897e-05|3.878964180040947e-214|1.0|0.01156460600244802|3.2232341590557422e-40|1.0|1.9824011041606496e-109|1.0|0.0014071497113881837|0.0016525927657486002|1.0|1.0|0.04796538047233659|1.0|1.0|1.0|7.797658227850973e-16|2.1475694248289506e-136|2.3460978887347642e-125|1.0|0.03868371600300256|6.44846911514569e-68|0.058445548650188445|1.0|0…	1	1
GO:0042471	FRZB HMX2 TBX1 GATA2 SOD1 COL11A1 EDN1 HMX3 TMIE CHRNA9 HOXA1 PAX2 LRIG3 TTC39C DLX6 TBX2 MYO6 GSC WNT5A ITGA8 FOXG1 SOBP SLC9A3R1 TSHZ1 MYO3B FGF9 PROX1 GRXCR2 CDH23 DVL1 MSX1 CTHRC1 SEC24B HOXA2 NTN1 PAX8 PLS1 HESX1 MAFB WDR19 EDNRA USH1C NOG ALDH1A3 EYA1 GBX2 POU4F3 COL2A1 MYO15A FZD6 TBX18 INSIG1 FOXI1 CEP290 EPHB2 FZD2 FGFR2 SOX9 STRC PDZD7 TCAP KCNQ1 INSIG2 SCRIB MAPK3 SLITRK6 LRIG1 DLX5 CH…	124	ear morphogenesis	Inner Ear Development and Function	The interacting proteins in this system are primarily involved in the development and function of the inner ear. Key proteins include transcription factors, signaling molecules, and structural proteins that contribute to the formation and maintenance of the inner ear's complex structure. 1. Transcription factors: Several transcription factors, such as TBX1, GATA2, HMX2, HMX3, PAX2, PAX8, and SOX9…	0.225806	28	0.724022	17	0.998608	regulation of acrosomal vesicle exocytosis	0.339647	3557	0.708777	inner ear development|inner ear morphogenesis|inner ear receptor cell development|cochlea development|inner ear receptor cell differentiation|outer ear morphogenesis|inner ear auditory receptor cell differentiation|ear development|middle ear morphogenesis|cochlea morphogenesis|otic vesicle development|semicircular canal development|labyrinthine layer development|otic vesicle morphogenesis|otolith…	0.9729369|0.92648464|0.8657205|0.8078624|0.8012468|0.8009179|0.786058|0.77707577|0.7750257|0.76436377|0.76096535|0.7570451|0.75271887|0.7484127|0.7329551|0.7277938|0.72402227|0.716624|0.7086822|0.7079983|0.70782256|0.706684|0.70298123|0.69869715|0.6974683|0.69684136|0.68432134|0.6806711|0.6780797|0.6767496|0.6748716|0.67145586|0.6687268|0.6686867|0.65876603|0.6575905|0.6539997|0.65267366|0.648684…	2.9922830358767802e-198|3.066821759770092e-249|1.3213346295261052e-40|1.456034752087615e-50|1.7588663774305382e-42|5.954941794569629e-18|1.1935040161475353e-38|1.7204216229589857e-253|3.069975758116635e-44|3.9405505849692533e-53|7.495657457369748e-30|5.327200512811607e-17|0.04716106628351545|2.7051359765983385e-22|4.467069074870975e-09|1.8248161897794226e-11|2.17999e-318|0.14767712195454916|8.722…	9.067524351141758e-197|1.3334007651174314e-247|1.1489866343705263e-39|1.5167028667579324e-49|1.8514382920321455e-41|3.134179891878752e-17|1.3261155734972615e-37|4.301054057397464e-251|4.1486158893468046e-43|7.164637427216824e-52|8.147453758010596e-29|4.005413919407223e-16|0.08765997450467555|2.732460582422564e-21|2.454433557621415e-08|1.2329839120131235e-10|1.089995276e-315|0.27551701857192007|7.…	1	1
GO:0051092	FLOT2 RIPK2 NLRP3 PRKCI FLOT1 CARD11 PSMA6 MAP3K13 IL18RAP PLA2G1B EDA TRIM8 MID2 PRKCB TRIM5 TICAM1 AMH CLEC7A CAPN3 MYD88 BTK TERF2IP WNT5A RIPK3 CARD14 TLR4 RAB7B CAV1 EP300 RIPK1 CARD9 RPS6KA5 PYCARD PRKD1 TFRC TRIM14 TRIM15 TLR3 TNFRSF11A TRIM6 AIM2 DHX9 AGT RNF31 CHUK HSPA1A S100A9 DDRGK1 IL18 TRIM37 NOD1 RELA PRKD2 TRIM62 CX3CR1 TRAF2 USP14 TRIM27 MTDH TRIM32 TLR9 INS TRIM13 GREM1 TRIM38 S…	155	positive regulation of NF-kappaB transcription factor activity	Inflammasome Activation and Regulation	The primary biological process performed by this system of interacting proteins is the activation and regulation of inflammasomes, which are multiprotein complexes involved in the innate immune response. Inflammasomes play a crucial role in the production of pro-inflammatory cytokines and the initiation of inflammatory cell death, known as pyroptosis. 1. Central proteins in inflammasome activatio…	0.354839	55	0.335172	2936	0.75962	transcription initiation at RNA polymerase III promoter	0.211288	10127	0.170869	inflammasome complex assembly|NLRP3 inflammasome complex assembly|regulation of NLRP3 inflammasome complex assembly|nucleotide-binding oligomerization domain containing 1 signaling pathway|nucleotide-binding oligomerization domain containing signaling pathway|regulation of nucleotide-binding oligomerization domain containing signaling pathway|regulation of nucleotide-binding oligomerization domai…	0.86787885|0.80428416|0.79063106|0.7559713|0.75528616|0.74749756|0.7467766|0.72742546|0.72569263|0.7240164|0.71652746|0.7119413|0.6921816|0.65135527|0.64867014|0.6410936|0.621598|0.6150869|0.6113037|0.61011845|0.59700096|0.596836|0.59185445|0.58713007|0.5794598|0.5749834|0.57016516|0.56899774|0.56490594|0.5638964|0.56182456|0.55979335|0.55725014|0.5515644|0.551248|0.54721266|0.54688126|0.5453087|…	8.747082143778851e-13|3.71708191509392e-13|6.55632287620538e-10|0.0011894276657034894|1.806453636855508e-09|0.0001939311116433922|0.03567778665947599|3.6818571995506956e-09|3.925706283043338e-05|4.3772143290678275e-10|1.4208469985411471e-05|0.026878708361291522|7.15175850305602e-06|0.017999864459300352|1.8792507880765816e-42|3.891794245073003e-06|1.0|1.0|0.024916012247832228|7.096807271354453e-22…	2.2088591272168814e-12|1.1162408153435193e-12|2.0173301157555016e-09|0.002227392632403538|6.294263543050551e-09|0.0004650626178498614|0.05782461371065801|1.4438655684512531e-08|0.0001112098097179416|1.9282882506906727e-09|4.510625392194118e-05|0.055649499712818885|2.399918960757054e-05|0.040430508922977976|3.1320846467943026e-41|1.5505156354872522e-05|1.0|1.0|0.05524614689098055|7.026541852826192…	1	1
GO:0072709	MAP2K4 MAPK13 MAP2K7 MAP2K6 MAP2K3	5	cellular response to sorbitol	MAPK Signaling Cascade	The system of interacting proteins, MAP2K4, MAPK13, MAP2K7, MAP2K6, and MAP2K3, primarily participates in the mitogen-activated protein kinase (MAPK) signaling cascade. This cascade is crucial for regulating various cellular processes, including cell proliferation, differentiation, and apoptosis. 1. MAP2K4 (Mitogen-Activated Protein Kinase Kinase 4) is a dual-specificity kinase that phosphorylate…	1	5	0.373497	984	0.919437	facial nerve morphogenesis	0.304803	3668	0.699689	MAPK cascade|stress-activated MAPK cascade|stress-activated protein kinase signaling cascade|JNK cascade|p38MAPK cascade|ERK1 and ERK2 cascade|regulation of MAPK cascade|ERK5 cascade|positive regulation of MAPK cascade|non-canonical Wnt signaling pathway via MAPK cascade|regulation of stress-activated MAPK cascade|regulation of stress-activated protein kinase signaling cascade|regulation of p38MA…	0.9816447|0.8889824|0.84703624|0.8459676|0.84314275|0.80699587|0.78098315|0.777151|0.76200986|0.74471724|0.7073006|0.70220864|0.6843807|0.66557825|0.6647294|0.6634581|0.65154374|0.64237255|0.6412132|0.6346681|0.6317227|0.63128215|0.63057685|0.6275977|0.62608683|0.62511027|0.6236371|0.6223265|0.6169783|0.61667514|0.60956526|0.6086125|0.5939233|0.5935034|0.591673|0.59116715|0.58965594|0.5869807|0.5…	1.8163264557380964e-07|4.944096142528668e-10|5.840883433187594e-10|0.0010037109534979801|9.677945451731e-05|0.09207446153420959|1.1605352771735843e-05|1.0|3.1178928528181815e-06|1.0|0.0012582876054514417|0.00129694667805472|1.0|0.0006795409464378303|0.000544964165260883|0.0005620637838958937|1.0|1.0|1.0|0.0011703066805945994|1.0|1.0|1.0|0.00031330912607104554|1.0|0.08557654177698294|1.0|1.0|1.0|1…	3.266774200967799e-07|1.2775442228756246e-09|1.8027418003665414e-09|0.0018937942518829813|0.00021130885265788207|0.1461499389431898|3.136581830198877e-05|1.0|9.835624141382276e-06|1.0|0.0029959228701224804|0.0034958131483954717|1.0|0.0019602064720125887|0.0016219171585145325|0.0016151258157927981|1.0|1.0|1.0|0.003063630053912564|1.0|1.0|1.0|0.0010443637535701518|1.0|0.17536176593644046|1.0|1.0|1.…	1	1
GO:1905605	TJP2 OCLN TJP3 TJP1 ANGPT1	5	positive regulation of blood-brain barrier permeability	Tight Junction Formation and Regulation	Proteins: TJP2, OCLN, TJP3, TJP1, ANGPT1 1. Tight junction formation and maintenance: TJP1, TJP2, and TJP3 are members of the tight junction protein (TJP) family, also known as zonula occludens (ZO) proteins. They play a crucial role in the formation and maintenance of tight junctions between adjacent cells, which are essential for maintaining cell polarity and regulating paracellular permeabilit…	1	5	0.456934	285	0.976666	positive regulation of feeding behavior	0.194682	10355	0.152202	tight junction organization|tight junction assembly|regulation of bicellular tight junction assembly|bicellular tight junction assembly|tricellular tight junction assembly|tight junction disassembly|protein localization to bicellular tight junction|protein localization to tricellular tight junction|zonula adherens maintenance|regulation of cell junction assembly|positive regulation of bicellular …	0.92423654|0.91001546|0.8734116|0.84850645|0.83528507|0.7859428|0.76981515|0.7595067|0.7247039|0.70511127|0.70345855|0.69920385|0.68029946|0.67790914|0.67315066|0.6698029|0.66625863|0.66561764|0.65802896|0.6560807|0.6526209|0.6509365|0.650408|0.6436461|0.6415956|0.64094925|0.63642144|0.6329376|0.62617743|0.62589145|0.6247218|0.61514777|0.6145622|0.6143889|0.61286896|0.59888947|0.5918597|0.5907673…	0.00020252588055256517|0.00017250064017674418|0.005819689748137479|0.00014486443256599865|1.0|1.0|0.0011661126441566568|1.0|1.0|0.059767159883140006|1.0|0.014786634276294341|0.013921703943157913|0.0020399830142162085|1.0|1.575134493675651e-05|1.0|0.005238943039820865|1.0224906779298588e-07|2.2765092097578607e-06|1.5811828792859596e-08|4.330101019658409e-09|1.0|1.0|1.0|1.0|1.0|0.006159376796446114…	0.0002960904686441011|0.00029040511814266696|0.009540474996946687|0.0002993066788553691|1.0|1.0|0.0024193208385230374|1.0|1.0|0.10926354640427788|1.0|0.032355873689921974|0.02852808185073343|0.005469123362509942|1.0|5.7697234200573296e-05|1.0|0.013537320516332984|4.987759404535897e-07|8.462859515828478e-06|7.945642609477183e-08|2.46028467026046e-08|1.0|1.0|1.0|1.0|1.0|0.017204963118564565|1.0|0.0…	1	1
GO:2000697	STAT1 MMP9 OSR1 CTNNB1	4	negative regulation of epithelial cell differentiation involved in kidney development	Regulation of Cell Signaling and Extracellular Matrix Remodeling	Proteins: STAT1, MMP9, OSR1, CTNNB1. 1. STAT1: Signal Transducer and Activator of Transcription 1 - Role: Transcription factor involved in cellular responses to cytokines and growth factors. - Reasoning: STAT1 is activated by phosphorylation, leading to dimerization and nuclear translocation, where it binds to specific DNA sequences and regulates gene expression. 2. MMP9: Matrix Metalloproteinase…	1	4	0.212941	9552	0.217947	positive regulation of alcohol biosynthetic process	0.102388	12038	0.0144097	extracellular matrix-cell signaling|regulation of signaling|regulation of cell communication|regulation of signal transduction|regulation of intracellular signal transduction|regulation of extracellular matrix constituent secretion|regulation of response to extracellular stimulus|regulation of cell-matrix adhesion|regulation of extracellular matrix organization|cell-cell signaling|regulation of t…	0.8289468|0.7556155|0.7270825|0.71004575|0.7033658|0.7025906|0.694738|0.69401133|0.6873326|0.68202376|0.68027014|0.67434657|0.6581358|0.65701663|0.6526862|0.6523442|0.6485377|0.6472999|0.6447848|0.6382251|0.63700724|0.63578343|0.6344445|0.6321944|0.6314924|0.628494|0.627093|0.6263894|0.6249282|0.6247503|0.62389654|0.6209315|0.61844075|0.6177726|0.6159515|0.61548316|0.6151798|0.61480963|0.61478615…	1.0|0.02570967472050697|0.02592653603095888|0.018252791198905393|0.003647637403657522|1.0|1.0|1.0|1.0|0.33495017961317836|1.0|1.0|1.0|1.0|1.0|1.0|1.0|1.0|1.0|1.772044382744958e-05|1.0|0.19818686982003345|1.0|1.0|0.12524235045432866|0.1421291276212247|1.0|1.0|1.0|0.14864102038749893|1.0|1.0|1.0|0.05151720107454758|1.0|1.0|0.20978792324897244|1.0|0.11315057234585571|1.0|1.0|0.1554448481329715|1.0|1…	1.0|0.034233921065921394|0.03840968300882797|0.028789891480923334|0.0065723196462297686|1.0|1.0|1.0|1.0|0.5657942223195581|1.0|1.0|1.0|1.0|1.0|1.0|1.0|1.0|1.0|5.887190640348698e-05|1.0|0.3894100375448225|1.0|1.0|0.2550760701717488|0.28033358505172523|1.0|1.0|1.0|0.32885181501659055|1.0|1.0|1.0|0.11843034729781053|1.0|1.0|0.47570957652828216|1.0|0.26876620509704446|1.0|1.0|0.329332305366465|1.0|1.…	1	1
GO:0045050	EMC4 EMC7 MMGT1 EMC6 EMC8 EMC10 EMC9 EMC2 EMC3 EMC1	10	protein insertion into ER membrane by stop-transfer membrane-anchor sequence	Endoplasmic Reticulum Membrane Complex Assembly	The Endoplasmic Reticulum Membrane Complex (EMC) is a conserved protein complex involved in the biogenesis of membrane proteins. The interacting proteins EMC1-10 form the core components of this complex, which is essential for the proper functioning of the endoplasmic reticulum (ER). 1. EMC1-10 form a multi-subunit complex: The EMC complex is composed of 10 subunits (EMC1-10), which interact with…	0.1	1	0.525362	133	0.989111	response to pyrethroid	0.208691	9038	0.260029	endoplasmic reticulum membrane organization|endoplasmic reticulum tubular network formation|endoplasmic reticulum organization|endoplasmic reticulum membrane fusion|endoplasmic reticulum tubular network membrane organization|establishment of protein localization to endoplasmic reticulum membrane|endoplasmic reticulum tubular network organization|protein insertion into ER membrane|endoplasmic reti…	0.78014445|0.73982584|0.73546743|0.7268691|0.7234422|0.70779634|0.70120144|0.6935428|0.6801616|0.6586834|0.6550815|0.6437839|0.64251196|0.6393589|0.6383426|0.6359925|0.6354686|0.6346191|0.62756014|0.6235366|0.6233039|0.621879|0.62106436|0.6166502|0.61456954|0.61339986|0.6107263|0.60483617|0.60193515|0.59657454|0.592097|0.5906931|0.5898999|0.5898703|0.58647215|0.58625305|0.58505875|0.58481944|0.58…	1.0|1.0|9.483600788990146e-24|1.0|1.0|1.0|1.0|1.8966155575781295e-30|1.0|1.0|2.315003960907478e-15|1.0|1.0|1.0|1.0|1.0|1.0|1.0|1.0|1.0|1.0|1.0|1.0|1.0|0.4432547157060788|1.0|1.0|1.0|1.0|1.0|1.0|1.0|1.0|1.0|1.0|1.0|1.0|1.0|1.0|1.0|1.0|1.0|1.0|1.0|1.0|1.0|1.0|1.0|1.0|1.0	1.0|1.0|5.1822955131093697e-23|1.0|1.0|1.0|1.0|1.99643742902961e-29|1.0|1.0|1.4468774755671738e-14|1.0|1.0|1.0|1.0|1.0|1.0|1.0|1.0|1.0|1.0|1.0|1.0|1.0|0.8557040843746694|1.0|1.0|1.0|1.0|1.0|1.0|1.0|1.0|1.0|1.0|1.0|1.0|1.0|1.0|1.0|1.0|1.0|1.0|1.0|1.0|1.0|1.0|1.0|1.0|1.0	1	1
GO:0060753	VEGFC PGF VEGFD SWAP70 RAC2 VEGFA RIN3 VEGFB	8	regulation of mast cell chemotaxis	Angiogenesis	Proteins: VEGFC, PGF, VEGFD, SWAP70, RAC2, VEGFA, RIN3, VEGFB. 1. VEGF family involvement in angiogenesis: VEGFA, VEGFB, VEGFC, and VEGFD are members of the vascular endothelial growth factor (VEGF) family. These proteins play a crucial role in angiogenesis, the formation of new blood vessels from pre-existing ones. VEGFA is the most potent angiogenic factor, stimulating endothelial cell prolifer…	1	8	0.228903	8968	0.265761	granulocyte chemotaxis	0.384885	1598	0.869167	angiogenesis|sprouting angiogenesis|angiogenesis involved in wound healing|vasculogenesis|positive regulation of angiogenesis|blood vessel maturation|regulation of angiogenesis|vasculature development|blood vessel remodeling|blood vessel development|blood vessel morphogenesis|blood vessel endothelial cell proliferation involved in sprouting angiogenesis|angiogenesis involved in coronary vascular …	0.9999999|0.85713005|0.8413681|0.82467175|0.79476035|0.7837335|0.7670084|0.75543123|0.74672306|0.74473155|0.73775756|0.73272836|0.71411204|0.69922894|0.6876749|0.68617356|0.6842911|0.68083787|0.6733562|0.6732998|0.6701987|0.6672659|0.66715866|0.6657537|0.66467226|0.66152155|0.66083705|0.66055393|0.65932333|0.657934|0.6434027|0.6433994|0.6426142|0.641397|0.64060676|0.6391374|0.63890505|0.6365025|0…	1.3450074241727118e-06|1.1793859583267917e-09|0.012531747715562867|0.036732074957488245|3.997183282713433e-09|1.0|6.474169001613958e-08|6.760797261003569e-06|1.0|5.4962429143839994e-06|2.9436908807538054e-06|0.011146151676399745|1.0|0.009758854724675687|1.0|0.01805715847845387|0.02492586547160044|0.008369855070670739|0.03220611271195583|1.0|3.416341147307807e-09|0.05242743701043112|1.0|1.0|1.0|0.…	2.3110093198843846e-06|2.948464895816979e-09|0.01970400584207998|0.054905941640490646|1.3688983844909018e-08|1.0|2.143764570070847e-07|1.9044499326770618e-05|1.0|1.755988151560383e-05|1.0046726555473739e-05|0.025129499265026983|1.0|0.02364755786146172|1.0|0.03934021455000843|0.05551417699688294|0.020323456436530225|0.06881648015375177|1.0|1.8075879086284692e-08|0.11060640719500237|1.0|1.0|1.0|0.2…	0.0590852	0.71187
GO:0070343	FTO VSTM2A FGF10	3	white fat cell proliferation	Adipogenesis Regulation	Protein Interactions: 1. FTO: Fat mass and obesity-associated protein (FTO) is an RNA demethylase that plays a significant role in adipogenesis and energy homeostasis. FTO is associated with increased adipocyte differentiation and lipid accumulation. It has been linked to obesity and type 2 diabetes. 2. VSTM2A: V-set and transmembrane domain-containing 2A (VSTM2A) is a protein with limited inform…	1	3	0.420998	1690	0.861634	regulation of heart induction	0.497045	328	0.973146	regulation of adipose tissue development|regulation of fat cell differentiation|regulation of adiponectin secretion|adipose tissue development|regulation of osteoclast differentiation|regulation of macrophage differentiation|regulation of osteoblast differentiation|regulation of cell differentiation|regulation of mesenchymal stem cell differentiation|regulation of lipophagy|cellular response to l…	0.7351419|0.6767546|0.6623763|0.6421772|0.63882196|0.6290107|0.6262889|0.6247556|0.618295|0.6169142|0.6089102|0.60532665|0.6027301|0.6012223|0.60057575|0.599664|0.5983496|0.59697676|0.59496003|0.5946124|0.59064126|0.5897511|0.58891976|0.58833957|0.588297|0.58706665|0.58678305|0.5860892|0.58593357|0.58592635|0.58584327|0.58562607|0.58488417|0.58357763|0.58160555|0.58095723|0.5805908|0.5758276|0.57…	1.0|0.00018096431580816384|1.0|0.009245739889022588|1.0|1.0|1.0|0.0007872380894071374|1.0|1.0|1.0|1.0|1.0|1.0|2.446196430897061e-06|1.0|1.0|1.0|1.0|1.0|1.0|1.9647112048846765e-10|1.0|5.160209195225018e-06|1.0|1.1907340635837106e-12|1.0|1.0|1.0|0.0027972011800617403|2.495894693948132e-05|1.0|1.0|1.0|1.0|1.0|1.0|1.0|1.0|1.0|1.0|1.0|1.0|1.0|1.0|1.0|1.0|1.0|1.0|1.0	1.0|0.00030312280704885067|1.0|0.015156950637741947|1.0|1.0|1.0|0.0017151156631963777|1.0|1.0|1.0|1.0|1.0|1.0|1.0552572690063457e-05|1.0|1.0|1.0|1.0|1.0|1.0|1.2594302595414592e-09|1.0|2.123542878693423e-05|1.0|8.211959059198004e-12|1.0|1.0|1.0|0.009482037898514374|0.00010104836817603774|1.0|1.0|1.0|1.0|1.0|1.0|1.0|1.0|1.0|1.0|1.0|1.0|1.0|1.0|1.0|1.0|1.0|1.0|1.0	1	1
GO:0060157	MYOCD WNT5A RBP4 UPK3A	4	urinary bladder development	Regulation of Smooth Muscle Differentiation	Proteins: MYOCD, WNT5A, RBP4, UPK3A 1. MYOCD: Myocardin (MYOCD) is a transcriptional coactivator that plays a crucial role in smooth muscle cell differentiation. It interacts with serum response factor (SRF) to regulate the expression of smooth muscle-specific genes, such as smooth muscle actin and myosin heavy chain. This interaction is essential for the development and maintenance of vascular s…	1	4	0.365256	2565	0.789995	response to morphine	0.3021	5292	0.566727	regulation of smooth muscle cell differentiation|regulation of vascular associated smooth muscle cell differentiation|regulation of cardiac vascular smooth muscle cell differentiation|positive regulation of smooth muscle cell differentiation|smooth muscle cell differentiation|regulation of smooth muscle contraction|regulation of smooth muscle cell proliferation|regulation of myofibroblast differe…	0.98740137|0.8729174|0.86063457|0.8103167|0.8038398|0.8008319|0.79978496|0.7913725|0.7859472|0.78570616|0.7839314|0.78066957|0.7779085|0.7749874|0.77285326|0.77221274|0.75822854|0.7561791|0.74998754|0.74535584|0.73938894|0.7298956|0.724427|0.72387004|0.7231324|0.7199101|0.71736526|0.71523774|0.7095801|0.70514655|0.6986082|0.6946145|0.6902613|0.68961895|0.6887829|0.68733275|0.68450105|0.6825772|0.…	0.006749263180098405|1.0|1.0|0.00233120512666492|0.013926151920661798|0.01415701498216865|0.03226747918660298|1.0|1.0|0.019455685879591227|0.015080061870161768|0.031356538204388815|1.0|1.0|0.004425802688303004|1.0|1.0|1.0|1.0|0.0037279703307181587|1.0|1.0|1.0|1.0|0.010226825605965047|0.017154547338896937|1.0|1.0|1.0|0.01415701498216865|1.0|1.0|0.0055880418844245095|1.0|1.0|1.0|0.00186529051494942…	0.008543371114048614|1.0|1.0|0.004185287480547433|0.023249001536997993|0.02523532082383003|0.05255289769805045|1.0|1.0|0.03837413388479532|0.02905599589626545|0.06334654182704812|1.0|1.0|0.011348212021289755|1.0|1.0|1.0|1.0|0.008961467141149421|1.0|1.0|1.0|1.0|0.026494366854831728|0.041236892641579176|1.0|1.0|1.0|0.04091622827216373|1.0|1.0|0.01624430780355962|1.0|1.0|1.0|0.007092359372431278|0.0…	1	1
GO:1903147	TSC2 TSPO USP30 TP53 RNF41 PINK1 TIGAR	7	negative regulation of autophagy of mitochondrion	Mitochondrial Quality Control	Proteins: TSC2, TSPO, USP30, TP53, RNF41, PINK1, TIGAR 1. PINK1 and Mitophagy Regulation - PINK1 accumulates on damaged mitochondria, recruiting Parkin (RNF41) for ubiquitination of mitochondrial proteins. - PINK1 phosphorylates ubiquitin, enhancing RNF41 activity, leading to mitophagy. - USP30 counteracts RNF41 by removing ubiquitin, modulating mitophagy. 2. TSC2 and TP53 in Cell Cycle Regulatio…	1	7	0.615839	49	0.995988	renin secretion into blood stream	0.249925	8990	0.263959	mitochondrial DNA repair|mitochondrial genome maintenance|regulation of autophagy of mitochondrion|mitochondrial protein processing|mitochondrial fusion|regulation of mitochondrial fusion|maintenance of mitochondrion location|mitochondrial mRNA processing|mitochondrial RNA processing|mitochondrion organization|mitochondrial calcium ion homeostasis|regulation of mitophagy|autophagy of mitochondrio…	0.7490045|0.7318257|0.70900714|0.70527595|0.70514023|0.70450735|0.6929312|0.6885593|0.68013346|0.67597026|0.6748496|0.6687279|0.6657974|0.6639554|0.6612988|0.6597967|0.6575922|0.6553414|0.6526995|0.6489759|0.6482029|0.6459695|0.64354837|0.6426049|0.6420369|0.6416573|0.64089|0.64011765|0.6364594|0.63586354|0.63572884|0.6352663|0.6350225|0.6328296|0.6322165|0.63174194|0.63156766|0.6301859|0.6271357…	0.002039983014239978|0.012994366817242982|1.1930163169883098e-19|1.0|0.012590494751409503|1.0|1.0|1.0|1.0|2.8841963092142837e-11|1.0|3.406832802732619e-19|1.0977822247035063e-16|1.0|4.19077270345016e-05|1.0|0.0009643395623394119|1.0|1.0|3.8625676663865725e-16|1.0|1.0|1.0|1.0|1.0|1.0|0.006109250045682313|1.0|3.408077899830783e-15|1.0|1.0|0.015817508744028253|1.0|1.0|1.42805941572982e-06|0.02344545…	0.0027382322338791653|0.017948020465805223|5.497771046029078e-19|1.0|0.021160495380520176|1.0|1.0|1.0|1.0|1.3734268139115637e-10|1.0|2.792485903879196e-18|7.954943657271784e-16|1.0|0.00014913781862811956|1.0|0.002803312681219221|1.0|1.0|2.9942385010748622e-15|1.0|1.0|1.0|1.0|1.0|1.0|0.017017409598000872|1.0|3.341252842971356e-14|1.0|1.0|0.04045398655761701|1.0|1.0|6.966143491364977e-06|0.06169857…	1	1
GO:1902732	PBXIP1 COMP LTF SIRT6 LEF1 SIX2 MUSTN1 SOX9	8	positive regulation of chondrocyte proliferation	Chondrogenesis Regulation	Proteins: PBXIP1, COMP, LTF, SIRT6, LEF1, SIX2, MUSTN1, SOX9. Analysis: 1. COMP (Cartilage Oligomeric Matrix Protein) is a non-collagenous extracellular matrix protein involved in chondrogenesis and cartilage maintenance. It interacts with other matrix proteins, such as collagens and fibronectin, to maintain cartilage integrity. 2. SOX9 is a transcription factor that plays a crucial role in chond…	1	8	0.526816	172	0.985918	meiotic recombination checkpoint signaling	0.339156	5188	0.575242	regulation of cartilage development|regulation of chondrocyte differentiation|regulation of chondrocyte development|cartilage homeostasis|cartilage morphogenesis|cartilage development|chondrocyte differentiation|chondrocyte development|chondroblast differentiation|growth plate cartilage morphogenesis|regulation of ossification|growth plate cartilage chondrocyte differentiation|cartilage developme…	0.8174652|0.7938752|0.7908688|0.7706265|0.7469075|0.7396153|0.7267449|0.71833044|0.70341057|0.68067276|0.6796968|0.6729715|0.670899|0.6702663|0.66887|0.6678487|0.6663823|0.6503161|0.64672065|0.64433146|0.64231|0.6342187|0.6275657|0.625143|0.6201969|0.61867785|0.6185044|0.61168927|0.6092609|0.608546|0.598804|0.594377|0.59388065|0.5927387|0.5918383|0.58845174|0.5882791|0.5882749|0.585413|0.5826454|…	3.917212288594956e-06|1.6355912160654282e-06|1.0|0.0018652905149253332|1.0|1.118448582704459e-08|1.3169781624611094e-07|9.98688110526126e-05|1.0|1.0|1.6710235848946552e-07|0.004657518047012751|9.98688110526126e-05|0.0037275359247043813|0.00233113717952019|0.00697915092370877|0.00233113717952019|3.244975343001469e-05|1.0|1.0|0.008833044254946312|1.1203445761518708e-05|1.187709321708138e-05|0.00139…	6.561494620762071e-06|3.25167239774439e-06|1.0|0.0033914372998642417|1.0|4.0523499373349957e-08|4.234656470936043e-07|0.00024417802213352717|1.0|1.0|6.353701843705912e-07|0.011115794861605612|0.00029031631119945525|0.009631875774429926|0.006232987111016551|0.016582863049122997|0.006421865508320083|0.00011799910338187158|1.0|1.0|0.020541963383596075|4.4635242077763775e-05|4.516005025506228e-05|0.0…	1	1
GO:0038156	CSF2RB IL3RA SYK FCER1G	4	interleukin-3-mediated signaling pathway	Immune Cell Signaling	Proteins: CSF2RB, IL3RA, SYK, FCER1G The primary biological process performed by this system of interacting proteins is immune cell signaling, specifically in the context of hematopoietic cell proliferation, differentiation, and activation. 1. CSF2RB and IL3RA: These two proteins form a heterodimeric receptor complex for interleukin-3 (IL-3), interleukin-5 (IL-5), and granulocyte-macrophage colon…	1	4	0.545876	184	0.984935	histone H3-K9 demethylation	0.235181	8627	0.293679	cell-cell signaling|immune response-inhibiting signal transduction|immune response-regulating signaling pathway|immune response-regulating cell surface receptor signaling pathway|signaling|immune response-activating signaling pathway|intracellular signal transduction|immune response-inhibiting cell surface receptor signaling pathway|immune response-activating cell surface receptor signaling pathw…	0.77056503|0.7688745|0.755569|0.75100625|0.7496487|0.74371386|0.74140394|0.7359995|0.7349907|0.73148715|0.72909224|0.7204877|0.7039801|0.6999253|0.6971816|0.6890667|0.6789285|0.6756813|0.66980684|0.6667792|0.66423756|0.66261387|0.6613248|0.6577801|0.6567785|0.65342337|0.6533463|0.651649|0.6516291|0.6510563|0.6506494|0.6503276|0.6496662|0.6492435|0.64752835|0.647403|0.6471318|0.64355034|0.6435501|…	0.33495017961317836|1.0|0.0035255821376062647|0.0018363855728825414|0.017909675432303443|0.0030959584370799233|0.48745400417816376|1.0|0.001527416815394745|0.04021083269147711|1.0|1.0|0.013324060715145403|0.0006407091521802372|6.069110755919027e-07|0.00986972058421965|0.016924210930697944|0.0365408160732348|0.0017770749405007717|0.00018941907718780533|0.004337473139933572|0.02656354245303119|4.70…	0.3806252041058845|1.0|0.006016351770659155|0.003344964613629401|0.02936012365951384|0.00637028484995869|0.7297215631409637|1.0|0.0035113030238959654|0.07516043493734038|1.0|1.0|0.02741576278836503|0.0018734185736264245|2.8097734981106606e-06|0.022952838567952674|0.039358630071390566|0.0753418888107934|0.004789959408357875|0.0005522422075446219|0.010789734178939234|0.061206319016200904|0.00016608…	1	1
GO:1901620	GLI3 CPLANE2 PRKACA GPR161 GORAB CDK20 TULP3 PRKACB SUFU MKS1	10	regulation of smoothened signaling pathway involved in dorsal/ventral neural tube patterning	Hedgehog Signaling Pathway Regulation	The primary biological process performed by this system of interacting proteins is the regulation of the Hedgehog (Hh) signaling pathway. The Hh pathway is crucial for embryonic development, cell differentiation, and tissue patterning. 1. GLI3: GLI3 is a transcription factor and a key component of the Hh pathway. It acts as both an activator and repressor of Hh target genes, depending on its prot…	1	10	0.699193	3	0.999754	regulation of activation of membrane attack complex	0.322308	4480	0.633208	regulation of smoothened signaling pathway|smoothened signaling pathway|regulation of smoothened signaling pathway involved in dorsal/ventral neural tube patterning|smoothened signaling pathway involved in dorsal/ventral neural tube patterning|positive regulation of smoothened signaling pathway|regulation of hippo signaling|smoothened signaling pathway involved in ventral spinal cord patterning|r…	0.7903507|0.7143229|0.6991932|0.64927095|0.6370282|0.63517654|0.6231081|0.6087136|0.6048679|0.60324335|0.6006818|0.5854811|0.58321387|0.5830313|0.5825044|0.57216156|0.57143205|0.56892693|0.5658713|0.5644878|0.56299436|0.5628007|0.5627084|0.5617125|0.5609342|0.5608629|0.560093|0.5576822|0.5564021|0.5561075|0.5532578|0.553241|0.55098206|0.55021995|0.54999626|0.5473715|0.5472609|0.5465142|0.5415981|…	5.187479225186582e-24|1.4670149198397832e-21|1.657785090693925e-36|1.0941381598491215e-34|0.02137781873655637|1.0|2.855136787817257e-09|1.0|1.0|1.0|7.449640345683298e-18|1.0|1.0|1.0|1.0|1.0|1.0|1.0|1.0|1.0|1.0|9.182881561578363e-07|1.0|1.0|1.0|1.0|1.0|1.0|1.0|1.0|1.0|1.0|1.0|1.0|1.0|8.316178850199717e-08|1.0|1.0|5.9580872026494866e-21|1.0|1.0|1.0|1.0|1.0|1.0|0.014154768121677904|1.0|1.0|1.0|1.0	1.8795214584009352e-23|5.8446809555369846e-21|1.32622807255514e-35|8.481691161621096e-34|0.03431431578901504|1.0|1.0550743664969603e-08|1.0|1.0|1.0|5.283432869278935e-17|1.0|1.0|1.0|1.0|1.0|1.0|1.0|1.0|1.0|1.0|4.136433135846109e-06|1.0|1.0|1.0|1.0|1.0|1.0|1.0|1.0|1.0|1.0|1.0|1.0|1.0|5.133443734691183e-07|1.0|1.0|8.391672116407728e-20|1.0|1.0|1.0|1.0|1.0|1.0|0.04395890721017982|1.0|1.0|1.0|1.0	1	1
GO:1903367	GRP PRKAR1B PENK MEF2C UCN GRPR NPAS2	7	positive regulation of fear response	Neuropeptide Signaling	The primary biological process performed by this system of interacting proteins is neuropeptide signaling. This process involves the transmission of signals between neurons through the release and binding of neuropeptides. 1. GRP and GRPR: Gastrin-releasing peptide (GRP) is a neuropeptide that acts as a neurotransmitter and neuromodulator. GRP binds to its receptor, gastrin-releasing peptide rece…	1	7	0.388151	2575	0.789176	DNA recombination	0.351926	4236	0.653185	neuropeptide signaling pathway|synaptic signaling via neuropeptide|trans-synaptic signaling by neuropeptide|neuronal signal transduction|neuron-glial cell signaling|synaptic signaling by nitric oxide|trans-synaptic signaling by nitric oxide|presynapse to nucleus signaling pathway|synaptic signaling|tachykinin receptor signaling pathway|cyclic-nucleotide-mediated signaling|glial cell-neuron signal…	0.96245635|0.92727107|0.8888701|0.74499893|0.7176299|0.71460944|0.69904906|0.6926842|0.68564105|0.6833608|0.6833069|0.67858315|0.67649853|0.67267|0.66768086|0.6599475|0.6541615|0.6540214|0.64803684|0.6475363|0.64582753|0.64543855|0.6429703|0.64248836|0.6403627|0.6340101|0.6337022|0.6288599|0.6279304|0.62719643|0.62586004|0.62364876|0.62363416|0.6210009|0.62094164|0.6202363|0.6188016|0.6186043|0.6…	5.331021898802235e-08|0.002447551282465539|1.0|1.0|1.0|1.0|1.0|1.0|0.00012292647843347487|1.0|0.034594261818706104|1.0|1.0|1.0|1.0|1.0|1.0|1.0|1.0|1.0|0.00011026805701897118|0.0007617890612550643|1.0|1.0|1.0|1.0|1.0|1.0|1.0|0.05578771388460347|1.0|1.0|1.0|1.0|1.0|1.0|1.0|1.0|1.0|1.0|1.0|1.0|1.0|1.0|1.0|1.0|0.011512161147254507|1.0|1.0|1.0	1.0058531884532518e-07|0.003697207375325587|1.0|1.0|1.0|1.0|1.0|1.0|0.0003234907327196707|1.0|0.06112060391997545|1.0|1.0|1.0|1.0|1.0|1.0|1.0|1.0|1.0|0.0003557034097386167|0.0024260798129142175|1.0|1.0|1.0|1.0|1.0|1.0|1.0|0.13378348653382127|1.0|1.0|1.0|1.0|1.0|1.0|1.0|1.0|1.0|1.0|1.0|1.0|1.0|1.0|1.0|1.0|0.037498896245128685|1.0|1.0|1.0	1	1
GO:0032459	VPS35 ISG15 ABCA3	3	regulation of protein oligomerization	Endosomal Sorting and Immunity Regulation	Proteins: VPS35, ISG15, ABCA3 1. VPS35: Endosomal sorting - VPS35 is a key component of the retromer complex, which is involved in endosomal sorting and trafficking of transmembrane proteins. - The retromer complex plays a crucial role in recycling proteins from endosomes to the trans-Golgi network or plasma membrane, preventing their degradation in lysosomes. - VPS35 dysfunction has been linked …	1	3	0.404406	1885	0.845669	keratan sulfate biosynthetic process	0.313203	6355	0.479695	immune response-inhibiting signal transduction|immune response-regulating cell surface receptor signaling pathway|immune response-inhibiting cell surface receptor signaling pathway|immune response-regulating signaling pathway|integrated stress response signaling|synaptic vesicle endosomal processing|endosome organization|regulation of viral budding via host ESCRT complex|regulation of endosome or…	0.6899638|0.6789632|0.67399544|0.67230785|0.6641959|0.65570813|0.6546086|0.6359153|0.6274942|0.62339556|0.6177132|0.6159378|0.6156307|0.61024094|0.6051179|0.60446715|0.6012094|0.5980525|0.59391785|0.5913333|0.5911275|0.5878724|0.586327|0.58626086|0.5839938|0.58393484|0.58027786|0.5792179|0.5789462|0.578135|0.57196224|0.57188547|0.571869|0.57183367|0.57136345|0.5699636|0.56860626|0.56818175|0.5681…	1.0|1.0|1.0|1.0|1.0|1.0|1.0|1.0|1.0|0.04243239954383935|1.0|1.0|1.0|1.0|1.0|1.0|1.0|1.0|1.0|1.0|1.0|1.0|1.0|1.0|1.0|1.0|1.0|1.0|1.0|1.0|1.0|1.0|0.06285576169539323|1.0|0.3036332335944751|1.0|0.08017591665104105|1.0|1.0|1.0|1.0|1.0|1.0|1.0|1.0|1.0|1.0|1.0|1.0|1.0	1.0|1.0|1.0|1.0|1.0|1.0|1.0|1.0|1.0|0.07887063112237797|1.0|1.0|1.0|1.0|1.0|1.0|1.0|1.0|1.0|1.0|1.0|1.0|1.0|1.0|1.0|1.0|1.0|1.0|1.0|1.0|1.0|1.0|0.14253007187163996|1.0|0.6260479043185053|1.0|0.1922683852542951|1.0|1.0|1.0|1.0|1.0|1.0|1.0|1.0|1.0|1.0|1.0|1.0|1.0	1	1
GO:0048293	TNFSF4 CLCF1 STAT6 NDFIP1 BCL6 FOXP3 IL4	7	regulation of isotype switching to IgE isotypes	Th2 Cell Differentiation	Proteins: TNFSF4, CLCF1, STAT6, NDFIP1, BCL6, FOXP3, IL4 1. IL4 signaling: IL4 is a cytokine that plays a crucial role in Th2 cell differentiation. It binds to its receptor, leading to the activation of STAT6, which then translocates to the nucleus and promotes Th2-specific gene expression. 2. STAT6 activation: STAT6 is a transcription factor activated by IL4 signaling. Its activation is essentia…	1	7	0.426194	561	0.954069	exit from host cell	0.362283	1511	0.87629	T-helper 2 cell differentiation|T-helper cell differentiation|T-helper 2 cell cytokine production|T-helper 1 cell differentiation|T follicular helper cell differentiation|T-helper 17 cell differentiation|interleukin-4 production|CD4-positive, alpha-beta T cell differentiation involved in immune response|T-helper 2 cell activation|T-helper cell lineage commitment|CD4-positive, alpha-beta T cell di…	0.8553357|0.7760749|0.77329266|0.74675405|0.7420182|0.7295023|0.7125835|0.712234|0.7055971|0.70370626|0.6952138|0.69394207|0.69384134|0.6880937|0.6866489|0.68529767|0.6817428|0.6790668|0.67660695|0.6724578|0.66719043|0.66648453|0.66290516|0.6610164|0.6593765|0.6572321|0.64488393|0.64442575|0.6418328|0.63897145|0.6348002|0.6340007|0.63321865|0.6322176|0.6314213|0.63002|0.62447333|0.62397784|0.6230…	1.8922647504781615e-08|1.6338629375026537e-11|0.005296536423431313|2.989606558550604e-05|1.0|5.770917317154304e-05|2.4803718722348986e-07|1.9009399023721572e-11|0.0008164217068279961|0.007327253283090567|6.238921279369384e-11|3.5677045138629105e-11|1.0|0.004076397961982039|1.0|2.04696638187792e-11|8.515795889863931e-13|2.5843407547890574e-10|1.0|1.0|0.007732969942475217|0.0028549768697590954|0.00…	3.7030621340081436e-08|4.551150243739983e-11|0.00872576017039755|6.5995729769329e-05|1.0|0.00014536315660338298|7.824516947113244e-07|8.719907809046593e-11|0.001943861206733324|0.01593808620247231|3.232601699155121e-10|1.9711074662226025e-10|1.0|0.010452302466620612|1.0|1.3738029408576645e-10|6.126471863211461e-12|1.6673166159929403e-09|1.0|1.0|0.01828125281909035|0.00804218836551858|0.0046769972…	1	1
GO:0070782	XKR6 XKR5 XKR4 XKR7 FASLG PLSCR1 XKR8 XKR9 TRPC5	9	phosphatidylserine exposure on apoptotic cell surface	Apoptosis Regulation	Proteins: XKR6, XKR5, XKR4, XKR7, FASLG, PLSCR1, XKR8, XKR9, TRPC5. 1. XKR family involvement in apoptosis: - XKR4, XKR5, XKR6, XKR7, XKR8, and XKR9 belong to the XK-related protein family. - XKR proteins are known to regulate apoptosis, a programmed cell death process. - XKR proteins interact with phosphatidylserine (PS), a phospholipid that plays a role in apoptosis signaling. 2. FASLG role in …	1	9	0.426664	1110	0.909121	blood vessel endothelial cell proliferation involved in sprouting angiogenesis	0.282805	8087	0.337891	regulation of apoptotic process|regulation of apoptotic signaling pathway|apoptotic process|apoptotic signaling pathway|regulation of apoptotic cell clearance|regulation of cell death|regulation of lymphocyte apoptotic process|positive regulation of apoptotic process|regulation of programmed cell death|regulation of apoptotic process involved in development|negative regulation of apoptotic proces…	0.9274744|0.8377937|0.8367342|0.82713234|0.8037683|0.7860017|0.7749716|0.7746077|0.7717397|0.7696558|0.7563567|0.74908483|0.74601734|0.7427306|0.7383429|0.73473775|0.73082745|0.7264966|0.7228371|0.7193481|0.7186685|0.7146321|0.7146021|0.7120217|0.71075934|0.70464575|0.70152247|0.69884217|0.6943325|0.69175744|0.6895671|0.6871257|0.6868721|0.6858962|0.68362105|0.68351126|0.6827101|0.6823702|0.68204…	0.5506995234666784|1.0|2.4552221310275985e-09|0.26998984512105567|1.0|0.5957408305516514|1.0|0.23472134768246505|0.5583757996326494|1.0|1.0|1.0|1.0|1.0|1.0|1.0|0.10691138621257724|1.0|1.0|1.0|1.0|1.0|1.0|1.0|5.432815859860124e-14|1.0|1.0|1.0|1.0|1.0|1.0|1.0659774955028629e-14|1.0|1.0|1.0|1.0|1.0|0.053299261629049285|1.0|1.0|1.0|1.0|6.587778495460627e-22|1.0|1.0|1.0|1.0|0.15555131874500383|1.0|0.0…	0.6243758769463473|1.0|7.285525611357859e-09|0.3703564404952753|1.0|0.8972000460115231|1.0|0.35402918202483413|0.9229352060043792|1.0|1.0|1.0|1.0|1.0|1.0|1.0|0.20840426162295758|1.0|1.0|1.0|1.0|1.0|1.0|1.0|3.8805827570429454e-13|1.0|1.0|1.0|1.0|1.0|1.0|1.1220815742135398e-13|1.0|1.0|1.0|1.0|1.0|0.119773621638313|1.0|1.0|1.0|1.0|9.024354103370722e-21|1.0|1.0|1.0|1.0|0.3766375756537623|1.0|0.078989…	1	1
GO:0071484	AKT2 RGS9 GNB5 SLC24A4 TENT2	5	cellular response to light intensity	Phototransduction Cascade Regulation	Proteins: AKT2, RGS9, GNB5, SLC24A4, TENT2 1. AKT2: AKT2 is a serine/threonine kinase involved in the regulation of glucose metabolism, cell survival, and proliferation. It is activated by phosphoinositide 3-kinase (PI3K) signaling, which is crucial for cellular responses to growth factors and insulin. AKT2's role in this system may be to modulate the activity of other interacting proteins, ensur…	1	5	0.646371	12	0.999018	positive regulation of phospholipase A2 activity	0.199933	10509	0.139594	phototransduction|blue light signaling pathway|phototransduction, visible light|regulation of rhodopsin mediated signaling pathway|cellular response to light stimulus|regulation of tetrapyrrole metabolic process|response to light stimulus|adaptation of rhodopsin mediated signaling|rhodopsin mediated signaling pathway|light adaption|response to light intensity|cellular response to light intensity|…	0.82909125|0.7484802|0.7333072|0.7023791|0.6815158|0.68002325|0.6726856|0.6659604|0.6575008|0.64909863|0.6481967|0.64637125|0.6406082|0.6328204|0.6254642|0.6179911|0.60146356|0.6006749|0.59720016|0.5944198|0.590603|0.586825|0.58630633|0.58503425|0.58463025|0.5839187|0.58300745|0.58163166|0.58142877|0.5810685|0.5739224|0.5726371|0.57210267|0.5703272|0.5687949|0.56428665|0.5641928|0.5640302|0.56377…	0.01421008152366431|1.0|1.0|1.0|2.060520584164436e-11|1.0|2.411405499218391e-09|1.0|1.0|4.081598264845373e-07|6.944269796688093e-16|8.104890052240948e-20|1.0|1.0|1.0|4.081598264845373e-07|1.0|0.019963479626493943|1.0|0.06364760380433411|1.0|6.804251350627095e-08|1.0|1.0|1.0|1.0|1.0|1.1907340635837163e-11|1.0|1.0|1.0|1.0|1.0|1.0|1.0|1.0|1.0|1.0|1.0|0.3110467967822057|1.0|1.0|1.0|1.0|1.0|0.58282094…	0.017371737803990598|1.0|1.0|1.0|8.048908531892329e-11|1.0|9.031481270480865e-09|1.0|1.0|1.4026110875757296e-06|4.451454997876983e-15|6.754075043534124e-19|1.0|1.0|1.0|1.8140436732646102e-06|1.0|0.04486175196964931|1.0|0.1205447041748752|1.0|3.419221784234721e-07|1.0|1.0|1.0|1.0|1.0|9.525731444012726e-11|1.0|1.0|1.0|1.0|1.0|1.0|1.0|1.0|1.0|1.0|1.0|0.6196151330322823|1.0|1.0|1.0|1.0|1.0|1.0|1.0|1.…	1	1
GO:0034499	SGSM2 GCC2 SNX3 SNX12 RAB7B	5	late endosome to Golgi transport	Endosomal Trafficking	The primary biological process performed by this system of interacting proteins is endosomal trafficking. This process is crucial for the proper sorting and distribution of cellular components, including proteins and lipids, within the cell. 1. SGSM2: Small G protein signaling modulator 2 (SGSM2) is involved in the regulation of small GTPases, such as RAB7B. It plays a role in endosomal trafficki…	1	5	0.724073	21	0.998281	hypothalamic tangential migration using cell-axon interactions	0.389475	2851	0.766579	endosomal transport|endosome to lysosome transport|endosome to plasma membrane protein transport|early endosome to recycling endosome transport|vesicle-mediated transport between endosomal compartments|Golgi to endosome transport|early endosome to late endosome transport|plasma membrane to endosome transport|early endosome to Golgi transport|endosomal vesicle fusion|endosome organization|endocyti…	0.9599377|0.8778087|0.8123641|0.8040211|0.8036819|0.7943757|0.78319955|0.7810807|0.77899265|0.77538466|0.77246505|0.76946235|0.7628855|0.758745|0.7579422|0.75638866|0.7512028|0.74659276|0.7313975|0.7294357|0.7240732|0.7229376|0.7197394|0.7179096|0.71389216|0.70937777|0.7026923|0.6955759|0.69511133|0.6912462|0.6905345|0.6866047|0.68652546|0.6818571|0.68155974|0.67763644|0.67602754|0.6754572|0.6746…	5.840883433187594e-10|0.02168425034842678|1.0|1.0|6.702477862619047e-05|1.0|5.831167781519065e-05|1.0|1.0|1.0|0.027687923285935265|0.00022936820610879044|0.000544964165260883|0.0005831923832887411|1.0|1.0|4.954038182545869e-12|1.0|1.0|0.16038415073710086|8.104890052240948e-20|1.0|1.0|1.0|1.0|1.0|1.0|1.1612209534710412e-05|1.0|1.0|1.0|0.0008602428265866806|1.0|6.360976408235993e-06|1.0|1.0|1.0|6.1…	1.2374753036414394e-09|0.029106376306613127|1.0|1.0|0.0001492756762275957|1.0|0.000141190503184481|1.0|1.0|1.0|0.05025031449353042|0.0006867311560143426|0.0014455282898166659|0.0017254212523335533|1.0|1.0|3.281231888850995e-11|1.0|1.0|0.2884500690781272|7.236508975215132e-19|1.0|1.0|1.0|1.0|1.0|1.0|5.0052627304786256e-05|1.0|1.0|1.0|0.0029160773782599342|1.0|2.8653046883945915e-05|1.0|1.0|1.0|3.1…	1	1
GO:2000367	ZP3 STXBP1 HYAL3	3	regulation of acrosomal vesicle exocytosis	Fertilization and Vesicle Trafficking	Protein Interaction Analysis: 1. ZP3 (Zona Pellucida Glycoprotein 3) - Role: Essential for sperm binding and acrosome reaction during fertilization. - Reasoning: ZP3 is a glycoprotein component of the zona pellucida, the extracellular matrix surrounding the oocyte. It plays a crucial role in species-specific sperm recognition and binding, initiating the acrosome reaction required for sperm penetr…	1	3	0.587106	50	0.995906	caveolin-mediated endocytosis	0.504128	318	0.973964	fertilization|regulation of fertilization|fusion of sperm to egg plasma membrane involved in single fertilization|acrosomal vesicle exocytosis|vesicle docking|sperm-egg recognition|vesicle cytoskeletal trafficking|vesicle fusion|vesicle-mediated transport|vesicle targeting|vesicle tethering|positive regulation of fertilization|vesicle fusion to plasma membrane|sperm capacitation|intralumenal vesi…	0.7524135|0.7191329|0.6930008|0.6838816|0.68326974|0.6793784|0.66815126|0.6646135|0.66435766|0.65820086|0.65728915|0.65029967|0.6468488|0.6444714|0.64085484|0.6380928|0.63763785|0.63206816|0.6239663|0.62377083|0.6229738|0.6220882|0.62112176|0.62012666|0.6190191|0.61450624|0.61028683|0.60247195|0.60171735|0.6012616|0.60079825|0.59885585|0.5987409|0.59829974|0.59802973|0.5975454|0.5967923|0.5965876…	1.6357125738905432e-06|1.0|1.0|1.000216613416276e-10|0.011678459001099073|0.009245739889022588|1.0|0.02136951315970039|0.000749081697440492|1.0|1.0|1.0|0.004368332105814475|1.0|1.0|1.0|1.0|1.0|1.0|1.269322511776177e-08|1.0|1.0|1.0|1.0|0.06235294197381171|1.0|0.03219598683589738|0.027565900445524805|1.0|0.0005248731461074725|1.0|1.0|1.0|0.008027884750682964|1.0|1.0|1.0|1.0|1.0|1.0|1.0|0.0015740683…	2.8008776950180535e-06|1.0|1.0|3.4137085782125464e-10|0.019727126691045732|0.017346603919366956|1.0|0.037822147185310434|0.0017920614771303638|1.0|1.0|1.0|0.00981647664227972|1.0|1.0|1.0|1.0|1.0|1.0|6.222169175373418e-08|1.0|1.0|1.0|1.0|0.1335180770317167|1.0|0.07760509087407944|0.06581907610261024|1.0|0.002026537243658195|1.0|1.0|1.0|0.02205462843594221|1.0|1.0|1.0|1.0|1.0|1.0|1.0|0.005317798616…	1	1
GO:1990001	NOL3 BCL2L12 XIAP	3	inhibition of cysteine-type endopeptidase activity involved in apoptotic process	Apoptosis Regulation	Protein Interactions: 1. NOL3 (Nucleolar Protein 3) - BCL2L12 (BCL2-Like 12) 2. NOL3 - XIAP (X-linked Inhibitor of Apoptosis Protein) 3. BCL2L12 - XIAP Analysis: 1. NOL3-BCL2L12 Interaction: - NOL3 is an anti-apoptotic protein that inhibits apoptosis by binding to and inhibiting BCL2L12. - BCL2L12 is a pro-apoptotic protein that promotes apoptosis by binding to and inhibiting anti-apoptotic prote…	1	3	0.498968	322	0.973637	positive regulation of vascular endothelial cell proliferation	0.20004	10925	0.105535	regulation of apoptotic process|regulation of apoptotic signaling pathway|apoptotic process|apoptotic signaling pathway|regulation of apoptotic cell clearance|regulation of cell death|regulation of lymphocyte apoptotic process|positive regulation of apoptotic process|regulation of programmed cell death|regulation of apoptotic process involved in development|negative regulation of apoptotic proces…	0.9274744|0.8377937|0.8367342|0.82713234|0.8037683|0.7860017|0.7749716|0.7746077|0.7717397|0.7696558|0.7563567|0.74908483|0.74601734|0.7427306|0.7383429|0.73473775|0.73082745|0.7264966|0.7228371|0.7193481|0.7186685|0.7146321|0.7146021|0.7120217|0.71075934|0.70464575|0.70152247|0.69884217|0.6943325|0.69175744|0.6895671|0.6871257|0.6868721|0.6858962|0.68362105|0.68351126|0.6827101|0.6823702|0.68204…	0.0006138213331445215|0.0013296040310136457|0.0013547694643454868|0.0034541041266453383|1.0|0.0008753765534195825|1.0|1.0|0.0006525236195078021|1.0|0.00013849491716866487|1.0|1.0|1.0|1.0|1.0|1.0|1.0|1.0|1.0|1.0|1.0|1.0|0.03953944801404185|1.0|1.0|1.0|1.0|1.0|1.0|1.0|1.0|1.0|1.0|1.0|1.0|1.0|1.0|0.01808861141108759|0.007853824017733166|0.0075056414704645705|1.0|1.0|0.011852072107337257|0.0284244355…	0.0008572923647269853|0.0020550294142405653|0.002467703942341506|0.0060704817691482225|1.0|0.0019583368085449274|1.0|1.0|0.0015685663930476012|1.0|0.0003815286974343385|1.0|1.0|1.0|1.0|1.0|1.0|1.0|1.0|1.0|1.0|1.0|1.0|0.08786544003120411|1.0|1.0|1.0|1.0|1.0|1.0|1.0|1.0|1.0|1.0|1.0|1.0|1.0|1.0|0.04996853980963423|0.022633498610182035|0.023903316784919013|1.0|1.0|0.03835622041209468|0.07402196746620…	1	1
GO:0043465	ACTN3 TP53 CAVIN3 SLC25A12 TIGAR	5	regulation of fermentation	Regulation of Cellular Metabolism and Energy Homeostasis	The system of interacting proteins, including ACTN3, TP53, CAVIN3, SLC25A12, and TIGAR, primarily contributes to the regulation of cellular metabolism and energy homeostasis. 1. ACTN3: Alpha-actinin-3 (ACTN3) is a structural protein found in fast-twitch muscle fibers. It plays a crucial role in muscle contraction and force generation. ACTN3 deficiency has been associated with reduced muscle stren…	1	5	0.567	133	0.989111	negative regulation of defense response	0.203436	9283	0.239971	regulation of cellular metabolic process|regulation of metabolic process|energy homeostasis|regulation of generation of precursor metabolites and energy|regulation of glucose metabolic process|energy reserve metabolic process|regulation of cellular carbohydrate metabolic process|regulation of hormone metabolic process|cellular glucose homeostasis|regulation of primary metabolic process|regulation…	0.85235506|0.82150805|0.8027544|0.77165663|0.7669504|0.7583042|0.7429217|0.74180377|0.7349814|0.7272831|0.7268785|0.7262573|0.7215534|0.7190884|0.7019143|0.6945282|0.68956745|0.682719|0.6826908|0.6825118|0.6814201|0.678437|0.6740513|0.6717583|0.67122144|0.66985536|0.6682762|0.6670842|0.6645205|0.6635577|0.6619388|0.6596172|0.65581554|0.6500978|0.6495371|0.64313114|0.640858|0.6374774|0.63580835|0.…	0.003411598667914808|0.008619761415924004|1.0|2.319974332594018e-11|6.358175021252192e-09|1.0|2.7954979387744556e-08|1.0|1.0|0.046113043487224205|1.0|5.959277267919267e-08|0.24429098412360312|0.05020445356243701|0.013633258879278973|0.11283936627245586|6.765208269461891e-07|1.0|1.0|1.0|0.0319525483513065|1.0|1.0|1.0|1.0|0.06530672406184039|0.009896170052331526|1.0|1.0|0.004342849336630987|0.55040…	0.004453784161768679|0.012209293790260629|1.0|8.405704103601513e-11|2.1336157789436884e-08|1.0|9.540948596499849e-08|1.0|1.0|0.08539452497634112|1.0|2.60230448380754e-07|0.41759142585231307|0.10372820983974589|0.031631691135218035|0.2074253056478968|2.891114645069184e-06|1.0|1.0|1.0|0.06534263466524848|1.0|1.0|1.0|1.0|0.13806918406308752|0.026111266628843076|1.0|1.0|0.014428070885817233|1.0|1.0|0…	1	1
GO:0072584	NEDD4L MAPK3 PROM2 PACSIN2 CLN3 CAV1 MAPK1 SRC CAV3 UNC119 MLC1	11	caveolin-mediated endocytosis	MAPK Signaling Pathway	The most prominent biological process performed by this system of interacting proteins is the Mitogen-Activated Protein Kinase (MAPK) signaling pathway. This pathway is crucial for regulating various cellular processes, including cell proliferation, differentiation, and apoptosis. 1. Central role of MAPK1 and MAPK3: Both MAPK1 (ERK2) and MAPK3 (ERK1) are key components of the MAPK signaling pathw…	1	11	0.190881	9636	0.211069	response to auditory stimulus	0.298753	3403	0.721385	MAPK cascade|stress-activated MAPK cascade|JNK cascade|p38MAPK cascade|stress-activated protein kinase signaling cascade|ERK1 and ERK2 cascade|regulation of MAPK cascade|positive regulation of MAPK cascade|non-canonical Wnt signaling pathway via MAPK cascade|ERK5 cascade|regulation of stress-activated MAPK cascade|regulation of p38MAPK cascade|regulation of stress-activated protein kinase signali…	0.94202155|0.8529843|0.81784546|0.80999976|0.7959548|0.7912729|0.78041935|0.7468797|0.7461207|0.7421661|0.7097899|0.6875761|0.6851226|0.673497|0.66352135|0.65450376|0.65268403|0.64951754|0.6448957|0.6395308|0.63862014|0.63840824|0.63632965|0.635561|0.6342374|0.627942|0.62522393|0.619379|0.6154262|0.6101649|0.6083514|0.6068614|0.60258687|0.6004625|0.6001463|0.59989774|0.59573954|0.5954975|0.590653…	6.686622129838567e-05|0.000401383404504301|1.0|0.03411498507874029|0.0004421708988617653|0.0010213868566048862|3.558594471804854e-05|0.037233482416651094|1.0|1.0|0.0002235040645053818|0.027252698366540297|0.00023378741084610573|1.0|1.0|0.011491458695618425|1.0|0.0048961405706110525|1.0|0.00020066565676501264|1.0|1.0|1.0|2.9078053299972707e-05|0.015506813485711519|1.0|1.0|0.006291417848443287|1.0|…	0.00010100637658366414|0.0006547853254556296|1.0|0.0513779895764161|0.0008987213391499295|0.002227846103419816|8.963714034772931e-05|0.06242614858939951|1.0|1.0|0.0005960108386810181|0.056307228030041935|0.0006530374604639825|1.0|1.0|0.026417146426709025|1.0|0.012717248235353383|1.0|0.0005833303975727113|1.0|1.0|1.0|0.0001101441412877754|0.03791396940271765|1.0|1.0|0.017524840803463195|1.0|1.0|1.…	1	1
GO:0010496	GJB2 EPHB2 MIP GJA8 GJA3 GJB4 CLDN16 GJB6 PEG10 ARC	10	intercellular transport	Gap Junction Communication	The primary biological process performed by this system of interacting proteins is gap junction communication. This is supported by the presence of several connexin and claudin proteins, which are known to form gap junctions and tight junctions, respectively. 1. Connexin proteins: GJB2, GJA8, GJA3, GJB4, and GJB6 are all members of the connexin family. Connexins are integral membrane proteins tha…	1	10	0.596717	42	0.996561	membrane docking	0.557056	80	0.99345	gap junction-mediated intercellular transport|gap junction assembly|cell communication by electrical coupling|cell communication involved in cardiac conduction|cell communication by electrical coupling involved in cardiac conduction|cell communication|positive regulation of cell communication by electrical coupling|regulation of cell communication by electrical coupling|positive regulation of gap…	0.9278519|0.892552|0.7604724|0.73637813|0.71979594|0.7063326|0.70276785|0.6991074|0.6935446|0.6900926|0.68571687|0.67705655|0.6733668|0.6721452|0.6655434|0.6633247|0.6584887|0.6557414|0.65394235|0.652871|0.6527227|0.6518885|0.64646137|0.64130676|0.6390259|0.63306355|0.63040936|0.6295978|0.62237334|0.620755|0.61728007|0.6166512|0.6165029|0.6153194|0.61530113|0.6117376|0.60930485|0.60527295|0.60497…	5.9580872026494866e-21|4.661461213305453e-05|0.0001700713359863348|1.0|1.0|0.007450537670337646|1.0|1.0|1.0|1.0|1.0|1.0|1.0|1.0|1.0|0.2612914544819963|1.0|1.0|1.0|1.0|0.31216235642258505|0.037624960866490954|1.0|1.0|1.0|1.0|1.0|1.0|1.0|1.0|1.0|1.1047290510062018e-06|2.9097425775945086e-05|1.0|7.73889559510387e-05|4.095049387635283e-06|1.0|1.0|1.0|1.0|1.0|1.657785090693925e-36|0.037844904427073646…	1.9598971061346995e-20|8.149407715568974e-05|0.00034248466883155123|1.0|1.0|0.014164520285813014|1.0|1.0|1.0|1.0|1.0|1.0|1.0|1.0|1.0|0.4649314136690325|1.0|1.0|1.0|1.0|0.5515235979197616|0.08324106386391804|1.0|1.0|1.0|1.0|1.0|1.0|1.0|1.0|1.0|5.845127254001067e-06|0.00012651054685193516|1.0|0.0003184730697573609|2.121787247479421e-05|1.0|1.0|1.0|1.0|1.0|4.875838502040955e-35|0.09605305692150672|1…	1	1
GO:0072110	BMP4 ITGB3 SERPINB7 BMP7 PDGFRB PDGFD IL6R WT1 EGR1 PDGFA CFLAR PDGFB	12	glomerular mesangial cell proliferation	Platelet-Derived Growth Factor Signaling	The most prominent biological process performed by this system of interacting proteins is Platelet-Derived Growth Factor (PDGF) signaling. This process is crucial for cell proliferation, migration, and differentiation, particularly in the context of wound healing and angiogenesis. 1. Central role of PDGF family proteins: PDGFA, PDGFB, and PDGFD are all members of the PDGF family, which are known …	1	12	0.350345	2409	0.802767	regulation of phospholipid translocation	0.351735	2355	0.807188	platelet-derived growth factor receptor signaling pathway|platelet-derived growth factor receptor-alpha signaling pathway|platelet-derived growth factor receptor-beta signaling pathway|regulation of platelet-derived growth factor receptor signaling pathway|positive regulation of platelet-derived growth factor receptor signaling pathway|cellular response to platelet-derived growth factor stimulus|…	0.95020473|0.8878336|0.853271|0.7865466|0.7761129|0.77222276|0.7416404|0.73228145|0.73042405|0.72446394|0.7058165|0.68477225|0.6769545|0.66309714|0.66214955|0.65798455|0.6563072|0.6559762|0.6464753|0.64182055|0.6394275|0.6323693|0.6321499|0.62537026|0.62488425|0.6196762|0.61842227|0.6158349|0.6149898|0.6149627|0.6119343|0.6116134|0.6034264|0.60080665|0.6003177|0.5998105|0.59914446|0.59885764|0.59…	2.409726730841808e-10|0.0048899660480526365|9.494173148863485e-08|1.0|1.0|9.99338610769023e-10|1.450586332336865e-09|1.0|0.0020983905530266296|1.0|1.0|0.029693934152439126|1.0|1.0|0.036482626646546876|1.0|1.0|0.12520777824640733|1.0|1.0|1.0|1.0|0.0020983905530266296|1.0|1.0|1.0|1.0|0.024915791949042643|1.0|1.0|2.0037495667660913e-06|1.0|4.443131564706061e-06|1.0|1.0|1.0|1.0|2.619614939884186e-10|…	5.261412076073816e-10|0.0071178545095380436|2.572946652808533e-07|1.0|1.0|3.903666448316496e-09|5.579178201295635e-09|1.0|0.004694386024668075|1.0|1.0|0.060476444302320014|1.0|1.0|0.07648349401791799|1.0|1.0|0.23624109103095722|1.0|1.0|1.0|1.0|0.005910959304300366|1.0|1.0|1.0|1.0|0.060183072340682715|1.0|1.0|9.587318501273164e-06|1.0|2.1995700815376538e-05|1.0|1.0|1.0|1.0|2.062688929042666e-09|1.…	1	1
GO:0001796	FCGR2B HLA-E FCGR1A C3	4	regulation of type IIa hypersensitivity	Immune Response Regulation	Proteins: FCGR2B, HLA-E, FCGR1A, C3 1. FCGR2B: Inhibitory receptor in immune response - FCGR2B is an Fc gamma receptor that negatively regulates immune cell activation. - It binds to the Fc region of immunoglobulins, leading to the inhibition of immune cell activation and preventing excessive immune responses. 2. HLA-E: Modulation of NK cell activity - HLA-E is a non-classical major histocompatib…	1	4	0.570812	131	0.989275	regulation of CD8-positive, alpha-beta T cell differentiation	0.346145	3308	0.729163	regulation of immune response|regulation of immune system process|regulation of tolerance induction dependent upon immune response|immune response|regulation of adaptive immune response|regulation of immunoglobulin mediated immune response|regulation of inflammatory response to antigenic stimulus|negative regulation of immune response|tolerance induction dependent upon immune response|regulation …	0.9719341|0.8738882|0.8521298|0.8474562|0.83328724|0.826515|0.80373853|0.80076635|0.7768944|0.7730937|0.76899165|0.7522316|0.7469813|0.74372804|0.74073744|0.73589945|0.735741|0.73330474|0.7317555|0.72800374|0.7255094|0.71972114|0.7192346|0.7187544|0.7186443|0.71170175|0.70486116|0.7026454|0.69946605|0.69635475|0.69339466|0.691874|0.6830628|0.6804805|0.68034935|0.6784929|0.6778301|0.6768496|0.6758…	5.5075571150250425e-06|4.634611139376513e-05|1.0|8.633114712743628e-05|1.622919264977667e-08|1.6550661672633573e-10|3.4289695668071734e-11|0.0006776472056362344|1.0|2.2772021400126289e-07|2.11145515507759e-06|2.2289448351037683e-07|0.002664663435141144|0.00038634772078160773|1.0|1.0|3.50093319360035e-14|0.0035255821376062647|3.745730112277973e-08|1.0981843939415598e-08|1.0|4.684318631668551e-07|0…	9.073405461326265e-06|8.126834875867306e-05|1.0|0.0001823655570435998|5.201664310825856e-08|6.867494469972438e-10|1.5376545142633064e-10|0.0014992194814960936|1.0|8.046650671422718e-07|7.280879845095138e-06|9.210515847536233e-07|0.006196891709630567|0.0011778893926268528|1.0|1.0|2.735104057500274e-13|0.009401552366950039|1.9407928042891052e-07|5.463603949958009e-08|1.0|2.2095842602210147e-06|0.01…	1	1
GO:0070086	LRSAM1 NEURL1B IL10RA TSG101 VPS28	5	ubiquitin-dependent endocytosis	Endosomal Sorting Complex Required for Transport (ESCRT) Regulation	Proteins LRSAM1, NEURL1B, IL10RA, TSG101, and VPS28 interact to regulate the ESCRT pathway, which is crucial for various cellular processes, including endosomal sorting, membrane remodeling, and viral budding. 1. LRSAM1: LRSAM1 is an E3 ubiquitin ligase that plays a role in protein ubiquitination. It has been implicated in the regulation of endosomal trafficking and autophagy. LRSAM1's involvemen…	1	5	0.356125	3173	0.740216	astrocyte activation involved in immune response	0.277718	7067	0.421402	regulation of viral budding via host ESCRT complex|ESCRT III complex disassembly|ESCRT complex disassembly|viral budding via host ESCRT complex|regulation of exosomal secretion|positive regulation of viral budding via host ESCRT complex|endosome transport via multivesicular body sorting pathway|regulation of retrograde trans-synaptic signaling by endocanabinoid|regulation of endosome size|regulat…	0.79439265|0.7207181|0.71913373|0.6852523|0.6399127|0.6234634|0.6075579|0.60713255|0.60710776|0.60407794|0.599161|0.5977246|0.59585315|0.5927899|0.59044474|0.59016204|0.5885391|0.58511317|0.58405817|0.58277535|0.5791482|0.5760932|0.5732883|0.5720098|0.5644207|0.560852|0.5587803|0.5585964|0.55820405|0.55737484|0.5516391|0.55096155|0.5488501|0.5486387|0.5484315|0.5482769|0.5479232|0.547723|0.546922…	0.0011661126441566568|1.0|1.0|1.87315770865916e-05|0.005819689748137479|0.000874686523044866|5.554141840207156e-05|1.0|1.0|1.0|1.0|1.0|1.0|1.0|1.0|1.0|1.0|1.0|1.0|1.0|1.0|1.935705848034342e-05|0.00030688504530354034|2.2051961005444672e-05|1.0|1.0|1.0|0.0017487608777967997|1.0|0.05837817346651732|1.0|1.0|1.0|1.0|7.958011663498434e-05|1.0|1.0|1.0|1.0|4.513154904265883e-05|1.0|0.25472403903494717|1.…	0.0015908767314551935|1.0|1.0|4.190509415344877e-05|0.010247125979873378|0.0019583368085449274|0.000135137271051269|1.0|1.0|1.0|1.0|1.0|1.0|1.0|1.0|1.0|1.0|1.0|1.0|1.0|1.0|7.531929369783431e-05|0.000977340908610001|8.416779009711707e-05|1.0|1.0|1.0|0.005534376095810909|1.0|0.1386654951698749|1.0|1.0|1.0|1.0|0.00032614801899583746|1.0|1.0|1.0|1.0|0.00017980696829744553|1.0|0.5241235371089448|1.0|0…	1	1
GO:0021856	SEMA3E NDNF NRP2 PLXNA1 PLXNA3 NRP1	6	hypothalamic tangential migration using cell-axon interactions	Axonal Guidance	Proteins: SEMA3E, NDNF, NRP2, PLXNA1, PLXNA3, NRP1 1. SEMA3E: Semaphorin 3E is a secreted protein that plays a crucial role in axonal guidance by repelling axons from inappropriate regions during neural development. It interacts with NRP2 and PLXNA1 to mediate its repulsive effects on axons. 2. NDNF: Neuron-derived neurotrophic factor is a secreted protein that promotes the survival and different…	1	6	0.546186	210	0.982807	positive regulation of icosanoid secretion	0.144479	11763	0.0369248	axon guidance|regulation of axon guidance|anterior/posterior axon guidance|axon extension involved in axon guidance|neuron projection guidance|positive regulation of axon guidance|dorsal/ventral axon guidance|axonogenesis|axonal transport|motor neuron axon guidance|axon development|regulation of axonogenesis|anterograde axonal transport|interneuron axon guidance|chemoattraction of axon|regulation…	0.96354395|0.85946983|0.8552217|0.8529097|0.8192867|0.8089547|0.8051903|0.8032866|0.79946077|0.79676867|0.78988385|0.7886106|0.7841482|0.7810459|0.7804274|0.77773464|0.7721057|0.7667643|0.7594206|0.759076|0.7588582|0.7550069|0.7470416|0.7469829|0.7414752|0.73481977|0.73317075|0.7295442|0.7293819|0.72889996|0.7270304|0.72193104|0.71539134|0.7101563|0.70694804|0.7057489|0.70529044|0.7045816|0.70419…	2.9953733180772646e-09|0.004192744093874505|1.0|3.066689233086353e-10|3.0589542225544184e-09|0.0013992127344388942|1.0|6.615316468035245e-08|1.0|5.038783763925443e-05|1.1175880789319928e-07|1.0266954756644307e-07|1.0|1.0|1.0|1.419280096706375e-07|3.7418620118013015e-08|3.061436814107615e-07|1.0|1.0|1.0|0.0038439092307954973|3.154246138164008e-06|1.0|1.0|0.002447551282457417|1.0|0.0027967935913899…	6.1130067715862545e-09|0.006166518600859392|1.0|1.0054718797004437e-09|1.054811800880834e-08|0.0030026024344182276|1.0|2.289036840150604e-07|1.0|0.0001447926368944093|4.3317367400464835e-07|4.3504045579001304e-07|1.0|1.0|1.0|6.694717437294222e-07|1.8803326692468852e-07|1.417331858383155e-06|1.0|1.0|1.0|0.01064794800774376|1.2927238271163969e-05|1.0|1.0|0.0067987535623817135|1.0|0.0085268097298472…	1	1
GO:0071163	CDC45 CDT1 GMNN	3	DNA replication preinitiation complex assembly	DNA Replication Initiation	Proteins: CDC45, CDT1, GMNN 1. CDC45: Cell Division Cycle 45 (CDC45) is a crucial component of the CMG (CDC45-MCM-GINS) helicase complex, which unwinds DNA during replication. CDC45 is essential for the initiation and elongation stages of DNA replication, as it helps recruit other replication factors to the replication fork. 2. CDT1: CDT1 (Chromatin Licensing and DNA Replication Factor 1) is invo…	1	3	0.732707	17	0.998608	positive regulation of respiratory gaseous exchange	0.243884	8535	0.301212	DNA replication initiation|nuclear cell cycle DNA replication initiation|mitotic DNA replication initiation|DNA replication|DNA-templated DNA replication|positive regulation of DNA-templated DNA replication initiation|regulation of DNA-templated DNA replication initiation|cell cycle DNA replication|nuclear DNA replication|positive regulation of DNA replication|regulation of DNA replication|positi…	0.9999999|0.9333946|0.85450506|0.8533559|0.8408979|0.83499587|0.822826|0.8098676|0.8085566|0.788296|0.78022003|0.77621835|0.7721916|0.7430359|0.74211967|0.7408903|0.7327073|0.7220427|0.7190242|0.7175865|0.71289355|0.71222043|0.70419455|0.6950775|0.6941097|0.69222254|0.6897358|0.6819838|0.67873466|0.6744871|0.6737001|0.6671852|0.6647588|0.66426355|0.663869|0.6626036|0.65683365|0.6535133|0.6491082|…	1.0045032560363248e-08|1.0|1.0|4.497978873417562e-06|8.753443321651213e-07|1.0|2.1422556074365297e-06|1.577008193836543e-08|1.0882118607082665e-08|0.0071573774722552205|0.0001891668576808205|0.002447836660973509|1.0|3.366879986617041e-05|1.0|1.0|1.1907340635837106e-12|1.0|0.0038448052977637726|0.002273123806402952|0.002447836660973509|1.0|1.0|1.0|1.0|1.0|1.0|1.0|9.481225934947535e-06|1.0|1.0|1.0|…	1.9851843004670448e-08|1.0|1.0|1.0709473508137051e-05|2.4315120337920036e-06|1.0|6.155906917921063e-06|5.862483991957409e-08|4.553187701708228e-08|0.01562746172981489|0.0005098837134253922|0.006197054837907618|1.0|0.00011813613988129971|1.0|1.0|8.385451151997963e-12|1.0|0.009909292004545805|0.00571136634774611|0.00647575836236378|1.0|1.0|1.0|1.0|1.0|1.0|1.0|4.369228541450477e-05|1.0|1.0|1.0|1.0|1…	1	1
GO:0006384	CRCP GTF3C1 SNAPC5 POLR3H GTF3C4 BDP1 BRF1 GTF3C5	8	transcription initiation at RNA polymerase III promoter	RNA Polymerase III Transcription	The primary biological process performed by this system of interacting proteins is RNA Polymerase III (Pol III) transcription. The proteins involved in this process are CRCP, GTF3C1, SNAPC5, POLR3H, GTF3C4, BDP1, BRF1, and GTF3C5. 1. Formation of the Pol III pre-initiation complex: The proteins GTF3C1, GTF3C4, GTF3C5, BDP1, and BRF1 are general transcription factors that form the Pol III pre-init…	1	8	0.819905	5	0.999591	positive regulation of inflammatory response to antigenic stimulus	0.184769	9731	0.203291	transcription by RNA polymerase III|tRNA transcription by RNA polymerase III|transcription by RNA polymerase I|positive regulation of transcription by RNA polymerase III|transcription initiation at RNA polymerase III promoter|regulation of transcription by RNA polymerase III|snRNA transcription by RNA polymerase III|negative regulation of transcription by RNA polymerase III|transcription by RNA p…	0.979002|0.8366729|0.83096063|0.8231844|0.81990516|0.81537044|0.8005904|0.75869465|0.75631297|0.7379894|0.7183757|0.7109448|0.6887356|0.68265986|0.68086016|0.6739274|0.6596685|0.6504918|0.6414418|0.6341476|0.63390255|0.633162|0.62734914|0.62642|0.626274|0.6244914|0.6239221|0.6221142|0.6206717|0.62032634|0.61889184|0.61755633|0.6166726|0.6160363|0.6142194|0.6125581|0.6075821|0.60196155|0.59750444|…	5.6280477784614836e-21|2.3317971254167647e-09|1.0|0.008369855070670739|5.409161774076614e-30|0.013915644630618763|0.0037275359247043813|1.0|0.7360344411985951|1.0|1.0|1.0|1.0|1.0|1.0|1.0|1.0|1.0|1.3604575647214105e-12|1.0|1.0|1.0|0.008833044254946312|0.007442908471373645|1.3327470812581727e-09|1.0|2.836264477732279e-06|1.0|1.2766554970015636e-09|1.0|1.1980857804866346e-17|2.842805300952744e-06|0.…	1.857441511043394e-20|5.687310061992109e-09|1.0|0.01379892115237004|4.36222723715856e-29|0.024912615242686578|0.007127219741308568|1.0|1.0|1.0|1.0|1.0|1.0|1.0|1.0|1.0|1.0|1.0|9.447621977232018e-12|1.0|1.0|1.0|0.021649618271927237|0.01954869551981486|7.659465984242372e-09|1.0|1.4397281612854207e-05|1.0|8.399049322378709e-09|1.0|1.2351399798831284e-16|1.4027457300500232e-05|0.001623691962850983|1.0…	1	1
GO:0003365	AMOT AMOTL1 AMOTL2	3	establishment of cell polarity involved in ameboidal cell migration	Angiomotin-mediated Regulation	The primary biological process performed by the interacting proteins AMOT, AMOTL1, and AMOTL2 is the regulation of cellular processes such as cell polarity, migration, and angiogenesis. These proteins belong to the angiomotin (AMOT) family, which is known for its role in endothelial cell function and vascular development. 1. Cell Polarity: AMOT proteins are crucial for establishing and maintainin…	1	3	0.327169	3732	0.694449	response to redox state	0.392552	1263	0.896594	regulation of angiogenesis|regulation of blood vessel remodeling|regulation of sprouting angiogenesis|regulation of vasculogenesis|regulation of vasculature development|blood vessel remodeling|regulation of vascular endothelial growth factor signaling pathway|regulation of endothelial tube morphogenesis|regulation of blood vessel branching|regulation of vascular permeability|maintenance of blood …	0.79556423|0.7174995|0.70626414|0.70293146|0.6563059|0.64040315|0.6397091|0.6345292|0.6343654|0.629163|0.6227949|0.62197936|0.62128735|0.6182283|0.61739725|0.6108146|0.603662|0.5953193|0.5925425|0.59247065|0.5900887|0.5895977|0.58881664|0.58810794|0.5854382|0.58283603|0.5786582|0.5772031|0.57711476|0.57554513|0.5749042|0.5743928|0.57423365|0.57260895|0.57146347|0.5696389|0.5658082|0.5657872|0.563…	0.04887797932118601|1.0|1.0|1.0|0.049554773905460016|1.0|1.0|1.0|1.0|1.0|1.0|1.0|1.0|1.0|1.0|1.0|1.0|1.0|1.0|1.0|1.0|1.0|1.0|2.822756671656462e-05|0.017396962183189525|1.0|0.017569904928075634|1.0|1.0|1.0|1.0|1.0|1.0|1.0|1.0|1.0|1.0|1.0|1.0|1.0|1.0|1.0|1.0|1.0|1.0|1.0|1.0|1.0|1.0|1.0	0.05723416782340282|1.0|1.0|1.0|0.07508299076584851|1.0|1.0|1.0|1.0|1.0|1.0|1.0|1.0|1.0|1.0|1.0|1.0|1.0|1.0|1.0|1.0|1.0|1.0|0.00010732915101355367|0.041920390802866324|1.0|0.044707137221566495|1.0|1.0|1.0|1.0|1.0|1.0|1.0|1.0|1.0|1.0|1.0|1.0|1.0|1.0|1.0|1.0|1.0|1.0|1.0|1.0|1.0|1.0|1.0	1	1
GO:0006863	SLC25A5 AQP9 SLC28A2 SLC28A1 VDAC3 SLC25A4 SLC43A3 SLC29A2 SLC28A3	9	purine nucleobase transport	Nucleoside and Ion Transport	The primary biological process performed by this system of interacting proteins is the transport of nucleosides and ions across cellular membranes. This process is essential for maintaining cellular homeostasis and facilitating various cellular functions. 1. SLC25A5 and SLC25A4: These proteins belong to the solute carrier family 25 (SLC25) and are responsible for the transport of ADP and ATP acro…	1	9	0.788391	10	0.999181	protein unfolding	0.306829	6240	0.489111	nucleoside transport|nucleoside transmembrane transport|nucleotide transport|nucleotide transmembrane transport|nucleobase-containing compound transport|purine nucleoside transmembrane transport|nucleobase transport|regulation of nucleoside transport|pyrimidine nucleoside transport|purine nucleobase transport|purine nucleobase transmembrane transport|ion transmembrane transport|nucleotide-sugar t…	0.9476949|0.94401884|0.84245044|0.8283974|0.82211447|0.81708187|0.8165442|0.7975724|0.7944331|0.78839123|0.7735728|0.7672906|0.75947237|0.7575354|0.7510518|0.74395645|0.74146605|0.7308433|0.72572863|0.7247754|0.71922106|0.7184565|0.7161404|0.71146226|0.70980024|0.7095606|0.70780957|0.7050653|0.703248|0.7029246|0.7007587|0.6970023|0.6952613|0.69523567|0.69405746|0.69373953|0.69041705|0.68411005|0.…	4.406030896569108e-12|1.2244689630622933e-12|0.00018909652157728677|5.627685472180374e-05|3.681234992998486e-10|3.9998161737852927e-10|2.840780531503015e-32|1.0|1.7500581104535577e-13|2.8407805315304932e-33|1.0212161465823513e-17|0.0018872348670471886|1.0|0.0005625657160431253|3.471632484612538e-10|0.00011300727064807388|9.872246912121562e-05|1.0212161465823513e-17|1.0|1.0|9.872246912121562e-05|1…	1.0515586865320068e-11|3.590818073496461e-12|0.00037819304315457353|0.00012102549402538438|1.3241852492800308e-09|1.587228640390989e-09|2.6062206711036835e-31|1.0|1.0294459473256222e-12|3.087804925576623e-32|7.091778795710774e-17|0.00488920950012225|1.0|0.0016693344689706982|2.091344870248517e-09|0.0003693048060394571|0.000338090647675396|9.283783150748648e-17|1.0|1.0|0.0003226224481085478|1.0|0.…	1	1
GO:0036152	LPCAT3 PLAAT3 MBOAT2 PLA2G2F ABHD4 LPGAT1 PLAAT2 LPCAT4 PLAAT4 MBOAT1 PLA2G4C	11	phosphatidylethanolamine acyl-chain remodeling	Lipid Metabolism and Remodeling	The primary biological process performed by this system of interacting proteins is lipid metabolism and remodeling. This conclusion is based on the following analysis: 1. LPCAT3, LPCAT4, and LPGAT1 are lysophospholipid acyltransferases, which catalyze the transfer of fatty acids to lysophospholipids, playing a crucial role in the remodeling of membrane phospholipids and the regulation of lipid me…	1	11	0.583593	143	0.988292	collagen catabolic process	0.360112	3346	0.726052	lipid metabolic process|cellular lipid metabolic process|lipid homeostasis|regulation of lipid metabolic process|membrane lipid metabolic process|neutral lipid metabolic process|lipoprotein metabolic process|cellular response to lipid|response to lipid|lipid modification|regulation of membrane lipid metabolic process|chylomicron remodeling|protein-lipid complex remodeling|monoacylglycerol metabol…	0.87356514|0.8367332|0.8346503|0.7855182|0.7743844|0.76955295|0.7685236|0.76147026|0.7460195|0.7358825|0.7329099|0.7284895|0.7256673|0.7241266|0.7185317|0.715482|0.7150383|0.71326363|0.70941424|0.7094126|0.7073372|0.7073276|0.70621455|0.70587146|0.70548826|0.70275176|0.7006526|0.7004193|0.69734925|0.69641256|0.6944819|0.69228673|0.68383515|0.68323016|0.68210196|0.68140805|0.681208|0.6811199|0.679…	1.0056970417780842e-12|2.413609268717216e-14|0.09626831149197382|0.018633170309928324|1.0|0.0030459059447621208|1.0|1.0|1.0|0.00025896709298235665|1.0|1.0|1.0|1.0|1.0|1.0|1.0|6.932737492389201e-19|2.34592977659099e-08|1.2852924660498522e-09|1.0|0.0018613668033582264|1.0|0.005127035310853789|1.0|0.13359643373172245|1.0|0.01402875618655957|1.0|1.0|0.029205716608623665|1.0|0.05199604372053698|1.0|1.…	2.5268769893921713e-12|7.495680958749117e-14|0.13333561148472828|0.029297437594226924|1.0|0.006280218442808496|1.0|1.0|1.0|0.0006924253823057665|1.0|1.0|1.0|1.0|1.0|1.0|1.0|6.9327374923892005e-18|1.2412326860269787e-07|7.140513700276957e-09|1.0|0.005502331902505681|1.0|0.013819502185589728|1.0|0.26454739352816325|1.0|0.036533219235832214|1.0|1.0|0.07247076081544333|1.0|0.1200832418488152|1.0|1.0|…	1	1
GO:1900148	NF1 CERS2 RRAS	3	negative regulation of Schwann cell migration	Regulation of Ras Signaling Pathway	Protein Interactions: 1. NF1 (Neurofibromin 1) - NF1 is a tumor suppressor protein that negatively regulates the Ras signaling pathway. It functions as a GTPase-activating protein (GAP) for Ras proteins, accelerating the conversion of active Ras-GTP to inactive Ras-GDP. This interaction inhibits the activation of downstream signaling pathways, such as the MAPK and PI3K pathways, which are involve…	1	3	0.263499	3552	0.709186	pro-T cell differentiation	0.136255	10204	0.164565	regulation of Ras protein signal transduction|Ras protein signal transduction|negative regulation of Ras protein signal transduction|positive regulation of Ras protein signal transduction|regulation of small GTPase mediated signal transduction|regulation of Ral protein signal transduction|regulation of Rap protein signal transduction|regulation of signaling|regulation of signaling receptor activi…	0.93818223|0.8031186|0.79005295|0.78697205|0.77405304|0.7344582|0.7196075|0.71514547|0.67689824|0.676264|0.67617846|0.6756426|0.6736058|0.6703025|0.67006505|0.66038|0.6508467|0.6506634|0.6484809|0.6456282|0.6452685|0.6436121|0.64138114|0.6402657|0.63819385|0.63803804|0.63727844|0.6345576|0.6306956|0.6297432|0.6280613|0.62561756|0.6241379|0.6214207|0.6212746|0.62099373|0.6178756|0.6161976|0.615824…	0.03322289504147941|0.0012368359822265097|0.008723924101513462|1.0|0.05192102649824842|1.0|1.0|0.10025930854720018|1.0|1.0|1.0|1.0|0.003670255587830939|1.0|1.0|1.0|0.08011316722213421|0.027751674110417617|1.0|1.0|1.0|1.0|1.0|0.002507083724136571|1.0|1.0|1.0|1.0|0.009941209366044267|1.0|1.0|0.21648552151310807|1.0|1.0|1.0|1.0|1.0|1.0|1.0|1.0|0.2690990272331999|0.02790937513556813|1.0|1.0|1.0|1.0|1…	0.03950403691020144|0.0019205527674324683|0.01391375454786836|1.0|0.07831225716176231|1.0|1.0|0.15592427456796296|1.0|1.0|1.0|1.0|0.008266341414033646|1.0|1.0|1.0|0.1592707101831694|0.058920751826789|1.0|1.0|1.0|1.0|1.0|0.007352151683684958|1.0|1.0|1.0|1.0|0.025821323028686408|1.0|1.0|0.44001122258761804|1.0|1.0|1.0|1.0|1.0|1.0|1.0|1.0|0.6243596919563803|0.07083597750144195|1.0|1.0|1.0|1.0|1.0|1.…	1	1
GO:1900212	PAX2 HNF1B PAX8	3	negative regulation of mesenchymal cell apoptotic process involved in metanephros development	Nephrogenesis Regulation	PAX2: - Paired box gene 2 (PAX2) is a transcription factor involved in kidney and urinary tract development. - PAX2 is essential for the formation of nephrons, the functional units of the kidney. - Mutations in PAX2 can lead to renal coloboma syndrome, characterized by kidney abnormalities and optic nerve defects. HNF1B: - Hepatocyte nuclear factor 1 homeobox B (HNF1B) is a transcription factor i…	1	3	0.515602	326	0.973309	regulation of Schwann cell migration	0.448218	1190	0.902571	regulation of kidney development|regulation of cell proliferation involved in kidney development|nephron development|nephron morphogenesis|kidney development|kidney morphogenesis|pattern specification involved in kidney development|regulation of metanephros development|renal system development|proximal/distal pattern formation involved in metanephric nephron development|regulation of mesonephros …	0.86639804|0.78918|0.78853834|0.7798711|0.7781799|0.76719743|0.7602968|0.75891536|0.757625|0.7542403|0.7508341|0.748322|0.74672365|0.7454057|0.7444078|0.73984104|0.73839253|0.73412365|0.73382807|0.7330508|0.728528|0.7268243|0.7260966|0.72545946|0.7247983|0.7231175|0.7212175|0.7199652|0.7181581|0.7165135|0.7155391|0.7152995|0.7148398|0.7147125|0.71308625|0.71283054|0.71222806|0.7099533|0.7095736|0…	6.496645050986201e-09|1.0|6.832432056858548e-07|9.78307106642191e-08|5.798439081057862e-06|1.7556183033327373e-07|7.346591025812724e-07|0.0010495625989095025|6.3217452686858945e-06|1.0|0.0008746865230634458|6.049881630278188e-07|0.0005248731461074725|3.018034557534316e-07|2.448196864094722e-06|1.7013208300385722e-07|8.710219675317584e-08|1.346717844417213e-06|1.6713071872302252e-05|8.040431764183…	1.3019328759491383e-08|1.0|1.725361630519835e-06|2.6228072564133806e-07|1.4642522931964296e-05|5.891336588364891e-07|2.184154089959521e-06|0.002257255512647207|1.957196677611732e-05|1.0|0.0021287063926458847|2.4007466786818203e-06|0.00139966172295326|1.2734323027570954e-06|1.0552572690063457e-05|7.876485324252649e-07|4.228261978309507e-07|5.80481829490178e-06|6.083569884914303e-05|3.5577131699928…	1	1
GO:0036261	SNRPD3 SNRPG TGS1 SNRPD2 SNRPD1 SNRPE SNRPF SNRPB	8	7-methylguanosine cap hypermethylation	Spliceosome Assembly	The system of interacting proteins SNRPD3, SNRPG, TGS1, SNRPD2, SNRPD1, SNRPE, SNRPF, and SNRPB primarily contributes to the assembly of the spliceosome, a complex responsible for pre-mRNA splicing. 1. SNRPD1, SNRPD2, and SNRPD3 are core components of the Sm protein family, which are essential for the formation of small nuclear ribonucleoproteins (snRNPs). These snRNPs are crucial for the assembl…	1	8	0.260259	6703	0.451204	DNA catabolic process, exonucleolytic	0.32423	3471	0.715818	spliceosomal complex assembly|spliceosomal snRNP assembly|spliceosomal tri-snRNP complex assembly|cis assembly of pre-catalytic spliceosome|mRNA splicing, via spliceosome|mRNA cis splicing, via spliceosome|alternative mRNA splicing, via spliceosome|generation of catalytic spliceosome for first transesterification step|generation of catalytic spliceosome for second transesterification step|spliceo…	0.9761741|0.92084295|0.90338105|0.88307375|0.87252986|0.8352393|0.8336977|0.81210256|0.77377325|0.76520944|0.76222086|0.7580466|0.7490059|0.7479383|0.726677|0.7230397|0.71649826|0.71392363|0.7122282|0.710552|0.70341986|0.70053697|0.69278455|0.6736587|0.6699293|0.66961265|0.66714334|0.66577333|0.6648049|0.6644348|0.660774|0.6582029|0.65228254|0.65061975|0.6439481|0.6406038|0.64057124|0.61153096|0.…	1.6625429606142409e-16|2.645268995453961e-22|1.0|1.0|8.230043985333613e-15|1.0|1.0|1.0|1.0|1.0|3.205675927029586e-20|1.0|1.0|1.0|1.0|1.0|1.0|1.0|1.6729144345925304e-13|1.0|2.746155850959488e-16|1.0|1.0|1.0|1.0|2.081350205979367e-13|1.0|1.0|1.0|1.0|1.0|1.0|1.0|1.0|1.0|1.0|9.158147711148464e-15|1.0|1.0|3.791291983092558e-16|1.0|1.0|1.0|1.0|1.0|1.0|1.0|1.0|1.0|1.0	4.889832237100708e-16|1.0753125997780329e-21|1.0|1.0|3.8638704156495835e-14|1.0|1.0|1.0|1.0|1.0|2.504434317991864e-19|1.0|1.0|1.0|1.0|1.0|1.0|1.0|1.1949388818518073e-12|1.0|2.179488770602768e-15|1.0|1.0|1.0|1.0|1.5649249669017796e-12|1.0|1.0|1.0|1.0|1.0|1.0|1.0|1.0|1.0|1.0|1.2545407823491048e-13|1.0|1.0|4.076658046336083e-15|1.0|1.0|1.0|1.0|1.0|1.0|1.0|1.0|1.0|1.0	1	1
GO:0060581	SOX1 GLI3 ASCL1 NKX2-2 FOXN4 DBX1 DMRT3 LHX3 DLL4 GLI2 SUFU	11	cell fate commitment involved in pattern specification	Neural Differentiation	The primary biological process performed by this system of interacting proteins is neural differentiation, which is the process by which neural progenitor cells give rise to various types of neurons and glial cells. 1. SOX1: SOX1 is a transcription factor that plays a crucial role in the early stages of neural differentiation. It is involved in the maintenance of neural progenitor cells and the s…	1	11	0.628358	253	0.979286	negative regulation of tissue remodeling	0.283362	7129	0.416326	neuron differentiation|nerve development|central nervous system neuron differentiation|neuron development|neuroblast differentiation|nervous system development|Schwann cell differentiation|neuron maturation|neuroepithelial cell differentiation|neurogenesis|cell morphogenesis involved in neuron differentiation|neuron fate specification|neuron fate determination|nerve maturation|neuron fate commitm…	0.9258456|0.87288207|0.87080455|0.8681655|0.8625611|0.840649|0.84035534|0.839355|0.83721834|0.8367764|0.8339545|0.8332271|0.83125937|0.83030665|0.82418907|0.8237237|0.8092174|0.8035203|0.80218744|0.79465675|0.79257226|0.78907657|0.78728026|0.7826388|0.7821512|0.781852|0.7791222|0.7755934|0.76816106|0.7560696|0.7555822|0.75488716|0.75219476|0.752085|0.75190336|0.74860656|0.7481668|0.7478299|0.7467…	8.57591331660696e-13|0.001390082778094738|9.119949979867961e-23|0.0003777918729342498|0.005122224195787882|6.109254836090455e-10|1.0|1.0|1.1629887237564949e-06|6.802214869275054e-12|0.0048673939707343005|6.010654759393899e-24|0.006399047718592414|1.0|1.631531258990809e-27|1.0|0.04093323417736591|1.9530484163011506e-05|8.8658787833551e-06|2.335670281386721e-07|1.0|1.4944709061284359e-12|0.00031773…	2.171117295343534e-12|0.0021451894723684226|4.749973947847896e-22|0.0007451516231444769|0.00913052441316913|2.395786210231551e-09|1.0|1.0|3.8637499128122755e-06|3.384186502126892e-11|0.010356157384541065|5.892798783719509e-23|0.014063841139763545|1.0|1.8331811898773134e-26|1.0|0.08690242312509402|7.342287279327633e-05|3.333037136599662e-05|9.731959505778003e-07|1.0|1.1495930047141813e-11|0.001005…	1	1
GO:0031581	COL17A1 ITGB4 LAMC1 LAMA3 DST PLEC	6	hemidesmosome assembly	Hemidesmosome Formation	Proteins COL17A1, ITGB4, LAMC1, LAMA3, DST, and PLEC are involved in the formation and maintenance of hemidesmosomes, which are essential for cell adhesion and maintaining tissue integrity. 1. COL17A1 (Collagen XVII) is a transmembrane protein that interacts with the extracellular matrix (ECM) and other hemidesmosomal proteins. It plays a crucial role in anchoring keratinocytes to the basement me…	1	6	0.980144	1	0.999918	regulation of smooth muscle cell differentiation	0.353988	4343	0.644424	hemidesmosome assembly|microspike assembly|desmosome assembly|membrane to membrane docking|membrane docking|membrane fission|sister chromatid biorientation|plasma membrane fusion|podosome assembly|DNA methylation-dependent heterochromatin formation|heterochromatin formation|membrane fusion|myotome development|constitutive heterochromatin formation|cytoskeleton-dependent cytokinesis|synaptonemal c…	0.9801437|0.6511856|0.64521354|0.6404163|0.6398246|0.63834333|0.63664836|0.6285745|0.6231299|0.6184408|0.6152784|0.6152301|0.61443686|0.6116451|0.6109979|0.6102123|0.6091513|0.6090251|0.60071874|0.6004018|0.59972394|0.5992342|0.5986868|0.5974841|0.5949402|0.59459794|0.59446025|0.59423083|0.5921224|0.59150314|0.590564|0.5904624|0.59043175|0.590415|0.5901073|0.58950835|0.5888792|0.58876127|0.588608…	2.8371843822140086e-23|1.0|1.0|1.0|1.0|1.0|1.0|1.0|1.0|1.0|1.0|1.0|1.0|1.0|0.039243319210832794|1.0|1.0|1.0|1.0|1.0|1.0|1.0|1.0|1.0|1.0|1.0|1.0|1.0|1.0|1.0|1.0|1.0|0.0630293107166537|1.0|1.0|1.0|1.0|1.0|1.0|1.0|1.0|1.0|1.0|0.19158488328093964|1.0|1.0|1.0|1.0|1.0|1.0	1.0096741573715332e-22|1.0|1.0|1.0|1.0|1.0|1.0|1.0|1.0|1.0|1.0|1.0|1.0|1.0|0.08141767471127136|1.0|1.0|1.0|1.0|1.0|1.0|1.0|1.0|1.0|1.0|1.0|1.0|1.0|1.0|1.0|1.0|1.0|0.14260025049016675|1.0|1.0|1.0|1.0|1.0|1.0|1.0|1.0|1.0|1.0|0.45615448400223724|1.0|1.0|1.0|1.0|1.0|1.0	1	1
GO:0099553	F2R GRM5 CNR1	3	trans-synaptic signaling by endocannabinoid, modulating synaptic transmission	GPCR-Mediated Signaling	Proteins: F2R, GRM5, CNR1 F2R (Coagulation Factor II Receptor): F2R, also known as PAR1, is a G protein-coupled receptor (GPCR) involved in the regulation of thrombotic response. It is activated by thrombin, leading to platelet activation and aggregation, as well as endothelial cell activation. This contributes to hemostasis and vascular integrity. GRM5 (Metabotropic Glutamate Receptor 5): GRM5 i…	1	3	0.429446	823	0.932618	negative regulation of muscle tissue development	0.213537	10197	0.165138	G protein-coupled receptor signaling pathway|regulation of G protein-coupled receptor signaling pathway|positive regulation of G protein-coupled receptor signaling pathway|G protein-coupled receptor signaling pathway coupled to cGMP nucleotide second messenger|protein kinase C-activating G protein-coupled receptor signaling pathway|G protein-coupled glutamate receptor signaling pathway|cGMP-media…	0.87188846|0.77200913|0.7614132|0.73679113|0.73460233|0.7304014|0.7260983|0.71672684|0.71510303|0.697662|0.69715095|0.6957867|0.68798745|0.6842296|0.6819065|0.6752168|0.66820437|0.6660578|0.66385657|0.6577394|0.65536916|0.65437657|0.6501261|0.64979255|0.6453181|0.64364827|0.6412401|0.6401439|0.6392435|0.63882816|0.63863766|0.6385051|0.638152|0.63349926|0.63316417|0.6322741|0.631621|0.6309389|0.63…	0.0003639213131638131|0.023954530135538162|1.0|1.0|7.157910877971182e-06|0.002447836660973509|1.0|0.026878708361725928|0.0005994613589856775|1.0|0.0001068070320175483|1.0|0.01150482556071041|0.013413675219558933|1.0|0.0015740683905197974|0.009419637781687853|0.0038448052977637726|1.0|1.0|1.0|1.0|1.0|1.0|1.0|1.0|1.0|0.000349935842712393|1.0|1.0|1.0|1.0|0.08513215141101024|1.0|1.0|1.0|1.0|1.0|1.0|1…	0.0005184064290082808|0.03202477290847348|1.0|1.0|1.785015181538948e-05|0.005110306181573088|1.0|0.046745579759523356|0.001451480288100914|1.0|0.00030171477971058843|1.0|0.024018424970167873|0.031194593533857985|1.0|0.004197515708052793|0.02280783966510376|0.01019842254048746|1.0|1.0|1.0|1.0|1.0|1.0|1.0|1.0|1.0|0.0012150550094180313|1.0|1.0|1.0|1.0|0.1871036294747478|1.0|1.0|1.0|1.0|1.0|1.0|1.0|1…	1	1
GO:0060398	GDF15 LEPROT GHRL MBD5 LEPROTL1 JAK2	6	regulation of growth hormone receptor signaling pathway	Growth Regulation and Energy Homeostasis	GDF15: - Growth differentiation factor 15 - Role in regulating growth, inflammation, and energy homeostasis - Inhibits appetite and increases energy expenditure - Supports: GDF15 as a key player in energy homeostasis LEPROT and LEPROTL1: - Leptin receptor overlapping transcript (LEPROT) and its homolog LEPROTL1 - Negative regulators of leptin receptor cell surface expression - Leptin: hormone inv…	1	6	0.581992	58	0.995251	nucleoside triphosphate catabolic process	0.270703	8472	0.30637	energy homeostasis|regulation of growth|glucose homeostasis|regulation of appetite|regulation of multicellular organism growth|regulation of response to food|regulation of growth rate|regulation of response to nutrient levels|response to dietary excess|response to nutrient levels|regulation of eating behavior|response to nutrient|gas homeostasis|energy reserve metabolic process|response to starva…	0.82411015|0.7162961|0.71289474|0.7124796|0.6956319|0.69187796|0.69091403|0.6896989|0.6886092|0.6819075|0.67281854|0.6679877|0.6650759|0.6605277|0.654068|0.6488054|0.64814126|0.6411513|0.640566|0.6395714|0.63831484|0.63456404|0.6302751|0.6296556|0.62844753|0.6269809|0.62694967|0.61991847|0.6184257|0.61593956|0.61384094|0.61216664|0.6110916|0.6081463|0.60788774|0.6076612|0.606637|0.606582|0.605731…	1.0|0.0008390069065018596|0.00275156595419291|0.0073276796216350274|1.0807744629708518e-06|0.005587065763540129|0.0017487608778113898|0.01010738043766577|0.011841397224648645|0.010756998960215609|0.0027967935913899063|1.0|1.0|1.0|1.0|0.0027744502071896156|0.0017487608778113898|5.024653540789863e-18|0.05069580379836211|1.0|1.0|1.0|1.0|1.0|0.013226787470769002|0.009760272979582964|0.004192744093874…	1.0|0.0013254453499239487|0.004768745154580434|0.012253644852232487|2.9680304892856442e-06|0.010806703604526362|0.003576823785093596|0.01864830339052725|0.023399337252388595|0.02222520446325539|0.006228938956324958|1.0|1.0|1.0|1.0|0.0071139748902297835|0.00496807067560054|4.7853843245617746e-17|0.10496025631130872|1.0|1.0|1.0|1.0|1.0|0.03285420612128765|0.024279286018863092|0.012442826850398773|0…	1	1
GO:0006432	LRRC47 FARSB FARSA FARS2	4	phenylalanyl-tRNA aminoacylation	Aminoacyl-tRNA Synthesis	Proteins LRRC47, FARSB, FARSA, and FARS2 are involved in the biological process of aminoacyl-tRNA synthesis. This process is essential for protein translation, as it charges tRNA molecules with their corresponding amino acids. 1. Role of FARSB, FARSA, and FARS2 in aminoacyl-tRNA synthesis: - FARSB, FARSA, and FARS2 are phenylalanyl-tRNA synthetases, which catalyze the attachment of phenylalanine …	1	4	0.613226	36	0.997053	negative regulation of autophagy of mitochondrion	0.23071	6140	0.497298	tRNA aminoacylation|tRNA aminoacylation for protein translation|alanyl-tRNA aminoacylation|arginyl-tRNA aminoacylation|threonyl-tRNA aminoacylation|tRNA modification|tRNA transport|tRNA aminoacylation for mitochondrial protein translation|tRNA processing|methionyl-tRNA aminoacylation|tyrosyl-tRNA aminoacylation|tRNA transcription|tRNA surveillance|seryl-tRNA aminoacylation|tRNA import into mitoch…	0.91428715|0.8806361|0.7776801|0.73589516|0.7306222|0.72367585|0.71847403|0.7109795|0.7101313|0.7071728|0.7066468|0.7040005|0.69943464|0.6786499|0.6685188|0.66560173|0.66447014|0.66408485|0.6640602|0.66114956|0.65795934|0.6567219|0.6549487|0.6545766|0.6467865|0.6416047|0.6400072|0.63933665|0.6309253|0.6302984|0.63029313|0.63003325|0.62750024|0.62363577|0.6166532|0.6132257|0.6124708|0.61236525|0.6…	4.13985350138936e-11|3.109995653603868e-11|1.0|1.0|1.0|1.0|1.0|1.0|0.030672910541378735|1.0|1.0|1.0|1.0|1.0|1.0|1.0|1.0|1.0|1.0|1.0|1.0|1.0|1.0|1.589628613432294e-08|1.0|1.0|1.0|1.0|1.0|1.0|1.0|1.0|1.0|1.0|1.0|2.7785184075986976e-16|1.0|1.0|2.312092758400542e-06|1.0|1.0|1.0|1.0|1.0|1.0|1.0|1.0|1.0|1.0|1.0	9.495076838048991e-11|8.54394410330733e-11|1.0|1.0|1.0|1.0|1.0|1.0|0.056592085869702456|1.0|1.0|1.0|1.0|1.0|1.0|1.0|1.0|1.0|1.0|1.0|1.0|1.0|1.0|8.546390394797279e-08|1.0|1.0|1.0|1.0|1.0|1.0|1.0|1.0|1.0|1.0|1.0|3.020128703911628e-15|1.0|1.0|1.2430606227959904e-05|1.0|1.0|1.0|1.0|1.0|1.0|1.0|1.0|1.0|1.0|1.0	1	1
GO:1901906	NUDT11 NUDT4 NUDT3 NUDT10	4	diadenosine pentaphosphate metabolic process	Nucleotide Degradation	The primary biological process performed by the interacting proteins NUDT11, NUDT4, NUDT3, and NUDT10 is nucleotide degradation. These proteins belong to the Nudix hydrolase family, which is responsible for the hydrolysis of nucleoside diphosphates linked to other moieties, X (Nudix substrates). 1. NUDT11: NUDT11 is a CoA diphosphohydrolase that hydrolyzes CoA esters, including dephospho-CoA and …	1	4	0.456727	503	0.958818	chromosome separation	0.349638	1973	0.838464	nucleotide catabolic process|nucleoside catabolic process|nucleotide-sugar catabolic process|purine nucleotide catabolic process|nucleoside diphosphate catabolic process|deoxyribonucleotide catabolic process|nucleoside monophosphate catabolic process|nucleoside triphosphate catabolic process|purine nucleoside catabolic process|purine deoxyribonucleotide catabolic process|purine nucleoside triphos…	0.9436825|0.81919193|0.79027677|0.7746637|0.7739259|0.7716851|0.76008236|0.7569548|0.7463666|0.74531156|0.7400837|0.7375165|0.7329666|0.7300495|0.72659767|0.726068|0.72404015|0.71578234|0.7132114|0.70859194|0.7068222|0.70652795|0.706252|0.70407456|0.7031466|0.70058686|0.70046616|0.6970668|0.6943387|0.6926205|0.6924236|0.6895238|0.68820393|0.6860631|0.6839009|0.6830289|0.6828674|0.68200326|0.67516…	3.7600994981061453e-10|1.0|1.0|5.887013661436439e-11|1.0|1.0|1.0|1.0|1.0|1.0|1.0|1.0|1.0|5.887013661436439e-11|5.900336657021202e-10|1.0|1.0|1.0|3.4173845899383515e-07|1.0|1.0|1.0|3.4289695668071734e-11|1.0|1.0|1.0|1.0|1.0|1.0|1.0|1.0|1.4267647222484417e-06|1.0|1.0|1.0|1.0|1.0|1.0|1.0|1.0|1.0|1.0|1.0|1.0|1.0|1.0|1.0|1.0|1.0|1.0	8.086235479798161e-10|1.0|1.0|2.0370289485939235e-10|1.0|1.0|1.0|1.0|1.0|1.0|1.0|1.0|1.0|3.4028980701944735e-10|3.4913234656930185e-09|1.0|1.0|1.0|1.5748316082665215e-06|1.0|1.0|1.0|2.1166478807451687e-10|1.0|1.0|1.0|1.0|1.0|1.0|1.0|1.0|7.431066261710634e-06|1.0|1.0|1.0|1.0|1.0|1.0|1.0|1.0|1.0|1.0|1.0|1.0|1.0|1.0|1.0|1.0|1.0|1.0	1	1
GO:0044771	USP17L2 CHFR CDC25B MOS CDC25C MAPK15 NDC80 CCNB2 TTK CDC25A OVOL1	11	meiotic cell cycle phase transition	Cell Cycle Regulation	The system of interacting proteins primarily involves cell cycle regulation, specifically the G2/M transition and mitotic progression. Key proteins in this process include CDC25A, CDC25B, CDC25C, CCNB2, and TTK. 1. CDC25 phosphatases (CDC25A, CDC25B, and CDC25C) play a crucial role in cell cycle progression by activating cyclin-dependent kinases (CDKs). They remove inhibitory phosphate groups fro…	1	11	0.504519	310	0.974619	MHC class II biosynthetic process	0.226335	9520	0.220567	regulation of cell cycle|regulation of cell cycle process|cell cycle process|cell cycle|regulation of cell division|regulation of mitotic cell cycle|cell cycle phase transition|regulation of cell cycle phase transition|positive regulation of cell cycle|positive regulation of cell cycle process|regulation of cellular process|regulation of hair cycle|negative regulation of cell cycle|negative regul…	0.9696312|0.9569659|0.89759624|0.8778105|0.862698|0.7967051|0.79070914|0.78216857|0.7732655|0.76145947|0.7455276|0.7371857|0.7350528|0.7266474|0.7243891|0.71880925|0.7152857|0.71092665|0.70945466|0.7093967|0.7065451|0.6988743|0.697129|0.69577|0.69290984|0.6912976|0.6860704|0.6830766|0.6810686|0.67893285|0.6685233|0.6637287|0.6635003|0.6624272|0.661338|0.6611296|0.66030467|0.65963286|0.65951717|0.…	7.090598179478434e-14|1.3768490990728111e-13|2.4629791768707607e-13|1.4600350049675823e-11|0.11424954222646543|4.588655998560035e-09|3.09720099301206e-17|8.293355818780014e-16|2.34592977659099e-08|2.5655699125584615e-07|0.00626091127697943|1.0|2.2129141492503757e-06|6.614307029166171e-07|1.0|1.0121314983884473e-06|1.0|1.0|1.0|1.0|1.9603196455919712e-08|1.0|9.408889376693511e-08|1.0|1.0|9.44753730…	1.86594688933643e-13|4.1722699971903366e-13|8.923837597357829e-13|5.407537055435489e-11|0.16533942435089063|1.712185074089565e-08|1.9237273248522112e-16|4.966081328610787e-15|9.575223577922408e-08|8.970524169784831e-07|0.01293576710119717|1.0|7.8472132952141e-06|2.6997171547617028e-06|1.0|4.3439120102508465e-06|1.0|1.0|1.0|1.0|9.752834057671498e-08|1.0|4.54535718680846e-07|1.0|1.0|4.9463546107892…	1	1
GO:0045006	EXOSC3 AICDA CDADC1 EXOSC4 APOBEC3A_B APOBEC3C EXOSC6 APOBEC3B APOBEC3H EXOSC5 APOBEC3F APOBEC3G APOBEC3A	13	DNA deamination	RNA Exosome Complex and APOBEC Family Deamination	The primary biological process performed by this system of interacting proteins is the regulation of RNA metabolism and deamination of cytidine to uridine in RNA and DNA. This process involves the RNA exosome complex and the APOBEC family of proteins. 1. RNA Exosome Complex: EXOSC3, EXOSC4, EXOSC5, and EXOSC6 are components of the RNA exosome complex, a multi-protein complex responsible for the d…	1	13	0.436433	216	0.982315	renal sodium excretion	0.287607	5204	0.573932	polyadenylation-dependent ncRNA catabolic process|polyadenylation-dependent RNA catabolic process|box C/D RNA 3'-end processing|extracellular exosome assembly|exonucleolytic catabolism of deadenylated mRNA|extracellular exosome biogenesis|nuclear-transcribed mRNA catabolic process, endonucleolytic cleavage-dependent decay|nuclear-transcribed mRNA catabolic process, deadenylation-dependent decay|n…	0.62403953|0.6125357|0.60810184|0.5991763|0.59665823|0.59476644|0.58657014|0.5846734|0.5737771|0.56892836|0.5686884|0.56620204|0.5626941|0.56202036|0.5592534|0.55855274|0.55686194|0.5566663|0.5556126|0.5524322|0.5513089|0.5491977|0.5490171|0.5463003|0.5438703|0.5427331|0.5415481|0.5404134|0.539835|0.5386961|0.53797233|0.53797066|0.53790927|0.53746676|0.53475285|0.53288585|0.5307492|0.5236109|0.52…	0.006051067000024021|0.0068050692253381175|1.0|1.0|3.4878738665812904e-05|1.0|1.0|0.001141272300206616|1.0|6.536660186636842e-11|1.0|1.0|1.0|1.0|1.0|1.0|1.0|1.0|0.005296536423334373|1.0|1.0|1.0|1.0|0.005296536423334373|1.0|0.00025450260488381403|1.0|1.0|1.0|2.9094133643824117e-08|1.0|1.0|1.0|0.0068050692253381175|1.0|6.043461577751414e-10|3.4424139338667225e-24|1.1374136477228558e-06|1.0|1.0|1.0|…	0.007708365605126141|0.009735435229382142|1.0|1.0|8.01810084271561e-05|1.0|1.0|0.0024386160260825122|1.0|3.068854547716827e-10|1.0|1.0|1.0|1.0|1.0|1.0|1.0|1.0|0.013375091978117103|1.0|1.0|1.0|1.0|0.014199829553175263|1.0|0.000828998712976593|1.0|1.0|1.0|1.9140877397252709e-07|1.0|1.0|1.0|0.0192233593936105|1.0|4.476638205741788e-09|7.324284965673878e-23|6.462577543879862e-06|1.0|1.0|1.0|1.0|0.024…	1	1
GO:0033088	BMP4 ERBB2 TMEM131L IHH CLEC4G	5	negative regulation of immature T cell proliferation in thymus	BMP4-IHH Signaling Pathway	Protein interactions: 1. BMP4: Bone morphogenetic protein 4 (BMP4) is a member of the transforming growth factor-beta (TGF-beta) superfamily. It plays a crucial role in embryonic development, cell differentiation, and bone formation. BMP4 interacts with IHH to regulate chondrocyte differentiation and bone development. 2. ERBB2: Human epidermal growth factor receptor 2 (ERBB2) is a receptor tyrosi…	1	5	0.183359	10796	0.116096	ATP export	0.326294	4534	0.628787	BMP signaling pathway|BMP signaling pathway involved in heart induction|BMP signaling pathway involved in heart development|activin receptor signaling pathway|smoothened signaling pathway|thyroid-stimulating hormone signaling pathway|Notch signaling pathway involved in heart induction|SMAD protein signal transduction|smoothened signaling pathway involved in dorsal/ventral neural tube patterning|n…	0.74938893|0.73759824|0.73129743|0.69228756|0.67784214|0.6730305|0.6600792|0.6576744|0.6467788|0.6443709|0.6429558|0.63134885|0.62725073|0.6267595|0.6261787|0.623963|0.6231128|0.6222216|0.61948526|0.616704|0.61628765|0.6139765|0.60716337|0.60706186|0.60689014|0.60213166|0.5976764|0.59558177|0.59469104|0.59453166|0.59421563|0.5915646|0.5895046|0.58924913|0.5889958|0.58520997|0.5844432|0.5811655|0.…	0.04524128739570471|0.0005831923832887411|0.0020399830142162085|1.0|0.0418638057675405|1.0|1.0|0.02454682960178821|1.0|1.0|1.0|1.0|0.011323267507696137|1.0|0.02996726843315551|1.0|1.0|0.019102186739035482|1.0|1.0|0.048328938687909835|1.0|1.0|1.0|0.009298476736747566|0.005529350308206599|0.02454682960178821|1.0|1.0|1.0|0.010745093991557072|1.0|1.0|1.0|1.0|1.0|1.0|1.0|1.0|1.0|1.0|1.0|0.002039983014…	0.05322504399494672|0.0009301313928050097|0.0035978536405929604|1.0|0.06410996289056738|1.0|1.0|0.04276451150137319|1.0|1.0|1.0|1.0|0.023738506305442636|1.0|0.06416973968555784|1.0|1.0|0.04346699221387105|1.0|1.0|0.09476262487825458|1.0|1.0|1.0|0.024534239410943445|0.014550921863701575|0.06136707400447052|1.0|1.0|1.0|0.029040794571775868|1.0|1.0|1.0|1.0|1.0|1.0|1.0|1.0|1.0|1.0|1.0|0.0073380683964…	1	1
GO:0097374	GBX1 NRP1 NRP2	3	sensory neuron axon guidance	Axon Guidance	Protein Interaction Analysis: 1. GBX1 (Gastrulation Brain Homeobox 1) - Function: Transcription factor involved in early embryonic development, specifically in the formation of the midbrain-hindbrain boundary. - Reasoning: GBX1 is essential for proper brain development and neural tube closure. 2. NRP1 (Neuropilin 1) - Function: Co-receptor for VEGF (vascular endothelial growth factor) and semapho…	1	3	0.7681	16	0.99869	negative regulation of cell development	0.283739	6448	0.472081	axon guidance|axon extension involved in axon guidance|regulation of axon guidance|anterior/posterior axon guidance|positive regulation of axon guidance|dorsal/ventral axon guidance|neuron projection guidance|axonogenesis|regulation of axon extension involved in axon guidance|motor neuron axon guidance|axon development|interneuron axon guidance|regulation of axonogenesis|commissural neuron axon g…	1.0|0.88595045|0.88461673|0.8700191|0.8313654|0.8305993|0.8207872|0.8115364|0.80932605|0.807619|0.7997253|0.79925936|0.7904489|0.7705754|0.7695459|0.76809967|0.76696384|0.76375294|0.75895244|0.7511018|0.7491408|0.7469603|0.7450013|0.72901636|0.7289051|0.7196455|0.7164419|0.7121149|0.7113879|0.70578766|0.7050283|0.70317394|0.70260435|0.70259535|0.70141655|0.6997869|0.69691384|0.69615567|0.6938473|…	2.6753877326638208e-06|1.4330076033766966e-05|0.0020983905530807564|1.0|0.0006997900391816126|1.0|2.7092534001961915e-06|1.7136736243069338e-05|0.005937811913511379|0.005589181267434535|2.349125408541636e-05|1.0|0.02739413276499388|0.0019236369000304916|0.00015243621139164718|1.1907340635837106e-12|1.0|1.0|0.0012244182679496927|1.0|0.01635887947013418|1.0|1.0|1.0|0.004891675456159897|1.0|1.0|0.00…	4.5268827963854835e-06|2.6390563598097543e-05|0.0036878568595443877|1.0|0.0013912326822696076|1.0|7.653258192644608e-06|4.594299260876498e-05|0.01247439477628441|0.012392863120697416|7.118561844065564e-05|1.0|0.053004707370081165|0.005199018648731058|0.000499790857021794|8.909719267940757e-12|1.0|1.0|0.003458808666524556|1.0|0.0357962351644074|1.0|1.0|1.0|0.013818292249039257|1.0|1.0|0.0112421207…	0.0492164	0.665087
GO:0003430	RARG TGFBR2 SOX9	3	growth plate cartilage chondrocyte growth	Chondrogenesis Regulation	Proteins: RARG, TGFBR2, SOX9 1. RARG (Retinoic Acid Receptor Gamma) - Nuclear receptor for retinoic acid. - Role: Regulates gene expression and cell differentiation. - Interaction: RARG binds to retinoic acid, modulating gene expression and influencing SOX9 activity. 2. TGFBR2 (Transforming Growth Factor Beta Receptor 2) - Transmembrane receptor for TGF-beta. - Role: Mediates TGF-beta signaling, …	1	3	0.625143	24	0.998035	diadenosine pentaphosphate metabolic process	0.288509	7525	0.383904	regulation of cartilage development|regulation of chondrocyte differentiation|regulation of chondrocyte development|cartilage homeostasis|cartilage morphogenesis|cartilage development|chondrocyte differentiation|chondrocyte development|chondroblast differentiation|growth plate cartilage morphogenesis|regulation of ossification|growth plate cartilage chondrocyte differentiation|cartilage developme…	0.8174652|0.7938752|0.7908688|0.7706265|0.7469075|0.7396153|0.7267449|0.71833044|0.70341057|0.68067276|0.6796968|0.6729715|0.670899|0.6702663|0.66887|0.6678487|0.6663823|0.6503161|0.64672065|0.64433146|0.64231|0.6342187|0.6275657|0.625143|0.6201969|0.61867785|0.6185044|0.61168927|0.6092609|0.608546|0.598804|0.594377|0.59388065|0.5927387|0.5918383|0.58845174|0.5882791|0.5882749|0.585413|0.5826454|…	5.203296860032738e-05|2.9151581113717546e-05|1.0|1.0|1.0|1.5639101191313894e-06|2.939981939673858e-07|6.496645050986201e-09|1.0|1.0|0.021197016598581035|1.428880876302482e-10|6.496645050986201e-09|6.668110756098679e-11|1.0|5.417839989384708e-10|1.1907340635721928e-11|1.1538213076225707e-09|1.0|1.0|0.003321094999841158|0.017742827381958752|0.01808861141108759|1.1907340635837106e-12|0.0055891812674…	7.930089906425721e-05|5.243090128366465e-05|1.0|1.0|1.0|4.682365626141884e-06|9.158822241974636e-07|2.4987096349946926e-08|1.0|1.0|0.039473029047636936|7.600430193098308e-10|2.718261527609289e-08|3.832247560976253e-10|1.0|3.205822478925863e-09|7.632910663924312e-11|7.122353750756609e-09|1.0|1.0|0.00849384910445309|0.04316989630646899|0.041775084090271565|8.8202523228423e-12|0.015482496585691233|1…	1	1
GO:0060842	HEY1 RBPJ TMEM100 HEY2 NOTCH1 DLL1	6	arterial endothelial cell differentiation	Notch Signaling Pathway	The Notch signaling pathway is the most prominent biological process performed by the interacting proteins HEY1, RBPJ, TMEM100, HEY2, NOTCH1, and DLL1. This pathway is crucial for cell-cell communication, differentiation, and development. 1. NOTCH1 and DLL1 interaction: NOTCH1 is a transmembrane receptor protein, while DLL1 is a ligand. The binding of DLL1 to NOTCH1 initiates the Notch signaling …	1	6	0.340646	2719	0.777387	response to iron(III) ion	0.296976	4646	0.619617	Notch signaling pathway|regulation of Notch signaling pathway|positive regulation of Notch signaling pathway|Notch signaling involved in heart development|Notch signaling pathway involved in heart induction|Notch receptor processing|nodal signaling pathway|negative regulation of Notch signaling pathway|Norrin signaling pathway|Wnt signaling pathway|positive regulation of Notch signaling pathway i…	0.9999998|0.835603|0.81343293|0.80767655|0.78664446|0.7792783|0.75877166|0.7533897|0.69127697|0.68580085|0.66489434|0.6614325|0.6495863|0.64909685|0.6476748|0.6420685|0.6413685|0.6376921|0.6368052|0.6324966|0.62597615|0.62580836|0.6239921|0.6204763|0.61966985|0.61776465|0.6170903|0.6145984|0.61274254|0.6112517|0.6088697|0.6087601|0.60653925|0.6063664|0.6063521|0.60367584|0.60129845|0.59929043|0.5…	1.1510505605349785e-12|1.1549960910821274e-08|9.592321861746576e-05|1.3744680725886661e-12|1.0|1.0|1.0|1.8421556204371017e-07|1.0|0.00916431497664693|1.0|1.0|1.0|1.5049178108894748e-05|1.0|1.0|1.0|1.0|1.0|1.0|0.00924519533329761|1.0|1.0|1.0|1.0|1.0|1.0|1.0|0.004284380911013384|1.0|1.0|1.0|1.0|1.0|1.0|1.0|1.0|1.0|1.0|1.0|1.0|1.0|1.0|1.0|1.0|1.0|0.0023953445981776404|1.0|1.0|1.0	2.877626401337446e-12|2.7112584297702523e-08|0.00020021056608341857|5.369015908549477e-12|1.0|1.0|1.0|6.059722435648361e-07|1.0|0.019415921560692648|1.0|1.0|1.0|5.4526007640922996e-05|1.0|1.0|1.0|1.0|1.0|1.0|0.021351490377130737|1.0|1.0|1.0|1.0|1.0|1.0|1.0|0.012527429564366617|1.0|1.0|1.0|1.0|1.0|1.0|1.0|1.0|1.0|1.0|1.0|1.0|1.0|1.0|1.0|1.0|1.0|0.009356814836631408|1.0|1.0|1.0	1	1
GO:1902232	PTPN2 FOXN1 TOX	3	regulation of positive thymic T cell selection	T-cell Development	PTPN2: - Protein tyrosine phosphatase, non-receptor type 2 (PTPN2) is a negative regulator of T-cell receptor (TCR) signaling. - PTPN2 dephosphorylates and inactivates kinases in the TCR signaling pathway, such as LCK and ZAP70. - PTPN2 is essential for maintaining T-cell homeostasis and preventing autoimmunity. FOXN1: - Forkhead box protein N1 (FOXN1) is a transcription factor crucial for thymic…	1	3	0.499829	480	0.960701	regulation of CAMKK-AMPK signaling cascade	0.107579	11222	0.0812183	T cell differentiation|T cell differentiation in thymus|pro-T cell differentiation|thymus development|T cell differentiation involved in immune response|lymphocyte differentiation|T cell lineage commitment|T-helper cell differentiation|extrathymic T cell differentiation|gamma-delta T cell differentiation|memory T cell differentiation|immune system development|hematopoietic or lymphoid organ devel…	0.90822065|0.8965013|0.8332378|0.8301367|0.81763244|0.78455|0.7813426|0.7765745|0.7680758|0.7628819|0.7606765|0.7422941|0.7321379|0.7249736|0.7204666|0.7193297|0.71806514|0.7141235|0.71157634|0.7078533|0.70630085|0.7062541|0.7057638|0.70495665|0.7024406|0.69936097|0.6952319|0.69122505|0.68542373|0.6832359|0.66944605|0.66915995|0.66183686|0.66103363|0.6587626|0.65761507|0.65600693|0.65456647|0.651…	5.043133840454378e-06|1.2621185707253705e-07|1.0|0.008375945139488614|1.0|1.4081924673426354e-05|8.869879252573753e-06|1.0|1.0|1.0|1.0|0.00040308598540693234|9.274189430801376e-05|1.0|1.8337304579039105e-09|1.0|3.4828971359710705e-09|2.4797036874562225e-08|0.02601926308549296|1.0819009701741276e-06|1.0|0.000349935842712393|4.1593132679060284e-05|1.0|0.004176982832635245|0.003146484119430881|0.006…	8.377298738296309e-06|2.7799968518179963e-07|1.0|0.01379892115237004|1.0|3.8370366957564995e-05|2.430103904814727e-05|1.0|1.0|1.0|1.0|0.0011717615854852685|0.00027117512955559576|1.0|1.041892305627222e-08|1.0|1.9032224786727163e-08|1.3051072039243276e-07|0.05731115217068934|4.226175664742686e-06|1.0|0.0011549037713280298|0.00014854690242521528|1.0|0.011866428501804673|0.008668000329010692|0.01784…	1	1
GO:0002423	CEACAM1 IL12B CD226 NECTIN2 PVR NKG7 CRTAM HAVCR2 CD160 IL12A	10	natural killer cell mediated immune response to tumor cell	Immune Cell Activation and Regulation	Proteins: CEACAM1, IL12B, CD226, NECTIN2, PVR, NKG7, CRTAM, HAVCR2, CD160, IL12A 1. Immune cell activation and cytokine production - IL12A and IL12B form a heterodimer, IL-12, which is a cytokine that promotes T cell and NK cell activation and differentiation. - NKG7 is involved in the cytotoxic granule exocytosis pathway, contributing to the killing of target cells by cytotoxic T cells and NK ce…	1	10	0.460803	756	0.938104	suckling behavior	0.295021	7368	0.396758	cell activation involved in immune response|regulation of cell activation|leukocyte activation involved in immune response|regulation of leukocyte activation|activation of immune response|regulation of lymphocyte activation|immune response-activating signaling pathway|regulation of T cell activation|regulation of immune response|immune effector process|immune response-activating cell surface rece…	0.81678057|0.7922795|0.76002157|0.75199443|0.7436769|0.74058795|0.7384419|0.73564255|0.73495734|0.7342473|0.73042464|0.72873735|0.72846186|0.72719616|0.72372043|0.72075397|0.71188456|0.7075672|0.7012087|0.69374335|0.69244885|0.6913573|0.6867423|0.68659604|0.6838151|0.6809852|0.67646533|0.67545116|0.6754037|0.67474145|0.67315316|0.67279506|0.6690854|0.6643859|0.6643021|0.66386116|0.6588583|0.65720…	1.7525878076440357e-05|1.5597258396053255e-10|1.662094856579955e-05|7.632045274057254e-11|3.4087215726730456e-06|1.0824603952277071e-07|1.4682458788968384e-06|1.987521657847747e-08|1.3700568590821792e-11|3.9912830046328096e-15|1.2969414200293207e-05|1.047162565207417e-14|1.336148646562157e-10|3.589208116538118e-05|4.017051317596529e-06|1.617482717951832e-09|0.024805463755202588|1.0701820412499067…	2.7556412069874776e-05|4.1262588349347236e-10|3.735044621527989e-05|2.6226959704664105e-10|8.808066079258516e-06|3.644647795379485e-07|4.2557851562227205e-06|7.28029911299541e-08|7.062148758155562e-11|2.4945518778955058e-14|4.1568635257350025e-05|7.172346337037104e-14|6.549748267461555e-10|0.0001254967872915426|1.6668262728616305e-05|9.086981561527146e-09|0.055369338739291486|8.493508263888149e-1…	1	1
GO:0097499	ROM1 ARL13B BBIP1 SPATA7 TTC21B TUB BBS4 PCARE ZDHHC3 GFY IFT80 ARL13A TULP1	13	protein localization to non-motile cilium	Ciliogenesis and Ciliary Function	1. ROM1 and SPATA7 interaction: ROM1 is a photoreceptor-specific protein involved in the structural organization of photoreceptor outer segments. SPATA7 is essential for the development and maintenance of photoreceptor cells. The interaction between ROM1 and SPATA7 suggests a role in photoreceptor outer segment organization and function. 2. ARL13B and TTC21B interaction: ARL13B is a small GTPase …	1	13	0.627984	35	0.997134	regulation of single stranded viral RNA replication via double stranded DNA intermediate	0.212651	9469	0.224742	cilium-dependent cell motility|cilium movement|cilium assembly|cilium organization|cilium movement involved in cell motility|motile cilium assembly|non-motile cilium assembly|ciliary body morphogenesis|intraciliary transport involved in cilium assembly|protein transport from ciliary membrane to plasma membrane|protein localization to cilium|epithelial cilium movement involved in extracellular flu…	0.81137544|0.8057316|0.80435|0.79108405|0.789575|0.77476984|0.77300227|0.7704273|0.7681862|0.7353905|0.71504205|0.71159387|0.70873046|0.6987597|0.6893127|0.6790581|0.67868423|0.67822254|0.6765947|0.67073756|0.670128|0.6690364|0.6687282|0.6658935|0.6652772|0.6641867|0.66241646|0.65813714|0.65494|0.65142524|0.6444328|0.6434689|0.63740325|0.6332071|0.6279839|0.6271088|0.6206745|0.61877656|0.61755395…	0.11411226264989509|0.13755933850624893|4.4757729110275065e-09|1.35105859065687e-10|0.10525450610581778|1.0|9.83353132944333e-10|1.0|1.0|1.0|2.6844192981798653e-32|1.0|1.0|1.0|1.0|1.0|1.0|0.007558543437326691|1.0|0.023260129501612336|0.03065619100083821|0.06899964472131596|8.238877489601673e-14|1.0|1.0|0.023260129501612336|0.09976301915213583|1.0|1.0|0.009815801386416734|1.0|1.0|1.0|1.0|5.6554768…	0.13161737329861026|0.17088116584627197|1.3048900615240543e-08|4.579859629345322e-10|0.1527641598052508|1.0|3.856286795860129e-09|1.0|1.0|1.0|3.0162014586290624e-31|1.0|1.0|1.0|1.0|1.0|1.0|0.018709265934404626|1.0|0.04708528239278272|0.0629490574965877|0.14226730870374427|6.057998154118876e-13|1.0|1.0|0.05472971647438197|0.21226174287688473|1.0|1.0|0.02983526257269524|1.0|1.0|1.0|1.0|1.6633755357…	1	1
GO:0071863	MAP3K3 HMGA2 SETD4 PTH LEF1 FGFR2	6	regulation of cell proliferation in bone marrow	MAPK Signaling Pathway Activation	1. MAP3K3 involvement: - MAP3K3 is a mitogen-activated protein kinase kinase kinase (MAP3K) that plays a crucial role in the MAPK signaling pathway. - This pathway regulates various cellular processes, including cell proliferation, differentiation, and apoptosis. - MAP3K3 activates downstream kinases, such as MAP2Ks and MAPKs, leading to the phosphorylation of transcription factors and other targ…	1	6	0.266918	2303	0.811446	somatic diversification of immunoglobulins	0.161773	8610	0.295071	positive regulation of MAPK cascade|positive regulation of stress-activated MAPK cascade|positive regulation of JNK cascade|positive regulation of stress-activated protein kinase signaling cascade|positive regulation of MAP kinase activity|positive regulation of p38MAPK cascade|MAPK cascade|stress-activated MAPK cascade|positive regulation of ERK1 and ERK2 cascade|positive regulation of ERK5 casc…	0.93228716|0.8497712|0.8142483|0.80533326|0.8015131|0.79893297|0.7777784|0.7673836|0.762346|0.7320025|0.72389007|0.71396345|0.7091086|0.7034494|0.68895787|0.6829988|0.6744856|0.6637138|0.6620013|0.6610355|0.6487094|0.61744404|0.615414|0.5988183|0.5965328|0.5883417|0.5769448|0.5769018|0.5762472|0.5733516|0.57221353|0.57160485|0.5708761|0.56582016|0.56454074|0.5627142|0.5576725|0.5561007|0.5493474|…	0.011151382615402411|0.043972911803647825|1.0|0.04464698123492581|1.0|0.009760272979582964|0.026850385713202113|0.08046338010640061|0.0735881669285489|1.0|0.0830712993600921|1.0|1.0|0.018752173922232527|0.020950071477385458|1.0|1.0|1.0|0.1094489992550341|0.06633967049667713|0.06733087572102732|1.0|0.014956248782920054|1.0|1.0|1.0|1.0|1.0|1.0|1.0|1.0|1.0|0.0012286791662993234|1.0|1.0|0.00079545480…	0.0138012161081713|0.056739241036964934|1.0|0.06575402243729868|1.0|0.018174114880772297|0.04467618255108505|0.1259207826391246|0.12709574631889944|1.0|0.1384521656001535|1.0|1.0|0.04185753107641189|0.04624739840482441|1.0|1.0|1.0|0.2180258949303468|0.12516918961637194|0.12973193780544762|1.0|0.03514224206895952|1.0|1.0|1.0|1.0|1.0|1.0|1.0|1.0|1.0|0.0041791808377528005|1.0|1.0|0.00292446620418991…	1	1
GO:0060716	PLCD3 WNT2 VASH2 CCN1 FZD5 VASH1 JUNB NSDHL HS6ST1 GGNBP2 OVOL2 HEY1 FBXW8 HEY2 MAPK1 AKT1 PLG RBPJ HES1 TMED2	20	labyrinthine layer blood vessel development	Wnt Signaling Pathway	The most prominent biological process performed by this system of interacting proteins is the Wnt signaling pathway. This pathway is crucial for cell proliferation, differentiation, and migration during embryonic development and tissue homeostasis. 1. WNT2 and FZD5 interaction: WNT2 is a ligand for the Wnt signaling pathway, and FZD5 is a receptor for Wnt ligands. The interaction between WNT2 and…	1	20	0.314284	3377	0.723514	negative regulation of muscle tissue development	0.168428	10622	0.130342	Wnt signaling pathway|canonical Wnt signaling pathway|cell-cell signaling by wnt|non-canonical Wnt signaling pathway|Wnt signaling pathway, calcium modulating pathway|regulation of Wnt signaling pathway|positive regulation of Wnt signaling pathway|regulation of non-canonical Wnt signaling pathway|canonical Wnt signaling pathway involved in regulation of cell proliferation|Wnt signaling pathway, p…	0.9999999|0.9190836|0.90107286|0.8886236|0.82764864|0.8265207|0.8005681|0.76815945|0.7648002|0.7590256|0.7427521|0.7407475|0.7232201|0.7212118|0.720903|0.7202718|0.719818|0.7129217|0.7117807|0.68580085|0.6621746|0.6537244|0.65139467|0.6499417|0.64029896|0.63813245|0.636315|0.62625533|0.6254454|0.6213274|0.620403|0.6199087|0.60825986|0.60199237|0.59726644|0.5922562|0.5884378|0.5858413|0.58567303|0…	0.013748622155475324|0.0047151661232309895|0.013917153913846339|0.0818415039738159|1.0|0.31410116998608106|0.15132133851787957|1.0|1.0|1.0|1.0|0.2502534463209547|1.0|1.0|0.012760848473777594|1.0|1.0|0.11463500884060292|1.0|1.5579473907162884e-06|1.0|0.005819689748325886|1.0|1.0|0.0007801480800319564|1.0|1.0|1.0|1.0|0.0092960441178717|1.0|0.01237582574972621|1.0|1.0|1.0|1.0|1.0|0.00135421619784156…	0.01684880166112172|0.006893517724021914|0.021644096289030076|0.11592281016121232|1.0|0.4780839725815541|0.23173252452967774|1.0|1.0|1.0|1.0|0.44768058375841624|1.0|1.0|0.03004994905506403|1.0|1.0|0.21876910084084525|1.0|5.969147090867006e-06|1.0|0.015604202564525679|1.0|1.0|0.002574746138719328|1.0|1.0|1.0|1.0|0.02851547275420767|1.0|0.032653893798749896|1.0|1.0|1.0|1.0|1.0|0.004685869196683623|…	1	1
GO:0060117	TMC1 STRC SEC24B PAFAH1B1 PLS1 PDZD7 CLRN1 SLC4A7 SOD1 KCNQ1 SCRIB SLITRK6 TPRN TRIOBP LRTOMT LHFPL5 MYO7A SLC9A3R1 WDPCP WHRN GRXCR2 CLRN2 CDH23	23	auditory receptor cell development	Hair Cell Mechanotransduction	The most prominent biological process performed by this system of interacting proteins is hair cell mechanotransduction, which is essential for hearing and balance. This process involves the conversion of mechanical stimuli into electrical signals in the inner ear. 1. TMC1 and TPRN: TMC1 is a transmembrane protein that plays a crucial role in mechanotransduction by forming the mechanotransduction…	1	23	0.557708	25	0.997953	bone resorption	0.282724	7885	0.354429	hair cell differentiation|neuromast hair cell development|mechanosensory behavior|cellular response to mechanical stimulus|detection of mechanical stimulus involved in sensory perception of sound|mechanoreceptor differentiation|auditory receptor cell morphogenesis|stereocilium maintenance|outer hair cell apoptotic process|inner ear auditory receptor cell differentiation|inner ear receptor cell di…	0.73271084|0.72746485|0.6472317|0.62787676|0.62770617|0.6253892|0.61496025|0.6049767|0.60472196|0.6043973|0.60418224|0.6017981|0.59717023|0.59554845|0.59491104|0.59125483|0.57821023|0.5651764|0.5628917|0.5615903|0.5603508|0.55994606|0.5578066|0.55771565|0.55770785|0.55742097|0.5569243|0.5566268|0.5545704|0.5538316|0.55254966|0.54992354|0.5496624|0.54899305|0.54806817|0.5480372|0.54746103|0.547429…	3.8138076148115846e-61|1.0|0.01730581299323415|1.0|1.422525636992226e-14|5.735864118448122e-58|1.3265245301096707e-56|5.160209195136818e-06|1.0|2.1752273004667264e-63|6.4500117623529645e-59|8.853028228590362e-09|1.0|1.0|4.44932856900504e-63|6.317286078013568e-11|1.0|9.336279576121756e-40|1.0|1.0|1.0|4.535498109061658e-12|9.2662637725877e-50|1.0|1.0807957742807854e-75|1.074139731315261e-40|1.0|1.0…	2.74374648547596e-60|1.0|0.026583430097133872|1.0|6.585766837926972e-14|7.260587491706483e-57|1.979887358372643e-55|1.4701450698395492e-05|1.0|4.265151569542601e-62|1.4333359471895476e-57|4.175956711599228e-08|1.0|1.0|1.1408534792320615e-61|4.0495423577010053e-10|1.0|1.6379437852845186e-38|1.0|1.0|1.0|3.3105825613588745e-11|2.3759650698942824e-48|1.0|2.4563540324563307e-74|2.106156335912277e-39|1…	1	1
GO:0010801	SIRT2 DDIT4 SMAD7 SPRED1 CALM2 DGKQ CALM3 SPRY2 TTC36 SPRED2 PPEF2 CADM4 PARD3 EIF4G1 INPP5K CALM1 DMTN	17	negative regulation of peptidyl-threonine phosphorylation	Negative Regulation of Cellular Signaling	The most prominent biological process performed by this system of interacting proteins is the negative regulation of cellular signaling pathways. This process is crucial for maintaining cellular homeostasis and preventing aberrant signaling that could lead to diseases such as cancer. 1. SIRT2: Sirtuin 2 is a NAD+-dependent deacetylase that regulates various cellular processes, including cell cycl…	0.764706	13	0.435467	387	0.968315	cilium organization	0.129496	10265	0.159571	negative regulation of signaling|negative regulation of signal transduction|negative regulation of intracellular signal transduction|extracellular negative regulation of signal transduction|regulation of signaling|negative regulation of signaling receptor activity|regulation of signal transduction|regulation of intracellular signal transduction|cell-cell signaling|negative regulation of small GTP…	0.9172567|0.87328887|0.85616463|0.8002701|0.7799242|0.7734636|0.75948894|0.7553477|0.724295|0.7064185|0.70406795|0.7023122|0.69791114|0.6961329|0.6903492|0.68285006|0.6756582|0.6684705|0.6483773|0.64703405|0.64657044|0.64417326|0.63490826|0.63380015|0.63347834|0.632529|0.6319469|0.6270742|0.62658584|0.6249465|0.6241747|0.6231724|0.6199934|0.61574554|0.6139295|0.6100129|0.6058502|0.6010748|0.60059…	1.737685330710011e-05|9.738956166584236e-06|6.086505747250616e-06|1.0|6.654558000707771e-07|1.0|1.5279080387945851e-07|6.480012167169787e-08|0.223953710633281|0.05506446434728877|1.0|0.0806483817650309|1.737685330710011e-05|0.048459266783363535|1.0|1.0|1.64151290936498e-05|1.7333350741340925e-09|1.0|6.89876512515953e-07|5.817731340138133e-06|0.03533412826981152|0.00013084074897793877|6.7620454615…	2.7408285973344024e-05|1.816969434064223e-05|1.408913367419124e-05|1.0|1.8640218489377511e-06|1.0|4.881495331612094e-07|2.2500042247117318e-07|0.37576125945181377|0.10122144181486906|1.0|0.15332391970538195|5.5517103217572236e-05|0.10053789789079572|1.0|1.0|6.194388337226339e-05|1.0441777555024654e-08|1.0|2.7053980882978547e-06|2.2120651483414953e-05|0.07869516318443545|0.00044202955735790124|0.0…	0.342821	1
GO:0050691	USP17L2 IFNLR1 TNFAIP3 LILRB1 IL12B TARBP2 MMP12 RIGI MUL1 IL23R PQBP1 IL15 IL23A HSP90AA1 IL1B ZDHHC1 EIF2AK4 PTPN22 TOMM70 TRIM6 STAT1 ZC3H12A APOBEC3F ZDHHC11 CGAS MAVS TRAF3IP2 DTX3L TRIM44 APOBEC3G IL4 STING1 PYCARD PARP9 SELENOK IL12RB1 IL27 MICB RNF216 SIN3A AIM2 DHX9	42	regulation of defense response to virus by host	Antiviral Immune Response	The system of interacting proteins primarily performs the biological process of antiviral immune response. This process involves the recognition of viral pathogens, activation of immune signaling pathways, and the regulation of immune responses. 1. Recognition of viral pathogens: RIG-I (retinoic acid-inducible gene I) and cGAS (cyclic GMP-AMP synthase) are key proteins involved in the recognition…	0.452381	19	0.680039	13	0.998936	epithelial cell proliferation involved in salivary gland morphogenesis	0.248189	6591	0.460373	antiviral innate immune response|defense response to virus|response to virus|innate immune response|cellular response to virus|response to type I interferon|response to type II interferon|regulation of defense response to virus|cellular response to type I interferon|cellular response to type II interferon|interferon-mediated signaling pathway|immune response|regulation of defense response to viru…	0.9626644|0.8231578|0.81394994|0.7285304|0.7255257|0.71055496|0.6971864|0.6951179|0.6911454|0.6835994|0.6827514|0.6824235|0.6800387|0.6782617|0.6701412|0.6670065|0.66599894|0.66273165|0.6627007|0.6614311|0.6596819|0.65690124|0.6560348|0.65253097|0.6522012|0.6500731|0.6492867|0.6441828|0.64344215|0.641749|0.6407621|0.63949907|0.6376537|0.6326015|0.6304519|0.628432|0.62607574|0.6256189|0.6248553|0.…	2.6693304833951935e-05|1.3002007027302865e-75|3.5783706243216646e-70|8.243481538163461e-33|3.35742480326686e-08|4.544220675460652e-08|2.4970202101508942e-05|2.1098910420589332e-104|2.867995411136402e-08|0.00020799721989523233|1.0097608174972173e-10|1.3187356858932804e-34|2.1663618088514035e-127|0.021837483858951682|1.6279955760193642e-12|7.085026027579178e-43|2.12051001372709e-08|1.97792487599909…	4.143483106236125e-05|1.3686323186634594e-74|4.708382400423243e-69|6.245061771335955e-32|1.052484264346978e-07|1.5562399573495386e-07|6.45224860504107e-05|1.0047100200280634e-102|1.1658517931448788e-07|0.0005591323115463235|5.151840905598047e-10|1.9682622177511648e-33|1.140190425711265e-125|0.04810018471134732|1.1384584447687863e-11|1.6102331880861768e-41|1.087441032680559e-07|1.4760633402978298e…	1	1
GO:0045869	AICDA RESF1 SETDB1 APOBEC3A_B MORC2 TRIM28 APOBEC3C APOBEC3B INPP5K HMGA2 TASOR APOBEC3H MPHOSPH8 APOBEC3F APOBEC3G APOBEC3A	16	negative regulation of single stranded viral RNA replication via double stranded DNA intermediate	APOBEC-mediated DNA Deamination	The primary biological process performed by this system of interacting proteins is APOBEC-mediated DNA deamination, which plays a crucial role in innate immunity and genome stability. The APOBEC family of proteins (APOBEC3A, APOBEC3B, APOBEC3C, APOBEC3F, APOBEC3G, APOBEC3H) are cytidine deaminases that catalyze the conversion of cytosine to uracil in single-stranded DNA (ssDNA). This process can …	0.9375	15	0.30806	3953	0.676355	cholesterol homeostasis	0.266117	6588	0.460619	adenosine to inosine editing|DNA cytosine deamination|cytidine deamination|antibody-dependent cellular cytotoxicity|base conversion or substitution editing|cytidine to uridine editing|nuclear-transcribed mRNA catabolic process, endonucleolytic cleavage-dependent decay|DNA deamination|box C/D RNA 3'-end processing|activation-induced cell death of T cells|nuclear polyadenylation-dependent CUT catab…	0.61540836|0.6136144|0.60674703|0.6043837|0.5889683|0.58046675|0.5633739|0.5559429|0.54878736|0.5416502|0.53725487|0.5346272|0.53367794|0.5309082|0.52914774|0.52747774|0.5218715|0.51794314|0.5142697|0.51367533|0.51169604|0.50690913|0.5053129|0.5041114|0.5027966|0.5011102|0.49127686|0.49104565|0.48985738|0.489164|0.48820817|0.4881681|0.48802644|0.48754516|0.48749128|0.48713183|0.48618788|0.4847266…	1.0|6.26283220075634e-25|3.440271057992119e-23|1.0|5.2377367774628056e-21|3.440271057992119e-23|1.0|8.94099238429651e-23|1.0|1.0|1.0|1.0|1.0|1.0|1.0|1.0|1.0|1.0|1.0|1.0|1.0|1.0|1.0|1.0|1.0|1.0|1.0|1.0|1.0|1.0|1.0|1.0|1.0|1.0|1.0|1.0|1.0|0.039399175663819924|1.0|1.0|1.0|1.0|1.0|1.0|1.0|1.0|1.0|1.0|1.0|1.0	1.0|2.758956916632749e-24|1.8202492370328672e-22|1.0|3.2133354462961996e-20|2.1236241098716783e-22|1.0|7.328682282210255e-22|1.0|1.0|1.0|1.0|1.0|1.0|1.0|1.0|1.0|1.0|1.0|1.0|1.0|1.0|1.0|1.0|1.0|1.0|1.0|1.0|1.0|1.0|1.0|1.0|1.0|1.0|1.0|1.0|1.0|0.09292258411278284|1.0|1.0|1.0|1.0|1.0|1.0|1.0|1.0|1.0|1.0|1.0|1.0	1	1
GO:0002092	APELA AHI1 DTNBP1 SELE ARRB2 AP2M1 ANGPT1 MAGI2 INSR PCSK9 SFRP4 ATAD1 SCYL2 NTF3 CD63 WNT3A DRD2 PLCG2 TBC1D5 EGF SYK VEGFA ARRB1 FMR1 GREM1 PICK1 GH1 APLN	28	positive regulation of receptor internalization	Angiogenesis and Neurodevelopment Regulation	The system of interacting proteins primarily involves the regulation of angiogenesis and neurodevelopment. Angiogenesis is the formation of new blood vessels from pre-existing ones, while neurodevelopment refers to the growth and development of the nervous system. 1. Angiogenesis regulation: Key proteins involved in this process include ANGPT1, VEGFA, and EGF. ANGPT1 (Angiopoietin-1) is essential…	0.642857	18	0.237172	10174	0.167021	dUMP biosynthetic process	0.246083	9851	0.193467	regulation of angiogenesis|regulation of vasculature development|regulation of sprouting angiogenesis|vasculature development|regulation of vasculogenesis|angiogenesis|regulation of endothelial cell development|regulation of vascular wound healing|blood vessel development|regulation of blood vessel remodeling|endothelium development|blood vessel remodeling|blood vessel maturation|regulation of en…	0.7577661|0.7402234|0.7242777|0.69526|0.6915788|0.68563414|0.6821604|0.66939294|0.6607312|0.6588454|0.65437615|0.64633185|0.64300865|0.6419768|0.6404634|0.6327604|0.63195705|0.6305612|0.6296767|0.6292217|0.62902236|0.62696993|0.6251836|0.62499607|0.61813056|0.61695415|0.6127566|0.61179006|0.6112111|0.6109253|0.6094691|0.6076531|0.6074731|0.6068718|0.6050265|0.6040561|0.60150105|0.60099214|0.59741…	0.010848024444130902|0.011265553501244651|0.06182136774483461|0.00012876927626820898|1.0|1.6010692968679686e-05|0.029005974136225857|1.0|9.892002850890942e-05|1.0|0.19605594013502928|1.0|1.0|1.0|0.00034452822759713583|0.10831605755642391|1.0|0.14979396996558708|1.0|4.4358047500359336e-05|6.040135815912717e-07|0.04320302449680158|1.0|1.0|0.0032636863773028903|0.007512798081417145|0.032178322034316…	0.013442409472281166|0.01569018593488113|0.08781444281936736|0.00026771159307319956|1.0|4.2924109835602376e-05|0.047550777272501406|1.0|0.0002644920548366562|1.0|0.3157100485266172|1.0|1.0|1.0|0.0010536031424988864|0.19984512464284854|1.0|0.278427453467634|1.0|0.00014037356803911182|2.4856525991410355e-06|0.09412423637647402|1.0|1.0|0.0097004129300251|0.01916530122810496|0.07760509087407944|0.048…	1	1
GO:0046385	DCK DCTD TBPL1 RRM1 CMPK2 RRM2 DUT ADK DTYMK DGUOK RRM2B LOC100506422 TYMS GUK1 AK5 SHMT1	16	deoxyribose phosphate biosynthetic process	Deoxyribonucleotide Synthesis and Metabolism	The primary biological process performed by this system of interacting proteins is deoxyribonucleotide synthesis and metabolism, which is crucial for DNA replication and repair. The proteins involved in this process are: 1. DCK (deoxycytidine kinase) - Catalyzes the phosphorylation of deoxycytidine, contributing to the nucleotide salvage pathway. This enzyme is essential for the activation of nuc…	1	16	0.628318	60	0.995088	regulation of epidermal cell division	0.326191	3877	0.682577	deoxyribonucleotide metabolic process|2'-deoxyribonucleotide metabolic process|deoxyribonucleotide biosynthetic process|deoxyribonucleoside metabolic process|2'-deoxyribonucleotide biosynthetic process|DNA metabolic process|ribonucleotide metabolic process|nucleic acid metabolic process|deoxyribonucleotide catabolic process|nucleoside metabolic process|deoxyribonucleoside monophosphate metabolic …	0.9354525|0.87719744|0.87696314|0.8508968|0.8046832|0.8024045|0.78852403|0.784359|0.7810108|0.78060174|0.7731669|0.7659142|0.7576317|0.7375299|0.7321793|0.7226341|0.7148448|0.7148248|0.7041307|0.70369256|0.70355344|0.70215034|0.70147943|0.69563854|0.68826485|0.68462557|0.68091786|0.6799948|0.6778649|0.6765001|0.6759448|0.6731007|0.6705047|0.6650481|0.6619479|0.6599409|0.65762323|0.6555198|0.65420…	2.444070941279263e-43|1.5750679399719685e-43|3.779726368240596e-55|4.468851123861902e-05|3.779726368240596e-55|0.0019806695385372595|4.700301349551911e-05|0.30872125759930974|0.0003266659347959373|1.793483846377971e-05|7.476524031585705e-20|7.476524031585705e-20|3.539275621027232e-24|2.1766650148130355e-12|3.1301166370112452e-24|7.576861006290258e-12|5.2324753559298405e-05|6.450837313992003e-06|2…	1.3428961215820127e-42|1.0096589358794669e-42|3.896625121897522e-54|9.693820225296967e-05|4.724657960300745e-54|0.00420524318160777|0.00011634409281069086|0.4628504611683804|0.0008207686803918022|5.385837376510423e-05|5.751172331989003e-19|6.282793303853534e-19|3.7651868308800346e-23|1.4043000095567972e-11|3.32991131596941e-23|5.412043575921612e-11|0.00018295368377377067|2.5598560769809536e-05|5.…	1	1
GO:0035627	ABCA12 SGPP1 OSBP PSAP PLTP ABCA2 CERT1 ABCB1 ABCB4 CPTP ABCA13 PLEKHA8 GLTP VAPA MTTP PLEKHA3	16	ceramide transport	Lipid Transport and Homeostasis	The primary biological process performed by this system of interacting proteins is lipid transport and homeostasis. This conclusion is based on the following observations: 1. Presence of ATP-binding cassette (ABC) transporters: ABCA12, ABCA2, ABCA13, ABCB1, and ABCB4 are all members of the ABC transporter family, which are known to play crucial roles in lipid transport across cellular membranes. …	1	16	0.522776	258	0.978877	regulation of cardiac muscle contraction by calcium ion signaling	0.281908	6803	0.443016	lipid homeostasis|lipid transport|regulation of lipid transport|intracellular lipid transport|triglyceride homeostasis|cellular triglyceride homeostasis|regulation of intracellular lipid transport|lipid metabolic process|lipid transport involved in lipid storage|lipid translocation|lipoprotein transport|response to lipid|cellular lipid metabolic process|regulation of lipid storage|phospholipid ho…	0.907878|0.8711457|0.8292948|0.8264058|0.82586735|0.8202623|0.81969744|0.8082241|0.79299736|0.7817503|0.7577872|0.7542193|0.7521323|0.7500465|0.75002885|0.74679804|0.74329376|0.7428276|0.7422316|0.73199964|0.7298769|0.72564197|0.7254559|0.7253804|0.72437423|0.71882164|0.71722996|0.7170688|0.7160241|0.7138697|0.7085401|0.7074686|0.70577633|0.70556426|0.6985612|0.6962784|0.6914811|0.6896266|0.68954…	2.4322616048301634e-07|1.5978888808899323e-26|1.2321433190388166e-07|2.7300938574923277e-12|1.0|1.0|2.928253254815838e-05|1.0854292839516153e-10|1.0|1.9390519198900802e-07|0.014833858175939298|0.20596022505551234|2.4341029039619765e-09|1.0|1.0|0.12299653626923931|0.4296534809979798|1.0|0.006515393376067063|0.09109462931758923|9.08087815387033e-26|0.11553712971657726|0.03813368353722463|3.11479756…	4.343324294339577e-07|7.432041306464802e-26|3.3033332950102324e-07|1.0500360990355106e-11|1.0|1.0|7.470033813305709e-05|4.781626801548966e-10|1.0|6.876070637908087e-07|0.028692182158489937|0.37109950460452673|1.0675889929657792e-08|1.0|1.0|0.22444623406795494|0.7912587127034618|1.0|0.01608739105201744|0.1690067334278093|1.0319179720307193e-24|0.23153733410135724|0.08096323468625187|1.442035907448…	1	1
GO:0009187	PDE5A PDE9A GUCY2C PDE7B ADCY10 ADCY9 ADCY4 PDE4D GUCY2F CACNB4 NPPA EPHA2 PDE4C PDE4A ADCY3 ADCY5 GUCY1A1 PTH PDE7A PDE8B NPR2 PDE2A GUCY1B1 ADCY7 GUCY1A2 AMPD2 NPPC ADCY1 PDE4B NPPB NPR1 PTHLH PDE8A ADCY8 CNP GUCY2D ADCY6 RORA ADCY2 PDE10A	40	cyclic nucleotide metabolic process	Cyclic Nucleotide Signaling	The primary biological process performed by this system of interacting proteins is cyclic nucleotide signaling, which plays a crucial role in regulating various cellular functions, including cell growth, differentiation, and apoptosis. 1. Predominance of PDE and ADCY proteins: The presence of multiple phosphodiesterase (PDE) and adenylate cyclase (ADCY) proteins (PDE2A, PDE4A, PDE4B, PDE4C, PDE4D…	0.975	39	0.813091	5	0.999591	regulation of histone deacetylation	0.38065	3063	0.749222	cyclic-nucleotide-mediated signaling|cyclic nucleotide biosynthetic process|G protein-coupled receptor signaling pathway, coupled to cyclic nucleotide second messenger|cyclic nucleotide transport|cyclic nucleotide metabolic process|cAMP-mediated signaling|cGMP-mediated signaling|cyclic purine nucleotide metabolic process|nitric oxide-cGMP-mediated signaling pathway|cyclic nucleotide catabolic pro…	0.9866396|0.8732559|0.87081707|0.8308028|0.8130913|0.8035697|0.7986127|0.7641568|0.7465075|0.7409297|0.7178086|0.7134723|0.706806|0.6984155|0.6954156|0.695052|0.6944949|0.6926099|0.6870731|0.68488646|0.6792586|0.67889374|0.67752105|0.66929066|0.6610279|0.6594733|0.6534443|0.6516409|0.64838934|0.64591676|0.64549166|0.644547|0.6429237|0.64030755|0.6402384|0.63992864|0.6317513|0.6314887|0.6310004|0.…	6.277117307686738e-32|8.22213744434057e-59|1.0|1.0|3.680599900879444e-122|2.3078629280941105e-09|1.5204616897581764e-26|6.2960341904664115e-118|3.174985687865447e-05|6.80536130851403e-36|0.0020705799408011357|1.0|0.11660603771570328|0.07641524915920307|5.440183825347762e-06|1.4052389852881545e-27|1.0|0.18622506618660992|1.0|0.013918875386427413|3.905939433345795e-05|0.02669928892826522|1.05144227…	2.6940417629556816e-31|7.212401266965411e-58|1.0|1.0|8.977072928974254e-121|8.842386697678584e-09|1.23614771525055e-25|3.313702205508638e-116|9.123522091567376e-05|8.299221107943938e-35|0.00473816920091793|1.0|0.20529231992201286|0.15222161187092245|2.220483194019495e-05|2.1619061312125452e-26|1.0|0.34232548931362117|1.0|0.029741186723135495|0.00013240472655409475|0.061377675697161425|6.333989590…	1	1
GO:0002043	BMP4 ITGB1BP1 APELA PPP1R16B IL12B GATA2 MMRN2 DLL4 IL12A NRARP JCAD APLNR EPHA2 ACVRL1 AGTR1 FGF2 THBS1 FGFBP1 PDCD10 SEMA5A VEGFA NGFR HMOX1 BMPER	24	blood vessel endothelial cell proliferation involved in sprouting angiogenesis	Angiogenesis Regulation	The most prominent biological process performed by this system of interacting proteins is the regulation of angiogenesis. Angiogenesis is the formation of new blood vessels from pre-existing ones, which is crucial for various physiological processes such as wound healing, embryonic development, and tissue repair. 1. Key proteins involved in angiogenesis: VEGFA, FGF2, BMP4, DLL4, and THBS1 are wel…	0.958333	23	0.616904	43	0.996479	regulation of steroid hormone biosynthetic process	0.298956	6543	0.464303	regulation of angiogenesis|regulation of sprouting angiogenesis|angiogenesis|regulation of vasculogenesis|regulation of blood vessel remodeling|regulation of vasculature development|regulation of vascular wound healing|blood vessel remodeling|positive regulation of angiogenesis|regulation of blood vessel endothelial cell proliferation involved in sprouting angiogenesis|angiogenesis involved in wo…	0.96088314|0.8653412|0.8207574|0.81031954|0.77617645|0.7640965|0.7502924|0.7491588|0.7473809|0.7420914|0.7084826|0.704408|0.7036404|0.70229065|0.6942389|0.694046|0.6861436|0.6823939|0.68052727|0.6780722|0.6731369|0.67313147|0.6729592|0.6713199|0.667112|0.661926|0.66128933|0.6499671|0.648685|0.6456952|0.643984|0.6436535|0.64355624|0.64184535|0.6409081|0.63951993|0.6322609|0.630236|0.6253995|0.6234…	1.4374703219196924e-19|1.209407578217732e-11|2.5063135731471717e-37|1.0|1.0|1.7525581056520435e-19|1.0|0.001637405144832157|9.147935726994272e-17|1.2983264086759033e-52|0.0006452242260991455|1.0|0.065114362599685|1.0|0.008550276054716142|1.0|0.0005524171182618916|1.0|6.899779048942339e-42|0.011146151676562965|9.142375315717e-53|3.1370755949172864e-24|0.024911478059493404|0.04872155441374154|7.642…	4.577930961527683e-19|3.4067819104724846e-11|2.0543553878255508e-36|1.0|1.0|9.845832054224964e-19|1.0|0.003425533775799492|6.139554179190787e-16|2.2384938080619022e-51|0.001605035388306332|1.0|0.11796080181102354|1.0|0.020905320427178832|1.0|0.001668933892029884|1.0|1.4374539685296539e-40|0.024230764514267315|1.6930324658735184e-51|3.7796091505027544e-23|0.0556059778113692|0.10661171644144757|9.5…	1	1
GO:0150077	NUPR1 CST7 MMP3 LRRK2 DAGLA IL18 MMP9 IGF1 STAP1 IL1B TREM2 CD200R1L CCL3 CD200 TAFA3 NR1D1 ATM TNFRSF1B PTGS2 PLCG2 CD200R1 IL33 GRN IL4 CTSC TNF SYT11 LDLR TTBK1 IL6 PTPRC MMP8 CX3CL1 SPHK1	34	regulation of neuroinflammatory response	Inflammation and Extracellular Matrix Remodeling	The primary biological process performed by this system of interacting proteins is inflammation and extracellular matrix remodeling. This is supported by the presence of several key proteins involved in these processes. 1. Inflammation: The presence of cytokines and chemokines such as IL18, IL1B, IL33, IL4, IL6, TNF, and CCL3 indicates a role in inflammatory processes. These proteins are known to…	0.647059	22	0.612729	19	0.998444	replication fork processing	0.349433	4898	0.598985	inflammatory response|chronic inflammatory response|tissue remodeling|wound healing involved in inflammatory response|neuroinflammatory response|inflammatory response to wounding|connective tissue replacement involved in inflammatory response wound healing|extracellular matrix-cell signaling|regulation of inflammatory response|production of molecular mediator involved in inflammatory response|reg…	0.70654726|0.7008245|0.6969899|0.6968675|0.6961266|0.66831934|0.6670078|0.66327405|0.653711|0.6408454|0.6303347|0.6222383|0.6214483|0.6211123|0.6207603|0.6197437|0.6182581|0.6170897|0.6127285|0.60985774|0.6073122|0.6062673|0.597425|0.5964962|0.59646374|0.58996403|0.58975375|0.5857363|0.5850121|0.582776|0.577412|0.57690734|0.5761101|0.5753213|0.5746733|0.5742732|0.5724241|0.57111156|0.56926924|0.5…	2.4720503403379875e-46|0.0006390784935589451|0.043167289338095265|1.0|9.50251217411174e-87|0.029348701802724624|1.0|1.0|7.233805766656517e-58|2.0205387072743433e-05|0.00017007133598352918|3.3706747678653676e-05|0.009185977644406687|6.621664055902155e-10|0.02741841320493714|1.0|7.0667165599619195e-06|0.00987732657757758|3.339717542091037e-106|1.0|0.008945349819880528|8.296922683597246e-08|0.005937…	1.4541472590223454e-45|0.001017640913310422|0.06211120768071261|1.0|1.6105952837477525e-85|0.04932554924827668|1.0|1.0|1.2917510297600923e-56|6.0314588276846065e-05|0.00046215036952045973|0.00010803967166652531|0.019712398378555124|3.658377931437655e-09|0.05921903499986423|1.0|2.7821718740007557e-05|0.023743573503792262|1.6698587710455184e-104|1.0|0.020713487737645583|4.127822230645396e-07|0.0151…	1	1
GO:0072677	HRH1 PTGER4 SCG2 CCL4L2 ADAM8 CCL7 CCL26 CCL3 CCL11 CCL4 LGALS3 CCL4L1 DAPK2 CCL21 CD300A CCL2 CCL1 CCL24 IL4 CCL13 CCL8 CCL5 EPX CX3CL1	24	eosinophil migration	Chemotaxis and Inflammation Regulation	1. Chemokine involvement: The majority of the proteins in this system are chemokines (CCL1, CCL2, CCL3, CCL4, CCL4L1, CCL4L2, CCL5, CCL7, CCL8, CCL11, CCL13, CCL21, CCL24, CCL26, and CX3CL1). Chemokines are small cytokines that play a crucial role in the recruitment and activation of immune cells, such as leukocytes, to sites of inflammation or injury. 2. Receptor interactions: HRH1 and PTGER4 ar…	1	24	0.546034	273	0.977649	regulation of viral genome replication	0.313854	7944	0.349599	chemotaxis|leukocyte chemotaxis involved in inflammatory response|regulation of chemotaxis|regulation of leukocyte chemotaxis|cell chemotaxis|leukocyte chemotaxis|regulation of neutrophil chemotaxis|regulation of monocyte chemotaxis|regulation of granulocyte chemotaxis|positive chemotaxis|cellular response to chemokine|monocyte chemotaxis|regulation of inflammatory response|regulation of chronic …	0.81406486|0.8085606|0.7987259|0.78162044|0.76703626|0.76526654|0.7592562|0.7466417|0.74021244|0.7338897|0.73292875|0.7326039|0.72855765|0.7239262|0.72360814|0.7194996|0.7176572|0.7172909|0.71489954|0.7122022|0.7082325|0.7070151|0.70644665|0.7058897|0.70378524|0.6988142|0.696122|0.6932545|0.6920345|0.6894075|0.6857822|0.683899|0.6773286|0.6770595|0.67687774|0.67665434|0.6744205|0.6735426|0.672805…	7.19020932991784e-28|1.0|3.1830412331838157e-15|5.181890888444585e-14|3.7273911050812095e-34|1.0263224616620433e-36|0.0009656307154957609|0.0007450533188628737|7.642571734095463e-07|2.4870925674705164e-08|1.285328275770704e-28|1.4291611949714825e-33|2.5788423373902476e-08|8.393224737284333e-05|8.634886782167737e-13|0.03849306187253594|4.1223275514953666e-16|0.016674482770868762|0.0069803694614694…	2.7548694750643065e-27|1.0|1.2581190644995318e-14|2.1681551834496172e-13|3.358010004577666e-33|8.697647980186808e-36|0.0020415025697584797|0.001626753971316318|2.5732564761264185e-06|9.565740644117371e-08|1.3115594650721469e-27|2.0129030915091304e-32|1.039855781205745e-07|0.00027766405467984177|6.21214876414945e-12|0.07823793063523565|3.523356881619971e-15|0.03850919808514726|0.017025291369437767…	0.112513	1
GO:0060231	BMP4 PAX8 WT1 PELO WNT9B CTNNB1 CITED1 GATA3 PAX2 STAT1 SIX2 WNT4 SMO FZD7 BASP1 SALL1 LIF GREM1 TCF15 GDNF	20	mesenchymal to epithelial transition	Kidney Development and Differentiation	The interacting proteins in this system primarily contribute to kidney development and differentiation. Key proteins involved in this process include BMP4, PAX8, WT1, WNT9B, CTNNB1, GATA3, PAX2, SIX2, WNT4, SMO, FZD7, SALL1, LIF, GREM1, TCF15, and GDNF. 1. BMP4, WNT9B, WNT4, and GREM1 are involved in nephron formation and branching morphogenesis. BMP4 and GREM1 are antagonistic, with BMP4 promoti…	0.8	16	0.416635	1838	0.849517	purine nucleobase transport	0.372325	2897	0.762813	kidney development|kidney epithelium development|nephron development|cell differentiation involved in kidney development|renal system development|kidney morphogenesis|nephron epithelium development|epithelial cell differentiation involved in kidney development|nephric duct development|kidney mesenchyme development|nephron tubule development|kidney rudiment formation|nephron morphogenesis|renal tu…	0.9510182|0.90121865|0.8949318|0.89226836|0.89008594|0.8721574|0.85565454|0.8552669|0.8398361|0.8388711|0.8335649|0.8306048|0.8234262|0.81769264|0.81753945|0.8147913|0.8087758|0.80802625|0.80784196|0.80579793|0.80113935|0.79990697|0.7949695|0.79451215|0.7931911|0.7914975|0.7887557|0.7827038|0.78202546|0.7817977|0.77979946|0.7778503|0.77738976|0.77619874|0.7736687|0.7728509|0.77274966|0.769036|0.7…	1.5614116035254975e-27|2.7797110866939566e-33|5.730120717622731e-33|1.4508216733169138e-37|2.5729684783997477e-27|1.594659621392508e-36|4.300071328789936e-35|6.797344768264208e-36|2.4282026015277128e-09|4.49034822239624e-17|1.191582331320015e-33|1.357436832485438e-09|4.867716853118363e-35|2.0327896578683397e-33|1.1351678234798035e-07|1.0|6.623944180904662e-10|0.0023317488953917016|6.2571178418974…	5.959586272998082e-27|1.5189678069365884e-32|4.2133240570755376e-32|1.179529815704808e-36|1.9059025765924057e-26|1.3288830178270902e-35|4.215756204696016e-34|7.996876197957892e-35|1.079201156234539e-08|3.0340190691866484e-16|1.4185503944285892e-32|6.75341707704198e-09|6.953881218740518e-34|3.034014414728865e-32|5.619642690494076e-07|1.0|3.806864471784289e-09|0.006477080264976949|1.009212555144749…	1	1
GO:0036297	RNF168 RAD51D CENPS CENPS-CORT FANCL MCM8 FANCD2 EXO5 XRCC3 HROB RNF8 ATR VCP POLN RFWD3 ERCC6L2 DCLRE1C SLX4 FANCF XPA ERCC4 FAAP24 CENPX FANCC RAD51 FAAP20 RAD51AP2 NEIL3 MCM9 DCLRE1A FANCI FANCM FANCA FAN1 ERCC1 FAAP100 FANCE RAD51AP1 NUCKS1 FANCG FANCB DCLRE1B	42	interstrand cross-link repair	DNA Repair and Replication	The primary biological process performed by this system of interacting proteins is DNA repair and replication. The proteins involved in this system work together to maintain genomic stability and ensure accurate DNA replication. 1. Homologous Recombination (HR) and Fanconi Anemia (FA) Pathways: RAD51, RAD51D, XRCC3, FANCA, FANCB, FANCC, FANCD2, FANCE, FANCF, FANCG, FANCI, FANCL, FANCM, and FAAP20…	1	42	0.554903	173	0.985836	endocrine pancreas development	0.392842	1872	0.846733	DNA replication|DNA repair|DNA synthesis involved in DNA repair|DNA-templated DNA replication|nuclear DNA replication|cell cycle DNA replication|DNA replication proofreading|mitotic DNA replication|DNA biosynthetic process|DNA replication initiation|regulation of DNA replication|DNA metabolic process|DNA strand elongation involved in DNA replication|regulation of DNA-templated DNA replication|DNA…	0.89234465|0.8827354|0.8613342|0.8354455|0.82740843|0.82221156|0.8043305|0.77952456|0.77318543|0.7730781|0.77153|0.75015867|0.74539834|0.7399651|0.739815|0.7384962|0.73804426|0.72968614|0.7264404|0.7158782|0.7082646|0.70037025|0.6923719|0.68775165|0.687636|0.6868004|0.6866832|0.686618|0.6849668|0.68462104|0.6841359|0.68220216|0.6818644|0.681449|0.6813972|0.679509|0.676221|0.6730875|0.671464|0.671…	2.4041526739098567e-12|3.9027836891636756e-63|2.666355617322352e-06|1.55022487764978e-13|0.09131934650955144|0.10242131566314065|1.0|0.03376753788758064|7.699818231242505e-06|1.0|0.04432936120717226|2.814082899369089e-52|1.0|1.0|0.05256078451947935|5.13322437762869e-31|1.0|1.0|1.0|1.0|5.6451196612781827e-08|1.0|1.0|1.0|1.1729484331209245e-05|1.0|1.0|1.0|1.0|1.0|0.0036953521185568144|1.0|1.0|0.038…	5.807132062584195e-12|3.516021341588897e-62|6.424953294752656e-06|6.276214079553765e-13|0.13331291461248385|0.1612934104931349|1.0|0.05733028503833725|2.3500668725623598e-05|1.0|0.07718907263314667|5.517809606606057e-51|1.0|1.0|0.10491174554786296|8.8503868579805e-30|1.0|1.0|1.0|1.0|2.679963301186703e-07|1.0|1.0|1.0|4.826948284448249e-05|1.0|1.0|1.0|1.0|1.0|0.0107423026702233|1.0|1.0|0.0907296628…	1	1
GO:0014037	DICER1 NAB2 POU3F2 NDRG1 NF1 MYOC PPP3R1 SOD1 DAG1 ADGRG6 SLC25A46 CDK1 PRX NAB1 FA2H PARD3 SH3TC2 PALS1 NTRK2 ARHGEF10 GPC1 ILK CDK5 EGR2 NCMAP ITGB4 AKT1 ERBB3 MED12 SIRT2 PLEC LAMB2 CNTNAP1 LGI4 AKT2 SKI POU3F1	37	Schwann cell differentiation	Neuronal Development and Maintenance	The primary biological process performed by this system of interacting proteins is neuronal development and maintenance. The proteins involved in this process are crucial for the proper functioning of the nervous system, including the formation of neurons, synapses, and myelin sheaths. 1. Neuronal differentiation and development: POU3F1 and POU3F2 are transcription factors that play a role in neu…	0.891892	33	0.712855	53	0.995661	peripheral nervous system development	0.755858	32	0.99738	neuron development|neuron maturation|central nervous system neuron development|neuron differentiation|central nervous system neuron differentiation|cell morphogenesis involved in neuron differentiation|nervous system development|peripheral nervous system neuron development|nerve development|neurogenesis|generation of neurons|forebrain neuron development|central nervous system development|neuron f…	0.9207072|0.8937985|0.8915473|0.87161326|0.8606485|0.8458937|0.8457933|0.8228669|0.81919765|0.81609356|0.81041515|0.8005005|0.7973957|0.7953983|0.795136|0.788483|0.78627956|0.78593314|0.7850338|0.7849747|0.7817752|0.77896374|0.7737602|0.772205|0.7692604|0.7686551|0.76643074|0.7663361|0.76326406|0.76026094|0.7592884|0.75585777|0.75184786|0.7515216|0.7499542|0.7498198|0.74891424|0.7464182|0.7458393…	3.3282726223940996e-09|0.004418140697786635|0.0008370252809026291|5.899011305432943e-08|0.000532484473369696|2.2498772786738502e-07|8.617754493673932e-32|0.0004674766970848026|3.147162510369835e-08|2.1002066620876934e-38|1.4226900380450422e-08|1.0|2.0403102779617562e-09|1.0|0.1312403288852943|4.2206440441289015e-06|0.05521012360245249|0.06887313293964503|1.0|0.0064606050838686355|1.0|7.4595560216…	6.751060085992088e-09|0.006487724960039111|0.0015704039041325123|1.6206075014925669e-07|0.0010735574059872904|7.352540126385131e-07|7.763742787093632e-31|0.001050509431651242|1.2741548624979089e-07|2.692572643702171e-37|5.977689235483371e-08|1.0|9.068045679830028e-09|1.0|0.24439539829663742|1.674858747670199e-05|0.11176138381063257|0.13557703334575794|1.0|0.014783993326930516|1.0|3.43758342013677…	1.43799e-91	1.43799e-88
GO:0042269	SERPINB9 RASGRP1 LILRB1 GFER IL12B ARRB2 KLRC4 CRK HAVCR2 IL12A AP1G1 PIK3R6 LAMP1 CLEC12B HLA-E LEP STAT5B MICA VAV1 HLA-A NCR1 KIR2DL4 CEACAM1 KLRC3 HLA-G KLRK1 KLRC2 IL21 HLA-B CD226 KLRC4-KLRK1 NECTIN2 KLRC1 CRTAM NCR3 CADM1 LGALS9 SERPINB4 KLRB1 KLRD1 LAG3 PVR CD160 RAET1E HLA-F SLAMF6 SH2D1A	47	regulation of natural killer cell mediated cytotoxicity	Natural Killer Cell Activation and Inhibition	The primary biological process performed by this system of interacting proteins is the regulation of natural killer (NK) cell activation and inhibition. NK cells are essential components of the innate immune system, responsible for detecting and eliminating infected or transformed cells. 1. NK cell activation: Several proteins in the system contribute to NK cell activation, including IL12A, IL12B…	0.957447	45	0.699034	21	0.998281	vagina development	0.243795	8852	0.275258	natural killer cell activation|natural killer cell mediated immunity|natural killer cell inhibitory signaling pathway|natural killer cell activation involved in immune response|regulation of natural killer cell activation|natural killer cell tolerance induction|protection from natural killer cell mediated cytotoxicity|natural killer cell mediated cytotoxicity|regulation of natural killer cell med…	0.84621596|0.83330834|0.8246325|0.8099982|0.77142996|0.7710499|0.76544654|0.764837|0.75505316|0.7370359|0.73609495|0.73577225|0.72820467|0.72465295|0.7190079|0.71066153|0.7104986|0.70978546|0.7032484|0.7021826|0.6990336|0.6941019|0.69010055|0.6892377|0.67985255|0.67956924|0.67919374|0.67833525|0.6678705|0.66308844|0.6556119|0.65137213|0.6437304|0.6423832|0.6391249|0.6291512|0.6288478|0.62732315|0…	3.5575406827946137e-31|1.4518913689223733e-118|2.2027571624228435e-05|3.795926295285067e-08|2.862352182634888e-29|1.930775284100996e-08|3.046447441848255e-16|8.578594699078667e-120|6.813637977656726e-135|0.002119657661937797|0.0005627824975217171|1.527759525688801e-20|2.414067132183979e-08|1.0|3.863261452534229e-23|0.00032639004346645865|1.700951461525876e-21|3.317307439100462e-76|0.0003982240400…	1.488510745939169e-30|2.4608328286819888e-117|4.8950159164952076e-05|1.0603146076215271e-07|2.236212642683506e-28|6.774650119652618e-08|1.813361572528723e-15|4.765885943932593e-118|4.008022339798074e-133|0.005022885454828903|0.0014140263756827064|1.3284865440772182e-19|9.773551142445259e-08|1.0|3.982743765499205e-22|0.0009860726388714763|1.8691774302482154e-20|9.756786585589594e-75|0.001241759001…	1	1
GO:0043162	NEDD4 CHMP6 VPS37B STAM CHMP2A RNF126 SNF8 VPS25 CHMP2B CHMP5 CHMP4B PTPN23 MVB12A VPS36 TSG101 UBAP1L VPS37D VPS37A VPS28 CHMP1A CHMP7 RNF103-CHMP3 CHMP1B VPS4A TOM1L1 UBAP1 CHMP4A MVB12B HGS PLAA STAM2 CHMP3 HDAC6 CHMP4C RNF115 VPS4B VPS37C	37	ubiquitin-dependent protein catabolic process via the multivesicular body sorting pathway	Endosomal Sorting Complex Required for Transport (ESCRT)	The primary biological process performed by this system of interacting proteins is the Endosomal Sorting Complex Required for Transport (ESCRT). The ESCRT machinery is responsible for the sorting and degradation of membrane proteins, as well as the formation of multivesicular bodies (MVBs) and the release of extracellular vesicles. 1. ESCRT-0 complex: The proteins HGS, STAM, and STAM2 form the ES…	1	37	0.576071	21	0.998281	regulation of epidermal cell division	0.309989	4206	0.655641	ESCRT III complex disassembly|ESCRT complex disassembly|viral budding via host ESCRT complex|regulation of viral budding via host ESCRT complex|endosome transport via multivesicular body sorting pathway|synaptic vesicle endosomal processing|multivesicular body sorting pathway|endosome to lysosome transport via multivesicular body sorting pathway|endosomal transport|endosome membrane tubulation|en…	0.7812735|0.77631164|0.71757984|0.650806|0.6445602|0.640633|0.6301955|0.61958396|0.6079823|0.6079534|0.6077896|0.6045994|0.60415596|0.5959984|0.58688986|0.58634615|0.58537924|0.5802913|0.5797565|0.5774516|0.5760709|0.5754853|0.56131625|0.56066847|0.5544684|0.5513767|0.54982936|0.5466057|0.5419756|0.5408557|0.53918874|0.538719|0.5382383|0.5378474|0.53595227|0.53495544|0.53476906|0.53403616|0.53387…	9.369414685847112e-21|9.369414685847112e-21|2.0760952327423027e-60|1.8350724822985583e-11|4.45365248822157e-75|1.0|1.5886678885097245e-71|3.080979700404972e-39|7.755247025299155e-50|1.0|1.3660038802841684e-57|4.531631399517681e-06|5.280896373286448e-55|0.025599701616920205|1.0|9.161230822614076e-11|1.0|1.0|2.566777916862721e-06|3.869383193914837e-77|3.1083647823834112e-114|9.25200367404555e-09|1.…	3.071939241261348e-20|3.6315560797857024e-20|2.414064224118957e-59|6.746590008450582e-11|6.851773058802416e-74|1.0|3.177335777019449e-70|3.899974304310091e-38|1.1931149269691008e-48|1.0|2.906391234647167e-56|1.6119963519500974e-05|1.1001867444346767e-53|0.055651525254174355|1.0|5.798247356084858e-10|1.0|1.0|1.0434056572612687e-05|1.2897943979716126e-75|1.1512462156975596e-112|5.111604239804171e-0…	1	1
GO:0002837	HRG AHR IL12B HAVCR2 IL12A MR1 HLA-DRB1 FBXO38 SLC22A13 CEACAM1 CD226 NECTIN2 CRTAM CD274 HMGB1 PVR HLA-DRB3 IL4I1 CD160 HSPD1	20	regulation of immune response to tumor cell	Modulation of Immune Response	The system of interacting proteins primarily modulates immune response through the regulation of cytokine production, cell adhesion, and antigen presentation. Key proteins involved in these processes include HRG, AHR, IL12A, IL12B, HAVCR2, HLA-DRB1, HLA-DRB3, and CD274. 1. Cytokine production and regulation: IL12A and IL12B form the heterodimeric cytokine IL-12, which plays a crucial role in the …	1	20	0.666342	34	0.997216	negative regulation of T-helper 17 type immune response	0.344699	2286	0.812838	regulation of immune response|regulation of immune system process|regulation of immunoglobulin mediated immune response|regulation of adaptive immune response|positive regulation of immune response|negative regulation of immune response|regulation of tolerance induction dependent upon immune response|immune response|regulation of leukocyte mediated immunity|activation of immune response|regulatio…	0.9107257|0.8198795|0.81175005|0.8104508|0.7978545|0.79333943|0.78906393|0.78020006|0.77826667|0.7627253|0.7605717|0.75983083|0.75944364|0.75348145|0.7462095|0.72186315|0.7123971|0.70807123|0.70196295|0.7012307|0.6971431|0.69099116|0.68519497|0.6846519|0.680279|0.67761487|0.6754482|0.67512345|0.67505145|0.67033046|0.6695121|0.6688839|0.6665052|0.6663425|0.66605866|0.66025066|0.6598489|0.6582828|0…	4.212787320792251e-27|1.9265780100160685e-22|0.002419413880682517|8.487930915671362e-34|4.236245375008075e-24|1.0076828183178868e-09|3.875708396293315e-06|4.392269963232584e-21|4.1435959083553585e-32|1.0406915388781145e-09|1.3663822183305136e-34|0.00349568548890107|0.001134394744063187|1.9337879425217725e-05|1.6773972091553474e-28|1.1245780797052037e-28|5.266984907873353e-14|5.274544849637745e-07…	1.5957527730273678e-26|7.92830456796736e-22|0.004222362793512247|6.529177627439509e-33|2.881799574835425e-23|3.920944818357536e-09|1.0856326040037298e-05|3.2778134053974506e-20|4.6039954537281765e-31|4.505158176961534e-09|1.6663197784518458e-33|0.0085678565904438|0.0028574174913430406|6.931139578931083e-05|1.950461871110869e-27|1.874296799508673e-27|4.082934037111126e-13|2.375412546866735e-06|1.0…	1	1
GO:0048679	RTN4RL1 PTEN FLNA PTPRF PTN RTN4R PTPRS KLK8 SPP1 IGF1R STK24 SCARF1 CNTF CERS2 RGMA MAP2K2 LRIG2 INPP5F KLF4 KREMEN1 EPHA4 GRN MAP2K1 KIAA0319 FKBP1B BRAF TNR NDEL1	28	regulation of axon regeneration	Neuronal Growth and Differentiation	The interacting proteins in this system primarily contribute to neuronal growth, differentiation, and synaptic plasticity. Key proteins involved in these processes include RTN4RL1, PTEN, FLNA, PTPRF, PTN, RTN4R, PTPRS, KLK8, SPP1, IGF1R, STK24, SCARF1, CNTF, CERS2, RGMA, MAP2K2, LRIG2, INPP5F, KLF4, KREMEN1, EPHA4, GRN, MAP2K1, KIAA0319, FKBP1B, BRAF, TNR, and NDEL1. 1. RTN4RL1 and RTN4R are both…	1	28	0.568599	448	0.963321	phosphate ion homeostasis	0.259776	8332	0.317832	neuron differentiation|neuron development|neuron maturation|central nervous system neuron differentiation|central nervous system neuron development|cell morphogenesis involved in neuron differentiation|nerve development|neurogenesis|neuroblast differentiation|nervous system development|glial cell development|glial cell differentiation|nerve maturation|forebrain neuron differentiation|axon develop…	0.9136793|0.9115381|0.89039814|0.8739309|0.86183614|0.8615895|0.8414768|0.8400754|0.83424014|0.8317554|0.81459486|0.8137071|0.808058|0.807648|0.8067439|0.7959442|0.79292524|0.7877213|0.7869095|0.78499407|0.7843946|0.784256|0.7821234|0.7802956|0.7786106|0.77507555|0.774335|0.7736691|0.77257764|0.76414186|0.7632881|0.7620324|0.7615513|0.7583953|0.75814366|0.75638825|0.7468059|0.74644136|0.745479|0.…	1.6403593843491241e-31|3.942787255054149e-34|0.07252021286730254|0.0028384861616424987|0.00036458492201929066|1.1735048983290301e-12|0.13428482936682845|3.2908845845086334e-29|1.0|3.2401509310031783e-24|0.0007892433419765753|1.4141041789576957e-06|1.0|1.0|3.080999502712499e-44|1.0|1.0|1.0|1.0|4.380902881923782e-07|0.00020572389288764056|1.0|1.0|1.0|0.0028845656219464444|1.0|1.0|0.2742422318071608…	6.892266320794639e-31|2.202674444164329e-33|0.10156892558445733|0.005023869312641591|0.000748634336795258|5.334113174222864e-12|0.20659204517973606|3.226357435792778e-28|1.0|2.892991902681409e-23|0.0019391728304092761|5.316181123901111e-06|1.0|1.0|5.312068108124998e-43|1.0|1.0|1.0|1.0|1.759398747760555e-06|0.0006428871652738767|1.0|1.0|1.0|0.008714699764188653|1.0|1.0|0.5294251579288818|1.1934329…	1	1
GO:0051767	JAK3 LRRK2 MAP2K3 FCER2 EDN1 NOD2 NAMPT STAT1 KDR CCL2 MAP2K6 TLR9 TLR4 IL33 AKAP12 MAP2K4 IFNG GSTP1 SELENOS JAK2 TLR2	21	nitric-oxide synthase biosynthetic process	Inflammatory Signaling Cascade	The prominent biological process performed by this system of interacting proteins is the inflammatory signaling cascade. This process is crucial for the immune response and cellular communication during inflammation. 1. Activation of JAK-STAT pathway: JAK3 and JAK2 are members of the Janus kinase family, which phosphorylate and activate STAT1. This pathway is essential for cytokine signaling, suc…	1	21	0.335489	4653	0.619044	regulation of immune complex clearance by monocytes and macrophages	0.436622	881	0.92787	inflammatory response|innate immune response-activating signaling pathway|immune response-activating signaling pathway|immune response-regulating signaling pathway|acute inflammatory response|production of molecular mediator involved in inflammatory response|signaling|lipopolysaccharide-mediated signaling pathway|intracellular receptor signaling pathway|regulation of inflammatory response|neuroin…	0.74414194|0.7424736|0.7372085|0.7249837|0.7137786|0.6933547|0.6912799|0.6897529|0.681068|0.67862844|0.67574227|0.67308295|0.67298543|0.6715425|0.66880584|0.66863453|0.66200995|0.6604768|0.6594674|0.65722823|0.65682584|0.65455526|0.6538298|0.6534942|0.65300536|0.6518461|0.6517174|0.65114176|0.650157|0.6490345|0.6436575|0.63880503|0.6378006|0.6354834|0.63469267|0.63294125|0.63281405|0.63226116|0.6…	1.874416264256644e-11|4.150385754085135e-06|9.610107172004091e-05|8.624581721148307e-06|0.00833165719071294|0.004473400612212667|2.4833358050781322e-08|5.9986218002402085e-05|2.5648576582282738e-05|6.167318574948325e-12|1.6084211075380998e-10|0.0001179586171710518|0.009758854724680117|0.00026634160695285464|0.0021145032683027812|3.5798698390747348e-06|0.0035634657718895267|7.213622417844529e-05|2…	4.33892653763112e-11|7.996889699586002e-06|0.00020021056608341857|1.9645972029950585e-05|0.014389736080678653|0.008840712672357049|8.533800017450626e-08|0.00015109878590025713|7.477719120199048e-05|3.099155062788103e-11|7.962480730386632e-10|0.000362949591295544|0.020729679486560012|0.0008375522231221843|0.005714873698115625|1.4434959028527156e-05|0.009579209064219158|0.0002513457288447571|1.7073…	1	1
GO:0043001	RAB34 NSF SPTBN1 LYPLA1 BBS1 RSC1A1 ATP2C1 MACF1 BLZF1 PHAF1 KRT18 VAMP2 CNST GOLPH3L BBS2 RAB26 GGA2 GGA3 GOLGA4 PKDCC OPTN GOLPH3 CLN3 GOLGA7 AMN KIF13A RAB10 SYS1 GCC2 ANK3 RAB31 VAMP5 VAMP3 GGA1 RACK1 PREPL ACSL3 ARFRP1 CSK	39	Golgi to plasma membrane protein transport	Vesicle Trafficking and Golgi Apparatus Regulation	1. RAB GTPases involvement: RAB34, RAB26, RAB10, and RAB31 are members of the RAB family of small GTPases, which regulate vesicle trafficking, including vesicle formation, movement, and fusion. Their presence suggests a role in vesicle transport and membrane trafficking. 2. SNARE proteins: VAMP2, VAMP3, and VAMP5 are members of the SNARE protein family, which mediate membrane fusion events during…	0.615385	24	0.542153	111	0.990912	import into nucleus	0.262801	7189	0.411413	regulation of ER to Golgi vesicle-mediated transport|regulation of retrograde vesicle-mediated transport, Golgi to ER|vesicle tethering to Golgi|Golgi vesicle transport|vesicle targeting, to, from or within Golgi|vesicle cytoskeletal trafficking|vesicle targeting, trans-Golgi to endosome|regulation of retrograde transport, endosome to Golgi|regulation of vesicle-mediated transport|regulation of G…	0.79079926|0.78708744|0.76039433|0.740835|0.7339102|0.7203668|0.7185626|0.71758854|0.7016899|0.68414766|0.6757173|0.66822755|0.66789323|0.6669352|0.66423684|0.6616462|0.6611997|0.65818685|0.65519017|0.6551749|0.64839774|0.64731365|0.6464998|0.6456256|0.6423427|0.6392039|0.6380911|0.6372533|0.6365495|0.6353725|0.63407165|0.63388467|0.63271916|0.6323532|0.63023823|0.6288597|0.62818974|0.6236456|0.6…	1.0|1.0|1.0|3.11659207642712e-70|1.0|0.011045598843920498|1.0|1.0|2.616939551980451e-13|1.0|0.07457586996678993|1.0|1.0|0.006457509547077681|1.0|1.0|0.044548638272088895|0.09752174243279418|9.635794290547704e-91|1.0|1.0|0.00022429040363994082|1.0|1.0|1.0|1.0|1.0|1.0|6.3768788038692635e-06|0.01259485159672694|1.0|1.0|1.0|0.2638712647945415|6.020043813223184e-25|1.0|1.0|1.0|2.4652416797858377e-05|1…	1.0|1.0|1.0|4.269304214283726e-69|1.0|0.020226528413770102|1.0|1.0|1.5214764837095647e-12|1.0|0.12512729860199653|1.0|1.0|0.01626576712110247|1.0|1.0|0.0930034201922524|0.18863006273267732|4.189475778499002e-89|1.0|1.0|0.0007577378501349352|1.0|1.0|1.0|1.0|1.0|1.0|2.9522587054950295e-05|0.03682705145241795|1.0|1.0|1.0|0.5214847130326906|1.0121434753896991e-23|1.0|1.0|1.0|0.00012264883979034018|1.…	1	1
GO:0051150	BMP4 SIRT1 EREG MECP2 SOD2 ZEB1 PRDM6 KIT NFATC3 MYOCD FOXO4 GPER1 RBPMS2 ANKRD17 EFEMP2 OLFM2 HEY2 CTH PDGFB NFATC1 PDCD4 SHH FGF9 MED28 DNMT1 ENG SRF NFATC2 FGFR2	29	regulation of smooth muscle cell differentiation	Regulation of Cellular Differentiation and Proliferation	1. BMP4, a member of the bone morphogenetic protein family, plays a crucial role in embryonic development, cell differentiation, and bone formation. It interacts with SIRT1, a NAD-dependent protein deacetylase, which regulates cellular processes such as aging, inflammation, and stress resistance. 2. EREG, an epidermal growth factor family member, is involved in cell proliferation, differentiation…	1	29	0.588057	102	0.991649	meiotic telomere clustering	0.197941	10151	0.168905	regulation of cell differentiation|regulation of cellular process|regulation of timing of cell differentiation|regulation of cell development|regulation of cell population proliferation|regulation of cell division|regulation of cell morphogenesis involved in differentiation|regulation of cell growth|regulation of stem cell differentiation|regulation of cell maturation|regulation of extent of cell…	0.856842|0.7930234|0.78744483|0.7618723|0.75575906|0.75213|0.75184214|0.7354284|0.71561146|0.7148472|0.6987847|0.69232756|0.6872978|0.68716145|0.6870142|0.6828662|0.68037117|0.67696446|0.6750581|0.6737017|0.6683993|0.6666883|0.6650953|0.6640885|0.66169715|0.66083395|0.6602907|0.65333927|0.65204465|0.65197986|0.65017927|0.6496829|0.64841783|0.6477736|0.6431082|0.6429889|0.6409667|0.6406648|0.63900…	7.965514737971378e-31|1.5390593047719513e-06|0.018454784382137657|6.596748116668461e-05|3.4090946941569086e-17|1.4414308816475262e-05|1.0|0.033699785612509116|1.0|1.0|0.16898618734888485|1.3355967061062548e-12|7.26454508544681e-06|1.0|1.56367307333704e-05|3.138965027639162e-18|1.0|1.0|0.0021079445468693333|4.3509422683349084e-09|0.0076613054512138625|2.955121930245249e-11|1.1274847830753594e-07|0…	3.277989604103448e-30|3.0719746602234557e-06|0.028132293265453745|0.00014065561016350664|1.7848663320193238e-16|3.9063167524323205e-05|1.0|0.057312560565491694|1.0|1.0|0.27299868715490283|7.902939089386123e-12|2.4296137409521105e-05|1.0|5.968217837164275e-05|3.3041737133043815e-17|1.0|1.0|0.00559136484580725|2.2661157647577646e-08|0.018209579386322727|2.0810717818628514e-10|5.394664033853395e-07|…	1	1
GO:0008210	SULT1E1 CYP3A5 UGT2B28 UGT2B7 PLEKHA1 HSD3B1 TIPARP HSD17B12 UGT1A1 CYP19A1 HSD17B7 RDH8 HSD17B11 CYP2C9 CYP1A2 CYP1A1 CYP2D6 HSD17B2 UGT2B10 UGT2B11 CYP1B1 UGT2B4 CYP2C8 UGT2B17 UGT1A3 PDGFRA UGT2B15 CYP3A7-CYP3A51P DHRS11 CYP3A7 CHST10 HSD17B4 CYP3A4 SGPL1 HSD17B10 HSD17B1 AKR1B15 SULT1A1 HSD17B8 UGT1A7	40	estrogen metabolic process	Steroid Hormone Metabolism	The primary biological process performed by this system of interacting proteins is steroid hormone metabolism. This process involves the synthesis, conversion, and degradation of steroid hormones, which are essential for various physiological functions. 1. Key enzymes in steroid hormone synthesis and conversion: - HSD3B1, HSD17B1, HSD17B2, HSD17B4, HSD17B7, HSD17B8, HSD17B10, HSD17B11, and HSD17B…	0.975	39	0.771549	6	0.999509	mitochondrial transmembrane transport	0.333778	2015	0.835025	steroid metabolic process|C21-steroid hormone metabolic process|androgen metabolic process|regulation of steroid metabolic process|hormone metabolic process|estrogen metabolic process|thyroid hormone metabolic process|response to steroid hormone|cholesterol metabolic process|glucocorticoid metabolic process|mineralocorticoid metabolic process|steroid hormone mediated signaling pathway|cortisol me…	0.9591538|0.830028|0.8266163|0.812984|0.81239665|0.7715494|0.7449448|0.7338605|0.7295291|0.7199795|0.7186122|0.715751|0.7106311|0.70980227|0.7039265|0.7014261|0.69690067|0.6968337|0.69674885|0.6941737|0.69081044|0.68555224|0.6828486|0.6827652|0.66977406|0.66736645|0.6652345|0.6570685|0.6500549|0.6493695|0.6464846|0.6433356|0.6427952|0.64247155|0.63155645|0.6298634|0.6287393|0.628453|0.621879|0.61…	4.355519297955384e-71|0.0033567923829238315|1.5247033795559565e-30|0.19383238685092452|2.3267708139349238e-76|3.680599900879444e-122|1.0|0.04583068510476757|1.535690418801765e-05|1.0|1.0|1.0|1.0|1.7925739588347044e-20|0.08743154612002284|5.2240868866175596e-08|3.384848285225147e-09|0.06335702784639001|1.0|1.0|1.0|2.999748649615442e-27|1.0|3.193113963846883e-22|0.05233781998570266|1.0|0.0611632277…	3.512515562867245e-70|0.0049878044322790955|1.0515195721075562e-29|0.26846590976582346|3.6932870062459107e-75|8.977072928974254e-121|1.0|0.07550359984310967|4.570507198814777e-05|1.0|1.0|1.0|1.0|1.70721329412829e-19|0.168525962914453|2.61204344330878e-07|1.859806750123707e-08|0.12570838858410716|1.0|1.0|1.0|4.053714391372219e-26|1.0|4.041916409932763e-21|0.11365731929903067|1.0|0.1350258171482411…	1	1
GO:0033233	TOLLIP MAGEA2 HDAC4 SAE1 MUL1 ZMIZ1 FSCB GNL3 MAGEA2B RELA GNL3L CTNNB1 RASD2 HMG20B UBE2I RWDD3 CAPN3 UBA2 PARK7 ARNT PIAS4 PIAS3 EGR1 PIAS1 HMG20A	25	regulation of protein sumoylation	Regulation of Transcription and Protein Stability	The primary biological process performed by this system of interacting proteins is the regulation of transcription and protein stability. This is supported by the following observations: 1. Transcription regulation: Several proteins in the system are involved in the regulation of transcription. For example, RELA is a subunit of the NF-kB transcription factor complex, which plays a crucial role in…	1	25	0.534535	113	0.990748	Golgi to plasma membrane protein transport	0.281623	5093	0.583019	regulation of protein stability|regulation of mRNA stability|regulation of RNA stability|regulation of protein complex stability|regulation of DNA stability|regulation of gene expression|post-transcriptional regulation of gene expression|regulation of protein binding|protein stabilization|mRNA stabilization|regulation of transcription regulatory region DNA binding|biological regulation|regulation…	0.8506462|0.7561003|0.7483399|0.74177516|0.7217581|0.6959075|0.69567364|0.6828668|0.6773095|0.6710666|0.6691543|0.66626984|0.6661999|0.660077|0.6388553|0.6385561|0.6350471|0.6333232|0.6332832|0.6318406|0.6306398|0.6287324|0.62576425|0.6249565|0.6192575|0.6185945|0.6183418|0.6179083|0.6170542|0.6150653|0.610698|0.61032736|0.6094214|0.60896575|0.60336995|0.6033366|0.6002989|0.59939265|0.5976454|0.5…	0.00110513414264016|1.0|1.0|1.0|1.0|7.252248880972048e-07|1.0|0.0030612520475513283|0.036595756121142645|1.0|0.002588491557167137|0.00018945368363492476|0.001885379780767399|1.9252912957269328e-05|1.0|1.0|4.047797931552408e-05|0.0022098445064749365|1.0|1.0|0.010164286399022735|1.0|0.015216585363951844|1.0|1.0|4.771802277340142e-27|0.020311067706133862|2.119162567103276e-06|0.01311986547184585|1.0…	0.0015097460965029508|1.0|1.0|1.0|1.0|2.2452782913226154e-06|1.0|0.006110283528046563|0.06629665963975116|1.0|0.005777882940105217|0.0005723676242746971|0.004587298736660339|6.925508258010549e-05|1.0|1.0|0.00014303172903012043|0.0061727500180864155|1.0|1.0|0.02315327197955065|1.0|0.03563603129731111|1.0|1.0|6.040256047266003e-26|0.051290575015489545|1.0139533813891272e-05|0.03355464315050089|1.0|…	1	1
GO:0019433	APOC3 LPL PNPLA3 APOC2 LIPE PIK3CG PNPLA4 LIPC PLIN5 CPS1 FGF21 PNLIPRP2 SORL1 APOA5 PNPLA2 AADAC LIPI ABHD5 MGLL DAGLB LIPG GPIHBP1 PLB1 APOA1 APOB GPLD1 PNPLA5 PNPLA1 LIPH DDHD2 APOA4	31	triglyceride catabolic process	Lipid Metabolism and Regulation	The primary biological process performed by this system of interacting proteins is lipid metabolism and regulation. The proteins involved in this process are responsible for the breakdown, transport, and storage of lipids, as well as the regulation of lipid-related pathways. 1. Lipoprotein metabolism: APOA1, APOA4, APOA5, APOB, APOC2, APOC3, and GPIHBP1 are apolipoproteins and lipoprotein-binding…	1	31	0.466959	543	0.955543	aging	0.271496	6167	0.495088	lipid metabolic process|regulation of lipid metabolic process|lipid homeostasis|cellular lipid metabolic process|lipoprotein metabolic process|regulation of membrane lipid metabolic process|neutral lipid metabolic process|regulation of lipoprotein metabolic process|monoacylglycerol metabolic process|regulation of lipid biosynthetic process|regulation of triglyceride metabolic process|triglyceride…	0.899007|0.89333916|0.8643444|0.8318031|0.8048582|0.80117303|0.78381044|0.78180766|0.7722207|0.7680682|0.76756734|0.7598759|0.7583445|0.75808775|0.7537174|0.75190675|0.75008225|0.7491955|0.74682206|0.74604744|0.74003565|0.7371857|0.7370201|0.72519135|0.72048736|0.7154435|0.7084656|0.7046127|0.7008323|0.6988423|0.69763136|0.69467306|0.69374156|0.68989265|0.6844076|0.684268|0.68241096|0.6817863|0.6…	1.2567394222413716e-34|3.830767089549453e-18|2.9855185175113385e-25|3.123943587781709e-39|4.647331159864446e-09|1.0|5.146172982174945e-68|0.03206618417764496|0.02502752011224754|5.390759268414032e-10|4.21210474690627e-30|1.5913735889025458e-15|0.02102466669736804|0.022060744533388302|0.006324858782421476|2.756276118586401e-08|6.408928096674578e-72|1.0|1.456907796302216e-07|3.408582192090377e-27|1…	5.928016142647979e-34|1.3584280459395223e-17|1.725733247116381e-24|2.603286323151424e-38|1.5861198497830875e-08|1.0|9.896486504182587e-67|0.055002031179493927|0.04660618270437158|2.364368100181593e-09|4.6286865350618355e-29|1.1206856259877084e-14|0.04155072469835581|0.04848515282063363|0.015772715168133354|1.435560478430417e-07|1.9420994232347205e-70|1.0|6.937656172867695e-07|4.1067255326390084e-…	1	1
GO:0043278	PPP1R1B RGS4 SRR TACR1 GHR PITX3 DRD3 PRKCG OPRK1 SLC1A1 TACR3 PENK PPP1R9B GPI FADD DRD2 CNR1 MAP1LC3A PCSK1 FOSB CXCR4 ADCY8 OPRM1 PRKCE PPP5C PEA15 PPP2R2A AIF1	28	response to morphine	Dopaminergic Signaling Regulation	The primary biological process performed by this system of interacting proteins is the regulation of dopaminergic signaling. This is supported by the presence of several proteins involved in dopamine receptor signaling and modulation, such as DRD2, DRD3, PPP1R1B, and RGS4. DRD2 and DRD3 are dopamine receptors, which are involved in the transmission of dopaminergic signals in the central nervous s…	0.535714	15	0.33788	3343	0.726298	positive regulation of CD4-positive, CD25-positive, alpha-beta regulatory T cell differentiation	0.239734	8405	0.311855	regulation of synaptic transmission, dopaminergic|regulation of dopamine receptor signaling pathway|dopamine receptor signaling pathway|regulation of dopamine secretion|regulation of dopamine biosynthetic process|synaptic transmission, dopaminergic|positive regulation of dopamine receptor signaling pathway|regulation of dopaminergic neuron differentiation|negative regulation of dopamine receptor …	0.9040077|0.87610376|0.8536978|0.8353765|0.8188273|0.79538906|0.78707206|0.78589404|0.7754875|0.7750258|0.76937115|0.7653467|0.75310713|0.750642|0.7264699|0.7229197|0.7193874|0.7172984|0.68843794|0.6823375|0.67490125|0.6732314|0.6495846|0.6482793|0.64571166|0.64439833|0.6411787|0.63576293|0.63109124|0.6300169|0.629573|0.6289724|0.628808|0.6238767|0.6234254|0.62197995|0.6192992|0.61792296|0.617346…	1.0|6.38029295481386e-07|4.042335501207227e-07|4.042335501207227e-07|1.0|0.0008802514889281222|0.008139964871276576|1.0|7.70821934200454e-06|1.2074166099374221e-05|0.03217832203431698|1.2628199835841544e-05|7.158049458830082e-05|1.0|1.0|1.0|3.842432718158117e-05|0.016216018514958193|1.0|1.0|4.499271048368863e-07|0.06794947877884888|4.042335501207227e-07|1.0|1.0|1.4594908687128198e-06|0.0001680445…	1.0|1.3074370809044796e-06|1.0445311372628492e-06|1.0312080360222519e-06|1.0|0.0019648470735002727|0.014826894118900867|1.0|2.3500668725623598e-05|3.703731932323381e-05|0.057358862806269124|4.2662837283248463e-05|0.00021431285804880484|1.0|1.0|1.0|0.00013625647936730913|0.037537079895736555|1.0|1.0|1.898426602687284e-06|0.14039148508026628|1.8628274199111646e-06|1.0|1.0|6.2371404645846994e-06|0.0…	1	1
GO:0055010	FOXC2 MYBPC3 FOXC1 NKX2-5 HAND1 ZFPM2 DLL4 COL11A1 ISL1 RYR2 MED1 MYH6 TGFBR1 EDNRA TNNC1 BMP10 POU4F1 NOG FOXH1 TPM1 MYL3 SMAD4 CHD7 TNNI3 SMAD7 PKP2 HEY2 DSP TGFB1 NOTCH1 MYL2 FKBP1A BMPR1A TGFB2 LRP2 RBPJ HEG1 TNNT2 NRG1 PROX1 TGFBR3 TNNI1 ENG PTCD2 FGFR2 MYH7	46	ventricular cardiac muscle tissue morphogenesis	Cardiac Development and Function	The primary biological process performed by this system of interacting proteins is cardiac development and function. The proteins involved in this process are essential for the formation, maintenance, and regulation of the heart and its components. 1. Cardiac muscle development: Proteins such as MYH6, MYH7, MYL2, MYL3, TNNC1, TNNI1, TNNI3, TNNT2, and TPM1 are involved in the formation and functio…	0.869565	40	0.761504	26	0.997871	spleen development	0.522209	428	0.964958	heart development|cardiac cell development|cardiac muscle tissue development|cardiac ventricle development|adult heart development|cardiac jelly development|heart morphogenesis|cardiac muscle cell development|cardiac fibroblast cell development|heart formation|ventricular cardiac muscle tissue development|cardiac neural crest cell development involved in heart development|cardiac muscle tissue mo…	0.913507|0.8952584|0.87427175|0.862239|0.85380447|0.8375478|0.8345283|0.8327435|0.819187|0.8152777|0.81079257|0.81000257|0.8061788|0.78938115|0.7890934|0.78463644|0.7832079|0.77895004|0.77863395|0.77750325|0.7759112|0.7758073|0.7745603|0.7664827|0.76346636|0.7615037|0.7613537|0.7509511|0.7485496|0.7447784|0.7391465|0.73834765|0.7382444|0.73770845|0.73710454|0.73432803|0.73084694|0.7299314|0.72857…	5.701449551549916e-69|1.5094253366955823e-16|2.0340762567045505e-89|2.397569255563947e-103|1.4071899327000515e-10|1.0|8.045322175062294e-87|3.4567379993257e-13|0.010689809689143069|3.37922923731821e-10|6.307156954316571e-128|0.0008250892662506441|4.014756805556316e-125|1.0659742887854046e-16|0.010689809689143069|1.7539446624415523e-96|1.203247061137714e-28|9.884021147168733e-119|3.543317139224741…	4.4893303555511155e-68|5.134099784678852e-16|3.12934808723777e-88|4.2813736706499054e-102|5.25070870410467e-10|1.0|2.1171900460690246e-85|1.8289619044051324e-12|0.021379619378286138|1.5085844809456292e-09|3.153578477158285e-126|0.002285565834489319|2.007378402778158e-123|7.955032005861228e-16|0.025573707390294423|8.769723312207762e-95|1.648283645394129e-27|5.8141300865698426e-117|4.37446560398116…	0.0922776	0.964267
GO:2000010	SNX33 TNF ABCA12 HSP90AB1 TM9SF4 ERBB4 TMEM35A RIC3 AKT1 MAP1A TYROBP STX3 ABCA7 STX4 RANGRF GPD1L LRIG2 CD247	18	positive regulation of protein localization to cell surface	Regulation of Inflammatory Response and Cell Signaling	The system of interacting proteins primarily involves the regulation of inflammatory response and cell signaling. The proteins involved in this process are SNX33, TNF, ABCA12, HSP90AB1, TM9SF4, ERBB4, TMEM35A, RIC3, AKT1, MAP1A, TYROBP, STX3, ABCA7, STX4, RANGRF, GPD1L, LRIG2, and CD247. 1. Inflammatory response regulation: TNF, TYROBP, and CD247 are key proteins in this process. TNF is a pro-inf…	1	18	0.200938	9628	0.211724	negative regulation of chondrocyte development	0.164408	10961	0.102587	regulation of inflammatory response|regulation of acute inflammatory response|regulation of neuroinflammatory response|immune response-regulating signaling pathway|regulation of chronic inflammatory response|immune response-regulating cell surface receptor signaling pathway|regulation of signaling|inflammatory response|regulation of inflammatory response to antigenic stimulus|regulation of inflam…	0.8665894|0.7956644|0.762547|0.759157|0.75345016|0.7257541|0.725449|0.71983266|0.7166194|0.7122528|0.6878827|0.6867807|0.68004596|0.67924553|0.67723536|0.6771057|0.67657685|0.6757294|0.6744142|0.67041093|0.66765016|0.6667595|0.66178|0.6599439|0.65979695|0.65825176|0.6577737|0.65019524|0.6491919|0.6421815|0.641782|0.6413312|0.63963115|0.6372319|0.6325461|0.6324184|0.632256|0.6314907|0.6308344|0.63…	0.3277977465808178|0.04823406101154223|0.03511728380207089|0.00923660527945085|0.010451956811732856|0.03977138431550366|1.796940236420991e-05|0.048502012626482086|0.04421617512821749|1.0|0.055793880515399366|0.0572160574035441|1.0|0.00976644139678369|0.003146484119345115|1.0|1.0|0.006248801870250556|1.0|1.5050691828865962e-06|6.489637910026782e-05|0.0827164902931561|1.0|0.006914839369575618|0.141…	0.3729212134025231|0.061997507726918026|0.05096848157049476|0.015156950637741947|0.017749382848282636|0.06617534827870825|4.691749964545668e-05|0.07964205685793446|0.07938272015837969|1.0|0.09570133879142259|0.11196880118110392|1.0|0.02364755786146172|0.00825848850221815|1.0|1.0|0.015859903223986182|1.0|5.8110779262030735e-06|0.00021560258837298278|0.16812294775031728|1.0|0.018293225845438143|0.2…	1	1
GO:0002717	RASGRP1 IL12B KLRC4 IL12A SH2D1B AP1G1 LAMP1 HLA-E STAT5B VAV1 KIR2DL4 KLRC3 RAET1G HLA-G KLRK1 KLRC2 IL21 CD226 KLRC4-KLRK1 NECTIN2 CRTAM NCR3 CADM1 KLRD1 CLNK LAG3 PVR CD160 RAET1E HLA-F SLAMF6 SH2D1A	32	positive regulation of natural killer cell mediated immunity	Natural Killer Cell Activation	The primary biological process performed by this system of interacting proteins is the activation and regulation of natural killer (NK) cells, which play a crucial role in the innate immune response against viral infections and tumor cells. 1. NK cell receptors and ligands: Several proteins in the system, such as KIR2DL4, KLRC2, KLRC3, KLRC4, KLRK1, KLRD1, NCR3, and CD226, are known NK cell recep…	0.9375	30	0.770436	11	0.999099	interleukin-27-mediated signaling pathway	0.339458	1932	0.841821	natural killer cell activation|natural killer cell activation involved in immune response|NK T cell activation|natural killer cell degranulation|positive regulation of natural killer cell activation|natural killer cell mediated cytotoxicity|natural killer cell proliferation|natural killer cell mediated immunity|positive regulation of natural killer cell mediated cytotoxicity|natural killer cell m…	1.0000002|0.9332331|0.89031434|0.85434407|0.85081434|0.8442532|0.83199227|0.8139018|0.79370975|0.78382695|0.77043563|0.7669729|0.76284504|0.75406855|0.7524837|0.74801594|0.7469608|0.7362529|0.7313163|0.7276701|0.7265924|0.7240544|0.7206241|0.70684516|0.7065389|0.7024351|0.7009032|0.70046985|0.69760275|0.69723314|0.67580545|0.67111766|0.66494596|0.66285586|0.6616086|0.6586958|0.6545222|0.6522613|0…	5.357560443348339e-26|5.093645051340336e-09|0.0002598859689193893|4.8943493933322215e-09|1.5966636803254268e-19|9.930453048546298e-72|2.646626022564324e-06|6.817309437416947e-79|1.0670233868394411e-81|2.151254529888325e-15|8.716533482170488e-101|0.00015045971856566834|1.8017486094652122e-24|4.6624348903041786e-18|0.016676898401027842|0.0009856805460027802|0.0001205082658319145|9.99155219372489e-1…	1.9990897176672906e-25|1.2244339065721962e-08|0.0005115865529909237|1.4609998189051407e-08|9.337214504827056e-19|1.460360742433279e-70|7.518823927739556e-06|2.0050910110049842e-77|3.2334042025437608e-80|1.3529902703700156e-14|3.2283457341372177e-99|0.00046153287903579246|2.0019428994057914e-23|3.9180125128606544e-17|0.037623847377478606|0.0027228744364717686|0.00039903399282090895|6.8907256508447…	1	1
GO:0042402	ALDH7A1 SLC44A1 SMOX MAOA DHPS SLC6A3 LRTOMT DMGDH COMT MOXD1 DBH MAOB SAT1 CHDH HNMT PAOX	16	cellular biogenic amine catabolic process	Catabolism of Biogenic Amines	The primary biological process performed by this system of interacting proteins is the catabolism of biogenic amines, which are essential for neurotransmission and other cellular functions. The proteins involved in this process include MAOA, MAOB, COMT, DBH, HNMT, and SMOX. 1. Monoamine oxidases (MAOA and MAOB) are crucial for the breakdown of monoamines, such as dopamine, norepinephrine, and ser…	1	16	0.905025	2	0.999836	positive regulation of feeding behavior	0.239325	6201	0.492304	amine catabolic process|cellular biogenic amine catabolic process|biogenic amine metabolic process|biogenic amine biosynthetic process|amino-acid betaine catabolic process|amine metabolic process|neurotransmitter catabolic process|amine biosynthetic process|polyamine catabolic process|amide catabolic process|amino acid catabolic process|alkaloid catabolic process|alpha-amino acid catabolic proces…	0.9134626|0.90502506|0.78279364|0.76818967|0.75309956|0.7481327|0.72969127|0.7290449|0.7179094|0.7173659|0.6941525|0.6903588|0.6712533|0.6670527|0.64701253|0.63900095|0.6388351|0.63511395|0.6275856|0.6221205|0.61938345|0.61918104|0.6189391|0.61739534|0.61697906|0.61567533|0.6153898|0.6147553|0.6143367|0.6114388|0.6082268|0.60731614|0.5999109|0.5976279|0.5934309|0.5921876|0.5915994|0.5904103|0.590…	6.425534825915892e-54|3.779726368240596e-55|1.0816648067980904e-24|7.291293671550584e-13|0.002797201180038963|7.608505705187016e-36|1.630337978357165e-13|8.573696838389442e-13|5.056903501829598e-13|1.0|0.09789989108590484|1.0|1.0|1.0|1.0|1.0|1.0|5.394937577072119e-07|8.165101620752525e-07|5.056903501829598e-13|1.0|1.0|1.0|1.0|1.2221002735325708e-05|1.0|0.06856203352774799|0.027644011963096304|0.0…	4.283689883943928e-53|3.023781094592477e-54|6.145822765898241e-24|2.8933705045835654e-12|0.005151383388695654|6.086804564149613e-35|8.447347038120025e-13|4.244404375440318e-12|2.889659143902628e-12|1.0|0.1623547115852485|1.0|1.0|1.0|1.0|1.0|1.0|2.3977500342542754e-06|3.5655465592805784e-06|3.3269101985721042e-12|1.0|1.0|1.0|1.0|4.988164381765595e-05|1.0|0.1490478989733652|0.06581907610261024|0.01…	1	1
GO:0062009	FOXE1 TGFBR2 TBX1 WNT11 DLG1 ITGB6 COL11A2 WNT8A MMP25 SMAD2 SMAD4 CHD7 WNT3A ITGB8 JAG2 WNT5A TGFB2 FZD1 TSHZ1 TGFB3 FZD2 SOX11 LRRC32 TGFBR3 LEF1 WNT7A	26	secondary palate development	WNT/TGFŒ≤ Signaling Pathway Regulation	The primary biological process performed by this system of interacting proteins is the regulation of the WNT and TGFŒ≤ signaling pathways. These pathways play crucial roles in cell proliferation, differentiation, and migration, as well as embryonic development and tissue homeostasis. 1. WNT signaling pathway components: WNT11, WNT8A, WNT3A, WNT5A, WNT7A, FZD1, FZD2, and LEF1 are all involved in t…	1	26	0.236946	7358	0.397577	heart contraction	0.26592	5638	0.538399	regulation of Wnt signaling pathway|regulation of non-canonical Wnt signaling pathway|regulation of canonical Wnt signaling pathway|Wnt signaling pathway|regulation of Wnt protein secretion|Wnt signaling pathway, calcium modulating pathway|regulation of Wnt signaling pathway involved in heart development|regulation of BMP signaling pathway|regulation of transforming growth factor beta receptor si…	0.85945064|0.82630074|0.8007031|0.7597772|0.7312254|0.72451425|0.7172896|0.71409243|0.70890886|0.6904962|0.68888193|0.6858504|0.6826552|0.6818322|0.67423713|0.6733815|0.67257935|0.6722349|0.6716534|0.67115533|0.66323423|0.64760375|0.64710486|0.6461717|0.63930833|0.63901186|0.6354394|0.62661064|0.6264351|0.62609655|0.62505007|0.62441117|0.6235849|0.6147206|0.6130452|0.6113357|0.6054068|0.6051882|0…	0.00010461411948691087|0.04017766997762745|0.00047494075409058607|1.80652106517603e-07|1.0|2.2051961005937164e-05|6.157281665483235e-05|4.430850012680696e-07|1.9362767283414736e-06|7.470196799765825e-08|1.8704107493313524e-07|3.089680936695845e-08|0.0012073796291661074|0.008513069313348522|0.013568943756384837|0.0019675578399996146|0.009065753772779286|0.03871769334525005|0.0239999940814144|8.794…	0.00015637387068297587|0.05228950244313363|0.000916874042645919|4.741525105448897e-07|1.0|5.8338521179727945e-05|0.00014848138126957595|1.380327106754111e-06|6.266267729260432e-06|2.746395882266847e-07|7.084889202012699e-07|1.3980456727130523e-07|0.0030336171587088123|0.02076358369109396|0.03155568315438334|0.005191445488125632|0.022219984737204133|0.07933953554354518|0.053571415360299995|4.43944…	0.0520259	0.675661
GO:0033194	TP53INP1 DAPK1 XRCC1 GPX1 PRKD1 OXR1 TMIGD1 SP1 CD36 MGST1 RNF112 CD38 APOA4 GPX3 AIF1 JAK2 PRKCD TRPM2	18	response to hydroperoxide	Oxidative Stress Response and DNA Repair	The system of interacting proteins primarily involves the biological processes of oxidative stress response and DNA repair. 1. Oxidative stress response: Several proteins in the system are involved in the cellular response to oxidative stress, which is crucial for maintaining cellular homeostasis and preventing damage from reactive oxygen species (ROS). - GPX1 and GPX3: These proteins are glutath…	0.666667	12	0.568832	92	0.992468	courtship behavior	0.328415	4959	0.593991	response to oxidative stress|cellular response to oxidative stress|detection of oxidative stress|regulation of response to oxidative stress|regulation of cellular response to oxidative stress|regulation of oxidative stress-induced cell death|cellular oxidant detoxification|cell death in response to oxidative stress|positive regulation of response to oxidative stress|negative regulation of respons…	0.76643574|0.7611526|0.74450684|0.7391045|0.72391945|0.70882154|0.7071295|0.69324815|0.6881528|0.68662167|0.68447477|0.673975|0.6666867|0.6639837|0.6510986|0.64540666|0.6451397|0.6440115|0.6424517|0.6405773|0.6322512|0.6320176|0.6320046|0.6315555|0.6308592|0.6295417|0.62922466|0.629039|0.62806803|0.62620354|0.6253218|0.6246579|0.62253165|0.6206821|0.62053216|0.6203128|0.62024367|0.6189335|0.61847…	7.037814508191937e-30|1.4694723761377506e-22|1.0|2.2427571457848555e-06|1.4131232383974792e-06|5.310919817677962e-05|4.6254819791342627e-10|3.566417381160391e-10|1.0|0.02080067930104988|1.0|1.0|0.0020986964823247684|0.0004754332148692684|1.0|0.0005725182516231607|0.229888920962017|1.0|1.0|1.341256668492754e-05|3.122938414336993e-08|0.26999271799953567|0.030027057997827768|2.5648410928331336e-07|0…	2.826431529394352e-29|6.072199901395664e-22|1.0|5.470139379963062e-06|3.8192519956688626e-06|0.0001354826484101521|1.850192791653705e-09|1.4922248456738038e-09|1.0|0.040560033083220745|1.0|1.0|0.005057099957409081|0.001427727371979785|1.0|0.001631106129980515|0.43705118053615394|1.0|1.0|4.531272528691737e-05|1.523384592359509e-07|0.5252776614776958|0.06513461604734873|1.2098307041665725e-06|0.049…	1	1
GO:0070206	ITLN1 HLA-G SLC1A5 CLYBL COL1A2 PXDN STEAP4 MIF SIGMAR1 MLKL SCARA5 ASIC1 PNPT1 ALOX5AP P2RX3 SLC1A2 CD74	17	protein trimerization	Immune Response Modulation	The system of interacting proteins primarily performs the modulation of immune response. This is supported by the following observations: 1. ITLN1 (Intelectin-1) is an extracellular matrix protein that recognizes microbial glycans and plays a role in innate immunity by binding to bacterial cell walls. 2. HLA-G is a non-classical major histocompatibility complex (MHC) class I molecule that modulat…	1	17	0.315827	4636	0.620436	vascular endothelial cell proliferation	0.232152	9499	0.222286	regulation of immune response|regulation of tolerance induction dependent upon immune response|tolerance induction dependent upon immune response|regulation of immunoglobulin mediated immune response|immune response|negative regulation of immune response|regulation of immune system process|regulation of adaptive immune response|positive regulation of immune response|regulation of leukocyte mediat…	0.872251|0.7972151|0.79233|0.78658605|0.7834507|0.77815616|0.7752763|0.76348126|0.74297243|0.74296176|0.7361341|0.733603|0.7292589|0.7257316|0.7244969|0.7211652|0.70953774|0.7075633|0.6935581|0.6921491|0.68430114|0.6838688|0.6825073|0.68065315|0.6793735|0.6791642|0.6781025|0.676388|0.6705495|0.67041826|0.667006|0.6652695|0.6647023|0.6636661|0.65329444|0.6520777|0.651915|0.6483811|0.648039|0.64521…	0.19848191317783223|1.0|0.005935391854274402|1.0|0.07424005011767679|0.16766146203785925|0.1608390596382231|0.17679506654935292|0.135970614741536|0.21318665694971445|1.0|0.16179959971136296|1.0|0.13277081051025708|1.0|0.019655952483224503|0.030311142457931827|0.005661422682874806|1.0|1.0|0.0721170172970742|1.0|1.0|0.010856207544599605|0.022577058546869085|0.0838007425681648|0.0568197663305439|0.0…	0.22683647220323683|1.0|0.009698352703062749|1.0|0.10885637847166683|0.2595378669316707|0.245931283850494|0.2690944696337183|0.23006872206689677|0.36256234175121504|1.0|0.29418109038429624|1.0|0.2558204441430772|1.0|0.04218015554340022|0.06575085131872413|0.014516468417627708|1.0|1.0|0.13806646777316578|1.0|1.0|0.02762393777251808|0.05299779001612461|0.17242951145712923|0.12682983555924976|0.0050…	1	1
GO:0009084	OAT ASL CLN3 GLUD1 NOXRED1 GLS GLS2 GLUD2 PYCR1 GLUL PYCR3 SLC25A12 NAGS PYCR2 ALDH18A1 ASS1 LGSN OTC	18	glutamine family amino acid biosynthetic process	Urea Cycle and Glutamate Metabolism	1. Urea cycle proteins: OAT, ASL, NAGS, ASS1, and OTC are key enzymes in the urea cycle, which is responsible for the detoxification of ammonia and the production of urea. The urea cycle is essential for maintaining nitrogen homeostasis in the body. 2. Glutamate metabolism proteins: GLUD1, GLUD2, GLUL, GLS, and GLS2 are involved in glutamate metabolism. Glutamate is a critical neurotransmitter an…	1	18	0.512666	369	0.969789	regulation of myoblast fusion	0.344818	3764	0.691829	urea metabolic process|urea cycle|nitrogen cycle metabolic process|urea homeostasis|glutamate metabolic process|glutamine metabolic process|amide metabolic process|ammonia assimilation cycle|glutamine family amino acid metabolic process|dicarboxylic acid metabolic process|glutamate homeostasis|urea transmembrane transport|glucuronate metabolic process|glyoxylate cycle|cellular nitrogen compound m…	0.8531191|0.809441|0.7944683|0.79176307|0.7581913|0.7192316|0.70665467|0.6992917|0.69762564|0.68438905|0.68423116|0.68007135|0.6783968|0.67838097|0.67430246|0.672027|0.6716486|0.6716434|0.6687157|0.66750765|0.66746485|0.66561604|0.66155505|0.6596451|0.65819824|0.6576735|0.6574409|0.6570976|0.654589|0.6526694|0.6488272|0.6440458|0.6428715|0.6420139|0.6407156|0.6368842|0.6349944|0.6348202|0.6323187…	4.1866709934545557e-10|1.7784871565290994e-10|4.1866709934545557e-10|1.0|9.415733887594143e-24|9.221942388114714e-14|0.027545368446638015|3.121208091949817e-06|6.446062996356474e-44|2.562462926338768e-21|0.0052389430397894515|1.0|1.0|1.0|0.8266412892992447|1.0|5.4233469356231704e-08|9.403078603628309e-05|2.5522229331484843e-05|1.0|1.0|1.0|1.0|1.0|1.031017340643602e-23|1.0|0.4763725275284645|1.0|1…	8.965034247226029e-10|4.680229359287104e-10|1.3083346854545486e-09|1.0|6.319284488318217e-23|4.309318872950801e-13|0.04560491464675168|9.073279337063423e-06|8.594750661808632e-43|2.0499703410710143e-20|0.011006182856700528|1.0|1.0|1.0|1.0|1.0|2.671599475676438e-07|0.0003218898565564586|8.986700468832691e-05|1.0|1.0|1.0|1.0|1.0|1.0414316572157596e-22|1.0|0.9489492580248297|1.0|1.0|1.0|1.0|1.0|1.0|…	1	1
GO:0030889	PTEN CASP3 PKN1 LYN CD300A BTK INPP5D TYROBP ATM CTLA4 TNFRSF13B RC3H1 FCGR2B MNDA PAWR BLK IL10 TNFRSF21	18	negative regulation of B cell proliferation	Apoptosis Regulation and Immune Response	The primary biological process performed by this system of interacting proteins is the regulation of apoptosis and immune response. The proteins involved in this system have roles in cell signaling, cell death, and immune cell activation. 1. Apoptosis regulation: PTEN, CASP3, and PAWR are key proteins involved in the regulation of apoptosis. PTEN is a tumor suppressor that negatively regulates th…	0.944444	17	0.178194	10836	0.112821	lobar bronchus development	0.285958	7458	0.389389	immune response-regulating signaling pathway|regulation of adaptive immune response|regulation of immune response|apoptotic signaling pathway|regulation of apoptotic process|regulation of apoptotic signaling pathway|apoptotic process|regulation of lymphocyte apoptotic process|regulation of immune system process|immune response-regulating cell surface receptor signaling pathway|regulation of activ…	0.7266098|0.7240678|0.7198342|0.71793926|0.6995925|0.6923206|0.6777934|0.6725168|0.6716608|0.6702025|0.66178846|0.6592361|0.6583337|0.65814936|0.6566459|0.6527976|0.6466285|0.64537024|0.64366984|0.6402782|0.63674283|0.635147|0.63310933|0.63120747|0.629295|0.6288407|0.626575|0.62650806|0.6255908|0.62553144|0.6240107|0.62153155|0.62140894|0.617926|0.6177699|0.61766565|0.61690956|0.61608803|0.615282…	7.080374455607781e-16|1.3735549402097907e-06|9.223371661141485e-16|2.0898708003498015e-05|1.5666579224548809e-09|0.3205427471667029|7.895380413402307e-11|4.334439369069577e-09|2.893478494100436e-20|1.3132927252907823e-17|1.0|3.390518665561687e-13|0.009411422592004932|0.01149145869540232|1.0|9.662460776918599e-05|1.0|1.0|1.0|3.4134476277759255e-08|1.0|4.357641295983475e-11|3.2024097487291187e-16|3…	2.011470015797665e-15|2.7471098804195813e-06|3.719101476266728e-15|4.654500668930515e-05|5.497045341946951e-09|0.48714703216824146|3.3885752847220197e-10|1.6865522836846605e-08|2.2430065845739815e-19|9.057191208901948e-17|1.0|2.09291275651956e-12|0.020109877333601155|0.027174459862134685|1.0|0.0003235954981433313|1.0|1.0|1.0|1.5586518848291897e-07|1.0|3.007798175549008e-10|2.624926023548458e-15|0…	1	1
GO:0006895	KIF16B AP2A1 RAB14 SYS1 AP1AR SORT1 AP4M1 CORO7 GBF1 EPS15 DOP1B VPS13A DOP1A KLHL20 VPS13C MON2 WIPI1	17	Golgi to endosome transport	Intracellular Protein Trafficking	The primary biological process performed by this system of interacting proteins is intracellular protein trafficking, which involves the transport of proteins between different cellular compartments. 1. KIF16B: Kinesin family member 16B is a motor protein involved in the transport of early endosomes and recycling endosomes, contributing to the regulation of endosomal trafficking. 2. AP2A1: Adapto…	1	17	0.673809	23	0.998117	positive regulation of macrophage derived foam cell differentiation	0.173538	11013	0.0983298	intracellular protein transport|intracellular protein transmembrane transport|intracellular transport|protein transmembrane import into intracellular organelle|protein transmembrane transport|protein transport|regulation of intracellular protein transport|cytoskeleton-dependent intracellular transport|endosomal transport|intercellular transport|regulation of intracellular transport|transmembrane …	0.8777801|0.84304154|0.8324932|0.7670363|0.75559765|0.7510885|0.74981356|0.7408122|0.7405741|0.73091686|0.72433543|0.71551347|0.7031058|0.7004014|0.6869445|0.68530667|0.6849682|0.6796024|0.6777675|0.67721206|0.67659736|0.6760942|0.6738093|0.672778|0.67163104|0.6714561|0.6703788|0.6690155|0.66857296|0.66325885|0.6592554|0.6589402|0.6587827|0.65813464|0.6554185|0.653321|0.6477341|0.64381164|0.64377…	0.00012255659075934778|1.0|2.0239068654709104e-18|1.0|0.06349346325075807|2.3176613189056287e-14|1.0|1.0|8.497937965224783e-05|1.0|1.0|0.45526475350793416|1.0|6.398962657715102e-35|0.006989292638712222|1.0|1.0|1.0|1.0|1.0|1.0|0.03799180673187132|3.751260917747051e-58|1.0|0.00022835121142604156|1.0|1.0|0.07185165958741173|1.0|1.0|1.0|1.0|1.0|1.0|0.007906476498522799|1.0|1.0|0.00017225591150762124|…	0.0001818347043907237|1.0|8.995141624315157e-18|1.0|0.09434392756427647|1.1250783101483635e-13|1.0|1.0|0.00022782675509986015|1.0|1.0|0.801522453359039|1.0|9.84455793494631e-34|0.017343157912437276|1.0|1.0|1.0|1.0|1.0|1.0|0.08386712302841351|1.0717888336420144e-56|1.0|0.0007956488202997964|1.0|1.0|0.15320183280898025|1.0|1.0|1.0|1.0|1.0|1.0|0.0229839433096593|1.0|1.0|0.0007019738047457071|1.0|1.0…	1	1
GO:0031145	CDC20 ANAPC15 CDC16 UBE2C ANAPC16 CDK2 CDC27 ANAPC2 ANAPC4 ANAPC5 CDC23 CDC20B CDC26 ANAPC7 UBE2S ANAPC1 ANAPC13 CUL3 ECRG4 PLK1 FBXO31 ANAPC10 FZR1 ANAPC11	24	anaphase-promoting complex-dependent catabolic process	Anaphase-Promoting Complex/Cyclosome (APC/C) Regulation	1. Central role of APC/C in cell cycle regulation: - The majority of the listed proteins (CDC20, ANAPC15, CDC16, ANAPC16, CDC27, ANAPC2, ANAPC4, ANAPC5, CDC23, CDC20B, CDC26, ANAPC7, ANAPC1, ANAPC13, ANAPC10, FZR1, ANAPC11) are components or regulators of the Anaphase-Promoting Complex/Cyclosome (APC/C), a multi-subunit E3 ubiquitin ligase. - APC/C is crucial for cell cycle progression, specifica…	1	24	0.695753	4	0.999673	vesicle-mediated transport to the plasma membrane	0.157748	11111	0.0903062	regulation of anaphase-promoting complex-dependent catabolic process|regulation of metaphase/anaphase transition of cell cycle|regulation of mitotic metaphase/anaphase transition|anaphase-promoting complex-dependent catabolic process|regulation of metaphase/anaphase transition of meiotic cell cycle|regulation of asymmetric cell division|positive regulation of anaphase-promoting complex-dependent …	0.81212485|0.74665|0.7070947|0.6957533|0.66821223|0.6616396|0.6555479|0.63616186|0.6328806|0.6283372|0.6282339|0.6259253|0.61637855|0.60806346|0.60618687|0.6031178|0.60303533|0.59594065|0.59478563|0.5944648|0.59165096|0.5876812|0.5875793|0.5864441|0.58574635|0.58290863|0.5816735|0.5814924|0.5800354|0.5791089|0.57824624|0.5781487|0.5757321|0.5750718|0.5749976|0.57458603|0.56811774|0.56532645|0.565…	3.444902467804468e-15|4.051339798729657e-24|2.5833445413950176e-24|1.5149572820029744e-78|1.0|1.0|2.4100457446934485e-09|0.065114362599685|0.02900513881073359|1.3624916613142046e-22|0.02900513881073359|5.049501408222253e-30|1.0|2.562937396164249e-17|9.079310421019399e-21|0.000252147711966717|1.0|7.862738546533692e-29|0.000335927350025528|1.3296504639587592e-34|0.007433645428093502|0.0208807333579…	9.54266611580185e-15|1.761452086404199e-23|1.4432092410028032e-23|2.227878355886727e-77|1.0|1.0|9.031481270480865e-09|0.1038506580537241|0.053613934955145263|1.1449509758942897e-21|0.05245052226172439|6.157928546612504e-29|1.0|2.0340772985430548e-16|8.646962305732762e-20|0.0007782336789096204|1.0|1.077087472127903e-27|0.001063330132157582|1.8727471323362808e-33|0.017783840737065792|0.049716031804…	1	1
GO:0007063	ATRX SLF2 RB1 NAA10 CTNNB1 SLF1 MACROH2A1 CDCA5 DDX11 FEN1 NSMCE2 SMC5 CTCF AXIN2 BUB1 HDAC8 WAPL RAD21 TNKS ESPL1	20	regulation of sister chromatid cohesion	DNA Repair and Chromosome Segregation	The system of interacting proteins primarily involves processes related to DNA repair, chromosome segregation, and cell cycle regulation. 1. DNA Repair: ATRX, FEN1, and DDX11 are involved in DNA repair mechanisms. ATRX is a chromatin remodeler that plays a role in the maintenance of telomeres and genomic stability. FEN1 is a structure-specific nuclease that participates in DNA replication and rep…	1	20	0.464954	630	0.94842	IMP salvage	0.382418	2679	0.780662	chromosome segregation|nuclear chromosome segregation|DNA repair|meiotic chromosome segregation|homologous chromosome segregation|sister chromatid segregation|mitotic sister chromatid segregation|DNA synthesis involved in DNA repair|meiotic DNA repair synthesis|regulation of chromosome segregation|mitotic recombination|male meiosis chromosome segregation|DNA recombination|female meiosis chromosom…	0.8444278|0.80366135|0.7787862|0.7540685|0.7443456|0.7422132|0.7334738|0.72158504|0.72115743|0.7200186|0.71287435|0.70755947|0.700433|0.69934726|0.68896514|0.67464596|0.6745649|0.6741985|0.67244464|0.6699525|0.6696073|0.66452706|0.6607008|0.6574426|0.65547216|0.65386444|0.65371287|0.6534753|0.65325487|0.6525957|0.6452974|0.6438869|0.6422856|0.641361|0.64114964|0.64108014|0.6410587|0.640872|0.6407…	4.464276294043491e-34|1.1197905775272387e-35|2.4747329975815073e-10|0.00020421610252659362|0.07101907215696429|2.0170788156698152e-38|5.346078448524748e-21|1.0|1.0|6.5904748824685e-09|0.00038164893948218064|1.0|1.3724147140156443e-06|1.0|3.570027931463244e-30|1.0|1.0|0.1010207177303206|1.0|1.0|1.0|1.0|1.0|1.0|1.0|5.447456257646232e-15|1.0|1.0|3.222396290755465e-08|8.346703285805683e-05|1.0|1.0|1.…	2.047833162405271e-33|6.362446463222947e-35|7.856295230417484e-10|0.00041591874241668763|0.10428644956969792|1.7693673821665046e-37|3.8186274632319626e-20|1.0|1.0|2.6574495493824595e-08|0.0009990809934088498|1.0|4.936743575595843e-06|1.0|4.5190226980547397e-29|1.0|1.0|0.19389773076836966|1.0|1.0|1.0|1.0|1.0|1.0|1.0|4.5776943341564974e-14|1.0|1.0|1.873486215555503e-07|0.00036769617999143976|1.0|1.…	1	1
GO:0010882	ANK2 ATP2A2 HRC RYR2 DMD ATP1A2 SLC8A1 CALM1 CLIC2 TNNI3 GSTO1 CALM2 CALM3 CACNA1C TMEM38B CASQ2 CAMK2D FKBP1B PRKACA ATP1B1 SLC9A1 GSTM2 PLN TMEM38A	24	regulation of cardiac muscle contraction by calcium ion signaling	Calcium Homeostasis and Signaling	The primary biological process performed by this system of interacting proteins is calcium homeostasis and signaling. Calcium ions play a crucial role in various cellular processes, including muscle contraction, neurotransmitter release, and gene expression. The proteins in this system are involved in maintaining calcium ion concentrations and mediating calcium-dependent signaling pathways. 1. Ca…	0.958333	23	0.737805	11	0.999099	positive regulation of long-term neuronal synaptic plasticity	0.304623	7223	0.408629	calcium-mediated signaling|calcium ion homeostasis|regulation of calcium-mediated signaling|cellular calcium ion homeostasis|calcium-mediated signaling using intracellular calcium source|smooth endoplasmic reticulum calcium ion homeostasis|cellular response to calcium ion|response to calcium ion|endoplasmic reticulum calcium ion homeostasis|positive regulation of calcium-mediated signaling|regula…	0.9046788|0.85554683|0.840062|0.83839214|0.7919082|0.76647675|0.7603024|0.75641173|0.75149363|0.7426484|0.7378049|0.73780066|0.73129815|0.7207328|0.7007463|0.6997019|0.6978692|0.69580626|0.694492|0.69359803|0.67824113|0.6731634|0.6667587|0.6653374|0.6632842|0.6620977|0.66204214|0.661815|0.66025716|0.65733695|0.65590656|0.6486336|0.64857876|0.6482877|0.6472815|0.64158314|0.6413959|0.63956416|0.634…	1.4220926832656481e-47|1.3514880423946831e-39|4.571178503457291e-06|1.8911541557508236e-40|3.6472203205419923e-06|1.0|0.11749690966344357|4.988024928633691e-08|0.0005524171182618916|0.05455172532031138|1.5149572820029744e-78|0.06380024433197881|0.00558804188443441|1.8935382744509108e-36|5.423135876513776e-39|7.715972467594949e-06|4.4009277684423236e-12|1.0|1.0|2.4056191311471645e-08|1.87285030067…	8.671296849180781e-47|8.291337683402963e-39|1.0655427746986693e-05|1.6735877484520562e-39|9.400052372530908e-06|1.0|0.18188376108892193|1.7501841854855057e-07|0.0013539635251516953|0.10046358254200989|4.3284493771513546e-77|0.12432681275967|0.012390336772581839|3.054093991049856e-35|8.608152184942501e-38|2.911687723620735e-05|2.993828413906343e-11|1.0|1.0|1.1347260052580966e-07|2.926328594799691e…	1	1
GO:0000272	CHIT1 GAA PFKM PHKG2 CHIA MGAM PPP1R3D GABARAPL1 PYGM G6PC1 PGM2 PYGL AGL PYGB AOAH PPP1CA INS RB1CC1 STBD1 PPP1R3B	20	polysaccharide catabolic process	Glycogen Metabolism and Regulation	The primary biological process performed by this system of interacting proteins is glycogen metabolism and regulation. This process involves the synthesis, breakdown, and regulation of glycogen, a multi-branched polysaccharide that serves as a form of energy storage in cells. 1. Glycogen synthesis and breakdown: Several proteins in this system are directly involved in glycogen synthesis and break…	0.85	17	0.365689	2572	0.789422	negative regulation of lymphocyte activation	0.182166	10448	0.144588	regulation of glycogen metabolic process|glycogen metabolic process|regulation of glycogen biosynthetic process|regulation of glycogen catabolic process|regulation of glucose metabolic process|glucose homeostasis|glucose metabolic process|cellular glucose homeostasis|regulation of glycolytic process|regulation of gluconeogenesis|glucan metabolic process|glycogen biosynthetic process|regulation of…	0.8969467|0.8854138|0.80189246|0.77119005|0.76086974|0.7512052|0.7400112|0.7349936|0.71409017|0.7129176|0.70312726|0.70198107|0.6978367|0.69693124|0.6892551|0.68654215|0.6863145|0.6861265|0.68492496|0.68172026|0.6808881|0.6789618|0.6696956|0.6642904|0.66362584|0.6619567|0.6496912|0.6456176|0.6446544|0.6439327|0.6424445|0.64120173|0.6408884|0.63712513|0.6369941|0.63675|0.6359836|0.6347985|0.634093…	2.921994928621142e-10|4.488065273925395e-36|2.322313634740022e-08|1.2565821536994307e-15|0.006448004870418393|0.0001449105629348184|5.1370202745673234e-08|1.0|0.054557932149613735|0.058974459345952294|4.3900914238894775e-39|5.6250241822521204e-12|1.0|1.0|0.00015362392984506624|0.03217832203488009|0.008138544461422021|1.0|3.875708396293315e-06|1.8312774254125645e-51|1.0|0.0001472771815673975|1.691…	6.352162888306829e-10|2.594257383771905e-35|6.505080209355805e-08|5.584809571997469e-15|0.011272735787444744|0.00035087303374048043|1.7238323069017865e-07|1.0|0.09707817108472194|0.10801183030394192|5.853455231852637e-38|3.2142995327154975e-11|1.0|1.0|0.0005020389864217851|0.06648413643570267|0.020194899407995088|1.0|1.5441069307941493e-05|3.981037881331662e-50|1.0|0.0005078523502324052|7.1678619…	1	1
GO:0009147	CAD NME5 NME4 NME2 DCTPP1 ENTPD7 UCKL1 NME3 UCK2 TBPL1 DUT LOC100506422 TYMS NME1-NME2 UCK1 CMPK2 NME6 NME1 DTYMK AK3 NME7 CTPS2 NME9 CTPS1 ENTPD4	25	pyrimidine nucleoside triphosphate metabolic process	Nucleotide Metabolism and Synthesis	The primary biological process performed by this system of interacting proteins is nucleotide metabolism and synthesis. The proteins involved in this process are essential for the synthesis, degradation, and interconversion of nucleotides, which are the building blocks of DNA and RNA. 1. De novo synthesis of pyrimidines and purines: CAD, TYMS, and DTYMK are key enzymes in the de novo synthesis of…	0.96	24	0.638142	61	0.995006	regulation of immune complex clearance by monocytes and macrophages	0.227496	9058	0.258392	nucleotide metabolic process|nucleotide biosynthetic process|nucleic acid metabolic process|nucleotide-sugar metabolic process|nucleoside metabolic process|nucleoside biosynthetic process|nucleotide transport|regulation of nucleotide metabolic process|deoxyribonucleotide metabolic process|nucleobase metabolic process|nucleoside monophosphate metabolic process|regulation of nucleotide biosynthetic…	0.9262824|0.86289155|0.82862437|0.791237|0.78042006|0.75644726|0.7529417|0.7440165|0.7415368|0.7335163|0.7276089|0.72656536|0.7263311|0.722034|0.72143054|0.7177242|0.7172892|0.7169987|0.71332383|0.70753956|0.703641|0.70279753|0.7014407|0.70005786|0.6987487|0.6977649|0.6953399|0.693431|0.6927769|0.69004357|0.6884516|0.6879673|0.685048|0.6818604|0.67754376|0.6733402|0.67275894|0.672418|0.6719191|0.…	1.8897601835158085e-37|2.8084281387842588e-36|0.619886592259858|1.0|1.2267717731119653e-06|0.00021185605275516676|1.0|1.0|2.4409060320900404e-13|3.1007686559994967e-07|6.4588096229153264e-18|1.0|3.985666146521187e-14|6.519291974642205e-13|1.5720917762234048e-23|1.73648440168013e-13|1.0|1.0|1.0|1.530137935006149e-46|5.042353258585165e-13|1.186964615205283e-16|0.06072122389738331|3.009984517560805e…	9.544243351089942e-37|1.6328070574327087e-35|0.8331809035750779|1.0|3.3518354456611075e-06|0.0005068326620937004|1.0|1.0|1.4274304281228305e-12|1.0729303307956736e-06|4.6466256279966375e-17|1.0|2.4155552403158706e-13|4.2609751468249705e-12|1.6375956002327132e-22|1.3566284388126017e-12|1.0|1.0|1.0|2.8335887685299055e-45|3.27425536271764e-12|1.1304424906716981e-15|0.12316678275331301|4.560582602364…	1	1
GO:0050913	TAS2R46 TAS2R7 TAS2R4 TAS2R39 TAS2R14 TAS2R13 TAS2R30 TAS2R19 CST2 PIP RGS21 TAS2R16 TAS2R3 TAS2R10 TAS2R40 TAS2R8 RTP1 TAS2R5 RTP4 TAS2R60 TAS2R38 RTP3 GNAT2 RTP2 TAS2R43 TAS2R41 ITPR3 CALHM1 GNAT1 CA6 TAS2R20 LPO CST4 REEP2 TAS2R1 GNAT3 TAS2R50 TAS2R31 RTP5 PIGR TAS2R9 PLCB2 CST1 AZGP1	44	sensory perception of bitter taste	Bitter Taste Perception	The primary biological process performed by this system of interacting proteins is bitter taste perception. The majority of the proteins listed are taste 2 receptors (TAS2Rs), which are G protein-coupled receptors (GPCRs) responsible for detecting bitter compounds. These receptors are expressed in taste receptor cells (TRCs) within taste buds on the tongue. TAS2Rs (e.g., TAS2R46, TAS2R7, TAS2R4, …	0.977273	43	0.966816	1	0.999918	positive regulation of G protein-coupled receptor signaling pathway	0.287955	5516	0.548387	sensory perception of bitter taste|detection of chemical stimulus involved in sensory perception of bitter taste|sensory perception of sour taste|sensory perception of taste|sensory perception of sweet taste|sensory perception of umami taste|detection of chemical stimulus involved in sensory perception of taste|detection of chemical stimulus involved in sensory perception of sour taste|sensory pe…	0.96681577|0.88605374|0.7712685|0.74911433|0.7361285|0.7168133|0.715369|0.7073597|0.6892757|0.6753416|0.6073188|0.60531384|0.6046402|0.6032046|0.5857703|0.58187294|0.5638491|0.55926|0.5580121|0.55769813|0.55511147|0.5493403|0.54875684|0.54248|0.54147726|0.541426|0.5406835|0.54036|0.53595805|0.5355737|0.5299823|0.5284357|0.52754897|0.52543175|0.52385235|0.52174604|0.5200028|0.51687706|0.5149734|0.…	1.4013058178257518e-132|4.9964511714429476e-117|1.0|2.1071032283849887e-114|1.8414117610033626e-12|1.8414117610033626e-12|4.6736816591760016e-110|1.0|1.0|1.0|1.0|0.05012171783316744|2.229428570846945e-69|1.094510972603488e-58|4.0581702176348636e-60|1.0|1.0|1.0|1.0|1.0|1.0|1.0|1.0|1.0|1.0|1.0|1.0|1.0|1.0|1.0|1.0|1.0|1.0|1.0|1.0|1.0|1.0|1.0|1.0|2.234974596440507e-53|1.0|1.0|1.0|1.0|1.0|1.0|1.0|1.0|…	2.0018654540367883e-131|8.32741861907158e-116|1.0|4.483198358265933e-113|7.802592207641367e-12|8.294647572087219e-12|1.797569868913847e-108|1.0|1.0|1.0|1.0|0.09905477832641786|5.866917291702487e-68|2.4875249377352004e-57|9.437605157290382e-59|1.0|1.0|1.0|1.0|1.0|1.0|1.0|1.0|1.0|1.0|1.0|1.0|1.0|1.0|1.0|1.0|1.0|1.0|1.0|1.0|1.0|1.0|1.0|1.0|9.71728085408916e-52|1.0|1.0|1.0|1.0|1.0|1.0|1.0|1.0|1.0|1.0	1	1
GO:0002091	LRRTM1 UBQLN2 ANKRD13B PCSK9 LRPAP1 ANXA2 LRRTM2 ANKRD13A DLG4 MTMR2 ANKRD13D ATXN2 NECAB2 WDR54 SDCBP RIN3	16	negative regulation of receptor internalization	Regulation of Endocytosis and Synaptic Function	The system of interacting proteins primarily involves the regulation of endocytosis and synaptic function. The proteins involved in this process include LRRTM1, LRRTM2, UBQLN2, ANKRD13B, PCSK9, LRPAP1, ANXA2, ANKRD13A, DLG4, MTMR2, ANKRD13D, ATXN2, NECAB2, WDR54, SDCBP, and RIN3. 1. LRRTM1 and LRRTM2: These proteins are members of the leucine-rich repeat transmembrane neuronal proteins family, wh…	1	16	0.487049	432	0.964631	regulation of positive thymic T cell selection	0.415739	1419	0.883822	regulation of synaptic vesicle endocytosis|regulation of endocytosis|regulation of receptor-mediated endocytosis|regulation of synaptic vesicle recycling|positive regulation of synaptic vesicle endocytosis|synaptic vesicle endocytosis|regulation of synaptic vesicle exocytosis|regulation of endocytic recycling|regulation of postsynaptic neurotransmitter receptor internalization|presynaptic endocyt…	0.9048214|0.8518491|0.75399965|0.74260664|0.7357786|0.7338632|0.7337117|0.7315453|0.7309709|0.7238409|0.7151085|0.7041606|0.7038248|0.7032441|0.69310963|0.6906402|0.6795707|0.67463064|0.6689479|0.66870487|0.66590226|0.6656859|0.6637228|0.6623615|0.6594852|0.65704554|0.65184814|0.6504828|0.64370894|0.6435161|0.6410128|0.6356852|0.63533354|0.63410425|0.6340668|0.6336399|0.6314188|0.63141835|0.63078…	1.0|2.2952957133166077e-31|4.190206941877838e-36|1.0|1.0|1.0|1.0|1.0|1.0|1.0|1.0|1.0|0.01850995441390402|1.0|1.0|1.0|0.015290710438232233|1.0|0.0036102083243313983|1.0|1.0|1.0|1.0|1.0|6.294314176333587e-25|3.086156312604625e-24|1.0|1.0|1.0|1.0|0.0007549605355982942|1.0|0.022173187811867466|1.0|1.3848736092400432e-40|1.0|1.0|1.0|0.000743985244937764|1.0|1.0|3.917003951803291e-42|0.0773394697552102…	1.0|1.1954665173523998e-30|3.299375544785699e-35|1.0|1.0|1.0|1.0|1.0|1.0|1.0|1.0|1.0|0.036946016794219605|1.0|1.0|1.0|0.035809626319045045|1.0|0.009328703680442888|1.0|1.0|1.0|1.0|1.0|6.625593869824829e-24|3.5885538518658435e-23|1.0|1.0|1.0|1.0|0.0024275258379366374|1.0|0.055571899277863324|1.0|3.5509579724103674e-39|1.0|1.0|1.0|0.002909065984383889|1.0|1.0|1.3989299827868895e-40|0.17944192518610…	1	1
GO:1905564	PDPK1 FGFR1 GHSR APLN STAT3 HMGB1 FGF2 SP1 SIRT6 AKT3 GHRL MDK ADAM17 ITGA4 PLCG1 PROK1 NRARP IGF2	18	positive regulation of vascular endothelial cell proliferation	Growth Factor Signaling	The most prominent biological process performed by this system of interacting proteins is growth factor signaling. This process is crucial for cellular growth, differentiation, and survival. 1. Presence of growth factors and receptors: FGF2 and FGFR1 are key components of the fibroblast growth factor (FGF) signaling pathway. FGF2 is a growth factor that binds to FGFR1, a receptor tyrosine kinase,…	1	18	0.267978	6837	0.440233	striated muscle cell development	0.403535	1202	0.901588	cellular response to growth factor stimulus|signaling|response to growth factor|signal transduction|fibroblast growth factor receptor signaling pathway|positive regulation of signaling|regulation of cellular response to growth factor stimulus|cell-cell signaling|growth hormone receptor signaling pathway|insulin-like growth factor receptor signaling pathway|regulation of cell growth by extracellul…	0.7993789|0.7672199|0.7605365|0.7473656|0.7431755|0.73938996|0.73597014|0.72554183|0.7190125|0.71754307|0.7069844|0.704348|0.70208293|0.6964616|0.6956998|0.6872761|0.6857741|0.68201876|0.68198204|0.67438596|0.6741098|0.6732321|0.66885567|0.6672251|0.66385937|0.6580356|0.65465224|0.6534753|0.6525843|0.65108|0.6404886|0.6396665|0.6379282|0.6336403|0.63199246|0.62579215|0.6246122|0.62453496|0.623596…	3.06396921408932e-06|4.388400793057515e-07|4.089941263957205e-06|2.2121637685541718e-06|7.589435451389017e-05|9.204586893216419e-09|1.3213697704867253e-05|0.005477301644150298|0.00030787771659084034|1.53065093421075e-05|1.0|1.0|0.0006157340465574141|1.5904855679213324e-07|0.00029173050830139254|0.01746973058293456|0.00019026625793788733|4.515878920654339e-08|0.007327253282961414|1.0|1.0|1.0575443…	5.166895807907792e-06|9.161588294483331e-07|9.646087886691521e-06|5.408713370548098e-06|0.00016790786396878355|3.359338282195773e-08|3.5425463015729904e-05|0.010573941397973548|0.000775510621135618|4.624323064080816e-05|1.0|1.0|0.0016203527540984582|6.885218908750356e-07|0.0009031904281776859|0.03847958278179418|0.0006078794183319084|2.3277726395125458e-07|0.017741533372787926|1.0|1.0|5.778931006…	1	1
GO:2000648	KAT7 VEGFC HOXA3 HMX2 PDCD2 HMGA2 N4BP2L2 ELL3 SHOX2 KITLG EPCAM TP63 TERT PBX1 KDM1A FERMT2 CTNNB1 LTBP3 WNT1 NANOG CITED1 WNT10B FGF2 FGF10 RUNX2 KDR OSR2 THPO SIRT6 WNT5A ATXN1L GJA1 HNRNPU CCNE1 FGF8 TBX3 SOX11 PTPRC NR2E1 FGF9 TIAL1 FGF4 PRRX1 SOX9	44	positive regulation of stem cell proliferation	Angiogenesis and Skeletal Development	The primary biological process performed by this system of interacting proteins is angiogenesis and skeletal development. The proteins involved in this process are: 1. VEGFC: Vascular endothelial growth factor C is a key regulator of angiogenesis, promoting the growth of new blood vessels. It interacts with KDR, a receptor tyrosine kinase, to initiate signaling pathways that lead to endothelial c…	0.568182	25	0.30098	7022	0.425086	response to glycine	0.344427	4971	0.593008	blood vessel development|vasculature development|vasculogenesis|blood vessel morphogenesis|bone morphogenesis|angiogenesis|artery development|blood vessel maturation|circulatory system development|bone development|endothelial cell development|skeletal system development|embryonic skeletal system development|endochondral bone morphogenesis|bone cell development|skeletal system morphogenesis|blood …	0.81838703|0.81209177|0.7904707|0.78501487|0.7841308|0.77584463|0.76724267|0.76372606|0.75885236|0.7584693|0.7517096|0.74788|0.7355801|0.7332633|0.7275549|0.726156|0.7248297|0.7229886|0.72264016|0.7214525|0.7207653|0.72018814|0.7200836|0.71815026|0.7180947|0.7159027|0.7147585|0.7128757|0.70460993|0.7010447|0.69988966|0.69746256|0.6970577|0.69673127|0.69587374|0.69301784|0.6927768|0.69046336|0.689…	6.614110324303027e-12|1.247607035797893e-11|0.0011288194020060414|1.4807756016578918e-11|1.7695530414785315e-07|3.73142496006078e-10|0.02667984274246675|1.0|4.177668436513235e-14|4.2940886793040345e-13|1.0|5.621093247161511e-25|1.7617628426012423e-14|0.00044093375568808905|0.09778553241085394|3.317493212721573e-13|0.02787836906718204|9.902039207173996e-11|0.000992166817135901|0.04522214570847865|…	1.559931680260148e-11|3.5045141454996994e-11|0.0020981773271487756|5.4641166112837335e-11|5.219920476337851e-07|1.4866234900640556e-09|0.04454063896905969|1.0|2.50159786617559e-13|2.3337438474478448e-12|1.0|5.794941491919084e-24|1.1080269450322278e-13|0.0013281137219520753|0.18661361147109531|2.571700164900444e-12|0.061271140806993495|6.47192105044052e-10|0.0028592703663858823|0.08780999166694883…	1	1
GO:0060142	IL4R MAPK14 CXCL9 CD53 TMEM182 FLOT1 CFLAR ADGRB1 CAPN2 MYOG TNFSF14 TREM2 RAPGEF3 RIPOR2 MYOD1 CAMK1 SCGB3A1 PLEKHO1 DCSTAMP EHD1 IL4 GDF15 OCSTAMP GCM1 TYROBP ADAM9 CXCL10 EHD2 NFATC2	29	regulation of syncytium formation by plasma membrane fusion	Regulation of Immune Response and Cellular Differentiation	1. Immune response regulation: IL4, IL4R, CXCL9, CXCL10, TNFSF14, and TREM2 are involved in immune response regulation. IL4 and IL4R form a complex to activate downstream signaling pathways, such as JAK-STAT, which modulate immune cell differentiation and function. CXCL9 and CXCL10 are chemokines that recruit immune cells to sites of inflammation. TNFSF14 is a member of the tumor necrosis factor …	1	29	0.349294	2891	0.763304	positive regulation of telomere maintenance via telomere lengthening	0.209802	9222	0.244965	regulation of immune response|regulation of immunoglobulin mediated immune response|T cell differentiation involved in immune response|regulation of immune system process|regulation of leukocyte differentiation|regulation of adaptive immune response|regulation of T cell differentiation|regulation of lymphocyte differentiation|regulation of immune effector process|immune response|regulation of inf…	0.8338889|0.77694285|0.7634362|0.76281273|0.7580919|0.75417113|0.748098|0.7469007|0.7462318|0.72193795|0.7202785|0.7183038|0.7180959|0.7165003|0.7037687|0.7027353|0.6910444|0.6890093|0.68507797|0.6833495|0.6823293|0.68094134|0.6794165|0.67854166|0.6776595|0.67661333|0.6763572|0.67512655|0.6712837|0.67059267|0.6692478|0.66827655|0.667755|0.6668197|0.66411614|0.6625807|0.6619729|0.65984863|0.656592…	0.0003772523762503696|0.0050611795885480695|0.0076613054512138625|1.3216251092274397e-06|1.1978495973785436e-05|0.004257958469412305|0.035854953927787786|0.04758318086063833|0.0035039633908509065|6.785177249655341e-06|0.002389577655722038|0.13873554707847904|1.0|0.0006754338411902749|0.035854953927787786|1.0|1.0|0.1830281572492556|4.691805805171445e-05|1.0|1.0|0.0006802404029514003|1.0|1.0|0.0203…	0.0005358698526283659|0.00735280475651336|0.012337045815159198|3.279466772276525e-06|2.8863845719964906e-05|0.008465126181734206|0.05792399665232276|0.07826181062604988|0.0075679554877989335|2.1608844744125287e-05|0.005408215970071257|0.25362988496979716|1.0|0.0019577792498268838|0.07548411353218482|1.0|1.0|0.3370684295566401|0.0001595852314684165|1.0|1.0|0.0021732920222089463|1.0|1.0|0.048821354…	1	1
GO:0101023	FGFR1 AKT3 GHRL ITGA4 NRARP IGF2 COL4A3 GHSR ADAM17 PPARG FGF2 FLT1 PDPK1 SP1 SIRT6 CCL2 MDK PLCG1 APLN STAT3 HMGB1 MEF2C ALDH1A2 DBH PROK1	25	vascular endothelial cell proliferation	Cell Proliferation and Differentiation	1. FGFR1 and FGF2 interaction: FGFR1 (fibroblast growth factor receptor 1) is a receptor tyrosine kinase that binds to FGF2 (fibroblast growth factor 2), leading to cell proliferation, differentiation, and migration. This interaction is crucial for tissue repair and embryonic development. 2. AKT3 and PDPK1 interaction: AKT3 (protein kinase B) is a serine/threonine kinase that plays a role in cell…	1	25	0.464669	1034	0.915343	detection of mechanical stimulus involved in sensory perception of pain	0.22886	9444	0.226789	cell differentiation|cell development|cell division|cell growth|cellular developmental process|cell population proliferation|developmental cell growth|cell morphogenesis involved in differentiation|cell maturation|regulation of cell differentiation|cellular process|cellular biosynthetic process|cell dedifferentiation|tissue development|cell cycle process|regulation of cell development|stem cell d…	0.8602643|0.812197|0.8038892|0.79159|0.78980184|0.78796506|0.77749765|0.7654089|0.7558267|0.7398808|0.7361132|0.7276916|0.7275125|0.7262271|0.7243377|0.71924686|0.7105148|0.7068798|0.7020086|0.70177|0.6916463|0.68749404|0.68325245|0.6823597|0.680127|0.6781792|0.6680261|0.66678107|0.6665466|0.66565144|0.6651809|0.6624434|0.66076815|0.6588656|0.6583556|0.6579194|0.6577923|0.6577532|0.65647537|0.655…	7.135389125458648e-06|3.643850302380221e-05|0.012828952580775576|0.15928506428482933|7.74103375108113e-06|2.3827644372963646e-24|0.27716553502897817|0.08777806656970041|0.24106612887559878|3.9299244367762046e-05|0.19790229669071016|0.03481807963878702|1.0|8.250516422690087e-08|0.26495262269863934|0.001233931030387473|2.5504000160929157e-05|0.11039500460934495|1.0|0.00014790013748708058|0.01836202…	1.1564650122299267e-05|6.460727486489754e-05|0.0201396429839491|0.2215369461541437|1.9256302863385897e-05|1.527413100831003e-23|0.4174179744412322|0.1369392614191894|0.4031206168488274|0.0001149100712507662|0.31817089500114176|0.06991582256784541|1.0|3.6668961878622604e-07|0.4826095131122756|0.0033530734521398727|9.30802925581356e-05|0.21148468315966465|1.0|0.00044149294772262855|0.03972462427217…	1	1
GO:0003401	BMP4 HOXD13 TRIM28 WNT11 FGF1 SFRP2 MAGI2 MED1 SFRP1 HNF1B SIX1 FGF10 NKD1 WNT3A RDH10 SIX4 WNT5A MED12 ESR1 AREG YAP1 SPRY2 PTK7 SHH SPRY1 FGFR2 SOX9	27	axis elongation	Limb Development and Differentiation	1. Limb development and differentiation: The majority of the proteins in this system are involved in limb development and differentiation. BMP4, HOXD13, WNT11, FGF1, FGF10, WNT3A, WNT5A, SHH, and SOX9 are all key players in limb development, specifically in the formation of the limb bud, patterning, and differentiation of limb structures. 2. Bone morphogenetic proteins (BMPs): BMP4 is a member of…	1	27	0.452199	1315	0.892337	regulation of presynaptic cytosolic calcium ion concentration	0.201648	9603	0.213771	limb development|limb morphogenesis|limb epidermis development|embryonic limb morphogenesis|limb bud formation|limb joint morphogenesis|appendage development|tissue development|skin development|embryonic digit morphogenesis|embryonic skeletal limb joint morphogenesis|cellular developmental process|hindlimb morphogenesis|cell development|skeletal system development|cell morphogenesis involved in d…	0.951853|0.88916373|0.84295416|0.84207785|0.7960229|0.7906511|0.7373756|0.72565186|0.7217787|0.7094702|0.70867026|0.702287|0.7021649|0.70046055|0.69979334|0.69802094|0.69703823|0.69675744|0.6961949|0.6936404|0.6915711|0.6884161|0.6878902|0.6846084|0.68450665|0.68172944|0.67727274|0.6759744|0.67407346|0.6715773|0.6699485|0.6683972|0.6675957|0.6658822|0.662825|0.66218567|0.65983915|0.6596316|0.6575…	8.645657266367181e-14|8.855260615028746e-15|1.0|4.842568415826274e-10|1.5971260606035474e-09|1.0|8.645657266367181e-14|3.250943754936748e-26|3.2942624830607403e-07|2.36651540986349e-08|1.0|4.847173516929752e-15|2.204220184900458e-05|4.850696854978441e-10|1.1307666021044875e-14|0.026012322401371548|6.006329936566737e-21|3.3135145140133955e-16|2.0792660452734073e-13|0.00045626418020466186|0.0325739…	2.269201382248604e-13|2.811193846040872e-14|1.0|1.5324583594386943e-09|5.584356855257159e-09|1.0|4.57442183405671e-13|2.982517206363989e-25|1.1320489632511137e-06|9.1725403483081e-08|1.0|3.3428782875377604e-14|6.953375977603968e-05|2.6948315860991342e-09|9.119085500842641e-14|0.05476278400288747|6.389712698475253e-20|2.9065916789591188e-15|1.474656769697452e-12|0.0012638896958577892|0.06647740403…	1	1
GO:0055062	UMOD ENPP3 ALPL SLC34A3 SLC17A8 SLC17A7 SFRP4 SLC34A1 PTH ANKH SLC17A6 ENPP1 ABCC6 FGFR4 SLC34A2 SLC9A3R1 TFAP2B FGF23 XPR1 GCM2	20	phosphate ion homeostasis	Phosphate Homeostasis	The primary biological process performed by this system of interacting proteins is phosphate homeostasis, which involves the regulation of phosphate levels in the body. This is crucial for maintaining proper cellular function, bone mineralization, and overall health. 1. UMOD, ENPP3, and ALPL: These proteins are involved in the regulation of extracellular pyrophosphate (ePPi) levels. UMOD inhibits…	1	20	0.980254	1	0.999918	positive regulation of cytokine-mediated signaling pathway	0.182028	10112	0.172098	phosphate ion homeostasis|cellular phosphate ion homeostasis|regulation of phosphate metabolic process|phosphorus metabolic process|regulation of phosphorus metabolic process|inorganic ion homeostasis|phosphate-containing compound metabolic process|regulation of renal phosphate excretion|phosphate ion transport|regulation of phosphate transport|cellular response to phosphate starvation|phosphate …	0.98025393|0.90481323|0.7981426|0.79221493|0.78621054|0.7693665|0.765309|0.7286322|0.72304523|0.7173056|0.7063243|0.6916646|0.6857054|0.6839032|0.6830775|0.67606544|0.6687367|0.66293585|0.66039425|0.6518376|0.64872986|0.6467891|0.6465779|0.64085144|0.64064443|0.6387377|0.63864875|0.63307786|0.63258994|0.631228|0.6251665|0.62031543|0.61815155|0.6156416|0.61534846|0.61337376|0.6126679|0.61018807|0.…	5.1072778161729495e-67|3.062857422162432e-31|0.018888758068911358|0.00047964730258694154|0.018942926217036683|1.3627787994905372e-29|0.002203424287758408|0.0023317488953917016|3.9811934267803524e-24|2.7088203228690534e-08|3.875708396293315e-06|3.172970188795223e-09|1.8791987249831513e-29|1.0|1.4442118811685702e-53|1.266845049767854e-09|9.39522851652745e-11|0.004658331988236538|0.00233174889539170…	3.8986853558572133e-66|1.578792485650738e-30|0.028750012281448033|0.000938644427763095|0.030751503599085524|9.804164025111778e-29|0.004415679935387592|0.004729713783755987|3.492274935772239e-23|1.0339008865912417e-07|1.3137994563706155e-05|1.5402767906772928e-08|2.4405178246534434e-28|1.0|2.8884237623371404e-52|7.197983237317352e-09|5.592397926504435e-10|0.012226091189820255|0.006168647871406618|…	1	1
GO:0060088	SCRIB SEC24B STRC PLS1 PDZD7 TRIOBP TPRN CLRN1 WHRN GRXCR2 CLRN2 LHFPL5 SOD1 CDH23 MYO7A SLC9A3R1	16	auditory receptor cell stereocilium organization	Hair Cell Stereocilia Development and Maintenance	The primary biological process performed by this system of interacting proteins is the development and maintenance of hair cell stereocilia, which are essential for auditory and vestibular functions. The proteins involved in this process include SCRIB, STRC, PLS1, PDZD7, TRIOBP, TPRN, CLRN1, WHRN, GRXCR2, CLRN2, LHFPL5, CDH23, MYO7A, and SLC9A3R1. 1. Stereocilia bundle formation and cohesion: CDH…	1	16	0.806518	3	0.999754	meiotic cell cycle phase transition	0.372215	2580	0.788767	stereocilium maintenance|inner ear receptor cell stereocilium organization|auditory receptor cell stereocilium organization|neuromast hair cell development|hair cell differentiation|inner ear receptor cell development|inner ear auditory receptor cell differentiation|vestibular receptor cell development|inner ear receptor cell differentiation|auditory receptor cell development|auditory receptor ce…	0.8670559|0.83086336|0.8065177|0.7808792|0.7668084|0.7273475|0.70703316|0.70375067|0.6931448|0.68816566|0.68378353|0.6694691|0.66871774|0.6632951|0.66311395|0.66099197|0.6558322|0.6541941|0.65001637|0.6472591|0.6463101|0.6394999|0.6302144|0.6271759|0.62541604|0.61832553|0.614293|0.6138476|0.6126813|0.61073303|0.6097397|0.6066818|0.6061614|0.60508823|0.6029115|0.6028435|0.60083437|0.59993994|0.597…	2.4481968640552314e-06|4.410196481459501e-46|3.779726368240596e-55|1.0|3.917003951803291e-42|2.444070941279263e-43|1.5750679399719685e-43|0.0018656168522933451|1.0331596767420938e-40|9.266263772689358e-50|5.782981343322304e-53|1.0|1.0|1.0|8.487554770295262e-37|3.851042812409249e-32|1.0|1.0|1.0|1.0|1.0|1.0|2.4481968640552314e-06|1.0|1.0|1.0|1.0|1.0|1.0|1.0|1.0|1.0|1.0|1.0|1.0|1.0|1.0|1.0|1.0|1.0|1…	4.163600108937468e-06|2.937441177554269e-45|3.896625121897522e-54|1.0|4.080212449795095e-41|2.3961479816463363e-42|1.8530211058493747e-42|0.003846632685140918|1.341765813950771e-39|1.519059634867108e-48|1.091128555343831e-51|1.0|1.0|1.0|1.2859931470144336e-35|7.001896022562271e-31|1.0|1.0|1.0|1.0|1.0|1.0|1.0116515967170378e-05|1.0|1.0|1.0|1.0|1.0|1.0|1.0|1.0|1.0|1.0|1.0|1.0|1.0|1.0|1.0|1.0|1.0|1.…	1	1
GO:0002762	TMEM178A GPR137B LRRC17 ADIPOQ NF1 LILRB1 LILRB3 LTF FBN1 MAFB INHBA GPR55 UBASH3B GPR137 GATA2 TCTA C1QC PTPN2 LOC107987462 SFRP1 INPP5D RARA CTNNB1 IAPP CCL3 TNFRSF11B ZBTB46 INHA MYC CEACAM1 HOXA7 LYN TNFAIP6 CUL4A GPR68 TLR4 LILRB4 APCS CARTPT IL4 CLDN18 TOB2 PIK3R1 TRIB1 ZNF675 ZFPM1 PIAS3 LOC102725035 TLR3 CDK6 FSTL3 FBXW7	52	negative regulation of myeloid leukocyte differentiation	Immune Regulation and Cell Signaling	The primary biological process performed by this system of interacting proteins is immune regulation and cell signaling. The proteins involved in this process are: 1. TMEM178A: This protein is involved in the regulation of the immune response by negatively regulating the NFAT signaling pathway, which is crucial for immune cell activation. 2. LRRC17: This protein is a negative regulator of osteocl…	0.346154	18	0.259819	8130	0.33437	heart induction	0.329898	4171	0.658507	immune response-regulating signaling pathway|immune response-regulating cell surface receptor signaling pathway|immune response-inhibiting signal transduction|regulation of immune response|immune response-inhibiting cell surface receptor signaling pathway|regulation of immune system process|immune response-activating signaling pathway|immune response-activating cell surface receptor signaling pat…	0.8309541|0.8125948|0.80757785|0.7902939|0.78886414|0.7820342|0.7453189|0.7418649|0.7225935|0.7205435|0.71251595|0.712299|0.7101556|0.7082475|0.70725|0.70606565|0.69741964|0.6960453|0.69434047|0.69283223|0.6911808|0.6833031|0.6808507|0.67918986|0.67909086|0.6750227|0.66959536|0.66814375|0.66630137|0.66470355|0.66413856|0.6639934|0.6601771|0.6599038|0.6596811|0.6576011|0.6572753|0.6563008|0.655408…	4.470170710108662e-06|3.4048029015044795e-06|4.268123778758388e-06|8.233856571341526e-07|2.182203773161509e-06|2.0046970424446647e-57|2.3341762999938874e-05|1.9140001576190072e-05|2.7244595036110876e-45|2.6496314178489627e-08|8.207144910117542e-11|0.00018444907128613725|0.17445693466805598|0.12258544270838714|3.926031648708699e-05|0.012875889904912683|0.00031487577850003277|0.002868510353178318|5…	7.43788803678646e-06|6.598455235473797e-06|1.0042644185313854e-05|2.0636232008374754e-06|5.757793596732214e-06|2.474934620302055e-56|6.062795584399707e-05|5.104000420317353e-05|3.83726690649449e-44|1.0151844512831274e-07|4.2304870670708977e-10|0.0005589365796549613|0.3023517065304263|0.23849307919919677|0.00014071798024045516|0.02906521423230854|0.0009839868078126025|0.007816104504573073|2.908683…	1	1
GO:1903319	CLEC3B NLRC4 MYH9 LPCAT3 F12 CCBE1 TNP2 MMP14 ANGPTL8 ADAM8 S100A10 ASTL BAG2 ENO1 GSN KLKB1 MELTF PLGRKT RHBDD1 HPN ANXA2 TNP1 SPON1 CNTN2 NKD2 SOX4 SRC TFR2	28	positive regulation of protein maturation	Inflammation and Extracellular Matrix Remodeling	The system of interacting proteins primarily involves biological processes related to inflammation and extracellular matrix (ECM) remodeling. 1. Inflammation-related proteins: - CLEC3B (Tetranectin): Binds to plasminogen and may play a role in the regulation of plasminogen activation, which is involved in inflammation and wound healing. - NLRC4 (NLR family CARD domain-containing protein 4): Invol…	0.464286	13	0.271657	8979	0.26486	microglial cell activation	0.430162	1287	0.894629	inflammatory response|chronic inflammatory response|tissue remodeling|wound healing involved in inflammatory response|neuroinflammatory response|inflammatory response to wounding|connective tissue replacement involved in inflammatory response wound healing|extracellular matrix-cell signaling|regulation of inflammatory response|production of molecular mediator involved in inflammatory response|reg…	0.70654726|0.7008245|0.6969899|0.6968675|0.6961266|0.66831934|0.6670078|0.66327405|0.653711|0.6408454|0.6303347|0.6222383|0.6214483|0.6211123|0.6207603|0.6197437|0.6182581|0.6170897|0.6127285|0.60985774|0.6073122|0.6062673|0.597425|0.5964962|0.59646374|0.58996403|0.58975375|0.5857363|0.5850121|0.582776|0.577412|0.57690734|0.5761101|0.5753213|0.5746733|0.5742732|0.5724241|0.57111156|0.56926924|0.5…	2.8529384281360077e-05|1.0|0.002486255785786331|1.0|1.0|1.0|1.0|1.0|2.5971644031622143e-05|1.0|1.0|1.0369348695004811e-05|0.11269573929493058|1.0|1.0|1.0|5.246851827239054e-08|1.0|1.0|1.0|0.0061258779944637215|3.2417567161511743e-05|1.0|0.15115130309396263|1.0|1.0|1.0|1.0|0.15258487857653033|0.013847174545314962|1.0|1.0|1.0|0.06794947877884888|0.009426587498208922|1.0|0.023255560124387842|1.0|1.0…	4.41631335624769e-05|1.0|0.004331456072798487|1.0|1.0|1.0|1.0|1.0|7.54989652082039e-05|1.0|1.0|3.539026858363417e-05|0.19910908002637914|1.0|1.0|1.0|2.597451399623294e-07|1.0|1.0|1.0|0.014868635908892529|0.00012187055323876594|1.0|0.2996462148799875|1.0|1.0|1.0|1.0|0.2997738282446568|0.04025341437591559|1.0|1.0|1.0|0.15167294370278767|0.026813607304161022|1.0|0.06495966515192135|1.0|1.0|0.1769863…	1	1
GO:0009219	UPP1 DCTPP1 OGG1 TDG DPYD MBD4 NEIL1 SHMT1 NTHL1 UNG TBPL1 UPB1 DUT LOC100506422 TYMS DCTD UPP2 TYMP CMPK2 DPYS NEIL2 DTYMK SMUG1 NT5M NT5C	25	pyrimidine deoxyribonucleotide metabolic process	DNA Repair and Pyrimidine Metabolism	1. DNA Repair: - UPP1, OGG1, TDG, MBD4, NEIL1, NTHL1, UNG, NEIL2, and SMUG1 are involved in DNA repair processes. - OGG1, NEIL1, and NEIL2 are DNA glycosylases that initiate base excision repair (BER) by recognizing and removing damaged bases. - TDG and MBD4 are also DNA glycosylases, specifically involved in removing mismatched bases during replication. - NTHL1 is an endonuclease that cleaves DN…	1	25	0.752454	1	0.999918	peptidyl-threonine phosphorylation	0.28669	6523	0.465941	pyrimidine deoxyribonucleotide metabolic process|pyrimidine deoxyribonucleoside monophosphate metabolic process|DNA metabolic process|pyrimidine nucleobase metabolic process|pyrimidine nucleoside metabolic process|deoxyribonucleoside metabolic process|pyrimidine nucleotide metabolic process|pyrimidine deoxyribonucleoside triphosphate metabolic process|deoxyribonucleoside monophosphate metabolic p…	0.7524539|0.7371104|0.7320031|0.7304466|0.72459877|0.71703184|0.7140118|0.70571923|0.7054485|0.7002759|0.6996635|0.69569325|0.6940489|0.6936512|0.69205326|0.691914|0.685866|0.6844087|0.6842849|0.67993534|0.67563117|0.6749072|0.6735998|0.6660573|0.66531277|0.6581121|0.65628576|0.6529913|0.65267843|0.6512705|0.6501527|0.6498022|0.64960176|0.64927965|0.64207923|0.64110446|0.64045244|0.6383753|0.6360…	2.212133172717179e-81|2.941017611456849e-39|5.496100929799892e-09|1.676422103741351e-08|6.648209003785147e-13|0.0001113698518613189|1.9996271698307153e-66|5.570244312899874e-21|1.517519647403148e-32|7.012176416641617e-69|1.0|1.0|1.0|3.116522851831533e-69|0.00018377281736489033|3.6126353591119663e-12|1.0|0.024512808609662737|0.0131141965264038|2.7386883462425603e-09|2.4934112810290462e-14|1.454377…	1.9404676953659463e-80|1.7824349160344536e-38|1.5977037586627593e-08|4.81730489580848e-08|2.9416853999049323e-12|0.0002736359996592602|3.7030132774642877e-65|4.126106898444351e-20|1.7244541447763046e-31|1.4608700868003368e-67|1.0|1.0|1.0|7.991084235465468e-68|0.0005909093805945027|2.6178517095014247e-11|1.0|0.053288714368832035|0.030498131456753026|1.4803720790500325e-08|1.7315356118257266e-13|2.…	1	1
GO:0090136	CYP1B1 ITGB5 CCN3 VCL KIFC3 CTNNA3 SRF DSP CAMSAP3 IHH BVES JUP CTNNA1 KIT SERPINB8 PLEKHA7 THBS4	17	epithelial cell-cell adhesion	Cell Adhesion and Signaling Regulation	The system of interacting proteins primarily involves cell adhesion and signaling regulation. The proteins involved in these processes are ITGB5, CCN3, VCL, CTNNA3, DSP, CAMSAP3, IHH, BVES, JUP, CTNNA1, KIT, SERPINB8, and PLEKHA7. 1. Cell Adhesion: The proteins CTNNA1, CTNNA3, JUP, and DSP are all part of the cadherin-catenin complex, which plays a crucial role in cell-cell adhesion. VCL is a cyt…	0.941176	16	0.550063	183	0.985017	pyrimidine nucleotide catabolic process	0.197343	11013	0.0983298	regulation of cell adhesion|regulation of cell-cell adhesion|regulation of cell-substrate adhesion|cell-cell signaling|cell-cell adhesion in response to extracellular stimulus|regulation of cell-matrix adhesion|regulation of cell-cell adhesion mediated by integrin|cell adhesion|regulation of calcium-dependent cell-cell adhesion|cell surface receptor signaling pathway|cell surface receptor signali…	0.8399601|0.83235586|0.80845517|0.7844916|0.7702506|0.764122|0.7520056|0.75143534|0.7495974|0.7458663|0.7457956|0.74103296|0.7342664|0.7303498|0.7250099|0.72240496|0.7071931|0.7069395|0.7050276|0.6965975|0.6959671|0.6957515|0.6947762|0.69207984|0.6905874|0.68928576|0.68716013|0.6864631|0.6859834|0.6811944|0.67923206|0.6782833|0.6692294|0.66881263|0.6681902|0.6613567|0.6590625|0.6564007|0.6559706|…	6.990582851708122e-05|0.3836739209560044|0.0011769791493492048|0.019519013891185565|1.0|0.00021690836206818972|1.0|1.087133318860163e-18|1.0|0.011423669128363968|0.4338550330619916|1.0|0.047512127464573874|0.03456951015246824|0.009653767319317547|3.7500089039429653e-22|1.0|0.05165358367174552|8.782504202418458e-07|1.0|0.001799337139953457|0.020629140734597005|1.0|0.017993366319682406|1.0|1.0|0.00…	0.00010527986222451991|0.47250482876355215|0.002167549077991169|0.030450879705437698|1.0|0.0005176810550553455|1.0|7.54953693652891e-18|1.0|0.023409158049926163|0.6875674058034732|1.0|0.08814865948900533|0.07339598758485825|0.023318278549076202|4.9342222420302174e-21|1.0|0.10414028966077726|3.8184800880080245e-06|1.0|0.00486307335122556|0.04947036147385373|1.0|0.04335750920405399|1.0|1.0|0.006606…	1	1
GO:0032717	KLF4 MAP2K5 MAPKBP1 CACTIN PTPN22 SSC5D BCL3 TLR9 OTUD7B BPI CD33 TMSB4X ARRB1 ELANE ANXA4 TLR6 IL10 ANXA1	18	negative regulation of interleukin-8 production	Inflammatory Response Regulation	Proteins KLF4, MAP2K5, MAPKBP1, CACTIN, PTPN22, SSC5D, BCL3, TLR9, OTUD7B, BPI, CD33, TMSB4X, ARRB1, ELANE, ANXA4, TLR6, IL10, and ANXA1 interact to regulate the inflammatory response in cells. This process is crucial for maintaining immune system homeostasis and preventing excessive inflammation. 1. TLR9 and TLR6 activation: Both TLR9 and TLR6 are Toll-like receptors that recognize pathogen-asso…	1	18	0.258802	8472	0.30637	startle response	0.401067	1995	0.836663	regulation of inflammatory response|inflammatory response|regulation of acute inflammatory response|regulation of inflammatory response to antigenic stimulus|regulation of neuroinflammatory response|regulation of chronic inflammatory response|regulation of immune response|positive regulation of inflammatory response|regulation of inflammatory response to wounding|regulation of acute inflammatory …	0.96782136|0.87474644|0.8628423|0.8281362|0.8260507|0.82055414|0.7823856|0.7709544|0.7690541|0.7680383|0.7659925|0.7650169|0.7627316|0.7555064|0.7414707|0.7279985|0.7186681|0.7164691|0.7094023|0.70640457|0.6941576|0.69010454|0.6819515|0.68186|0.67747915|0.6765329|0.67447495|0.67089736|0.6703627|0.6687724|0.6660867|0.66587454|0.665799|0.6624207|0.6621822|0.66169715|0.6580793|0.657275|0.65617967|0.…	1.5393231287157732e-06|9.268528582926347e-06|1.0|0.04421617512821749|1.0|0.010451956811732856|8.42832941668203e-07|0.1418312504114167|1.0|1.0|0.0004982389238600005|0.11226952074729163|0.003146484119345115|0.06906757260479458|0.0004959115932521367|1.0|0.01977042516495803|0.002617751441186719|0.0572160574035441|5.865575519093945e-05|0.0005979168406605077|1.0|4.264785242903497e-06|0.0174697305829345…	2.640348419752613e-06|1.7324352491451116e-05|1.0|0.06531192781125182|1.0|0.019303686044376985|2.4935885848171685e-06|0.21686735536913868|1.0|1.0|0.0012677835212722658|0.20945806109569332|0.007200192492780584|0.13813514520958917|0.00148922400376017|1.0|0.045137956997621076|0.007211436477098399|0.11748677084916653|0.0001832992349716858|0.0017534218201187906|1.0|1.726633701580363e-05|0.0424022586964…	1	1
GO:0010884	APOC4 OSBPL11 CIDEA NR1H2 LPL FITM1 NFKB1 PLIN2 VSTM2A PLIN5 ZC3H12A FITM2 SREBF2 HILPDA SCARB1 EHD1 ACACB PLA2G10 APOB IKBKE CD36 C3 MSR1 PLIN3	24	positive regulation of lipid storage	Lipid Metabolism and Inflammation Regulation	1. Lipid metabolism and storage: - APOC4, LPL, and APOB are involved in lipoprotein metabolism, specifically in the transport and clearance of lipids in the bloodstream. - CIDEA, FITM1, FITM2, PLIN2, PLIN3, and PLIN5 are lipid droplet proteins that regulate lipid storage and mobilization in adipocytes and other cells. - NR1H2, SREBF2, and SCARB1 play roles in the regulation of cholesterol and lip…	1	24	0.492559	307	0.974865	cilium organization	0.280065	6304	0.483871	lipid homeostasis|regulation of lipid metabolic process|lipid metabolic process|triglyceride homeostasis|response to lipid|regulation of intracellular lipid transport|regulation of cardiolipin metabolic process|lipoprotein metabolic process|regulation of membrane lipid metabolic process|cellular response to lipid|regulation of lipid biosynthetic process|regulation of lipoprotein metabolic process…	0.80549526|0.7985268|0.76410866|0.73489666|0.7280937|0.72217953|0.7172227|0.7123507|0.711902|0.7117834|0.71050334|0.70857143|0.70691115|0.6966586|0.6945609|0.6934178|0.69262445|0.6925884|0.6900225|0.68693054|0.6773108|0.6725072|0.66827375|0.6668347|0.65759563|0.65649015|0.6512693|0.64778316|0.6464784|0.64627177|0.6428899|0.6404854|0.63256896|0.63233185|0.6277373|0.62719786|0.62714624|0.6261089|0.…	4.177901863910649e-13|3.7674314687060814e-10|2.758768588689009e-11|1.8907626827558335e-07|0.0012682232180454094|1.0|1.0|0.17873765172675599|1.0|0.00012945849704745088|2.604279561547967e-09|1.0|3.661811440765655e-05|2.9849897251009316e-08|0.009759421960132544|6.977151342044538e-50|1.5601521978054161e-06|1.0|2.497089679723588e-09|1.8414102764233764e-64|1.0|1.0|0.001116826896776364|4.01794059886237e…	1.0740107619307582e-12|9.81101944975542e-10|9.19589529563003e-11|4.936717187352045e-07|0.002453042974942765|1.0|1.0|0.271637768581696|1.0|0.0003556552116688211|1.16783836840716e-08|1.0|0.00011349927765451846|1.3746295935675535e-07|0.02351667942200613|1.9380975950123718e-48|6.473660571806706e-06|1.0|1.3950221674433452e-08|4.721564811341991e-63|1.0|1.0|0.003323889573739178|2.449963779794128e-09|1.0…	0.447212	1
GO:0051917	HRG FAP PLAUR CPB2 F12 SERPINF2 F11 PLAU SERPINE1 APOH F2 PLAT KLKB1 THBD VTN THBS1 USF1 PLG	18	regulation of fibrinolysis	Fibrinolysis Regulation	Proteins: HRG, FAP, PLAUR, CPB2, F12, SERPINF2, F11, PLAU, SERPINE1, APOH, F2, PLAT, KLKB1, THBD, VTN, THBS1, USF1, PLG. 1. Central process: Fibrinolysis regulation is the primary biological process performed by this system of interacting proteins. Fibrinolysis is the enzymatic breakdown of fibrin, a key component of blood clots, and is essential for maintaining vascular patency and preventing th…	1	18	0.959368	1	0.999918	regulation of hemoglobin biosynthetic process	0.369128	2140	0.824791	regulation of fibrinolysis|fibrinolysis|negative regulation of fibrinolysis|positive regulation of fibrinolysis|regulation of plasminogen activation|regulation of hemostasis|regulation of blood coagulation|regulation of coagulation|regulation of proteolysis|regulation of catabolic process|blood coagulation, fibrin clot formation|regulation of cellular catabolic process|regulation of platelet acti…	0.9593684|0.84800434|0.729218|0.71726584|0.68068945|0.6686663|0.65796125|0.6500146|0.64363724|0.6370836|0.60378104|0.5911497|0.58667684|0.5720997|0.5704702|0.5697089|0.56951624|0.5675845|0.56757134|0.5673372|0.5648651|0.5638486|0.5584483|0.55642116|0.554674|0.5539626|0.55238605|0.550363|0.54989266|0.54877543|0.54749274|0.5466491|0.5466078|0.5457612|0.54549956|0.54443514|0.5425167|0.5421528|0.5416…	3.942240572111155e-61|1.8476591669264198e-54|4.845612540615423e-42|8.502266327251993e-13|1.030365194316433e-20|1.6333526526152123e-44|9.144474357964204e-45|2.8647308536373965e-44|4.846014283943701e-13|0.6577616443105453|6.546696166642807e-07|1.0|2.2026548928108388e-05|0.015639162135536348|0.07298670969446501|1.0|1.0|1.0|1.0|1.0|1.0|1.0|1.0|0.002091488410594478|1.0|1.0|3.923412180984546e-05|1.0|4.…	2.7959152993696137e-60|1.4434837241612654e-53|4.4051023096503845e-41|3.36057957598893e-12|6.207019242870078e-20|1.6171808441734774e-43|1.0886278997576433e-43|4.092472648053423e-43|2.7850656804274142e-12|1.0|2.4337160470791103e-06|1.0|6.953375977603968e-05|0.03595626499158493|0.14227428790344057|1.0|1.0|1.0|1.0|1.0|1.0|1.0|1.0|0.0061878355343031885|1.0|1.0|0.0001713280428377531|1.0|6.9671430380068…	1	1
GO:0035812	ADORA1 UTS2 ACE ADORA2A TACR1 CORIN MLLT6 DRD3 OXT ATP6V1B1 EDN1 AVP EDNRB AGTR1 DRD2 NPPB AVPR1A AVPR2 SNX5 NPR1 GNAI2 SPX AGT	23	renal sodium excretion	Renin-Angiotensin-Aldosterone System (RAAS) Regulation	1. Key proteins involved in RAAS regulation: - ACE (Angiotensin-converting enzyme): Converts angiotensin I to angiotensin II. - AGT (Angiotensinogen): Precursor of angiotensin I and II. - AGTR1 (Angiotensin II receptor type 1): Receptor for angiotensin II, mediates vasoconstriction and aldosterone secretion. - EDN1 (Endothelin-1): Potent vasoconstrictor, interacts with angiotensin II. - EDNRB (En…	1	23	0.477255	294	0.975929	cell killing	0.1946	10642	0.128705	renin-angiotensin regulation of aldosterone production|regulation of systemic arterial blood pressure by renin-angiotensin|regulation of systemic arterial blood pressure by circulatory renin-angiotensin|regulation of blood volume by renin-angiotensin|regulation of renal output by angiotensin|regulation of renin secretion into blood stream|regulation of angiotensin-activated signaling pathway|regu…	0.85662997|0.82020545|0.7937715|0.7916484|0.76589364|0.75608826|0.75036424|0.7424773|0.7400421|0.7220614|0.7213352|0.71901155|0.715691|0.6994874|0.69632864|0.68844736|0.6884005|0.6841754|0.6765418|0.65788317|0.64958805|0.6455209|0.64480305|0.63841105|0.6332505|0.62727165|0.6267216|0.61853206|0.61134356|0.61027855|0.608575|0.60156167|0.6010661|0.5989811|0.5929117|0.59224814|0.5885218|0.5863432|0.5…	5.160209195136818e-06|1.423811691138326e-10|0.00023127022580073743|3.086355219737251e-10|5.160209195136818e-06|1.0|1.0|0.013337775930016798|1.0|0.008023213880574505|2.5737892926152175e-05|0.002681276482992379|1.7612709859685947e-10|1.7172617011797548e-05|1.7172617011797548e-05|0.0007319192412851627|1.0|0.018625096572861696|0.01730581299323415|3.670294979142335e-58|1.0|4.812079586288036e-19|0.0005…	8.536441513538072e-06|3.806983131385898e-10|0.0004570557822148961|1.0086128169075984e-09|1.3063820747181817e-05|1.0|1.0|0.02420648989113756|1.0|0.017254223399084955|7.752377387395233e-05|0.006719991185444559|8.508555487770989e-10|6.199500726280703e-05|6.52951217178614e-05|0.0020559529249583224|1.0|0.04252305153621392|0.03942098631716208|8.341579498050762e-57|1.0|4.9609067899876656e-18|0.001714448…	1	1
GO:0006490	DPAGT1 DHDDS ALG10B DOLK ALG8 ALG12 ALG1 ALG10 ALG6 RFT1 MPDU1 ALG14 ALG9 DOLPP1 DPM1 ALG3 NUS1 ALG2 ALG11 SRD5A3	20	oligosaccharide-lipid intermediate biosynthetic process	N-glycosylation	The system of interacting proteins primarily performs the biological process of N-glycosylation, which is the covalent attachment of oligosaccharides to asparagine residues of proteins. This process is essential for protein folding, stability, and function. 1. Dolichol phosphate pathway: DPAGT1, DOLK, DOLPP1, and DPM1 are involved in the synthesis of dolichol phosphate, a lipid carrier essential …	1	20	0.474511	264	0.978385	nitric-oxide synthase biosynthetic process	0.44126	496	0.959391	protein N-linked glycosylation|glycosylation|protein glycosylation|N-glycan processing|protein N-linked glycosylation via asparagine|protein O-linked glycosylation|lipid glycosylation|N-glycan fucosylation|protein deglycosylation|N-acetylglucosamine biosynthetic process|protein polyglycylation|O-glycan processing|N-terminal protein amino acid modification|protein deglycation|N-glycan processing t…	0.9406862|0.86127084|0.85604507|0.84327936|0.84301835|0.7953799|0.7362829|0.72427726|0.7169638|0.6849664|0.68354094|0.67972195|0.6783463|0.67244214|0.6635215|0.6342049|0.63335305|0.63244003|0.6315836|0.63081133|0.6266288|0.6262177|0.6251141|0.62073404|0.6188396|0.6188309|0.6117972|0.6116899|0.6084471|0.60814047|0.60636246|0.60578|0.60529965|0.60457754|0.6025391|0.59969556|0.5989854|0.5986372|0.59…	1.1510208784375512e-49|6.253233448632662e-38|1.1700263769405174e-38|1.0|0.0003513627375440729|0.10207499154230285|1.0|1.0|1.0|1.0|1.0|1.0|1.0|1.0|1.0|1.0|1.0|1.0|1.0|1.0|1.0|0.015064319332397309|0.0002944870965778343|1.0|1.0|1.0|8.057904612680537e-36|1.0|1.0|1.0|1.0|1.0|1.0|1.0|0.0092960441178717|1.0|3.318676018573811e-20|1.0|1.0|1.0|1.0|1.0|8.746723987991956e-63|0.019655952483445305|1.0|1.0|1.0|…	7.425941151210009e-49|3.722162767043251e-37|9.750219807837646e-38|1.0|0.0007274590839421799|0.16100156394684992|1.0|1.0|1.0|1.0|1.0|1.0|1.0|1.0|1.0|1.0|1.0|1.0|1.0|1.0|1.0|0.03701628877682646|0.0009438688992879304|1.0|1.0|1.0|2.0661293878668043e-34|1.0|1.0|1.0|1.0|1.0|1.0|1.0|0.026560126051062|1.0|5.721855204437605e-19|1.0|1.0|1.0|1.0|1.0|2.9155746626639856e-61|0.06010994643255445|1.0|1.0|1.0|1.0…	1	1
GO:0006450	IARS1 AARS1 LARS1 VARS1 AARSD1 GATC DTD2 TARS2 CDK5RAP1 PTGES3L-AARSD1 RPS5 IARS2 VARS2 AARS2 DTD1 YRDC DNAJC2 LARS2	18	regulation of translational fidelity	Aminoacyl-tRNA Synthesis	The primary biological process performed by this system of interacting proteins is aminoacyl-tRNA synthesis, which is essential for protein translation in cells. The majority of the proteins listed are aminoacyl-tRNA synthetases (ARSs), which catalyze the attachment of amino acids to their cognate tRNAs. 1. Aminoacyl-tRNA synthetases (IARS1, AARS1, LARS1, VARS1, AARSD1, IARS2, VARS2, AARS2, LARS2…	1	18	0.455172	222	0.981824	immune complex clearance by monocytes and macrophages	0.189316	8387	0.313329	tRNA aminoacylation|tRNA aminoacylation for protein translation|alanyl-tRNA aminoacylation|arginyl-tRNA aminoacylation|threonyl-tRNA aminoacylation|tRNA modification|tRNA transport|tRNA aminoacylation for mitochondrial protein translation|tRNA processing|methionyl-tRNA aminoacylation|tyrosyl-tRNA aminoacylation|tRNA transcription|tRNA surveillance|seryl-tRNA aminoacylation|tRNA import into mitoch…	0.91428715|0.8806361|0.7776801|0.73589516|0.7306222|0.72367585|0.71847403|0.7109795|0.7101313|0.7071728|0.7066468|0.7040005|0.69943464|0.6786499|0.6685188|0.66560173|0.66447014|0.66408485|0.6640602|0.66114956|0.65795934|0.6567219|0.6549487|0.6545766|0.6467865|0.6416047|0.6400072|0.63933665|0.6309253|0.6302984|0.63029313|0.63003325|0.62750024|0.62363577|0.6166532|0.6132257|0.6124708|0.61236525|0.6…	3.9371550549204977e-28|1.4329978717255686e-25|8.502266327251993e-13|1.0|0.003146484119345115|2.3420210859479657e-06|1.0|2.9040767610834105e-05|9.734102194824614e-06|1.0|1.0|1.0|1.0|1.0|1.0|1.0|1.0|1.0|1.041050456645946e-06|1.0|1.0|1.0|1.041050456645946e-06|5.777403188883092e-30|1.041050456645946e-06|1.0|1.0|1.0|1.0|1.0|1.0|1.0|0.0020986964823247684|1.0|1.0|1.0|0.0052389430397894515|0.060192223394…	1.5379511933283194e-27|6.513626689661675e-25|3.047407285753402e-12|1.0|0.005752256159680283|6.848014871192882e-06|1.0|7.523514925086555e-05|2.923153812259644e-05|1.0|1.0|1.0|1.0|1.0|1.0|1.0|1.0|1.0|4.487286451060112e-06|1.0|1.0|1.0|4.5067119335322335e-06|1.0504369434332895e-28|4.710635550434145e-06|1.0|1.0|1.0|1.0|1.0|1.0|1.0|0.006683746758996078|1.0|1.0|1.0|0.017941585752703604|0.132874665330038…	1	1
GO:0006953	SERPINF2 A2M FN1 ASS1 UGT1A1 TRPV1 APOL2 HAMP IL1B TNFSF11 EDNRB REG3G PTGES SAA1 CD163 SERPINA1 CEBPB HP ORM2 SAA4 EPO IL1A CNR1 ITIH4 SAA2 PTGS2 MRGPRX1 INS F2 APCS F8 SIGIRR SERPINA3 IL22 AHSG TNF IL6 CRP TFRC IL6R LBP PLSCR1 ORM1 PTGER3 MBL2 TNFRSF11A REG3A TFR2	48	acute-phase response	Acute Phase Response	The most prominent biological process performed by this system of interacting proteins is the acute phase response (APR), which is a rapid inflammatory response to tissue injury, infection, or inflammation. The APR is characterized by the increased production of acute phase proteins (APPs) by the liver, which play a crucial role in the body's defense against pathogens and tissue repair. 1. Acute …	0.5625	27	0.989789	1	0.999918	regulation of fermentation	0.377431	2409	0.802767	acute-phase response|acute inflammatory response|regulation of acute inflammatory response|positive regulation of acute inflammatory response|response to iron ion|response to iron(II) ion|response to iron(III) ion|response to unfolded protein|response to type I interferon|response to iron ion starvation|response to interferon-alpha|inflammatory response|response to lipopolysaccharide|cellular res…	0.9897888|0.80960906|0.7036586|0.6745191|0.6700989|0.6683452|0.667868|0.6669072|0.65628254|0.65606934|0.65595025|0.6469201|0.6458752|0.63944113|0.6352369|0.6342174|0.62842077|0.6273503|0.62727356|0.6253849|0.6250753|0.6248316|0.61992997|0.61865675|0.61582243|0.6138936|0.61054915|0.60980034|0.60857725|0.6061721|0.6049458|0.6042578|0.60004187|0.5993508|0.59766567|0.5965317|0.59577787|0.5956398|0.59…	7.654357167489578e-143|1.6680411914827737e-110|2.53490512145333e-21|4.356108352264809e-15|8.760978056066745e-05|1.0|1.0|1.0|1.0|0.00837594513954404|1.0|2.70863721756206e-65|6.912064474876326e-15|0.02492226653627818|0.0022098445064709163|9.224650415900803e-32|0.060739546475167036|6.2459451455972e-49|1.0|0.0040666742118603254|1.0|1.0|1.0|1.0|0.00015574888689485558|0.021178872038169785|0.04119815244…	1.214977328172949e-141|2.3829159878325337e-109|1.2816530721958678e-20|1.8776329104589692e-14|0.00019212671175584966|1.0|1.0|1.0|1.0|0.017897318674239403|1.0|6.771593043905151e-64|4.510371314276992e-14|0.054415429118511306|0.005956454195339397|1.647259002839429e-30|0.12245876305477225|1.2246951265876863e-47|1.0|0.009705666376754954|1.0|1.0|1.0|1.0|0.0005542665014051799|0.05018690056438338|0.094708…	1	1
GO:0019076	VPS37B CHMP6 CHMP2A PC TRIM25 PPIA CHMP2B CHMP5 CHMP4B TRIM62 TSG101 DDB1 PPID ZNF502 VAPA RAB7A CHMP7 RNF103-CHMP3 IST1 CHMP1B CAV2 VPS4A ARL8B CHMP4A TRIM31 CHMP3 CHMP4C VPS4B CHMP1A	29	viral release from host cell	ESCRT-Mediated Membrane Remodeling	The primary biological process performed by this system of interacting proteins is endosomal sorting complex required for transport (ESCRT)-mediated membrane remodeling. This process is crucial for various cellular events, including multivesicular body (MVB) formation, viral budding, and cytokinesis. 1. ESCRT components: The presence of several ESCRT subunits (VPS37B, TSG101, CHMP6, CHMP2A, CHMP2…	0.965517	28	0.432352	1593	0.869576	response to interferon-alpha	0.316258	7323	0.400442	ESCRT complex disassembly|ESCRT III complex disassembly|viral budding via host ESCRT complex|regulation of viral budding via host ESCRT complex|endosome membrane tubulation|endosome transport via multivesicular body sorting pathway|endosome to lysosome transport via multivesicular body sorting pathway|endosome fission|synaptic vesicle endosomal processing|vesicle-mediated transport between endoso…	0.8417868|0.8309678|0.75521195|0.7243161|0.70767|0.7015445|0.67914206|0.67460227|0.6728829|0.6602782|0.6589258|0.6580693|0.6547474|0.6539824|0.64934766|0.6480175|0.64494395|0.6423313|0.6388157|0.637318|0.6312907|0.6263248|0.6248159|0.6208061|0.6192217|0.61691725|0.61513376|0.6095743|0.6082151|0.6076584|0.6048351|0.6043549|0.60415554|0.60413504|0.6034068|0.60286784|0.5994195|0.5974748|0.59427845|0…	2.842054631853708e-25|2.842054631853708e-25|1.8757792890831128e-41|1.7383971295584253e-08|1.0|2.5971665385608516e-36|1.0932540974374798e-37|1.0|1.0|5.885957175896301e-05|3.5566350111932117e-17|1.7788675930695438e-34|2.762526048354599e-06|3.2957795501192386e-11|8.387825228303995e-35|1.0663140271824161e-26|0.020116090046456515|3.2535111671743925e-37|1.0|1.0904373262246387e-41|1.0|2.247537649190645e…	1.0448730264168043e-24|1.2687743892204053e-24|1.6748029366813507e-40|4.9526983748103286e-08|1.0|2.146418626909795e-35|1.1507937867762945e-36|1.0|1.0|0.00016769108763237326|2.371090007462141e-16|2.5780689754631068e-33|9.727204395614786e-06|1.9273564620580342e-10|1.233503710044705e-33|1.545382648090458e-25|0.0458225285796276|5.247598656732891e-36|1.0|1.880064355559722e-40|1.0|4.406936567040481e-40|…	1	1
GO:0061049	GATA4 CTDP1 RGS4 AKAP13 RGS2 GSK3A IGF1 HAMP EDN1 TOMM70 ADRA1A CAV3 G6PD FOXP1 PDLIM5 PARP2 MAP2K4 YY1 SORBS2 PI16 PPARA AKAP6 AGT	23	cell growth involved in cardiac muscle cell development	Regulation of Cardiac Hypertrophy	The most prominent biological process performed by this system of interacting proteins is the regulation of cardiac hypertrophy. Cardiac hypertrophy is the enlargement of the heart muscle, which can lead to heart failure if left unchecked. 1. GATA4: GATA4 is a transcription factor involved in cardiac development and hypertrophy. It regulates the expression of genes associated with cardiac muscle …	0.956522	22	0.530782	137	0.988783	regulation of Schwann cell proliferation	0.498774	239	0.980432	regulation of cardiac muscle hypertrophy|regulation of cardiac muscle hypertrophy in response to stress|regulation of muscle hypertrophy|regulation of heart growth|regulation of skeletal muscle hypertrophy|regulation of cardiac muscle tissue growth|positive regulation of cardiac muscle hypertrophy|regulation of heart rate by hormone|positive regulation of cardiac muscle hypertrophy in response to…	0.95705926|0.86144125|0.8371757|0.8171278|0.80715096|0.78453517|0.7794541|0.7644412|0.7518225|0.75112426|0.73000246|0.72867996|0.7286165|0.7225878|0.70980895|0.7067026|0.70274067|0.6957035|0.6884614|0.68688166|0.6868776|0.68671477|0.6784363|0.67792714|0.6775602|0.6724732|0.67216146|0.67111444|0.6639341|0.6637083|0.66155833|0.66134393|0.65466046|0.653324|0.6384647|0.6343342|0.62790656|0.6255412|0.…	1.272999716550073e-42|1.0|4.072328747164963e-42|1.3630157044709967e-35|1.0|1.3560783308338622e-36|1.8398925495997986e-15|1.0|1.0|2.5296029566736823e-07|1.0807957742807854e-75|1.0|1.0|3.0564117934401967e-26|1.0|1.6551021932596126e-10|2.6604515568619765e-06|1.0|0.03432494014342164|0.0008862274583683303|1.0|9.2662637725877e-50|1.0|1.0|1.0|1.0|7.383007987036418e-56|1.0|1.0|1.0|2.4818243865179654e-15|…	6.807485115241032e-42|1.0|3.736081419417397e-41|1.0904125635767973e-34|1.0|1.1395616225494641e-35|1.0394873161580783e-14|1.0|1.0|8.875799847977833e-07|3.002210484113293e-74|1.0|1.0|3.4341705544271874e-25|1.0|1.0154001185641794e-09|1.0684544405068179e-05|1.0|0.07303178753919498|0.00236959213467468|1.0|2.1059690392244775e-48|1.0|1.0|1.0|1.0|2.8396184565524687e-54|1.0|1.0|1.0|2.2979855430721902e-14|…	1	1
GO:0031063	USP17L2 TADA3 SIRT1 MAPK8 LRRK2 AKAP8L TADA2A DR1 SUV39H1 C6orf89 KAT14 PRMT6 FOXP3 YEATS2 APLNR SGF29 MBIP SREBF1 ING2 PRKD2 SDR16C5 AKAP8 UCN NCAPG2 TP53 SAP30BP JDP2 VEGFA WDR5 PINK1 ZZZ3 KAT2A SPHK2 SMARCA5 PRKD1 RRP8 CAMK2D KAT2B BAZ2A SKI BCL6 NIPBL CTBP1	43	regulation of histone deacetylation	Chromatin Remodeling and Transcription Regulation	The primary biological process performed by this system of interacting proteins is chromatin remodeling and transcription regulation. The proteins involved in this process are: 1. TADA3, TADA2A, and DR1: These proteins are components of the ADA complex, which is involved in chromatin remodeling and transcription regulation. TADA3 and TADA2A are transcriptional adaptor proteins, while DR1 is a neg…	0.488372	21	0.595656	24	0.998035	negative regulation of reactive oxygen species metabolic process	0.151624	11582	0.0517439	chromatin remodeling|transcription initiation-coupled chromatin remodeling|transcription elongation-coupled chromatin remodeling|DNA repair-dependent chromatin remodeling|regulation of chromatin binding|regulation of chromatin organization|chromatin organization|chromatin looping|regulation of ncRNA transcription|regulation of protein localization to chromatin|regulation of transcription regulato…	0.8601379|0.854483|0.832754|0.7918278|0.76537126|0.7302393|0.6924082|0.6836808|0.66954386|0.6656148|0.6628697|0.65843415|0.6400436|0.62146413|0.61979365|0.6128401|0.61247736|0.61049247|0.608911|0.60820425|0.6053159|0.6030837|0.6030706|0.5956564|0.5945702|0.59280366|0.59227526|0.5921128|0.59207386|0.59072983|0.59005976|0.58949614|0.58874214|0.5880711|0.58520555|0.582402|0.58181655|0.5806651|0.5769…	1.523765452750095e-14|3.5132832410613415e-07|1.0|1.0|1.0|1.0|3.9820167555319555e-15|1.0|1.0|1.0|1.0|1.0|1.0|0.0003331176461481584|0.007524804031243143|1.0790785275357058e-11|1.0|3.920014178984509e-07|1.0|1.0|1.0|1.0|4.951695833428523e-90|5.446620930710748e-130|1.0516838470013559e-07|1.0|2.2476606929193924e-19|0.17200312887397293|1.0|1.0|1.0|0.0005732265634831952|1.0|1.0|1.0|1.0|0.1508605578420603…	4.096143690188427e-14|7.45920008717907e-07|1.0|1.0|1.0|1.0|2.2122315308510863e-14|1.0|1.0|1.0|1.0|1.0|1.0|0.0010241256512910607|0.018579763040106525|7.546003689060881e-11|1.0|1.7818246268111404e-06|1.0|1.0|1.0|1.0|2.3579503968707253e-88|4.53885077559229e-128|5.056172341352673e-07|1.0|2.741049625511454e-18|0.33925666444570596|1.0|1.0|1.0|0.001990370012094428|1.0|1.0|1.0|1.0|0.3468058800966904|0.06…	0.00543684	0.129449
GO:0051654	TRAK1 UXT WASF1 UBB MGARP MARK1 SPAST MAP1S TRAK2 HSBP1 RHOT2 MYO19 UCHL1 OPA1 FEZ1 ACTR10 NECTIN2 AGTPBP1 NEFL RHOT1 LRPPRC SYBU HDAC6 HAP1 HIF1A MAP1B ARMCX3 AGBL4 MAPT	29	establishment of mitochondrion localization	Mitochondrial Dynamics and Trafficking	1. Central role of TRAK1 and TRAK2: - TRAK1 and TRAK2 are key adaptors in mitochondrial trafficking, linking mitochondria to motor proteins. - Both proteins interact with RHOT1 and RHOT2, which are mitochondrial Rho GTPases involved in mitochondrial transport regulation. 2. Involvement of motor proteins: - MYO19, a myosin motor protein, is involved in mitochondrial movement along actin filaments.…	1	29	0.64564	56	0.995415	detection of mechanical stimulus involved in sensory perception of pain	0.287285	8088	0.337809	mitochondrial transport|mitochondrial transmembrane transport|mitochondrion distribution|dendritic transport of mitochondrion|mitochondrion morphogenesis|mitochondrion to lysosome transport|intracellular distribution of mitochondria|mitochondrion organization|mitochondrial fusion|regulation of mitochondrial fusion|mitochondrial membrane organization|maintenance of mitochondrion location|mitochond…	0.83271986|0.8271272|0.7936421|0.78229547|0.77551425|0.7640654|0.7576959|0.7517925|0.7482402|0.7272837|0.72430813|0.7235683|0.7234509|0.7163058|0.71016705|0.7079953|0.7074541|0.70688653|0.7041096|0.70327216|0.7029724|0.70290697|0.7022023|0.69931424|0.6985179|0.69670254|0.69384694|0.6935542|0.6933838|0.6913663|0.6904243|0.68683684|0.68604463|0.6857085|0.6841301|0.6784952|0.6757626|0.6754233|0.6739…	0.00367419110623794|1.0|8.893045795903271e-09|2.762526048354599e-06|0.0005150551267576296|1.0|0.011782325648608795|3.303169613242686e-17|0.05116988912864911|1.0|0.001019085189989133|1.0|1.2275788547949612e-80|0.1618780997335712|1.3639084032309829e-53|9.886298644552434e-79|0.24084147369647524|1.0|1.0|1.0|3.816768868663549e-05|0.19820970911031466|0.0017735196231201487|1.0|1.0|4.3509422683349084e-09…	0.004771676761347974|1.0|2.562837405159444e-08|6.70516031154029e-06|0.0010426217140842705|1.0|0.020816829767860062|2.131077169833991e-16|0.09137480201544483|1.0|0.002451905882689147|1.0|3.8361839212342533e-79|0.30892767124727327|2.7834865372060874e-52|4.298390715022797e-77|0.45700469392120535|1.0|1.0|1.0|0.00012982207036270577|0.3894100375448225|0.005038408020227696|1.0|1.0|2.377564081057327e-08|…	1	1
GO:1903307	KCNB1 IL4R RAB27A DOC2B STXBP1 CACNA1H SYT7 GATA2 STX1A RAB3D SYT4 PTAFR SLC4A8 CD177 AP1G1 SYT10 F2RL1 GAB2 IL13 LAMP1 ADORA2B STX4 GATA1 SYT1 SYT9 ZP3 NLGN1 ITGB2 RAB15 PLA2G3 CDK5 HYAL3 KLRC2 FGR SNX4 SCAMP5 CACNA1I SYK ITGAM IL4 VAMP7 VAMP8 SPHK2 UNC13D RAB3A HLA-F CDK5R2 CACNA1G	48	positive regulation of regulated secretory pathway	Calcium-Dependent Exocytosis	The most prominent biological process performed by this system of interacting proteins is calcium-dependent exocytosis. This process is crucial for the regulated release of neurotransmitters, hormones, and other cellular contents. 1. Presence of key proteins involved in exocytosis: The system includes several proteins that are essential for exocytosis, such as STXBP1, STX1A, STX4, VAMP7, and VAMP…	0.645833	31	0.362354	2815	0.769527	transcription initiation at RNA polymerase III promoter	0.259249	8332	0.317832	calcium-ion regulated exocytosis|calcium ion-regulated exocytosis of neurotransmitter|calcium ion regulated lysosome exocytosis|positive regulation of calcium ion-dependent exocytosis|regulation of calcium ion-dependent exocytosis|regulated exocytosis|exocytosis|release of sequestered calcium ion into cytosol by endoplasmic reticulum|synaptic vesicle exocytosis|negative regulation of calcium ion-…	0.8977657|0.8397348|0.8129304|0.7958063|0.7871789|0.77536225|0.7648467|0.7552625|0.7545699|0.75176245|0.7489066|0.74190027|0.73437417|0.72875166|0.72729963|0.7268743|0.7240577|0.7165735|0.71598285|0.7134704|0.70982814|0.7082733|0.70633686|0.7039786|0.7035631|0.6979046|0.69358826|0.6918102|0.6907532|0.68038225|0.6729331|0.6709613|0.668798|0.6577378|0.6571497|0.65697235|0.65641415|0.65294087|0.6512…	1.563313375308478e-34|1.157157552822462e-09|0.00837594513954404|1.5921932433295897e-45|1.6817745438806687e-36|1.8229693086387606e-92|1.3475754729027767e-82|1.0|5.731017974928597e-19|0.022183444415212694|0.00011430656497024054|0.28853366871689257|2.4375408909283526e-06|7.151634715482125e-07|1.0|1.0|1.0|1.0|4.094708213914185e-07|1.3226387626428977e-25|4.588657584312768e-05|1.0|1.0|1.935080553478916…	7.339499414593793e-34|2.900144242662812e-09|0.013422989005679552|1.530955041663067e-44|1.6170909075775663e-35|3.3144896520704737e-91|3.2085130307208967e-81|1.0|4.183224799217954e-18|0.04307464934992756|0.00032108585665797907|0.5143202650925001|8.613218695859904e-06|2.8721424560169176e-06|1.0|1.0|1.0|1.0|1.8612310063246297e-06|1.5029985939123838e-24|0.00015450025536406625|1.0|1.0|8.413393710777898…	1	1
[truncated: 834 more rows]
